# Supplementary material
Source: publisher site journal article supplement (https://www.dovepress.com/get_supplementary_file.php?f=312277.xlsx)
Supplement: Supplementary file 1 [file get_supplementary_file.php]

## Sheet: Table S1
Table S1. Gene expression profiling of GSE99671.
Symbol	OSVN001T	OSVN001N	OSDN001N	OSDN001T	OSVN003N	OSVN003T	OSVN004T	OSVN004N	OSVN005T	OSVN005N	OSVN006T	OSVN006N	OSVN008N	OSVN008T	OSHN008T	OSHN008N	OSHN009T	OSHN009N	OSHN010T	OSHN010N	OSHN011T	OSHN011N	OSHN012T	OSHN012N	OSHN013T	OSHN013N	OSHN014T	OSHN014N	OSVN015N	OSVN015T	OSHN015T	OSHN015N	OSHN016T	OSHN016N	OSHN017N	OSHN017T
A1BG	1	0	5	17	9	19	9	12	8	6	8	4	6	5	8	7	3	2	1	12	4	10	1	6	7	5	20	15	17	13	11	13	9	6	9	17
A1BG-AS1	8	13	8	65	30	44	11	15	21	5	9	3	8	31	23	18	21	3	29	35	9	16	22	14	8	8	19	3	4	20	24	21	24	20	8	35
A1CF	24	17	32	22	25	22	30	24	32	25	21	16	27	11	29	21	21	18	22	29	10	35	20	21	35	17	29	26	29	38	40	36	35	31	15	25
A2LD1	7	21	51	50	65	128	57	61	110	65	20	14	26	26	76	70	43	12	49	53	78	62	46	41	80	55	46	50	77	55	128	115	91	50	63	123
A2M	465	1372	1197	4374	7305	5235	5567	3471	8135	3467	485	312	3061	716	8224	5089	9936	1379	5913	6913	3559	3167	7328	4672	18464	5162	5990	4290	5908	7448	10790	12922	3395	8346	4261	5992
A2ML1	7	3	7	6	10	9	6	6	4	10	5	4	5	5	10	6	4	2	5	6	4	10	6	9	6	11	4	3	6	1	14	7	9	12	8	5
A4GALT	3	8	22	18	7	30	40	13	38	23	6	5	14	12	28	19	16	5	15	30	33	23	21	20	24	18	12	11	33	6	19	31	22	34	13	15
A4GNT	5	12	1	5	4	14	4	2	4	6	3	2	3	6	3	2	6	0	9	4	3	2	6	3	6	10	8	5	6	4	2	3	2	9	2	3
AA06	1	0	0	0	0	1	0	1	0	1	0	2	2	0	1	0	1	0	0	0	1	0	1	1	3	0	0	0	0	2	0	1	0	1	0	2
AAA1	11	7	13	10	13	13	7	11	9	15	16	15	20	77	9	15	20	8	17	15	11	14	13	10	19	11	15	7	12	10	12	17	5	14	6	12
AAAS	13	53	130	110	101	139	44	47	98	50	22	15	68	111	100	59	161	17	128	138	114	272	131	80	145	107	146	78	120	94	133	139	179	117	63	129
AACS	9	20	24	40	17	40	12	13	40	17	15	9	25	47	22	22	48	11	31	15	21	44	37	26	63	24	51	40	45	34	47	48	41	29	27	34
AACSP1	5	5	6	1	10	6	4	7	3	1	2	1	13	13	6	3	1	3	5	3	0	5	6	8	2	1	11	10	3	1	6	3	4	2	2	4
AADAC	4	2	2	4	7	4	3	0	0	5	3	0	13	6	5	2	2	4	7	2	2	6	5	2	5	4	7	5	4	6	3	2	4	3	2	7
AADACL2	3	4	2	2	4	2	2	2	3	2	5	3	2	2	0	2	1	3	1	3	3	3	4	4	0	2	12	4	2	2	7	0	0	8	1	4
AADACL3	19	16	21	29	14	12	16	14	11	13	16	12	8	9	14	9	16	4	9	9	5	10	10	14	17	7	19	21	22	15	18	20	13	11	17	20
AADACL4	0	1	3	4	2	2	3	4	2	1	4	4	1	0	3	3	1	3	0	3	1	1	3	4	1	2	4	0	2	1	3	5	3	3	1	3
AADAT	13	69	23	145	190	45	57	59	98	21	81	8	25	8	68	65	67	49	76	74	117	46	91	124	247	139	328	113	70	179	157	139	76	92	78	154
AAGAB	25	40	103	95	119	189	79	55	223	85	23	14	87	111	100	108	157	33	155	119	151	232	112	60	139	79	135	171	139	108	114	176	296	110	162	124
AAK1	199	578	807	1071	1245	1617	741	629	1235	716	219	129	963	1018	749	1053	1381	488	1563	1434	1173	1302	1811	908	1676	1317	914	695	1437	1039	1566	1546	1972	1597	1380	1269
AAMP	19	36	66	231	98	139	68	53	123	56	17	16	58	100	97	80	46	25	81	79	73	103	87	57	84	83	120	131	85	87	139	132	128	92	83	111
AANAT	3	3	1	2	2	2	4	6	3	2	4	1	6	1	5	3	4	1	7	4	0	2	5	5	3	1	5	2	4	4	7	5	1	4	4	4
AARS	57	93	268	752	256	454	282	212	451	229	51	36	252	721	310	275	605	118	360	354	448	489	772	207	553	266	539	398	378	398	587	620	483	328	378	337
AARS2	20	54	79	136	105	66	51	30	61	35	32	18	56	59	42	83	51	28	111	49	87	127	60	50	113	66	104	52	76	148	69	108	116	84	59	64
AARSD1	9	17	26	64	33	34	17	20	26	25	15	8	56	14	54	39	42	15	21	22	41	38	28	16	56	18	52	42	27	44	33	55	50	57	34	23
AASDH	27	42	99	86	143	135	52	62	92	71	32	15	81	95	124	132	148	35	162	181	155	243	148	94	158	148	133	120	119	95	158	191	251	144	123	113
AASDHPPT	15	37	92	191	120	146	110	76	124	99	17	13	131	303	233	147	188	50	185	173	231	373	241	139	473	151	327	276	224	280	404	266	442	204	180	211
AASS	65	219	119	237	451	223	190	103	180	108	68	37	284	235	274	538	267	161	319	299	139	181	225	418	487	726	284	305	357	206	120	443	143	618	220	210
AATF	86	158	315	439	400	398	225	227	380	196	132	32	214	327	245	313	729	146	299	306	256	555	406	245	489	277	625	323	346	405	472	469	732	387	324	400
AATK	12	15	27	25	12	14	16	12	14	12	16	6	14	15	11	14	12	10	18	17	17	20	8	15	35	20	12	13	9	22	14	14	17	36	15	15
ABAT	15	39	77	45	46	61	48	48	133	68	22	24	43	50	66	62	56	33	73	80	63	201	76	76	65	95	48	46	91	62	131	159	52	118	90	106
ABCA1	238	526	498	1973	2408	2167	967	967	3345	842	174	137	757	2205	1602	1551	3539	509	2829	3338	1497	1238	2995	1108	3040	1438	718	955	1492	1653	2303	3293	3191	2440	1261	1922
ABCA10	15	100	85	25	25	32	42	18	27	49	8	13	100	20	47	279	47	118	44	51	31	67	26	206	35	473	19	84	140	23	29	167	23	480	74	45
ABCA11P	11	21	39	80	45	47	44	25	44	26	9	6	32	29	43	74	50	13	60	51	62	69	59	62	92	53	61	56	67	59	37	54	49	80	39	53
ABCA12	9	18	23	26	32	18	18	14	18	26	17	12	14	43	17	13	38	20	22	16	25	27	20	16	22	18	30	23	23	37	21	27	120	28	25	18
ABCA13	51	55	2431	287	136	139	58	75	78	81	76	51	350	1654	95	76	123	61	104	118	75	2433	76	303	309	1269	36	128	164	78	34	92	110	478	1713	61
ABCA17P	6	6	11	7	4	4	4	5	6	9	7	7	8	4	6	12	8	4	6	6	2	10	2	7	10	5	7	4	6	8	5	8	7	2	5	5
ABCA2	16	47	28	30	55	54	45	16	48	35	48	11	35	100	48	35	182	44	65	67	30	54	60	51	46	66	85	56	53	28	66	120	44	84	51	51
ABCA3	10	12	21	13	23	20	23	17	20	23	12	4	13	6	19	37	22	18	26	25	13	16	19	20	25	23	18	16	43	32	26	48	16	36	27	22
ABCA4	12	11	10	29	26	22	19	13	12	12	8	10	88	804	23	16	34	19	25	37	20	27	33	25	84	7	11	13	13	56	16	16	12	9	15	8
ABCA5	32	96	143	183	202	117	105	42	72	53	103	26	225	218	166	334	244	94	164	147	106	177	183	206	219	376	165	170	191	219	123	206	272	313	127	98
ABCA6	21	154	171	83	79	94	231	70	141	109	17	8	189	26	476	874	166	178	334	187	236	190	103	571	94	1050	58	226	387	60	83	457	136	990	165	114
ABCA7	20	6	105	19	43	33	18	14	16	21	18	11	17	16	25	12	14	12	19	20	5	127	24	17	26	36	24	18	31	29	17	29	30	38	14	16
ABCA8	26	115	151	127	89	53	535	70	303	260	19	17	250	35	473	882	384	125	185	323	210	388	76	505	22	839	78	476	1042	18	107	1281	69	1056	496	169
ABCA9	17	66	78	30	36	21	57	19	13	31	10	15	74	10	74	271	80	49	109	67	51	61	38	208	26	283	21	74	136	38	30	83	51	337	37	36
ABCB1	11	21	27	27	45	39	83	31	47	66	1	8	43	12	110	114	52	21	57	90	9	78	50	35	45	69	21	92	94	153	51	96	33	118	52	17
ABCB10	26	46	740	188	85	113	56	74	100	65	17	14	90	149	78	122	66	58	127	143	74	1453	130	113	124	284	134	106	201	95	81	101	120	192	321	151
ABCB11	2	8	9	6	6	8	5	5	2	8	5	5	7	4	7	4	7	6	8	11	1	9	7	7	5	5	7	3	8	10	5	4	6	3	3	5
ABCB4	11	12	11	117	98	17	26	12	11	14	11	5	16	15	63	48	111	14	44	20	17	65	27	60	36	27	19	51	25	212	45	55	39	50	41	19
ABCB5	17	38	18	33	152	30	22	33	20	29	30	14	41	18	43	17	18	25	57	39	10	36	62	62	36	48	32	18	65	45	29	114	27	30	27	26
ABCB6	10	34	167	140	52	58	24	14	64	25	14	6	114	362	37	31	116	16	56	51	55	122	66	59	53	87	72	41	54	52	47	54	113	80	65	43
ABCB7	20	56	179	89	188	144	87	89	156	79	33	6	70	112	212	162	116	72	163	165	287	331	181	131	263	184	225	150	133	154	135	210	229	200	153	155
ABCB8	13	15	24	22	24	24	18	17	34	9	12	2	19	20	18	11	31	9	21	19	13	27	18	23	28	15	14	19	22	38	16	18	34	11	16	23
ABCB9	5	8	7	8	12	15	11	9	8	16	12	12	5	3	12	8	7	6	3	13	6	6	7	3	16	17	8	6	8	10	8	19	6	12	13	12
ABCC1	57	111	122	131	241	268	136	103	228	119	64	16	360	2573	172	149	250	98	311	354	206	349	315	172	214	243	241	120	166	138	193	344	242	269	135	140
ABCC10	16	22	42	64	85	51	28	19	33	16	16	12	48	32	26	31	52	20	50	34	35	55	60	34	39	42	44	18	29	59	50	54	27	45	38	25
ABCC11	4	6	6	6	8	5	8	4	3	6	5	7	3	7	5	7	7	4	9	5	4	12	7	5	7	6	6	11	3	10	8	4	4	9	3	14
ABCC12	7	5	4	8	10	8	6	7	4	9	7	8	9	5	2	4	8	6	7	8	4	11	6	5	5	7	9	4	3	4	7	7	8	4	3	5
ABCC13	7	5	68	4	4	5	13	9	6	7	5	5	5	7	9	1	7	4	6	5	5	71	6	7	8	17	5	17	11	13	5	8	4	12	16	5
ABCC2	5	8	10	13	21	18	7	8	8	11	8	5	9	40	6	16	22	7	18	13	8	16	18	22	23	16	7	11	14	6	14	12	17	27	11	5
ABCC3	17	19	45	49	69	39	19	25	77	12	19	9	49	390	75	22	45	9	72	98	53	31	54	33	64	47	23	23	21	35	65	45	117	123	21	28
ABCC4	31	34	254	101	89	221	63	86	124	42	23	18	132	237	182	82	186	44	134	196	167	288	188	72	85	193	363	185	116	224	171	106	395	119	181	98
ABCC5	67	177	359	235	623	329	103	94	169	97	103	42	394	768	180	180	121	107	449	390	178	303	306	333	208	433	270	127	162	295	266	275	289	502	171	166
ABCC6	4	6	6	12	5	6	3	5	6	5	5	7	9	13	7	8	5	10	4	7	5	10	4	3	7	11	9	3	17	18	9	11	4	11	8	4
ABCC6P1	1	1	6	4	4	5	5	3	4	6	3	2	4	2	8	6	7	3	0	2	3	6	2	2	11	4	7	2	5	6	2	7	1	4	4	11
ABCC6P2	1	1	0	0	0	0	0	0	0	2	1	0	0	0	0	0	0	0	0	0	0	0	1	0	0	0	0	0	0	1	0	0	0	0	1	0
ABCC8	7	28	9	8	12	8	5	7	3	6	8	12	8	5	4	14	6	10	5	7	1	20	8	15	9	47	4	10	18	11	2	52	3	23	14	12
ABCC9	82	214	189	447	472	688	872	534	498	342	81	44	770	188	904	663	695	202	535	635	494	423	779	500	2427	326	679	313	817	497	489	649	172	419	678	1194
ABCD1	13	8	11	17	16	16	16	11	17	13	8	11	5	16	15	7	15	3	18	13	6	24	18	8	18	6	28	15	9	11	14	15	26	15	4	23
ABCD2	13	6	25	12	20	38	93	32	20	46	14	15	26	14	47	310	60	31	32	48	39	95	14	30	16	42	22	51	351	25	54	89	87	9	79	20
ABCD3	29	91	144	215	233	192	113	110	208	92	31	13	151	226	229	189	436	72	183	262	208	372	298	141	507	243	263	233	235	285	266	341	538	221	282	356
ABCD4	17	65	51	159	151	116	91	54	88	47	18	15	78	62	92	75	47	24	114	136	98	93	96	59	172	133	74	68	117	132	121	137	140	167	62	101
ABCE1	37	108	175	380	309	338	181	194	362	202	47	20	250	405	387	265	316	143	349	413	701	433	425	257	746	277	528	382	275	447	444	495	927	297	343	461
ABCF1	146	184	335	1020	540	505	287	242	467	260	118	30	340	487	434	308	636	123	372	375	738	667	859	245	941	274	1001	428	440	872	543	630	843	412	414	472
ABCF2	28	45	62	217	92	123	69	74	152	63	30	12	79	125	118	90	226	54	142	149	136	146	181	85	220	76	166	100	131	241	143	197	338	116	141	160
ABCF3	16	45	37	133	77	75	58	35	115	48	26	11	46	185	75	66	90	43	79	84	62	95	93	52	100	72	151	79	63	91	91	87	171	55	43	56
ABCG1	12	49	39	68	103	134	87	58	156	88	16	9	54	15	93	67	58	33	118	149	76	65	112	59	87	39	34	57	112	81	85	85	116	162	30	68
ABCG2	21	30	123	39	171	37	139	54	59	72	10	18	65	27	214	321	165	44	134	117	49	259	106	184	146	435	72	119	470	157	131	541	86	280	186	150
ABCG4	5	6	9	9	5	11	13	4	8	6	7	5	3	9	3	3	9	5	3	15	3	10	10	9	10	4	6	4	5	6	5	16	5	7	7	7
ABCG5	4	6	4	6	4	8	10	5	1	4	1	3	6	2	8	22	7	5	8	1	3	5	7	17	5	24	5	6	14	12	6	12	5	26	3	4
ABCG8	4	3	4	1	3	4	4	6	5	3	4	2	4	2	3	4	5	2	0	4	1	6	5	5	2	7	5	2	4	2	2	6	6	4	2	3
ABHD1	1	1	10	6	3	5	3	5	9	6	1	3	6	6	6	3	2	6	6	6	8	6	3	1	14	7	14	11	6	14	5	2	9	13	1	6
ABHD10	22	48	189	102	212	244	132	128	262	97	26	19	138	313	168	200	232	48	215	226	247	501	279	167	414	264	240	335	251	287	387	367	288	211	333	333
ABHD11	1	4	3	5	5	9	3	7	11	6	8	2	8	6	14	7	7	1	7	9	12	11	14	4	25	3	10	11	10	12	12	14	32	22	7	9
ABHD12	12	16	21	89	58	89	53	36	98	36	16	6	23	65	49	31	77	13	72	103	85	72	82	17	98	32	61	41	54	97	120	63	99	44	45	60
ABHD12B	3	9	38	14	6	6	2	2	1	7	4	3	6	4	5	14	5	5	12	7	9	13	9	10	9	22	8	4	9	5	19	11	5	18	18	10
ABHD13	29	35	144	118	132	130	90	70	166	85	20	15	113	100	165	178	97	54	165	187	226	330	195	99	244	190	193	174	226	235	208	261	216	245	221	254
ABHD14A	1	8	11	29	14	29	19	5	20	13	2	5	6	23	15	14	34	16	17	18	19	27	24	15	20	24	25	18	24	16	28	32	29	15	31	34
ABHD14A-ACY1	0	18	12	51	27	36	34	17	52	18	4	9	26	48	48	24	26	9	36	50	36	38	40	13	40	16	51	46	50	36	68	65	59	37	22	50
ABHD14B	17	30	69	111	90	169	101	59	128	71	13	11	109	162	111	122	71	36	90	103	96	159	112	80	71	149	145	94	221	104	143	214	182	124	127	209
ABHD15	10	10	26	105	56	56	32	31	68	45	13	3	37	45	56	94	46	6	55	71	56	203	59	38	56	53	47	36	78	64	68	73	75	48	74	50
ABHD2	111	183	759	1135	761	984	538	472	912	402	101	52	467	411	894	811	1819	222	859	904	1511	2087	1352	548	1312	677	553	488	804	639	993	1225	1665	942	1217	776
ABHD3	14	13	105	56	117	159	52	55	136	44	8	8	84	238	83	130	64	26	164	185	98	146	104	62	160	115	82	51	167	275	132	124	162	139	137	83
ABHD4	23	31	102	222	82	318	73	110	197	104	22	24	116	500	193	102	511	55	260	212	330	213	380	148	472	127	156	120	110	129	219	252	405	174	132	202
ABHD5	33	76	604	95	124	255	141	125	187	125	34	27	166	169	249	283	258	71	241	342	337	741	212	168	359	331	179	218	442	191	210	396	193	256	518	253
ABHD6	10	12	10	26	28	57	54	19	50	26	7	7	19	20	31	74	28	16	37	42	33	31	35	42	47	36	26	25	50	28	36	66	37	84	46	46
ABHD8	4	2	6	9	13	9	7	5	3	5	6	1	3	2	3	2	5	2	2	3	2	8	3	4	8	5	5	13	3	3	12	9	12	8	6	2
ABI1	79	138	509	427	703	809	417	442	693	415	39	46	347	521	739	552	520	283	648	747	773	1369	749	603	953	756	654	477	832	724	1024	1238	848	791	676	1058
ABI2	86	364	389	664	684	822	617	421	843	561	96	64	568	673	978	1111	828	286	841	779	898	766	930	855	1465	1213	1047	856	1166	690	927	1919	1596	1235	845	1483
ABI3	7	17	19	27	32	42	24	24	39	33	8	8	18	16	32	22	41	14	39	56	34	26	50	11	52	26	24	44	56	54	43	20	33	27	31	36
ABI3BP	64	192	121	237	226	1548	435	400	1547	255	33	40	450	97	1106	934	1524	222	1824	2422	745	669	1282	847	1245	1774	464	882	582	432	799	2053	381	1186	546	926
ABL1	48	115	91	353	238	323	168	151	294	148	70	24	144	129	217	206	373	93	260	254	367	254	308	130	286	164	176	178	235	152	265	369	269	225	202	204
ABL2	167	367	201	1205	1186	1001	416	474	868	449	143	83	696	764	904	618	1634	306	833	945	505	630	1136	798	1440	778	804	463	728	751	832	1101	1247	958	561	642
ABLIM1	114	776	251	540	597	573	1369	451	1446	730	90	89	861	1510	1263	1749	582	522	699	1050	526	1002	882	1632	788	2363	532	967	2410	781	610	4369	238	2299	1949	1712
ABLIM2	8	13	7	11	24	12	6	15	4	10	12	9	72	6	86	15	18	7	13	23	13	19	12	15	25	7	7	19	7	14	13	22	7	22	10	15
ABLIM3	38	93	101	90	126	168	413	132	288	170	24	32	166	72	270	468	169	77	214	281	325	222	225	108	65	154	76	113	341	167	248	219	351	287	104	202
ABO	1	2	6	3	2	4	4	2	0	1	0	1	9	22	4	9	4	0	6	5	5	13	5	6	0	5	0	5	5	0	2	2	3	14	8	2
ABP1	2	2	7	6	5	4	3	3	1	3	2	3	3	3	6	3	5	3	3	3	3	9	3	1	10	4	6	6	6	3	2	5	2	14	7	10
ABR	72	155	195	386	323	412	201	188	429	199	77	23	164	143	265	293	570	112	280	402	264	394	503	172	365	342	231	257	270	444	374	478	499	344	414	363
ABRA	3	6	10	16	8	8	12	6	6	9	2	6	18	4	79	19	7	17	15	15	2	8	14	15	13	31	15	13	9	12	6	7	3	21	9	12
ABT1	19	13	37	55	31	31	27	26	64	29	6	7	29	39	67	39	40	17	38	43	65	62	60	43	79	27	71	43	39	30	67	74	44	101	57	46
ABTB1	5	12	53	11	19	22	18	10	18	15	5	3	15	8	20	24	12	11	15	21	4	49	7	14	10	23	21	9	15	24	8	29	7	31	24	18
ABTB2	12	10	16	25	18	13	6	9	14	8	15	9	19	21	33	20	34	4	14	27	31	39	16	14	31	20	21	24	15	12	90	25	42	20	26	17
ACAA1	7	25	57	61	53	79	43	39	66	21	6	1	36	38	67	31	31	8	56	66	39	124	60	32	118	60	54	56	76	66	97	93	54	70	102	62
ACAA2	53	70	268	527	693	564	306	397	680	233	40	23	178	60	536	490	387	90	380	550	1098	778	624	334	753	371	431	506	765	618	653	1167	621	532	939	898
ACACA	135	198	284	817	425	471	283	251	392	240	121	97	392	877	454	419	1433	195	400	414	566	464	494	355	771	403	820	431	1115	623	666	684	1514	538	445	484
ACACB	34	241	166	92	169	96	337	78	94	145	31	28	173	36	288	1008	105	122	156	214	242	336	158	345	134	571	98	171	999	97	113	620	181	671	269	128
ACAD10	22	38	58	38	59	35	37	26	55	29	14	15	37	67	28	38	53	23	34	47	30	64	55	43	52	41	53	33	54	60	49	60	80	77	37	42
ACAD11	47	175	192	114	302	204	80	83	128	88	24	13	211	152	93	211	66	81	275	223	109	137	121	215	131	383	170	97	198	198	159	241	76	258	141	147
ACAD8	14	34	94	61	105	69	41	50	60	38	14	5	83	67	78	77	74	22	66	90	71	151	83	72	102	142	57	69	93	93	78	131	78	102	88	87
ACAD9	15	45	66	108	99	88	40	38	52	36	26	6	46	76	85	68	62	13	71	100	77	119	72	52	109	75	84	81	76	124	81	108	93	92	65	75
ACADL	1	4	3	4	4	3	15	8	3	4	4	2	9	6	23	78	16	6	7	15	20	31	3	4	14	6	7	6	57	11	8	10	10	18	9	2
ACADM	43	103	313	270	518	402	305	319	524	299	58	43	328	352	682	600	731	136	469	468	808	933	520	378	1477	434	489	622	766	825	636	996	1047	564	850	646
ACADS	3	5	8	11	12	21	25	4	6	5	1	1	9	7	4	17	6	9	19	17	11	32	8	8	16	9	19	9	23	7	14	16	12	13	16	12
ACADSB	32	68	140	118	220	177	132	88	208	89	42	15	166	157	363	313	109	60	200	171	143	215	187	199	201	237	151	192	344	138	205	473	214	302	225	292
ACADVL	78	152	253	258	323	292	159	163	276	124	47	18	240	318	309	262	305	113	313	406	244	436	222	218	335	402	201	212	274	266	203	374	253	339	356	330
ACAN	66	214	61	1403	290	214	220	731	666	180	51	42	175	54	148	99	5030	200	401	339	196	406	865	257	800	128	1176	246	53	170	8338	275	542	207	167	531
ACAP1	3	6	87	11	7	34	5	8	14	10	2	4	7	0	11	20	7	6	17	27	4	131	12	15	7	28	6	17	15	13	6	20	1	32	41	19
ACAP2	73	204	653	476	491	672	520	296	729	358	87	38	509	1744	553	850	505	229	668	760	799	1492	814	619	1022	1022	729	698	944	678	858	1370	1190	968	888	955
ACAP3	6	10	14	11	5	13	4	5	11	6	8	4	10	4	13	8	21	7	4	9	4	14	14	3	31	9	19	6	14	26	11	8	10	11	16	14
ACAT1	26	41	206	78	238	201	191	161	227	130	36	18	192	185	347	255	159	41	149	197	218	406	179	156	249	162	263	144	300	212	276	446	457	252	232	184
ACAT2	15	46	177	252	195	185	183	148	268	100	31	10	165	500	238	224	333	66	130	208	641	453	312	174	369	180	200	259	273	335	283	320	341	174	236	251
ACBD3	132	234	221	1021	642	942	392	447	868	313	91	61	457	1052	719	476	775	191	628	588	625	806	864	438	1216	587	1049	586	652	933	1355	1008	1511	639	872	1127
ACBD4	7	3	15	6	4	14	6	2	7	8	5	2	7	1	5	9	6	2	9	6	7	17	11	8	8	7	13	4	13	3	4	17	10	14	14	6
ACBD5	58	114	257	429	413	551	366	292	632	316	40	36	305	397	632	628	562	130	562	641	742	733	581	363	1112	423	534	389	614	591	727	829	634	555	503	762
ACBD6	6	48	45	247	67	98	85	56	103	73	16	17	43	150	89	78	122	21	76	63	69	98	95	61	83	67	76	80	82	61	118	109	111	86	76	97
ACBD7	5	6	8	3	12	17	12	6	5	6	6	3	7	6	17	7	7	6	7	10	10	16	7	9	10	12	10	8	6	8	13	24	15	14	21	8
ACCN1	5	9	6	4	12	10	12	14	5	11	9	8	8	5	7	3	8	7	5	3	5	4	10	5	12	5	11	7	6	17	15	18	12	15	7	7
ACCN2	6	5	9	47	22	18	13	17	14	16	15	6	7	27	12	18	44	10	14	19	33	13	25	19	17	20	33	23	24	8	52	30	21	21	18	39
ACCN3	14	7	6	10	9	6	1	5	3	3	17	1	11	3	5	5	6	2	2	3	2	2	5	2	9	5	7	10	3	6	2	4	5	12	4	1
ACCN4	2	5	3	7	4	7	3	4	5	3	9	3	4	1	8	4	3	4	3	3	4	6	4	7	12	2	6	6	6	10	6	2	6	10	3	4
ACCN5	3	2	2	0	6	5	0	2	6	2	2	2	2	1	0	2	4	0	4	2	2	4	1	3	2	1	11	3	1	3	5	0	9	9	5	2
ACCS	12	34	89	50	76	47	24	13	14	18	14	7	36	20	10	26	13	18	54	52	9	24	24	29	13	38	17	16	34	12	19	24	21	59	23	30
ACCSL	2	0	1	1	4	1	7	1	0	0	0	4	3	2	3	3	3	2	3	3	1	4	0	0	2	0	2	2	1	2	2	1	1	1	0	1
ACD	10	6	11	21	27	32	11	8	22	9	2	0	11	25	22	26	28	12	18	30	34	41	16	17	56	15	30	16	20	21	29	27	24	18	19	32
ACE	20	11	9	52	34	54	59	33	44	19	11	6	32	9	23	22	38	22	43	47	18	39	62	38	41	54	36	18	42	36	31	51	37	63	25	25
ACE2	2	3	7	3	6	9	6	5	2	2	5	6	5	7	5	15	7	2	8	5	6	7	8	6	9	10	5	2	4	16	1	7	5	15	9	6
ACER1	0	2	0	0	1	2	0	0	3	0	1	0	3	0	1	1	0	0	2	4	2	4	2	0	0	1	2	3	2	1	1	2	2	3	0	4
ACER2	5	12	27	24	17	27	25	16	18	18	6	4	24	56	21	43	15	2	28	18	19	35	14	18	36	54	9	12	67	23	16	25	13	21	41	19
ACER3	32	39	168	148	315	280	185	167	300	110	52	14	139	132	343	188	110	88	326	318	346	387	265	249	499	276	211	149	323	246	309	485	538	265	226	301
ACHE	5	8	34	9	7	8	10	6	4	7	6	7	8	6	7	8	4	2	6	15	2	30	4	7	8	13	8	21	3	7	5	10	2	8	4	6
ACIN1	231	480	704	906	806	764	358	348	539	303	643	78	456	507	431	484	676	264	676	556	445	900	562	497	1013	710	662	518	655	820	663	741	824	827	579	653
ACLY	58	109	240	399	384	609	260	259	509	199	46	35	251	571	497	282	1055	132	441	607	668	872	795	294	748	301	792	402	874	600	1362	647	1030	432	634	755
ACMSD	2	2	4	1	0	5	2	2	3	0	4	2	2	1	3	2	4	2	4	4	2	1	1	5	4	6	2	7	2	0	4	1	2	4	2	2
ACN9	11	11	43	50	34	56	35	45	61	38	13	12	39	104	67	37	67	12	26	54	152	117	37	43	163	24	138	136	88	133	110	120	163	58	106	119
ACO1	45	108	121	534	299	478	273	224	322	152	75	25	197	388	342	495	246	114	330	426	481	311	376	289	519	233	333	281	711	273	513	644	665	397	353	335
ACO2	5	40	79	183	187	140	74	102	110	58	20	10	95	92	181	102	180	48	122	92	112	162	128	102	229	98	130	131	117	94	127	255	263	111	159	121
ACOT1	0	0	2	0	0	1	1	1	3	0	0	1	0	0	1	0	1	0	1	3	1	0	0	0	1	0	0	0	0	2	0	4	1	2	0	1
ACOT11	4	26	13	27	17	15	5	12	7	9	11	5	12	5	13	9	24	11	10	12	2	10	26	17	87	20	24	4	8	22	8	25	37	23	12	17
ACOT12	2	1	3	0	4	2	2	2	0	4	0	2	2	2	2	6	6	2	3	0	0	4	1	2	4	4	3	5	4	1	5	1	0	3	2	1
ACOT13	55	79	175	490	281	404	250	392	579	213	75	34	285	997	444	330	467	106	476	572	1596	494	647	232	1379	289	772	583	448	638	826	570	809	371	485	843
ACOT2	3	3	1	10	6	3	1	3	4	2	3	1	5	3	8	5	5	0	3	5	9	4	3	3	6	6	8	7	9	5	6	8	5	4	2	3
ACOT4	4	3	3	20	5	17	8	3	10	6	3	2	1	2	5	12	8	1	9	2	11	3	8	5	16	2	9	10	6	6	16	11	14	3	5	4
ACOT6	1	0	1	3	2	2	0	1	2	1	0	0	1	0	5	3	8	3	3	2	1	1	0	2	3	3	3	3	4	7	3	0	2	1	2	2
ACOT7	9	8	16	51	33	99	28	32	55	25	6	7	21	71	36	23	98	18	45	59	159	80	106	21	213	30	57	53	28	55	113	34	121	18	44	82
ACOT8	9	7	18	40	10	13	9	13	20	7	6	1	15	20	14	19	34	2	23	20	25	13	26	20	37	21	12	19	20	16	21	59	49	25	19	26
ACOT9	20	52	65	77	147	211	89	125	197	58	23	2	79	84	133	97	135	25	133	120	289	137	133	63	238	80	107	84	98	108	193	145	122	114	85	167
ACOX1	67	106	282	420	360	497	367	222	510	292	68	29	264	353	436	534	837	125	382	438	630	703	594	357	644	374	842	645	691	500	777	715	1007	516	515	606
ACOX2	6	28	9	10	18	30	26	16	51	14	3	4	15	0	39	31	11	17	17	34	11	33	31	27	15	24	18	16	51	10	9	77	14	42	17	44
ACOX3	5	17	20	58	41	37	19	19	37	18	11	6	32	56	31	35	47	14	29	41	37	54	29	39	43	36	33	29	48	35	35	53	38	79	29	47
ACOXL	3	4	8	2	10	14	3	2	3	4	5	3	3	2	1	0	2	5	2	4	3	9	2	4	7	6	6	3	3	5	3	6	8	4	1	3
ACP1	31	52	374	410	272	352	196	188	334	160	43	23	126	333	307	235	127	88	223	239	443	644	228	174	374	235	325	362	299	264	413	394	519	245	339	411
ACP2	6	19	21	80	86	112	38	42	83	38	9	4	27	43	46	23	71	33	61	70	52	40	87	24	100	42	23	51	57	69	94	47	100	39	45	66
ACP5	27	103	31	236	1117	83	100	361	247	56	43	30	196	35	668	53	95	114	168	167	37	180	278	666	1519	466	228	240	333	236	451	2133	1438	319	97	532
ACP6	7	15	14	36	26	41	10	9	13	21	8	3	42	32	21	20	42	7	29	20	103	67	18	18	65	25	25	16	36	47	32	45	45	33	22	25
ACPL2	8	34	45	91	79	57	45	23	110	39	12	9	35	40	35	59	179	14	69	61	83	74	82	66	111	106	108	83	90	145	229	134	143	81	203	128
ACPP	9	7	156	42	35	40	27	32	67	20	8	8	16	19	53	47	105	9	55	74	42	262	51	31	42	29	60	30	37	46	64	36	48	55	140	32
ACPT	3	2	2	2	1	2	2	5	2	1	4	1	1	2	3	0	1	2	0	1	3	4	1	2	0	7	0	3	3	6	3	4	0	2	1	2
ACR	3	3	4	2	2	3	6	1	9	6	3	2	0	2	1	2	0	3	1	3	0	5	3	1	3	3	4	2	3	3	1	2	6	5	0	1
ACRBP	12	3	25	10	11	19	15	5	31	10	5	4	14	6	19	13	5	3	8	22	9	32	19	4	13	15	6	9	19	10	21	18	9	14	21	7
ACRC	18	25	33	12	33	19	8	6	18	9	11	2	23	15	20	20	11	12	53	28	6	39	34	22	26	52	34	27	23	31	9	40	29	34	27	27
ACRV1	0	1	11	16	5	4	4	7	1	6	4	2	1	2	2	3	0	1	0	4	7	5	2	3	14	5	2	5	4	6	3	6	11	6	3	2
ACSBG1	2	8	16	11	4	3	5	7	12	13	6	4	9	5	5	20	2	4	4	6	6	19	4	9	3	10	10	3	12	6	10	13	10	4	3	5
ACSBG2	3	7	4	11	11	6	4	6	12	5	13	5	7	9	11	7	13	4	8	7	3	5	8	6	5	9	16	13	7	13	3	6	11	11	4	1
ACSF2	4	16	12	18	33	17	14	12	30	8	6	4	9	15	16	21	44	17	30	21	33	22	20	19	54	30	25	26	26	20	23	54	30	37	26	18
ACSF3	8	12	32	39	28	26	14	16	26	10	6	8	8	17	14	26	16	4	30	24	16	48	21	18	22	21	22	15	33	20	23	31	27	35	24	36
ACSL1	65	69	535	375	332	511	324	218	410	231	41	32	331	83	745	1204	425	82	482	683	622	1062	374	183	271	404	171	453	2089	465	365	578	532	557	781	280
ACSL3	59	107	261	485	532	723	398	375	771	300	44	41	393	872	653	515	901	154	537	674	1047	636	1013	449	660	508	507	401	714	511	975	1062	1520	635	642	660
ACSL4	75	122	241	522	584	833	277	299	676	312	86	49	347	499	909	401	335	131	602	678	984	566	719	470	825	464	547	436	617	638	750	912	1199	579	482	609
ACSL5	26	36	167	31	101	160	195	77	155	124	16	7	72	23	169	249	75	28	206	194	105	333	134	115	127	186	38	68	307	124	224	183	143	263	199	78
ACSL6	6	9	558	6	15	22	9	12	19	14	10	8	20	11	26	20	4	13	15	16	7	813	9	23	2	145	10	44	64	14	20	16	0	75	198	20
ACSM1	2	0	19	3	3	3	2	7	3	1	2	4	4	1	4	2	5	1	0	5	4	42	1	23	6	6	4	2	1	2	3	2	1	13	9	0
ACSM2A	3	3	2	3	9	7	10	7	4	4	4	1	1	2	5	2	2	2	5	4	7	6	2	2	2	2	4	4	4	8	2	3	2	3	2	5
ACSM2B	1	0	1	0	4	2	2	3	0	5	1	0	0	1	1	7	1	0	2	2	1	2	0	2	1	0	3	2	0	1	1	3	0	3	1	1
ACSM3	6	5	44	32	22	18	12	10	18	6	8	4	11	11	22	23	18	3	29	10	29	116	13	32	15	48	23	23	15	12	30	35	33	31	36	28
ACSM4	1	5	3	5	10	1	2	0	5	3	2	4	3	4	2	2	4	2	9	9	2	3	10	5	4	3	8	3	4	5	7	3	10	14	2	6
ACSM5	4	4	4	13	19	26	13	7	15	17	12	2	4	3	8	26	3	3	14	22	19	12	13	7	6	4	7	17	25	16	20	13	39	24	7	20
ACSS1	9	54	120	90	167	84	32	41	65	53	24	9	56	21	46	52	83	22	64	78	20	311	77	64	92	111	117	80	90	109	65	93	128	126	112	71
ACSS2	10	36	52	109	114	76	51	54	38	45	12	6	68	34	63	71	76	26	97	72	54	83	55	43	70	47	44	50	178	41	45	72	122	64	37	78
ACSS3	16	38	30	22	26	45	64	50	49	49	11	12	59	20	115	223	91	34	63	52	82	59	42	81	50	83	83	133	177	42	81	183	125	117	91	106
ACTA1	3	5	7	73	26	4	5	5	2	7	3	0	599	19	1365	707	35	24	45	27	25	47	24	28	4	2	16	1927	23	3	8	9	4	5	4	6
ACTA2	318	1330	379	922	912	8681	2436	1756	5916	3696	229	206	1583	498	3262	1046	2597	1130	3547	7328	5086	1183	8210	1440	951	983	392	454	1566	1645	1836	4494	585	2183	3098	3243
ACTB	1044	1926	6829	7189	7355	16720	5378	5571	11158	5827	746	557	3702	3874	7177	4512	10595	2708	8082	11566	11640	17861	12712	4271	10745	4268	7088	6528	7324	7623	11777	10021	10922	6364	9661	10799
ACTBL2	13	3	3	5	7	13	3	8	6	12	8	5	5	6	5	8	8	6	6	5	5	8	10	3	7	2	6	10	6	5	7	8	5	2	3	10
ACTC1	8	2	9	112	11	38	6	8	17	14	5	6	450	9	367	7	20	14	20	27	31	32	20	11	93	6	12	187	4	33	12	9	7	12	10	19
ACTG1	244	573	1223	2851	1572	4542	1553	2124	3540	1643	282	161	1542	2783	2665	1368	3469	772	2136	2932	4239	4323	3446	1497	2964	1287	2212	1755	2263	2559	4279	3589	5174	1781	2559	4016
ACTG2	60	151	27	41	47	1552	134	84	372	329	36	18	220	39	333	56	144	118	372	1143	2626	124	500	112	93	4	3	28	7	114	170	68	53	89	135	124
ACTL6A	26	45	233	218	182	331	148	199	273	163	17	16	261	1038	291	230	322	65	263	230	760	532	320	176	518	191	622	388	244	304	413	372	587	267	284	410
ACTL6B	1	2	1	5	4	5	3	2	1	0	1	1	2	1	2	2	2	1	1	3	2	3	1	1	1	0	2	2	1	3	3	0	0	0	1	1
ACTL7A	0	3	1	2	4	3	5	1	0	2	2	0	3	1	3	4	1	1	2	2	1	3	2	2	3	1	2	3	0	1	0	1	1	6	1	3
ACTL7B	2	3	3	5	1	4	1	4	0	2	2	0	2	2	2	1	0	0	4	1	1	0	2	1	2	1	2	2	0	2	4	1	0	2	2	1
ACTL8	3	3	3	2	5	6	3	1	1	4	1	2	0	1	3	2	8	1	2	0	2	2	1	3	2	1	18	6	4	3	4	4	2	2	1	0
ACTL9	1	0	5	2	2	4	4	4	2	2	2	5	2	1	2	4	2	0	6	1	1	2	1	1	2	3	1	4	4	0	6	4	1	4	2	3
ACTN1	90	263	501	1135	568	1335	419	482	925	531	141	48	398	379	624	351	1064	231	664	1024	1702	1209	1241	509	1457	464	475	290	526	659	622	1042	1198	538	719	656
ACTN2	9	59	8	81	108	21	13	23	9	17	40	7	625	18	646	115	26	24	35	22	8	35	43	80	31	59	29	373	15	23	43	40	26	40	13	27
ACTN3	3	1	3	6	8	3	3	7	3	9	5	1	62	1	2	6	0	1	1	3	3	10	4	1	6	4	7	30	7	3	3	3	2	2	1	5
ACTN4	89	278	344	562	412	1008	614	434	1066	786	134	36	363	551	664	544	1080	291	597	882	1036	873	1034	422	854	556	502	316	662	613	769	1043	446	792	748	826
ACTR10	34	44	156	365	180	301	205	182	274	142	22	21	189	298	272	229	184	61	206	218	314	408	274	139	845	215	187	232	291	282	439	405	463	294	306	403
ACTR1A	56	97	219	434	370	481	195	225	469	211	31	27	185	237	298	224	308	79	275	445	439	553	490	163	600	295	266	223	379	348	472	568	446	299	436	554
ACTR1B	16	16	73	149	117	185	85	108	139	104	21	8	79	134	140	115	168	28	102	145	178	241	127	109	210	111	134	101	127	98	116	209	144	156	131	154
ACTR2	229	376	1861	1375	1979	2831	1550	1647	3559	1271	174	134	1147	1812	2178	1434	1917	448	2294	2853	2922	5454	3184	1511	3919	1665	2369	1869	2844	3127	3678	3964	4776	2124	3419	4017
ACTR3	174	415	2100	1127	1075	2612	1363	1500	3238	1471	192	159	1380	2071	2402	1651	2372	582	2246	3402	3868	5942	3782	1319	4478	1834	2243	2000	2507	3127	3424	3047	3895	2329	3296	3354
ACTR3B	13	18	27	62	26	21	19	10	26	14	13	6	17	35	21	41	66	10	21	27	13	46	20	15	39	35	55	21	40	19	40	76	45	33	23	19
ACTR3BP2	2	2	4	4	4	3	1	2	4	2	1	4	2	2	1	2	3	3	1	4	3	1	0	4	7	1	9	6	5	2	5	3	2	7	3	4
ACTR3C	1	0	3	2	3	4	2	1	0	3	1	3	1	0	2	2	2	0	0	2	0	3	2	3	0	0	0	1	1	3	0	0	4	4	3	2
ACTR5	2	25	17	68	49	30	12	16	30	21	19	2	22	21	23	33	16	9	39	40	19	38	23	14	38	42	30	19	32	30	24	32	40	60	26	20
ACTR6	3	11	41	58	49	43	36	23	40	33	11	8	33	88	88	64	61	17	74	71	70	114	65	46	167	50	109	68	80	89	70	119	80	68	90	84
ACTR8	33	44	115	187	154	173	80	81	159	67	34	9	110	113	148	149	151	51	132	177	117	222	218	111	185	156	181	162	162	217	183	226	209	171	186	235
ACTRT1	1	1	2	1	3	1	5	5	1	0	1	3	2	3	0	2	2	1	1	1	3	1	1	0	3	4	3	1	4	1	6	2	0	2	2	4
ACTRT2	5	1	1	3	2	4	5	1	1	1	1	1	1	3	2	0	0	3	2	5	3	2	1	1	4	3	7	2	4	0	0	2	0	4	1	5
ACVR1	25	70	60	423	218	323	141	164	318	120	32	30	169	214	328	296	286	76	255	268	365	156	362	222	635	253	296	209	278	366	336	587	559	373	283	340
ACVR1B	27	58	115	193	109	177	119	94	202	82	18	15	111	175	189	202	239	48	127	234	161	252	253	133	180	192	149	119	192	98	145	285	174	213	176	135
ACVR1C	24	19	70	37	33	40	165	40	30	77	28	20	73	61	106	596	58	38	46	78	464	165	39	49	86	63	104	85	584	227	70	168	191	71	144	38
ACVR2A	56	136	91	134	162	628	222	106	244	159	32	21	148	183	245	360	271	130	309	280	238	186	306	256	373	306	209	272	298	188	231	425	306	359	286	363
ACVR2B	36	104	102	308	202	139	154	90	152	116	43	36	163	229	177	393	166	82	165	195	90	170	206	265	496	286	165	158	271	175	172	390	156	357	176	169
ACVRL1	23	44	52	205	85	209	163	135	227	161	23	11	100	37	144	98	97	48	175	268	116	78	116	77	60	67	68	32	213	91	152	170	117	180	124	260
ACY1	1	18	14	49	26	33	33	17	49	17	5	8	23	47	48	25	24	6	37	47	33	33	35	11	37	13	47	44	46	35	69	62	62	32	19	48
ACY3	0	0	2	4	5	1	0	1	0	0	2	0	2	0	1	1	1	1	0	3	4	0	1	1	1	1	2	5	2	1	3	2	7	3	3	4
ACYP1	10	4	71	35	106	75	27	22	43	26	16	9	35	72	52	47	45	16	45	42	92	152	55	28	201	60	55	35	34	117	31	76	80	85	51	55
ACYP2	10	15	26	43	29	48	39	50	85	44	8	5	29	29	129	60	81	6	69	77	111	54	85	50	184	50	76	160	71	83	163	127	160	63	105	110
ADA	7	15	29	47	48	51	13	27	33	26	11	5	23	25	28	18	25	8	29	41	52	51	44	12	36	15	35	35	26	41	45	33	37	32	36	22
ADAD1	5	3	5	6	4	6	6	5	1	9	6	10	8	5	4	1	7	3	3	6	2	5	2	3	7	6	7	4	8	4	10	3	5	4	6	3
ADAD2	1	4	4	1	1	6	3	8	2	3	7	7	0	2	6	4	4	5	6	0	4	5	2	6	3	5	3	2	4	6	2	5	3	4	5	7
ADAL	11	20	78	47	70	63	61	71	99	43	23	9	53	40	76	51	52	29	79	44	165	129	55	41	126	51	91	50	82	48	101	157	206	97	95	108
ADAM1	1	10	44	31	41	13	13	9	22	12	6	8	57	71	10	38	12	17	27	12	7	31	33	47	12	44	26	21	35	19	24	42	33	68	34	14
ADAM10	100	315	672	766	956	1253	618	698	1538	631	143	87	687	1068	1245	1211	1581	349	1144	1422	1542	1569	1600	924	3565	1305	1963	1028	1257	1656	1107	2148	1831	1566	1413	1264
ADAM11	4	5	5	6	4	6	7	6	1	6	5	7	5	4	9	4	9	1	6	7	1	7	7	3	12	6	11	4	3	8	7	8	4	3	6	6
ADAM12	122	292	153	555	500	6738	279	833	1256	243	140	99	553	3410	337	212	1414	375	1353	1901	2648	574	3261	827	660	510	393	351	445	301	1650	1722	959	275	1384	1823
ADAM15	9	21	41	66	48	70	72	62	83	66	9	10	48	96	109	36	111	22	71	83	72	72	78	38	202	44	73	45	79	78	57	99	99	77	50	58
ADAM17	31	169	194	410	431	439	263	199	464	247	69	35	348	1334	373	414	299	141	423	512	482	507	454	336	1074	360	396	289	391	498	387	735	639	575	336	393
ADAM18	3	6	5	5	6	4	10	9	4	6	12	2	4	3	3	9	1	9	3	4	7	5	5	4	10	4	8	2	5	92	10	3	6	6	5	7
ADAM19	50	163	148	301	211	490	118	108	239	111	59	12	88	69	82	90	190	104	156	324	660	284	428	112	319	118	142	77	129	248	178	193	284	118	260	163
ADAM2	2	3	4	0	1	7	2	4	2	3	5	3	5	2	2	3	1	3	3	5	2	4	3	1	7	3	6	3	5	11	1	5	2	5	2	4
ADAM20	9	13	12	8	20	13	15	11	8	6	7	3	10	3	9	35	6	5	13	14	8	12	19	15	16	29	9	12	10	5	12	17	13	29	8	7
ADAM21	0	1	4	13	6	5	3	4	5	3	1	2	2	2	1	2	2	4	5	1	4	12	0	8	1	14	4	6	5	3	7	9	9	13	2	6
ADAM21P1	1	4	1	2	1	0	3	2	2	3	0	1	1	0	1	0	0	2	1	2	0	0	3	2	2	1	0	5	0	4	0	2	2	1	1	2
ADAM22	11	32	30	43	59	19	42	21	95	37	22	6	75	13	100	150	240	34	86	47	24	60	65	109	335	182	126	112	126	141	45	322	231	178	141	81
ADAM23	7	12	11	12	12	43	5	9	38	9	4	4	192	1723	48	39	64	40	40	52	59	303	47	94	22	23	10	38	10	33	43	42	4	27	33	39
ADAM28	33	34	89	71	111	180	55	42	178	42	10	15	57	32	53	50	49	58	125	156	108	95	107	84	234	127	66	56	85	199	92	83	65	119	64	50
ADAM29	8	2	9	8	14	8	8	3	8	7	11	7	8	3	4	3	12	4	13	7	4	11	7	4	7	4	8	9	5	7	6	10	16	11	4	10
ADAM30	5	7	5	13	6	5	4	6	4	8	6	2	4	4	10	4	18	8	1	2	3	5	9	6	6	5	9	4	10	6	11	9	7	4	1	8
ADAM32	12	46	20	24	23	70	46	31	42	40	4	2	34	19	95	79	159	26	26	40	33	35	39	35	50	50	165	75	62	58	124	91	65	45	75	122
ADAM33	5	3	10	13	3	23	5	4	10	7	2	2	28	4	9	9	14	3	11	3	2	9	14	10	4	3	12	7	8	11	12	11	4	8	8	11
ADAM3A	3	2	4	4	3	4	5	5	3	3	4	1	2	3	2	1	3	0	6	2	2	7	1	3	7	6	10	6	5	8	2	3	3	1	6	3
ADAM5P	0	2	3	1	1	4	5	0	4	1	3	2	1	0	2	0	3	2	1	0	0	3	3	0	1	0	1	1	1	2	2	1	3	0	1	1
ADAM6	2	0	2	3	1	5	3	0	4	3	2	0	2	0	1	2	2	5	3	4	3	4	1	3	1	1	1	7	3	0	4	4	2	1	2	1
ADAM7	4	2	6	3	4	3	3	3	3	2	4	1	2	1	4	1	1	3	2	3	2	0	4	2	1	1	2	2	1	2	4	4	2	3	7	0
ADAM8	3	8	86	23	20	33	16	18	27	15	5	4	16	3	35	31	11	8	6	28	22	84	14	19	184	21	7	19	13	12	15	10	17	29	42	12
ADAM9	155	199	403	848	912	2171	685	809	2751	623	94	93	1080	6225	1113	781	1352	293	1971	2805	1752	831	2494	677	2982	702	1087	678	963	2699	1882	1391	2044	1017	1134	1359
ADAMDEC1	19	8	37	24	81	417	21	27	419	61	14	15	23	71	49	8	10	17	23	148	24	28	66	23	376	18	82	39	66	210	36	10	31	44	23	19
ADAMTS1	126	351	185	1551	1544	1824	314	344	676	271	122	68	1091	526	2169	2961	886	292	936	1949	512	408	900	386	1307	891	358	345	471	375	674	422	798	1117	871	236
ADAMTS10	13	25	13	30	27	12	9	10	16	8	26	9	20	9	15	10	24	10	16	24	8	19	19	40	53	32	23	18	22	21	13	32	29	32	11	23
ADAMTS12	26	46	23	216	64	759	88	119	130	34	22	13	47	38	31	40	165	32	191	215	283	52	325	57	128	34	79	22	31	88	160	115	85	30	95	171
ADAMTS13	6	12	12	1	20	10	6	9	5	5	5	4	4	8	10	7	11	11	7	13	2	12	4	9	8	6	15	3	15	8	9	5	11	13	8	10
ADAMTS14	12	14	12	22	20	40	5	15	13	12	11	8	27	8	9	17	16	11	33	55	42	16	51	16	16	9	10	10	12	9	19	15	11	13	15	16
ADAMTS15	15	10	10	11	11	13	21	14	7	14	5	2	12	11	18	22	6	9	9	16	14	9	7	15	18	8	7	14	17	16	9	8	4	13	11	11
ADAMTS16	26	4	9	15	8	39	12	9	5	15	17	9	11	7	8	13	9	5	17	13	204	13	24	9	13	9	21	10	8	7	20	11	32	11	10	6
ADAMTS17	24	46	25	24	28	24	43	19	60	29	18	23	35	7	25	37	68	48	28	29	13	55	28	55	64	65	45	42	48	18	52	169	24	137	97	80
ADAMTS18	26	24	20	208	47	51	47	37	67	60	26	17	83	17	40	41	145	36	128	147	37	51	99	41	40	21	160	134	63	33	67	29	14	52	189	169
ADAMTS19	10	9	7	6	12	9	10	11	7	12	16	9	9	7	8	10	14	7	3	4	5	11	9	2	15	10	13	10	7	21	13	9	7	10	7	6
ADAMTS2	68	242	85	678	378	1777	364	452	962	300	99	54	212	59	246	101	607	238	515	647	820	345	1573	293	366	418	525	291	356	304	418	594	2118	550	828	464
ADAMTS20	2	8	4	6	9	8	12	10	5	9	10	7	8	4	6	9	8	4	9	10	6	14	11	8	12	5	5	6	10	8	8	7	4	8	0	11
ADAMTS3	9	15	59	40	21	75	25	28	51	17	11	5	40	17	57	15	420	29	41	43	32	95	47	43	148	36	89	51	26	71	144	39	79	37	59	49
ADAMTS4	16	28	20	259	96	109	35	44	58	25	17	10	37	11	46	41	76	12	48	79	34	13	51	20	46	15	35	20	17	32	71	21	78	16	22	38
ADAMTS5	64	88	67	513	217	1359	191	129	218	151	80	58	157	68	345	366	252	126	390	634	710	246	569	288	626	277	428	360	748	210	444	594	834	286	347	314
ADAMTS6	43	83	31	66	266	377	70	124	105	51	70	23	115	35	123	110	200	63	211	392	190	69	230	130	258	218	81	75	129	534	471	169	88	174	149	122
ADAMTS7	7	12	10	29	11	25	15	18	22	20	19	9	14	7	9	5	23	6	18	25	14	23	23	10	29	8	15	17	15	18	18	19	27	16	22	30
ADAMTS8	9	4	7	11	15	14	15	5	9	7	6	8	10	6	7	8	6	6	9	14	4	16	11	7	10	6	8	4	15	7	9	11	8	10	14	11
ADAMTS9	138	1206	187	732	691	489	762	357	1617	628	443	112	802	112	607	644	336	1043	1473	1167	313	639	856	2122	536	1854	418	813	1659	353	1060	4518	406	1915	1475	2980
ADAMTSL1	30	35	38	27	96	232	26	91	114	43	28	20	46	23	79	32	54	29	109	276	101	53	227	34	17	67	36	78	54	40	135	54	51	41	36	34
ADAMTSL2	7	4	11	6	9	9	11	13	12	12	10	9	12	5	7	12	7	9	13	7	4	12	3	15	25	11	11	17	10	6	15	18	11	13	8	4
ADAMTSL3	13	12	40	60	34	232	158	61	39	31	20	10	58	16	245	283	31	24	31	52	88	200	34	18	25	44	65	123	116	57	52	81	24	57	37	93
ADAMTSL4	22	16	20	44	25	61	15	16	27	26	18	16	45	55	19	27	27	13	50	71	38	48	32	30	36	23	22	21	32	27	57	21	19	44	27	26
ADAMTSL5	4	5	11	21	2	20	3	6	6	6	3	3	9	23	5	4	7	1	6	8	7	8	4	7	11	5	5	8	5	5	11	3	1	6	6	7
ADAP1	2	8	5	5	6	13	1	6	6	7	5	2	5	3	1	4	7	4	7	7	8	9	3	8	6	4	9	2	4	3	14	3	4	6	5	10
ADAP2	51	36	81	198	120	244	94	65	265	88	14	22	43	58	96	79	189	28	272	263	220	126	259	48	195	43	137	100	178	297	379	192	236	170	109	221
ADAR	288	446	1121	2007	1148	1690	903	683	1886	827	274	126	898	1336	1525	1465	2940	443	1625	1443	3380	2371	1890	1002	3915	1290	1810	1549	1350	2449	1747	2153	3044	1932	1622	1395
ADARB1	63	375	90	534	283	383	390	235	336	218	71	37	207	81	466	564	377	211	398	328	164	387	351	538	539	704	325	260	461	212	233	806	221	917	202	497
ADARB2	6	10	14	3	12	5	5	7	11	6	4	8	10	2	10	2	8	6	5	9	3	6	5	10	11	3	10	6	10	8	5	12	8	8	7	11
ADAT1	8	29	51	70	77	103	43	27	64	45	17	12	50	65	53	55	43	30	60	66	100	96	75	46	77	58	78	39	70	41	108	98	100	69	55	70
ADAT2	30	50	129	133	79	55	53	36	57	45	30	16	99	111	57	74	70	33	124	92	66	125	74	102	83	101	91	57	92	64	65	86	85	102	62	76
ADAT3	1	3	4	5	6	1	4	6	0	8	1	2	1	10	3	1	6	1	1	5	4	5	0	1	13	3	4	6	2	6	3	2	3	7	2	3
ADC	3	7	5	15	15	26	10	9	5	14	5	3	23	4	26	17	8	4	16	14	18	15	8	17	24	42	13	17	7	15	20	54	13	43	11	18
ADCK1	4	3	21	18	16	27	13	7	19	7	3	5	11	8	7	5	18	6	12	15	16	28	11	16	22	14	9	10	19	21	24	15	31	14	6	7
ADCK2	8	7	40	51	33	64	31	32	57	25	11	7	15	20	29	31	60	4	45	46	58	48	39	13	91	33	45	30	29	43	58	61	56	24	41	30
ADCK3	9	17	84	166	143	79	64	58	69	42	11	8	157	100	171	90	73	19	66	71	60	128	66	90	88	99	99	110	86	66	82	132	92	121	54	51
ADCK4	4	6	13	11	9	13	4	5	10	3	6	2	2	15	10	6	8	6	13	13	7	18	14	7	13	11	7	12	7	7	13	19	13	16	16	16
ADCK5	1	5	2	3	8	12	0	7	3	5	3	1	4	2	8	2	8	4	1	3	4	7	7	0	8	6	4	3	2	13	3	12	6	15	7	6
ADCY1	23	29	33	84	34	72	87	37	57	57	31	17	49	24	64	46	112	37	105	63	41	54	65	57	49	65	84	65	72	50	58	83	56	66	63	72
ADCY10	4	18	14	8	14	10	7	7	2	6	9	8	10	4	7	7	12	7	14	5	13	10	5	15	16	12	9	5	14	7	8	14	5	5	7	9
ADCY2	17	29	16	51	19	12	14	19	42	39	4	8	69	4	48	37	98	23	20	32	78	46	55	25	14	14	71	53	28	16	199	31	25	21	50	28
ADCY3	21	55	102	272	249	186	83	65	153	55	60	13	118	156	134	63	213	47	121	115	104	161	134	91	258	105	141	110	78	120	188	179	299	126	123	128
ADCY4	18	112	48	31	97	106	54	36	48	52	43	10	95	17	68	70	36	42	102	151	29	60	55	87	17	105	12	24	76	32	35	40	21	116	64	33
ADCY5	1	6	3	6	8	8	5	8	2	3	1	6	9	4	8	13	15	4	2	9	4	18	6	4	3	6	4	14	10	7	11	10	9	12	11	7
ADCY6	17	81	62	98	82	59	86	72	116	83	33	24	64	54	67	100	91	42	83	76	84	83	100	74	121	92	87	137	138	80	82	157	109	164	118	106
ADCY7	30	53	260	208	188	462	107	123	333	126	25	14	99	124	117	174	229	56	250	323	356	343	348	151	171	191	113	128	227	260	249	246	259	223	261	156
ADCY8	8	3	4	5	10	6	6	8	4	6	1	8	1	15	8	2	12	1	4	6	6	10	7	5	15	4	9	10	3	4	9	7	2	8	10	4
ADCY9	33	53	36	121	145	102	77	59	88	78	30	20	107	129	121	125	169	37	131	116	70	117	146	95	148	142	118	103	126	92	94	251	142	192	104	138
ADCYAP1	9	7	10	9	43	81	80	16	108	17	15	7	34	11	436	64	21	13	64	13	49	27	45	36	12	9	9	24	18	5	85	24	10	31	27	25
ADCYAP1R1	2	1	2	38	3	3	5	3	1	4	2	1	9	0	3	2	2	1	2	4	4	2	5	4	14	1	15	2	6	1	2	7	3	3	2	1
ADD1	71	173	566	563	401	529	454	259	582	325	78	50	279	335	460	514	460	162	410	477	390	1079	486	305	651	534	419	400	620	609	565	780	574	749	555	616
ADD2	17	35	977	9	52	44	20	25	39	32	16	13	61	277	60	23	22	27	18	48	14	1305	22	35	15	244	68	64	79	34	18	33	10	82	250	23
ADD3	220	456	1380	526	1076	2349	1554	803	2146	1290	125	109	741	675	1815	2091	995	445	1579	1703	2259	3426	1927	1409	1251	1615	836	1212	2246	1328	1690	2774	1268	2169	2333	2456
ADH1A	0	2	0	0	2	3	1	1	1	0	0	0	2	0	3	3	1	8	1	4	4	5	4	2	3	4	2	1	5	0	1	5	2	2	2	3
ADH1B	13	19	100	8	8	11	343	83	5	67	9	7	44	31	199	2713	73	46	52	149	1059	472	44	50	10	19	27	212	1922	6	8	273	7	55	505	7
ADH1C	3	0	7	2	9	1	13	3	1	6	0	1	5	2	17	44	0	2	4	2	7	8	1	9	3	16	0	33	32	2	7	24	6	9	9	2
ADH4	10	8	7	12	9	5	6	11	7	12	12	8	7	6	6	8	5	17	8	7	2	11	9	13	8	7	8	15	6	13	5	7	10	10	6	9
ADH5	53	65	176	566	313	681	342	312	454	227	32	34	265	922	497	426	252	78	382	371	884	526	540	259	562	194	360	422	452	364	591	772	984	418	366	537
ADH6	2	6	6	1	9	6	11	5	5	4	6	7	10	10	10	17	5	5	10	4	9	5	8	12	16	16	9	2	13	11	9	14	18	22	2	12
ADH7	6	5	5	1	3	3	4	4	1	1	4	6	135	1238	19	22	27	16	26	16	14	29	26	17	3	7	7	4	5	3	6	3	1	4	2	3
ADHFE1	1	12	19	10	11	8	13	7	8	2	6	3	23	46	23	83	12	12	12	22	17	20	10	24	9	33	5	19	27	10	20	27	6	44	18	13
ADI1	35	37	197	332	259	306	182	172	488	188	26	26	153	395	400	181	171	47	275	333	266	358	353	115	316	151	342	437	306	450	418	458	470	241	294	274
ADIG	2	2	2	4	2	0	2	4	0	3	1	3	2	1	1	1	0	0	1	5	1	3	1	0	2	1	2	0	2	1	4	2	1	0	2	1
ADIPOQ	46	32	376	44	59	46	2349	418	47	380	48	58	296	201	979	9853	308	240	240	613	5879	2330	315	260	46	48	53	894	6599	38	41	1229	27	301	2619	41
ADIPOR1	77	134	1065	934	506	784	338	555	981	551	65	46	391	1069	759	598	1073	169	611	718	619	2485	807	481	1367	640	570	703	1272	582	773	904	1058	697	1034	928
ADIPOR2	34	70	301	150	170	224	201	117	244	122	43	19	119	204	249	269	218	77	204	246	559	537	235	171	556	221	319	185	402	221	201	357	290	317	282	208
ADK	14	54	103	147	168	139	143	179	212	105	22	13	109	236	292	209	101	106	173	170	266	218	237	167	347	269	255	258	266	271	333	445	239	238	311	479
ADM	8	15	38	262	63	163	64	45	64	74	17	15	61	493	86	57	81	21	59	96	220	51	33	40	728	46	55	47	67	43	200	32	100	36	36	156
ADM2	9	6	12	21	19	18	4	13	18	12	5	6	9	18	12	7	18	9	18	24	21	23	20	5	15	12	21	9	13	20	8	18	7	7	17	7
ADNP	159	426	556	1497	1081	921	625	409	925	483	261	71	549	1013	882	1086	1310	363	1083	825	955	1455	1029	765	1255	1071	1007	818	886	811	1031	1423	1521	1175	960	1027
ADNP2	18	59	130	146	126	188	90	72	174	106	25	23	65	124	143	172	192	37	123	118	191	219	155	94	216	109	215	118	166	157	156	152	234	168	157	183
ADO	12	25	73	95	64	147	121	93	206	99	14	13	84	292	116	135	98	39	125	187	193	167	155	95	242	116	129	96	153	124	199	223	182	128	158	202
ADORA1	6	4	7	7	8	13	10	5	5	8	5	3	3	2	6	2	6	4	1	5	3	14	10	5	5	4	4	9	9	3	5	6	2	3	8	4
ADORA2A	5	9	29	24	22	12	12	21	5	19	3	6	7	1	8	10	15	4	11	11	3	45	11	7	17	4	9	13	21	15	39	15	10	26	29	16
ADORA2B	7	7	23	80	26	7	12	23	17	11	5	2	26	97	8	17	88	10	11	21	43	20	39	21	115	22	42	13	28	24	30	25	39	24	23	20
ADORA3	24	22	40	127	149	261	34	56	272	43	13	7	18	30	75	14	219	25	306	240	183	86	237	33	231	39	105	70	45	199	240	66	303	161	35	153
ADPGK	32	89	260	218	246	273	102	109	261	76	40	13	161	155	180	130	227	57	278	272	194	375	225	200	252	233	238	156	202	226	256	294	292	294	252	193
ADPRH	25	40	73	109	101	244	162	112	240	136	22	7	87	38	184	126	197	40	189	206	182	151	179	83	357	104	138	147	203	164	225	203	165	167	121	188
ADPRHL1	2	1	8	6	5	8	11	3	3	7	4	0	19	3	28	3	13	1	3	4	25	8	7	10	13	2	17	33	5	16	7	9	19	2	5	12
ADPRHL2	13	16	23	66	28	46	19	29	50	23	8	2	33	42	45	19	61	10	31	37	47	59	46	20	131	15	32	45	47	102	68	43	52	47	39	48
ADRA1A	6	9	8	21	32	10	12	8	12	7	8	6	10	3	8	4	17	18	10	9	5	10	10	12	15	7	24	11	6	19	6	7	15	10	7	7
ADRA1B	3	14	8	6	16	9	9	10	8	10	4	2	5	2	7	4	16	3	11	12	8	10	10	2	6	3	10	4	4	14	4	10	6	14	4	7
ADRA1D	6	1	8	3	4	16	4	6	7	11	10	4	3	6	9	6	23	7	3	9	2	9	11	5	31	7	16	5	11	12	5	6	31	15	7	12
ADRA2A	13	8	23	5	32	42	19	10	9	12	7	3	67	7	46	25	13	11	14	26	48	29	25	29	19	32	18	28	49	18	15	19	13	32	8	13
ADRA2B	7	8	7	10	6	3	7	8	9	8	7	10	16	1	0	9	6	5	9	13	5	10	9	9	11	11	6	9	12	8	9	12	2	10	6	22
ADRA2C	2	4	3	49	22	7	3	18	5	6	5	6	8	20	12	7	38	4	2	7	25	12	15	9	8	4	17	14	8	15	10	13	21	7	9	11
ADRB1	16	29	26	21	16	22	29	28	18	24	19	22	23	24	27	37	31	22	17	25	14	38	19	26	25	25	20	20	45	25	26	38	25	18	21	25
ADRB2	19	7	79	22	43	66	112	39	100	91	5	12	54	26	98	125	45	12	105	107	65	116	73	56	55	49	13	74	137	24	161	107	43	182	96	55
ADRB3	4	4	9	8	7	5	8	7	5	10	8	3	7	4	4	4	12	5	8	13	8	16	5	6	13	6	7	10	4	4	12	6	3	14	7	10
ADRBK1	15	15	80	17	13	24	24	19	34	28	8	8	22	10	25	14	33	10	34	34	30	152	25	31	31	43	14	25	36	33	38	60	29	43	48	33
ADRBK2	53	142	347	595	648	456	209	166	576	236	83	31	154	157	259	397	429	141	535	533	571	874	548	371	832	415	294	363	547	690	525	481	766	519	371	494
ADRM1	9	20	14	59	38	60	26	35	62	38	7	6	19	73	44	35	58	17	36	78	106	98	57	34	94	35	42	47	44	65	66	54	70	41	46	49
ADSL	23	53	119	149	151	133	67	117	146	85	22	14	97	136	178	78	110	49	138	106	226	183	112	90	206	119	200	207	110	166	185	167	171	139	123	196
ADSS	23	87	337	305	231	213	119	153	230	115	43	13	216	361	395	267	248	100	272	313	229	1003	360	314	425	338	317	263	273	321	464	561	457	334	560	419
ADSSL1	7	6	9	61	4	6	15	10	10	2	3	0	21	14	18	22	13	6	8	16	6	6	8	11	40	14	18	25	23	12	20	17	5	11	18	20
AEBP1	431	859	496	4291	1807	17187	1360	1663	3000	1088	432	218	1036	211	2156	341	892	763	3116	1723	2772	2438	4043	1393	4247	886	1394	860	1150	882	2341	2547	5163	1188	1105	2287
AEBP2	41	143	94	141	205	226	186	120	190	182	69	29	169	339	280	327	222	126	252	255	180	339	264	214	609	308	519	255	264	249	341	394	211	356	227	365
AEN	18	18	28	82	42	116	40	26	76	37	10	11	33	34	39	32	55	8	62	54	51	46	53	17	57	26	36	18	43	53	112	19	52	42	26	57
AES	42	64	102	179	154	276	135	81	246	131	27	27	80	150	153	117	194	60	136	183	115	400	153	62	190	145	160	155	176	128	187	262	318	201	191	254
AFAP1	79	115	84	494	325	557	259	258	511	226	68	41	230	119	323	343	475	121	397	438	381	257	519	425	591	308	353	199	342	268	439	779	385	399	261	403
AFAP1-AS1	20	47	26	59	104	51	29	37	25	23	21	12	37	14	43	54	18	27	49	57	21	32	58	113	50	67	28	35	51	47	51	81	32	105	12	42
AFAP1L1	35	177	83	256	250	193	453	151	319	352	26	24	117	40	189	278	180	103	255	385	194	120	235	195	201	225	227	126	456	176	139	246	174	284	178	478
AFAP1L2	28	60	50	42	66	71	110	46	57	62	39	8	55	10	96	134	66	51	71	88	68	90	92	98	49	140	41	42	122	28	91	217	33	183	78	109
AFF1	208	627	2325	973	1517	1817	1373	802	1565	828	311	146	1187	725	1795	2716	2871	608	1848	1860	1537	4443	1868	1754	2728	2939	831	1334	2534	1446	1847	3596	2822	2570	2453	1620
AFF2	117	156	909	550	287	240	241	359	327	266	168	108	166	78	221	160	632	143	273	215	240	2101	475	278	300	288	294	286	339	264	428	344	764	361	1054	950
AFF3	22	40	67	47	31	86	101	36	62	57	24	18	45	14	219	291	107	52	81	76	151	968	81	180	59	142	53	80	156	34	219	277	41	241	60	45
AFF4	320	963	787	1684	1977	2266	1041	873	1959	996	754	109	1306	2319	1881	2207	3415	872	1954	2130	3031	2104	2764	1599	2776	2231	1858	1470	1979	1994	3263	3248	4800	2637	1940	2448
AFG3L1P	9	43	77	68	61	22	27	16	24	19	55	4	45	52	26	42	20	15	54	51	29	63	46	39	57	54	19	34	29	44	33	38	42	68	32	21
AFG3L2	27	43	112	307	215	193	146	157	231	100	39	16	150	218	322	191	290	61	175	195	613	347	242	133	185	144	275	166	202	213	278	284	520	235	205	233
AFM	1	1	4	2	2	1	3	1	6	5	4	5	5	3	5	4	4	1	3	3	1	5	1	2	1	4	1	5	1	3	3	4	2	0	4	5
AFMID	6	15	12	108	17	40	31	36	44	25	4	2	32	29	29	20	39	10	18	49	23	47	35	15	57	33	51	34	22	30	39	42	23	36	47	51
AFP	15	3	3	1	6	3	4	14	3	2	7	15	2	23	7	3	5	4	2	9	18	14	4	2	10	3	11	9	3	10	15	4	2	5	9	7
AFTPH	73	101	596	266	359	522	295	179	501	302	76	32	260	363	479	584	649	155	375	446	431	1166	410	324	701	572	331	354	568	481	583	626	591	657	705	560
AGA	9	31	54	65	45	58	56	68	68	35	5	7	40	51	83	46	20	28	79	106	102	118	67	41	87	55	117	69	78	90	78	99	137	46	114	75
AGAP1	50	119	53	341	159	150	87	92	148	113	58	24	113	102	97	117	158	91	153	158	114	95	234	136	155	121	159	133	140	87	173	238	176	139	158	191
AGAP11	2	26	19	5	12	6	47	16	10	10	6	2	27	10	27	152	9	34	51	45	12	15	22	66	12	123	5	23	59	15	9	44	9	150	13	7
AGAP2	17	14	53	39	24	70	29	27	45	24	14	10	17	28	40	26	40	22	23	32	28	81	35	26	20	28	45	41	30	39	61	36	35	45	47	39
AGAP3	27	70	32	143	163	106	70	62	85	61	33	10	85	71	136	95	84	72	131	108	53	56	85	107	158	119	75	47	89	162	129	142	211	121	54	112
AGAP4	0	0	2	0	5	0	0	0	0	0	0	0	0	0	1	0	0	0	2	0	0	0	0	0	0	2	0	0	0	0	0	0	4	2	2	0
AGAP5	2	4	8	7	13	6	4	4	3	3	8	4	4	5	2	7	3	10	7	9	2	10	7	4	5	20	11	10	2	9	12	14	5	14	7	7
AGAP6	0	14	17	14	10	8	5	8	4	5	3	0	18	7	13	8	7	5	14	6	7	13	8	8	4	24	7	11	7	10	5	4	17	23	13	5
AGAP7	0	0	0	2	0	1	0	1	1	0	0	0	1	0	0	0	0	1	2	0	0	1	1	0	1	1	0	2	0	0	0	4	1	0	0	0
AGAP8	0	1	0	0	0	0	0	1	0	0	0	0	2	0	0	0	0	0	2	1	0	0	2	0	0	0	0	2	0	0	2	0	0	0	0	0
AGAP9	0	0	0	0	0	0	0	0	0	0	0	0	2	0	0	0	0	0	0	0	0	0	0	0	0	0	0	0	0	0	0	0	2	0	0	0
AGBL1	3	2	1	5	6	5	3	6	2	4	2	3	19	2	14	7	4	3	0	4	4	4	1	2	8	5	2	3	4	1	4	5	9	3	5	5
AGBL2	5	10	7	4	9	10	6	4	7	5	3	1	13	5	8	8	6	4	7	7	6	22	8	14	12	8	20	8	12	13	11	13	2	15	5	14
AGBL3	8	5	13	14	15	14	24	3	8	12	5	6	12	8	19	47	44	19	13	19	10	17	25	30	25	40	20	22	36	31	16	37	25	33	13	23
AGBL4	6	4	5	7	6	2	1	7	5	5	6	7	4	2	6	2	6	3	3	3	3	13	1	3	18	4	2	6	2	6	8	7	4	1	1	5
AGBL5	69	69	166	459	321	358	157	206	324	156	48	43	151	249	245	183	263	93	209	253	363	469	306	137	705	200	413	372	385	380	701	413	475	260	452	782
AGER	3	19	45	18	21	9	8	6	10	7	1	2	20	10	6	21	6	10	20	7	14	36	12	22	8	23	10	4	9	17	13	15	6	28	9	13
AGFG1	82	214	589	638	425	538	345	220	506	293	75	55	354	1008	516	676	384	229	708	831	538	992	644	448	532	734	491	456	577	463	637	769	542	755	697	702
AGFG2	18	26	72	48	36	63	45	30	28	38	15	8	26	33	42	56	37	19	56	48	38	112	34	35	52	67	15	20	54	35	26	77	44	79	42	41
AGGF1	45	88	273	247	325	436	260	236	393	200	88	16	206	403	350	315	263	111	367	363	401	574	469	290	438	326	292	331	350	400	506	483	522	393	394	415
AGK	49	56	95	155	120	107	76	74	116	72	47	11	98	95	110	110	217	42	130	165	148	154	154	107	226	170	231	142	178	147	241	211	213	164	137	163
AGL	58	85	307	289	156	280	199	139	257	154	59	33	549	578	442	337	412	155	341	257	390	722	376	280	617	404	344	564	381	343	325	591	563	390	424	391
AGMAT	2	4	7	23	17	5	4	6	4	15	2	2	8	4	11	9	32	2	9	9	13	11	5	6	6	9	26	22	6	9	12	9	10	6	10	1
AGPAT1	27	91	146	274	208	293	116	121	196	105	31	17	148	212	171	144	264	100	172	211	417	316	420	123	420	168	286	162	156	194	290	275	296	197	179	244
AGPAT2	2	2	18	19	3	16	17	20	12	14	3	3	11	10	13	23	26	7	10	15	31	50	8	7	8	2	24	14	31	12	24	26	17	15	12	14
AGPAT3	44	65	186	212	136	202	94	101	195	67	25	21	110	226	152	94	185	57	198	192	243	249	187	113	151	132	128	113	177	132	186	187	473	192	127	159
AGPAT4	37	125	308	251	211	224	112	111	126	89	33	22	196	183	117	177	134	105	173	172	174	253	211	191	145	310	113	113	187	124	254	267	163	232	158	149
AGPAT5	16	38	181	303	198	220	125	101	188	136	47	14	112	176	195	151	328	54	154	231	175	399	176	131	651	167	553	241	228	171	204	256	330	225	175	241
AGPAT6	31	99	174	337	250	292	108	124	216	112	36	17	197	426	172	122	261	89	205	201	232	218	315	112	718	164	312	172	160	402	276	284	259	217	210	195
AGPAT9	11	13	124	13	10	24	17	29	42	26	4	12	65	209	86	87	34	15	65	23	27	216	54	28	51	29	8	32	88	31	48	39	13	62	70	39
AGPHD1	15	9	16	7	14	32	33	29	26	36	17	10	17	25	51	33	65	14	17	19	37	35	35	31	41	43	45	36	41	20	44	63	37	42	37	42
AGPS	68	163	563	426	367	573	435	328	664	371	66	58	403	812	712	537	661	166	620	797	969	1428	825	474	1308	636	745	777	814	1048	961	1180	1083	775	996	1068
AGR2	2	1	1	2	0	1	1	2	1	3	2	0	1	0	1	0	4	1	1	2	4	4	0	0	7	2	0	1	1	4	3	2	0	1	0	3
AGR3	0	0	1	0	1	1	0	0	1	1	2	0	1	1	1	0	0	2	1	0	0	0	1	0	1	0	2	0	0	0	0	2	1	2	0	0
AGRN	17	18	27	99	63	64	49	39	83	55	21	10	50	190	48	37	104	40	77	63	47	38	74	36	97	44	120	46	50	55	58	81	47	33	55	96
AGRP	3	3	1	4	2	2	0	1	0	2	1	1	1	0	1	1	0	0	1	1	1	2	1	1	1	1	3	2	1	0	6	1	0	2	0	2
AGT	10	12	8	37	22	12	32	21	48	30	2	2	43	5	94	41	65	16	42	22	10	13	56	15	21	28	19	9	32	29	21	33	14	35	10	9
AGTPBP1	72	103	659	134	196	257	197	173	307	163	27	20	230	111	408	399	368	147	352	378	216	1492	345	284	604	541	276	383	433	373	397	336	225	511	877	443
AGTR1	6	14	194	38	131	268	133	55	37	109	14	9	17	8	42	76	234	19	46	38	62	77	164	35	117	108	22	70	122	108	60	69	87	154	76	59
AGTR2	6	4	4	6	7	8	10	8	6	11	7	8	3	3	9	6	9	7	6	7	8	7	3	6	9	7	11	6	4	9	9	13	7	4	8	7
AGTRAP	3	7	46	30	16	34	2	9	25	15	4	1	17	69	35	7	22	3	21	29	15	105	25	13	13	23	17	9	14	12	30	21	29	22	28	13
AGXT	1	4	1	4	0	2	6	0	0	1	2	0	2	3	11	3	2	3	5	1	2	5	3	1	3	1	1	3	2	1	5	3	1	2	2	2
AGXT2	6	2	3	7	1	4	2	3	4	4	7	4	0	4	4	1	4	2	1	1	1	7	3	1	4	2	3	3	2	6	8	1	2	4	2	3
AGXT2L1	6	1	4	3	4	8	4	5	2	4	6	8	5	5	10	8	7	3	1	6	5	5	4	3	7	4	4	2	4	7	7	4	3	3	4	4
AGXT2L2	11	27	85	56	106	73	44	18	71	36	15	7	54	44	50	62	33	16	105	81	35	75	57	29	38	76	44	45	58	42	86	67	56	97	79	72
AHCTF1	92	209	233	314	329	418	221	154	324	185	168	40	285	515	394	572	469	195	360	451	337	596	530	367	534	502	549	302	438	374	397	572	911	653	400	361
AHCY	23	23	74	258	143	114	57	80	171	40	16	8	59	264	99	33	155	27	108	97	98	196	138	57	151	49	230	155	86	133	179	149	358	70	91	138
AHCYL1	120	216	536	1244	1290	1530	741	938	1508	720	151	77	779	1461	1370	1186	2218	250	1103	1149	1809	1521	1589	836	3209	882	1181	987	1445	1324	2039	2247	3924	1430	1009	1702
AHCYL2	33	86	90	183	244	128	133	87	240	108	53	26	129	114	252	301	438	59	170	214	207	221	220	225	331	302	190	272	250	248	306	495	610	323	237	262
AHDC1	24	35	34	77	77	99	47	45	50	40	27	25	38	71	68	40	138	33	63	49	59	92	81	38	78	45	48	75	46	72	88	60	76	67	30	69
AHI1	147	502	148	558	362	497	225	204	305	180	243	41	319	231	406	551	631	418	595	512	478	298	523	398	743	642	436	283	328	510	692	456	429	683	321	358
AHNAK	1352	4649	3315	8026	7365	13352	15663	5493	10462	7066	1502	739	7202	5674	15451	29585	7560	3003	10470	10197	7061	8999	10535	10208	13474	14032	8871	9341	20901	5872	9864	30784	14066	24902	10848	14005
AHNAK2	87	138	46	418	198	820	100	133	108	53	120	36	319	88	311	245	739	82	181	232	1332	190	503	232	142	159	504	217	89	149	199	247	701	212	61	146
AHR	233	323	338	1346	1354	2643	1113	1140	2349	797	139	115	1009	1202	2058	1258	1895	581	2481	2791	2683	1094	3914	853	2824	1336	4270	4531	1273	1783	2247	1584	2586	1430	1504	1652
AHRR	14	10	18	109	17	17	16	10	9	18	7	10	9	12	8	9	44	5	12	32	13	15	16	12	20	7	20	12	13	16	13	8	11	14	6	23
AHSA1	41	49	202	610	322	388	176	162	369	162	46	23	200	489	287	212	409	54	202	283	481	477	312	147	531	211	536	329	289	445	338	415	703	246	254	260
AHSA2	72	292	348	262	334	171	157	86	95	111	97	12	336	315	189	259	97	163	433	276	96	283	150	354	155	713	264	150	191	179	121	314	208	811	111	90
AHSG	2	1	3	1	4	0	1	1	1	2	3	1	2	0	1	0	2	1	0	1	1	8	0	0	2	0	2	2	0	3	2	1	1	3	0	3
AHSP	11	8	1254	11	17	33	18	14	24	15	8	11	22	12	21	15	10	23	19	29	13	1925	17	29	11	219	0	75	77	1	1	21	1	61	323	7
AICDA	5	0	10	3	7	8	6	8	5	4	3	5	3	1	4	6	8	6	2	10	4	6	8	6	9	3	8	6	6	9	10	6	7	7	4	5
AIDA	38	45	125	145	115	246	155	150	210	120	19	16	126	174	162	174	137	70	136	192	243	271	184	99	251	174	137	122	238	219	194	287	237	175	164	289
AIF1	170	107	687	504	633	1012	666	593	2225	939	83	63	235	207	972	514	497	146	1228	1599	1658	1734	1581	307	1494	413	315	591	1142	1664	2402	974	875	697	923	1309
AIF1L	17	47	50	23	74	66	319	74	73	196	20	14	84	16	215	162	41	21	87	131	63	146	53	100	25	183	39	123	325	45	70	248	37	287	177	61
AIFM1	37	39	94	203	199	173	84	107	223	69	37	15	102	126	184	94	191	32	163	146	240	243	220	121	141	118	189	136	166	135	191	239	398	142	146	123
AIFM2	5	11	17	57	17	58	32	21	62	16	9	7	29	134	35	61	20	15	30	57	75	51	34	30	68	35	45	38	67	58	23	58	46	49	30	29
AIFM3	3	8	4	3	9	5	3	10	2	5	2	2	3	3	4	6	5	6	1	1	3	10	2	8	6	10	6	1	4	5	4	3	8	7	6	4
AIG1	24	30	155	220	170	283	138	163	256	122	27	14	123	268	234	187	285	54	178	234	531	330	256	163	240	210	143	200	325	236	244	502	324	257	249	341
AIM1	84	147	914	194	334	607	429	268	576	316	71	27	247	331	469	779	257	164	633	652	1205	1409	718	262	443	391	148	246	613	317	420	420	498	457	664	437
AIM1L	17	14	18	11	16	15	21	25	13	22	20	10	18	11	18	16	25	14	10	13	9	17	11	18	18	15	18	9	17	13	19	17	16	10	20	11
AIM2	14	6	16	18	24	57	8	14	64	15	10	14	44	246	30	27	39	16	53	52	275	59	52	13	41	18	12	23	40	74	28	20	82	23	42	18
AIMP1	27	82	172	269	299	284	200	237	369	207	48	27	215	240	415	311	172	86	331	292	488	519	348	218	669	286	429	351	385	383	540	477	694	524	340	497
AIMP2	19	40	125	257	160	130	51	45	117	70	27	10	79	106	111	74	144	31	109	123	118	231	134	69	178	46	101	87	68	148	152	126	266	81	100	110
AIP	10	8	23	69	26	64	29	32	66	27	6	3	16	22	52	24	29	10	32	36	34	55	37	22	74	34	85	52	62	48	55	65	69	45	49	61
AIPL1	6	2	7	8	6	7	2	4	4	7	2	1	5	5	5	2	3	6	7	5	5	12	6	1	9	5	7	3	4	6	4	3	4	5	4	6
AIRE	6	7	6	7	7	4	6	5	7	10	7	8	2	5	3	5	5	7	2	7	4	5	3	5	5	3	7	6	4	7	2	3	3	10	0	6
AJAP1	10	19	13	10	15	15	13	12	64	23	8	11	5	9	19	8	10	19	13	13	13	16	15	14	11	11	6	8	13	18	21	16	13	19	12	19
AK1	11	28	68	110	71	90	58	76	68	25	19	11	94	33	133	39	106	24	49	72	94	105	95	47	60	60	46	126	63	74	177	83	134	54	64	125
AK2	65	203	461	570	316	300	300	303	483	263	195	40	420	502	575	451	622	189	464	423	585	1014	474	536	1537	639	650	526	634	578	647	885	735	547	575	621
AK3	38	62	137	242	174	205	219	172	215	134	27	20	235	228	320	237	216	92	236	294	341	392	241	166	583	299	251	270	326	268	310	489	206	303	310	463
AK4	31	23	53	218	40	60	80	114	157	55	43	13	151	763	237	386	637	54	98	204	661	161	105	87	2330	116	365	95	225	68	860	153	67	116	224	587
AK5	44	191	48	162	635	185	97	298	310	64	104	26	183	45	457	81	435	215	218	146	38	147	363	506	607	357	188	269	392	362	230	1071	785	261	309	639
AK7	6	5	19	2	3	2	9	4	9	5	5	1	13	4	15	8	4	8	2	5	3	25	7	3	8	7	8	4	7	9	12	4	7	15	14	11
AKAP1	18	22	112	103	69	101	88	51	64	73	22	10	110	104	124	213	98	28	68	84	100	107	61	67	157	92	145	78	135	59	87	104	103	128	102	41
AKAP10	61	112	143	202	410	204	130	81	197	104	84	23	102	140	169	179	332	102	219	225	198	378	256	138	365	282	294	282	187	280	324	260	289	314	233	303
AKAP11	167	514	675	909	1137	1775	1250	563	1482	846	271	110	862	576	1522	2161	1738	480	1705	1614	1041	1824	1873	1344	1418	1806	1419	1155	2074	1005	1501	2718	2650	2258	1418	1785
AKAP12	165	618	502	1522	696	1152	1796	512	1669	1544	130	128	676	650	1622	3273	1422	556	840	962	886	1972	1547	1024	1093	1417	452	1130	3397	1090	630	2954	453	1914	1649	1031
AKAP13	457	1233	1588	1656	1952	2791	1630	1198	2240	1364	419	150	1448	1389	2111	1854	4651	1122	2592	2281	3099	3292	2603	1636	3099	2174	1837	1561	2635	1932	2563	2856	2863	3088	2091	2543
AKAP14	2	1	0	0	0	0	1	2	0	1	2	0	1	1	1	1	3	2	3	0	2	0	0	3	2	3	1	5	0	1	1	1	1	1	1	3
AKAP17A	0	2	0	0	0	3	0	0	0	1	0	0	0	0	0	0	0	0	0	0	0	0	0	0	0	0	0	2	0	0	0	0	0	4	0	0
AKAP2	271	701	668	1735	1661	2145	3090	1325	3017	2125	225	135	984	346	2551	3231	2422	782	2073	2954	1767	2131	2550	1792	3009	1996	1627	1426	4531	1721	1962	4034	2279	2989	2755	4196
AKAP3	6	6	2	7	6	7	6	8	5	10	7	5	5	2	9	12	16	2	6	14	13	10	7	2	109	13	31	20	3	11	44	12	11	11	11	12
AKAP4	3	4	5	4	4	1	6	6	4	3	5	0	2	6	4	2	4	5	5	3	1	3	3	0	4	2	4	4	3	3	4	3	3	5	3	2
AKAP5	30	26	25	57	39	108	50	41	60	41	37	12	46	35	46	51	41	42	49	61	75	61	74	53	156	74	55	44	80	237	71	72	52	68	44	72
AKAP6	55	482	94	333	1862	155	156	424	226	114	422	59	1800	131	1528	217	432	403	484	339	92	255	679	2364	979	1126	182	384	581	368	669	2053	1019	662	223	620
AKAP7	9	13	89	38	81	40	29	21	52	20	15	8	24	20	46	67	69	15	42	38	64	164	67	50	63	47	57	57	47	74	56	65	36	56	66	73
AKAP8	28	79	136	315	150	159	102	69	135	111	27	13	115	171	206	166	134	69	163	148	188	281	158	101	155	152	153	136	161	159	202	209	180	178	199	197
AKAP8L	31	46	153	157	78	75	62	40	87	46	44	8	53	95	53	77	147	23	54	75	56	292	79	40	166	95	173	106	63	143	115	99	204	99	119	74
AKAP9	730	1655	2174	1597	2312	2518	1581	1078	1773	1032	1778	161	1907	1372	2464	3412	2421	1930	2594	2427	2557	4060	2707	2749	4873	4403	3242	2543	3324	3328	3021	4629	3242	4320	2615	1952
AKD1	25	107	133	86	107	69	104	50	113	89	23	18	93	33	139	300	62	101	118	102	92	263	94	218	121	248	109	117	183	108	154	286	62	265	161	220
AKIRIN1	39	59	206	413	200	215	194	171	418	153	26	21	149	308	276	159	304	80	201	242	192	472	239	150	849	332	507	405	359	877	531	568	426	244	577	539
AKIRIN2	18	39	137	113	132	159	101	101	232	91	35	20	122	283	213	163	109	62	157	188	168	342	207	119	214	130	134	156	190	196	242	233	171	152	185	246
AKNA	53	73	165	72	80	122	85	58	117	117	35	50	55	31	89	160	88	50	109	125	103	289	129	70	81	119	63	118	141	83	194	113	104	196	167	125
AKNAD1	8	7	5	10	16	5	5	18	7	10	6	6	7	2	13	5	17	7	8	7	18	7	7	5	13	14	6	8	4	8	38	13	13	9	10	14
AKR1A1	22	50	73	206	138	349	98	120	273	113	18	8	96	192	171	78	173	34	228	250	237	166	232	82	279	83	167	135	152	293	326	187	283	126	151	193
AKR1B1	41	32	44	145	112	274	91	46	320	126	26	17	122	301	166	86	314	39	164	274	166	166	217	69	313	77	183	222	111	253	276	228	401	147	140	162
AKR1B10	2	2	2	0	2	2	1	4	3	1	0	1	234	1900	26	20	40	8	9	37	31	35	37	21	1	1	2	2	2	4	8	1	7	3	0	0
AKR1B15	3	0	0	0	3	0	3	2	2	2	0	1	16	18	6	3	4	2	0	3	1	0	3	2	1	3	4	5	1	4	1	2	20	1	1	0
AKR1C1	2	11	10	5	10	14	26	11	17	6	1	2	293	2976	93	151	46	21	45	65	85	75	51	53	10	21	5	7	83	4	10	45	7	18	58	8
AKR1C2	2	5	21	11	6	3	38	17	10	19	0	2	369	2584	97	117	43	23	32	39	60	83	43	58	9	52	4	12	126	9	9	44	2	34	38	28
AKR1C3	11	18	30	16	40	24	103	47	109	92	5	10	515	4885	244	213	101	82	97	184	176	211	148	132	15	87	13	61	172	37	86	178	17	121	133	69
AKR1C4	3	1	0	1	3	1	1	1	0	3	1	1	9	11	0	1	0	0	1	4	2	1	1	0	4	0	2	1	2	0	0	0	0	0	1	1
AKR1CL1	4	3	2	7	3	1	6	7	4	2	1	2	4	7	3	10	6	2	5	5	2	11	4	0	5	0	6	1	5	6	2	3	1	1	3	3
AKR1D1	949	183	108	132	52	106	116	689	115	280	284	1058	125	7	92	11	234	129	51	174	75	105	24	32	145	44	216	147	35	114	142	22	4	42	80	245
AKR1E2	11	37	21	56	69	25	20	37	46	33	7	3	25	4	46	43	82	21	45	32	17	55	43	39	52	54	39	31	56	29	98	50	70	47	20	99
AKR7A2	7	7	26	55	32	47	31	22	52	16	7	7	18	24	31	28	35	6	26	32	38	59	30	17	110	13	46	40	25	27	47	81	59	29	23	46
AKR7A2P1	0	3	5	3	1	4	1	1	1	5	3	4	0	2	2	2	3	2	2	2	4	1	3	1	7	1	4	2	3	4	2	6	1	2	2	5
AKR7A3	2	3	1	1	1	0	2	0	0	0	3	0	0	0	0	0	1	1	0	0	0	1	2	2	3	2	2	1	0	3	0	1	0	4	0	3
AKR7L	4	8	6	16	5	11	6	5	4	3	3	2	9	2	1	7	6	3	4	3	5	5	7	2	21	6	8	8	5	7	1	3	8	5	7	1
AKT1	31	60	67	318	182	161	69	68	170	87	51	20	104	183	112	121	137	41	117	152	165	180	171	72	452	103	254	166	141	184	240	179	299	141	119	213
AKT1S1	7	12	23	26	26	28	16	24	20	22	8	6	25	52	52	15	32	15	18	25	7	37	41	6	40	22	42	30	36	28	45	50	68	11	28	23
AKT2	41	76	158	148	132	198	109	117	160	90	40	18	129	180	222	202	273	82	155	179	228	327	158	100	231	214	169	173	231	151	342	294	205	203	186	239
AKT3	90	241	180	160	427	665	674	366	534	529	91	34	368	126	729	893	473	181	472	629	345	797	582	532	410	702	353	373	849	463	717	1137	652	984	446	1131
AKTIP	7	24	107	91	93	119	108	60	132	92	8	11	58	72	133	111	56	44	128	113	72	202	71	78	75	161	61	130	158	90	99	221	93	174	163	168
ALAD	33	61	1012	160	150	296	141	155	308	168	33	27	149	172	177	197	252	65	181	233	513	1573	276	149	181	451	149	194	339	213	197	392	342	305	367	285
ALAS1	20	49	317	120	170	188	73	58	108	72	28	6	86	109	156	111	128	54	81	107	94	682	59	98	200	141	108	110	146	265	117	223	271	164	209	184
ALAS2	37	36	2359	35	73	102	72	98	74	140	23	21	63	41	80	85	40	52	47	62	39	4004	46	68	13	540	21	237	349	22	4	46	6	277	545	64
ALB	0	3	4	2	4	5	2	6	0	1	4	4	5	2	2	1	4	3	6	1	2	5	4	2	4	5	5	5	3	2	2	4	4	1	2	7
ALCAM	61	54	208	418	295	428	156	377	544	134	64	33	208	422	500	480	452	105	524	566	1138	681	587	184	2893	330	374	361	236	821	543	343	1013	516	315	295
ALDH16A1	6	6	18	6	16	26	12	14	28	16	2	1	15	22	24	13	28	3	26	30	28	26	25	18	29	10	17	10	32	14	27	27	38	26	16	13
ALDH18A1	33	64	103	423	185	564	102	173	328	121	48	28	135	298	166	88	275	69	219	252	332	278	351	115	278	158	431	192	163	276	511	288	417	130	285	258
ALDH1A1	87	60	254	106	380	774	263	223	2082	544	46	40	421	2979	545	579	277	116	815	1243	368	661	873	217	69	282	79	498	412	745	941	581	421	494	279	332
ALDH1A2	4	6	10	17	49	8	24	19	18	9	9	4	37	8	88	36	8	8	7	20	10	13	25	28	31	28	7	11	20	18	11	31	34	41	18	12
ALDH1A3	18	81	80	58	58	69	104	28	139	80	23	20	65	32	236	122	136	66	54	103	99	200	66	305	82	291	57	155	357	17	61	1521	55	267	315	104
ALDH1B1	23	37	34	130	89	1137	65	151	182	88	12	28	148	173	192	71	340	62	164	355	1475	157	493	102	134	49	310	147	145	135	230	165	139	65	131	134
ALDH1L1	3	3	5	6	5	2	15	5	3	4	3	4	4	10	23	34	2	3	2	10	9	14	6	6	7	2	6	9	24	2	2	9	2	3	10	4
ALDH1L2	104	326	221	912	595	2281	399	575	1318	274	90	66	361	103	421	298	1371	340	763	942	1003	561	2186	546	750	1095	1295	784	750	803	1316	1479	1106	699	1945	1737
ALDH2	25	61	252	181	447	348	348	255	509	181	40	35	247	941	832	960	405	90	311	388	792	732	491	324	1087	334	385	561	655	154	363	595	356	397	581	475
ALDH3A1	5	6	3	7	3	3	8	2	4	4	1	1	133	1075	19	25	22	14	16	29	20	30	14	29	7	3	6	6	1	4	4	6	1	3	6	5
ALDH3A2	54	85	266	381	552	390	400	259	472	245	25	23	583	4808	817	874	659	168	465	755	657	723	783	398	761	369	579	507	719	456	498	912	552	477	392	403
ALDH3B1	9	26	117	121	80	80	33	46	106	49	8	5	23	11	74	70	55	28	77	79	67	261	92	58	67	76	62	79	74	90	125	167	113	90	163	98
ALDH3B2	2	2	0	1	3	4	2	7	1	6	3	1	4	2	4	1	0	2	2	4	2	2	1	6	1	0	4	2	0	4	2	2	3	6	6	2
ALDH4A1	14	14	19	21	12	21	19	9	11	15	9	3	14	33	27	29	30	12	18	24	13	69	44	13	47	14	23	31	31	17	16	31	34	20	21	20
ALDH5A1	15	23	169	99	38	41	42	24	58	33	20	13	62	79	106	116	77	25	65	47	39	299	47	79	39	83	112	71	103	33	41	137	37	85	71	72
ALDH6A1	22	55	89	159	111	112	103	55	166	57	18	24	47	58	81	185	290	47	90	114	129	184	158	131	390	220	132	132	210	115	137	299	165	181	238	246
ALDH7A1	24	58	37	282	200	228	177	149	186	82	16	19	90	201	118	126	253	24	134	151	279	142	243	135	313	98	149	194	209	150	237	334	312	169	170	268
ALDH8A1	2	11	13	10	15	5	4	5	4	4	6	2	9	3	3	2	8	4	14	7	6	10	4	5	8	9	12	8	11	6	3	3	9	11	3	4
ALDH9A1	56	87	251	377	273	443	396	334	760	323	60	29	333	417	710	635	719	121	655	758	499	701	627	372	657	419	431	482	882	426	624	1098	863	530	630	855
ALDOA	46	45	268	1060	398	447	200	274	560	204	66	36	340	690	607	233	430	91	338	477	572	824	469	225	1228	206	654	429	302	307	537	532	750	287	372	610
ALDOB	2	15	7	5	4	7	13	9	3	15	8	4	3	2	7	5	13	12	2	7	1	7	7	4	6	10	6	15	7	9	15	11	7	9	5	4
ALDOC	3	11	22	39	9	24	17	23	41	22	4	2	8	30	42	50	10	14	20	23	45	53	20	18	41	31	62	10	47	8	86	84	16	59	35	126
ALG1	9	24	17	31	76	44	17	12	67	31	7	2	23	50	41	31	47	10	26	32	42	33	46	29	49	30	72	37	26	44	42	48	71	36	50	31
ALG10	1	7	29	25	40	49	32	24	30	12	6	7	23	30	22	34	29	14	34	22	35	57	40	25	37	44	98	25	44	23	48	47	32	39	32	36
ALG10B	25	25	70	117	91	93	65	55	66	47	38	16	72	107	103	134	80	39	98	71	68	154	108	114	165	143	176	105	131	78	300	138	120	142	102	153
ALG11	23	52	167	174	183	223	124	129	286	123	27	15	108	121	198	245	214	42	225	195	163	333	232	132	203	217	387	171	251	231	325	407	463	250	304	292
ALG12	3	7	18	36	31	37	9	14	20	10	6	0	12	33	19	19	31	4	21	26	27	40	23	19	60	20	22	16	21	7	30	32	18	26	23	26
ALG13	94	313	303	267	399	343	279	207	266	238	113	51	321	269	355	481	305	275	474	500	486	409	390	421	407	645	478	329	302	340	458	499	493	642	347	386
ALG14	6	12	20	51	45	30	29	22	60	24	7	6	34	53	43	32	87	10	24	52	75	37	37	31	81	33	58	61	40	41	65	43	99	27	70	88
ALG1L	2	0	4	1	3	0	0	2	1	1	0	1	4	4	1	1	0	3	4	1	1	4	1	1	2	1	2	5	1	3	1	4	3	1	0	2
ALG1L2	0	0	1	2	2	0	1	0	1	0	0	0	0	1	0	1	0	0	2	2	0	1	1	2	2	0	3	0	0	2	0	5	0	2	0	1
ALG2	19	46	91	253	145	239	107	126	213	93	19	12	119	212	171	167	395	67	184	248	324	259	261	162	243	109	199	145	129	204	243	261	560	140	223	253
ALG3	19	19	65	135	74	126	44	41	92	44	27	9	96	560	68	48	334	50	91	109	169	129	132	64	125	42	265	119	38	109	98	87	296	54	62	119
ALG5	20	23	67	81	122	184	82	134	185	70	15	8	88	91	131	111	68	27	104	119	116	107	136	62	188	56	146	126	137	153	196	172	246	84	132	178
ALG6	18	38	97	97	118	48	63	52	71	60	26	16	83	133	81	96	229	37	105	121	120	242	119	83	290	96	69	47	83	103	74	88	180	104	118	66
ALG8	29	72	168	230	317	306	149	155	316	126	42	14	161	459	314	265	981	84	316	393	491	344	465	215	597	246	504	306	262	250	281	408	729	273	329	283
ALG9	23	53	91	141	161	151	80	73	173	78	47	18	100	162	108	228	173	75	140	139	136	160	160	119	322	176	236	158	164	114	195	213	279	192	185	149
ALK	12	14	10	8	13	16	11	10	13	12	1	10	11	13	13	11	12	10	9	18	9	12	10	8	18	11	15	7	6	15	10	8	11	8	10	11
ALKBH1	9	23	53	119	66	58	35	46	63	39	17	6	56	56	65	59	86	33	87	58	144	124	68	40	180	73	103	77	73	144	66	90	124	62	55	99
ALKBH2	10	21	13	46	21	37	24	23	39	16	4	2	39	24	46	42	34	8	28	25	27	27	41	25	75	26	67	44	37	22	39	45	40	18	26	38
ALKBH3	13	25	25	88	84	47	40	71	67	52	15	0	37	70	95	66	37	17	45	75	134	102	64	32	63	33	90	86	99	74	100	97	131	57	58	89
ALKBH4	5	4	27	26	18	17	10	14	17	17	9	5	13	6	17	8	7	5	2	5	21	35	15	21	21	16	23	11	14	24	28	23	21	20	22	35
ALKBH5	39	64	206	443	237	294	130	165	282	136	43	36	111	231	199	184	268	78	201	262	291	377	303	101	576	151	734	403	195	298	305	295	529	185	192	284
ALKBH6	6	3	16	17	11	10	8	3	12	13	1	2	9	10	5	13	23	7	24	9	5	23	14	10	18	6	14	14	8	22	25	22	20	18	22	22
ALKBH7	4	2	9	22	23	19	9	24	25	19	9	4	2	11	19	7	28	4	11	18	9	24	11	7	24	5	15	13	23	20	22	24	31	6	12	41
ALKBH8	36	53	56	98	115	117	109	95	91	76	32	25	88	77	144	138	97	72	116	174	141	180	167	126	263	112	164	177	187	140	120	256	168	163	109	163
ALLC	0	1	2	0	2	2	1	2	0	1	0	0	4	0	1	1	2	0	2	2	0	1	0	3	2	0	1	0	1	3	3	2	2	1	0	3
ALMS1	230	553	1141	873	1274	854	631	410	507	446	502	108	580	655	882	1452	1162	488	986	752	1286	1629	960	1086	2343	1634	1214	920	1053	917	837	1691	1531	1583	978	1074
ALMS1P	2	4	9	2	2	1	7	8	2	5	3	2	1	2	3	6	7	4	2	7	1	3	5	7	2	4	3	2	7	1	7	9	2	2	8	3
ALOX12	7	8	49	14	10	6	6	4	6	10	5	3	23	19	18	23	5	3	16	11	9	41	10	15	9	21	5	10	11	13	7	16	12	33	21	4
ALOX12B	3	2	4	3	5	3	2	0	3	4	2	3	2	0	1	4	1	1	1	2	4	3	4	3	4	6	2	4	2	3	3	5	1	2	3	1
ALOX12P2	8	5	11	12	18	7	4	11	3	6	43	1	10	10	5	20	13	3	10	6	11	8	13	10	9	30	9	3	13	24	10	21	22	27	5	4
ALOX15	2	3	15	2	1	9	8	11	6	6	4	3	9	4	5	3	4	9	2	6	3	82	7	6	2	9	12	7	6	4	9	7	5	8	4	2
ALOX15B	7	3	17	14	7	24	8	12	5	9	5	3	3	3	4	4	3	5	9	12	4	11	9	9	6	4	9	2	0	5	4	7	3	8	4	5
ALOX5	21	12	225	26	36	115	23	7	53	32	4	5	41	20	62	55	38	16	93	78	55	374	43	38	69	91	11	39	59	57	68	29	37	83	168	20
ALOX5AP	29	16	1128	151	67	223	128	82	155	109	12	27	117	54	196	216	210	35	231	170	481	2685	173	122	723	228	96	193	206	227	357	218	228	323	902	238
ALOXE3	8	5	2	5	12	5	6	7	5	10	3	3	2	2	4	3	5	5	8	5	2	2	3	4	6	2	7	6	6	6	5	6	5	8	4	6
ALPI	1	1	3	4	3	1	5	4	3	8	1	4	3	3	7	0	2	2	2	2	2	3	2	3	5	2	1	2	3	3	1	3	4	3	4	6
ALPK1	25	40	204	72	85	119	65	45	128	60	15	13	103	55	132	124	65	31	106	97	108	300	101	93	126	199	76	83	102	68	125	127	150	208	171	56
ALPK2	61	28	24	55	54	706	26	62	202	57	45	20	111	28	134	42	44	39	235	297	99	55	273	26	68	14	23	33	17	94	90	30	72	32	35	21
ALPK3	41	97	63	95	125	127	226	76	120	136	35	17	109	46	112	342	239	64	154	194	154	86	123	118	112	108	80	102	292	132	115	197	81	137	98	119
ALPL	53	273	68	640	318	125	147	309	939	145	99	26	203	75	191	143	5379	395	406	300	98	336	972	383	4888	496	2627	1448	425	562	386	1016	3206	432	968	501
ALPP	14	0	14	6	7	8	6	3	2	3	9	8	4	0	2	2	2	2	1	4	1	6	2	2	6	2	4	7	4	6	10	3	3	3	3	6
ALPPL2	4	2	1	3	1	1	0	2	2	4	4	1	0	2	2	0	1	2	1	1	3	3	0	2	3	4	2	3	0	3	3	3	1	4	1	0
ALS2	66	257	260	427	374	289	234	143	356	156	59	27	239	214	255	373	285	131	307	273	267	386	361	294	804	425	408	277	259	296	322	499	391	465	296	348
ALS2CL	8	7	14	17	38	20	17	8	14	16	5	4	30	6	22	28	21	16	24	22	25	28	19	51	16	29	9	12	22	8	20	32	13	53	27	15
ALS2CR11	60	76	29	226	54	42	80	73	82	91	80	32	52	20	83	90	107	96	98	81	87	70	107	123	429	136	75	75	98	37	386	143	135	113	103	180
ALS2CR12	5	25	188	10	30	18	20	25	36	42	17	2	32	7	23	35	4	10	32	12	8	114	27	35	15	90	34	47	88	12	19	32	23	44	44	38
ALS2CR4	17	51	57	147	143	168	126	102	154	89	22	13	135	215	230	186	301	74	157	185	235	169	218	121	344	152	294	277	106	90	338	236	357	177	165	258
ALS2CR8	38	76	148	141	203	191	117	84	139	114	21	21	121	123	184	248	172	99	227	195	170	256	199	237	238	292	139	175	267	149	271	368	275	278	158	275
ALX1	7	3	2	1	1	2	1	3	5	3	2	2	3	0	1	0	71	0	14	1	0	9	1	2	16	0	132	91	4	11	29	9	18	2	2	2
ALX3	6	4	3	10	3	7	6	5	6	7	2	2	4	6	6	3	10	3	6	6	5	6	2	5	10	4	7	7	9	3	2	9	4	9	8	8
ALX4	17	13	18	68	42	14	20	19	19	21	21	11	9	10	19	26	90	6	22	9	8	15	9	16	48	19	42	14	20	15	35	57	88	26	19	31
AMAC1	3	2	2	2	3	2	1	3	1	0	3	3	3	0	3	2	1	4	1	2	0	4	1	2	3	0	2	1	2	6	5	6	0	4	3	4
AMAC1L2	1	0	1	1	0	1	0	0	0	2	0	0	1	0	0	0	1	1	0	1	1	1	1	0	1	0	3	1	0	0	0	3	0	2	1	0
AMAC1L3	1	2	1	0	0	0	1	2	1	2	0	1	0	0	1	1	1	0	1	0	2	2	1	0	0	1	0	0	0	1	0	1	1	2	1	0
AMACR	24	29	73	123	120	413	71	69	155	64	24	15	51	79	123	91	144	40	112	140	368	159	164	74	149	87	100	103	127	103	186	111	311	113	124	122
AMBN	1	5	7	34	2	4	8	5	2	3	6	1	6	1	3	6	4	4	17	0	2	3	3	5	26	4	6	1	5	533	4	3	2	4	2	3
AMBP	2	3	0	0	3	5	3	0	2	1	0	1	2	1	0	3	2	0	4	2	1	6	2	2	1	3	4	0	1	2	2	9	2	4	1	1
AMBRA1	49	83	153	173	187	139	55	42	112	49	72	16	75	76	87	102	128	43	152	114	95	222	172	95	128	186	106	103	108	139	130	199	215	122	148	118
AMD1	25	37	313	158	197	231	119	134	285	123	18	15	231	319	419	357	239	93	255	386	612	867	408	202	401	359	368	282	417	377	465	405	383	367	397	386
AMDHD1	9	3	11	1	4	13	15	12	16	6	4	1	10	1	16	6	12	5	7	16	6	10	19	9	30	11	7	11	14	19	4	17	18	15	3	13
AMDHD2	2	1	7	14	10	10	7	0	13	7	2	1	1	10	3	5	7	6	8	17	6	21	16	4	10	2	6	8	10	15	19	13	17	13	5	8
AMELX	1	0	1	1	2	1	0	0	1	1	0	0	3	1	1	1	1	1	3	1	0	1	0	1	4	2	2	0	0	10	0	2	1	3	0	2
AMELY	0	0	1	0	0	0	0	0	2	3	2	1	0	0	1	0	1	0	0	0	0	2	1	1	2	1	1	0	0	1	0	0	0	0	0	1
AMFR	31	42	114	199	152	230	122	106	244	98	27	8	147	280	240	157	206	58	193	213	222	300	200	104	254	169	300	240	248	151	195	318	235	256	197	249
AMH	3	5	1	4	5	5	5	7	6	3	1	0	5	1	3	0	6	1	2	5	1	9	3	3	6	2	5	3	4	6	4	5	5	4	3	7
AMHR2	4	5	2	2	2	1	2	2	1	2	0	6	1	0	0	2	1	3	4	2	2	3	2	1	3	3	3	3	1	5	0	2	0	1	1	0
AMICA1	29	28	389	54	49	197	110	90	226	137	8	14	93	16	275	331	56	35	176	195	64	535	153	140	76	132	44	138	270	93	173	175	70	287	291	175
AMIGO1	3	10	9	12	8	21	6	4	12	18	3	5	13	14	18	27	29	4	15	10	5	15	7	6	15	14	7	4	31	18	11	40	19	47	5	8
AMIGO2	9	15	16	21	26	62	46	38	42	14	15	9	35	104	41	67	24	20	49	72	181	38	32	32	27	38	27	42	44	40	53	61	51	37	32	29
AMIGO3	5	5	12	14	7	12	6	5	4	12	4	4	7	7	8	11	11	8	10	10	8	26	10	7	14	6	7	10	7	18	11	19	12	6	9	8
AMMECR1	23	32	280	123	108	104	49	61	62	48	32	22	84	120	66	96	103	45	132	140	322	683	146	68	137	228	161	119	116	113	130	98	209	137	176	97
AMMECR1L	24	45	92	185	123	189	110	101	160	88	23	12	114	124	152	129	212	46	132	155	157	192	155	99	171	111	166	145	162	104	175	221	272	154	166	156
AMN	2	4	3	3	4	2	2	2	2	1	2	0	3	2	1	1	4	0	4	4	4	4	5	2	3	3	4	1	2	1	1	2	4	6	2	8
AMN1	11	11	46	43	36	50	48	49	61	46	15	12	39	58	86	93	47	20	67	92	94	148	75	78	112	109	50	57	72	80	94	119	42	105	69	129
AMOT	40	113	60	341	471	65	156	232	282	107	68	30	307	55	458	354	1466	128	232	181	303	230	445	237	310	331	966	556	306	388	339	660	1321	439	253	715
AMOTL1	74	183	126	762	415	553	489	288	538	359	103	28	389	415	650	576	672	204	470	541	511	485	660	473	717	545	693	563	890	371	1260	960	936	711	598	662
AMOTL2	37	109	62	143	165	156	180	68	242	150	46	25	111	52	176	458	154	74	204	179	95	125	186	223	195	299	191	145	313	158	157	452	127	331	174	240
AMPD1	3	2	36	14	15	8	13	1	4	9	4	8	191	5	216	65	3	4	9	15	9	35	5	8	4	19	4	115	18	8	10	33	1	3	90	2
AMPD2	12	72	54	140	114	103	28	39	84	41	30	18	68	84	53	68	206	35	54	91	104	99	119	46	145	93	78	63	73	195	129	116	109	107	91	95
AMPD3	39	44	572	111	116	184	56	61	118	62	30	22	66	28	116	82	66	41	129	236	91	1023	153	77	204	233	28	71	90	150	206	95	125	174	356	110
AMPH	33	31	17	72	19	134	22	83	57	21	55	5	19	13	29	15	272	19	156	64	132	38	163	39	47	24	46	54	35	49	180	44	432	85	40	83
AMT	7	27	45	32	49	51	30	17	35	24	4	2	62	33	49	72	39	15	57	54	21	84	44	62	13	140	9	14	48	34	55	82	62	118	34	39
AMTN	4	1	0	1	5	5	0	0	4	2	2	0	4	12	4	2	4	1	3	3	0	3	3	2	5	2	2	0	5	2	5	3	4	4	5	2
AMY1A	0	0	0	0	0	0	1	0	0	0	0	0	1	0	0	0	0	0	0	0	0	0	0	0	0	0	0	0	3	0	0	1	0	0	0	0
AMY1B	0	0	0	0	0	0	1	0	0	0	0	0	1	0	0	0	0	0	0	0	0	0	0	0	0	0	0	0	3	0	0	1	0	0	0	0
AMY1C	0	0	0	0	0	0	1	0	0	0	0	0	1	0	0	0	0	0	0	0	0	0	0	0	0	0	0	0	3	0	0	1	0	0	0	0
AMY2A	0	2	1	1	0	0	1	1	0	0	0	0	1	0	0	2	0	1	0	0	0	1	1	0	2	2	0	1	0	0	0	1	0	2	2	1
AMY2B	6	19	27	7	26	33	14	12	10	9	7	4	29	11	16	80	7	20	25	25	7	23	34	43	6	78	3	25	65	11	12	48	10	78	16	24
AMZ1	8	9	11	17	16	16	13	15	7	9	9	9	7	6	8	8	7	9	10	20	10	5	16	14	20	17	17	12	17	17	11	14	18	18	5	24
AMZ2	40	114	119	269	264	345	221	238	333	173	58	19	167	603	339	281	412	100	282	267	709	370	412	189	480	232	344	312	327	333	431	432	588	247	321	513
AMZ2P1	14	47	37	48	65	85	81	48	69	49	22	8	55	28	91	88	42	14	69	102	110	105	68	64	113	93	75	76	105	121	120	122	106	75	82	179
ANAPC1	22	70	139	197	158	161	95	83	159	89	38	21	138	279	150	220	298	85	154	158	228	258	178	151	281	207	301	159	198	162	216	255	411	236	179	171
ANAPC10	6	7	32	38	29	42	25	33	50	32	5	7	13	31	57	33	25	23	34	40	89	35	56	15	118	25	22	52	53	50	77	43	82	47	34	69
ANAPC11	13	22	75	233	105	187	101	123	237	91	11	9	74	134	153	63	101	30	136	139	302	280	133	70	380	73	185	283	175	210	278	221	441	135	211	352
ANAPC13	19	36	88	221	166	291	141	156	323	152	12	16	135	405	306	170	181	35	180	244	238	308	301	125	301	156	265	391	270	304	362	364	301	181	225	333
ANAPC16	35	52	171	208	185	283	188	126	251	171	21	33	146	187	311	249	91	58	193	219	355	392	180	192	354	251	210	249	297	307	350	415	250	280	258	382
ANAPC2	8	7	10	6	12	6	14	8	7	7	4	4	3	7	6	4	13	8	7	9	6	18	7	5	3	12	26	5	7	9	6	11	12	11	4	2
ANAPC4	40	79	239	152	209	266	101	73	126	103	42	14	134	127	153	204	194	70	239	213	139	279	189	195	251	278	236	193	202	199	189	241	211	357	161	176
ANAPC5	56	253	290	278	563	443	146	174	268	118	42	24	266	333	286	228	282	156	362	299	277	421	335	262	467	381	476	327	272	281	345	407	286	423	430	311
ANAPC7	22	93	201	186	221	302	159	117	208	113	66	22	172	222	201	135	248	67	212	210	214	373	240	130	338	245	227	207	193	278	374	301	263	243	229	228
ANG	4	7	16	40	14	32	16	25	43	19	3	5	9	35	31	43	21	13	25	32	57	25	28	16	63	30	43	34	33	13	16	63	35	22	15	40
ANGEL1	15	61	66	168	108	160	75	39	109	59	27	15	53	65	124	74	104	71	117	146	96	79	147	89	201	181	182	84	86	119	99	145	165	136	133	102
ANGEL2	33	37	154	172	102	160	115	68	142	78	18	17	124	190	168	196	94	70	122	210	119	200	143	141	149	137	196	136	212	112	192	228	178	258	158	186
ANGPT1	68	122	215	615	409	654	554	177	441	346	178	29	208	554	281	928	452	164	642	351	341	461	316	165	1018	168	524	728	996	1864	688	440	1077	416	562	802
ANGPT2	60	186	113	1086	321	497	512	295	767	483	72	40	235	182	291	246	926	192	352	438	420	197	529	373	2904	290	550	140	272	321	480	432	318	318	306	866
ANGPT4	1	5	4	1	5	3	8	1	7	3	8	3	6	1	7	13	3	7	6	2	1	5	7	17	9	7	4	3	14	1	8	42	3	15	4	10
ANGPTL1	11	27	39	62	53	121	38	29	69	32	13	6	72	32	141	59	359	21	71	84	261	124	157	81	33	61	58	218	57	59	124	139	112	59	70	42
ANGPTL2	94	149	148	737	315	2122	530	753	656	429	54	38	288	82	516	496	3228	169	500	623	1958	850	1347	356	733	183	762	511	556	294	768	566	2474	309	650	856
ANGPTL3	4	8	4	19	18	7	6	10	4	7	7	7	15	10	10	9	7	27	21	9	3	14	13	8	11	24	9	4	8	40	8	11	12	29	4	2
ANGPTL4	7	7	14	203	12	16	8	14	16	4	16	3	7	4	25	22	93	8	13	31	32	32	18	19	406	45	31	39	23	4	21	63	22	48	90	65
ANGPTL5	4	6	7	6	10	16	16	11	22	9	2	3	17	4	26	15	11	6	11	8	4	29	11	22	6	11	5	51	5	10	35	9	15	12	2	7
ANGPTL6	1	14	25	43	32	53	36	6	39	39	5	4	20	19	53	24	51	7	41	32	26	52	51	28	39	31	29	36	21	39	30	43	55	51	32	41
ANGPTL7	6	9	13	25	28	59	61	18	6	11	10	6	37	9	38	53	167	13	21	14	0	129	18	32	33	17	81	30	24	12	27	23	4	26	2	7
ANK1	35	28	1644	28	69	108	47	52	66	69	22	22	103	45	96	55	54	40	51	75	44	2729	53	80	20	569	23	183	173	26	27	57	23	170	548	29
ANK2	41	262	126	98	158	170	347	123	299	198	54	55	303	55	557	712	569	200	194	213	241	394	184	562	292	691	332	690	940	148	248	1123	137	714	492	352
ANK3	77	297	131	162	215	95	253	105	203	151	109	52	452	610	601	1072	241	256	269	234	62	231	150	768	774	1179	129	339	432	380	305	1952	245	1246	284	261
ANKAR	14	44	59	99	47	58	71	40	43	38	13	12	80	39	61	134	33	67	99	83	70	84	96	141	117	204	89	106	92	45	81	111	72	178	58	115
ANKDD1A	10	41	75	75	53	81	68	36	97	67	16	9	61	26	76	125	31	19	96	64	66	46	77	73	68	117	64	58	84	30	107	98	98	126	48	75
ANKFN1	1	3	7	15	6	3	19	3	12	8	6	2	7	4	11	29	67	4	11	8	5	9	16	29	8	45	23	68	11	19	18	16	85	35	7	18
ANKFY1	63	163	409	522	419	556	367	247	618	268	132	48	384	385	398	457	767	165	588	528	483	640	751	409	462	598	215	407	565	522	603	813	782	692	462	474
ANKH	129	461	522	1104	1602	1197	557	645	1211	329	152	77	1162	418	2981	1653	1303	409	1276	1113	1357	1205	1220	3044	3708	2743	1079	918	1406	988	1607	7734	1347	2115	1122	2195
ANKHD1	311	971	1797	943	1673	1659	1100	668	1312	800	619	108	1105	1326	1542	2248	2129	788	1830	1752	1870	2920	1945	1697	1798	2311	1197	1219	1705	1677	1577	2265	2962	2338	1664	1416
ANKHD1-EIF4EBP3	312	962	1774	926	1676	1645	1097	664	1301	791	616	106	1097	1315	1540	2200	2136	790	1817	1731	1838	2859	1939	1687	1776	2279	1201	1222	1686	1638	1573	2257	2949	2321	1624	1391
ANKIB1	109	269	367	999	642	896	581	418	1025	510	152	34	408	457	733	839	1165	339	849	972	1432	831	1009	556	1062	833	918	873	966	776	849	1274	1286	921	820	1253
ANKK1	0	5	6	4	3	5	4	7	3	0	2	3	2	1	5	6	2	3	2	4	3	3	2	3	5	4	2	1	1	3	4	4	2	1	2	3
ANKLE1	8	18	239	9	17	16	16	9	6	5	9	3	11	7	11	13	9	17	6	16	10	528	10	23	4	123	12	18	26	4	6	8	4	44	122	14
ANKLE2	69	143	306	355	396	402	216	182	346	190	167	20	243	316	332	315	276	93	264	340	519	428	425	259	714	282	336	248	272	347	306	389	427	325	280	236
ANKMY1	7	13	16	21	20	19	14	7	3	15	11	7	18	16	13	11	1	10	19	7	5	18	11	19	8	21	18	15	22	23	14	33	19	26	20	8
ANKMY2	17	48	115	148	199	157	94	72	145	93	27	11	60	94	186	194	120	45	209	149	171	172	175	121	298	173	225	156	198	156	219	289	206	194	122	197
ANKRA2	29	51	85	70	147	115	51	33	72	45	22	9	71	170	132	184	119	69	114	121	107	189	160	96	124	176	131	128	130	135	148	172	85	151	90	129
ANKRD1	7	2	2	31	15	7	4	5	14	11	12	0	159	14	1310	19	10	11	28	39	16	23	22	10	10	3	6	710	5	4	5	5	2	6	4	6
ANKRD10	27	83	181	131	232	338	110	99	164	84	41	12	213	113	240	202	60	98	300	368	325	219	231	240	250	349	143	131	197	251	124	249	238	365	191	226
ANKRD11	328	909	954	1769	759	853	596	454	787	578	1186	87	771	983	661	884	806	475	933	694	883	1440	1166	839	1562	1044	865	649	915	1035	1025	1216	1013	1073	891	931
ANKRD12	619	928	1580	1612	1264	2111	1493	800	1995	1207	864	127	1097	903	2002	2840	1926	1221	2251	2056	1771	3558	1640	1816	2705	2573	1347	1719	2736	1979	2469	3406	2690	2646	2131	2825
ANKRD13A	47	72	368	220	296	492	201	187	346	199	50	16	176	132	317	297	300	81	351	438	317	705	396	224	418	332	279	288	335	324	299	423	332	357	443	303
ANKRD13B	7	9	10	16	33	23	12	17	23	10	6	6	19	42	15	8	29	8	16	28	9	22	26	24	23	20	47	31	15	10	23	21	22	19	8	20
ANKRD13C	39	115	116	247	168	233	137	131	232	107	75	21	165	207	269	312	437	140	341	277	463	332	303	242	719	406	270	277	348	469	362	634	464	333	285	433
ANKRD13D	8	24	37	18	26	27	8	11	20	13	20	5	15	4	18	22	3	9	22	18	16	41	25	20	32	43	16	19	14	12	20	17	16	34	22	14
ANKRD16	4	12	9	19	15	14	20	8	8	8	8	7	26	26	28	18	22	6	7	5	16	24	12	13	21	20	26	16	22	10	14	25	16	17	13	18
ANKRD17	351	915	1327	1784	2004	2162	1442	1010	2136	1080	513	144	1296	1419	1880	2183	6274	864	2122	2193	2555	3121	2782	1891	3333	2388	2561	1900	2377	1886	3051	3581	4136	2683	2165	2937
ANKRD18A	6	3	326	8	12	16	11	16	2	4	11	4	12	27	11	17	12	4	12	9	3	188	6	22	8	114	9	12	25	6	12	9	5	37	104	10
ANKRD19	3	26	16	49	35	27	24	29	42	30	11	3	23	14	32	26	26	15	28	37	21	52	48	23	51	54	55	37	38	71	60	70	35	45	28	67
ANKRD2	1	2	3	4	1	1	3	4	2	3	2	0	61	3	22	5	8	4	5	3	1	4	1	1	0	3	2	14	3	2	4	3	2	2	3	1
ANKRD20A1	1	1	1	2	0	1	1	0	0	0	2	0	0	0	0	0	0	0	0	0	2	1	0	0	1	0	2	1	1	0	2	0	2	2	1	0
ANKRD20A2	0	0	0	1	0	0	0	0	0	1	0	0	0	0	0	0	0	0	1	0	1	0	0	0	1	0	1	0	0	0	0	0	1	0	0	0
ANKRD20A3	1	1	1	2	0	1	1	0	0	1	2	0	0	0	0	0	0	0	1	0	2	1	0	0	1	0	2	1	1	0	2	0	2	2	1	0
ANKRD20A4	1	4	4	0	0	1	1	2	1	0	1	2	0	2	0	0	0	1	2	0	0	5	0	1	0	2	0	3	0	0	1	1	2	0	3	0
ANKRD20B	1	2	5	0	3	2	4	1	1	5	3	0	7	2	4	3	2	2	6	10	0	6	3	1	5	5	8	1	8	2	11	4	5	5	7	3
ANKRD22	7	4	118	8	8	28	9	13	21	16	4	14	5	13	23	9	11	12	10	16	33	282	14	28	12	39	11	13	14	41	11	15	11	39	102	12
ANKRD23	13	7	6	57	14	13	7	12	9	7	9	4	63	11	229	34	12	7	23	12	7	16	7	17	12	7	19	127	6	19	16	17	28	20	6	16
ANKRD24	8	9	13	7	13	8	4	4	12	10	10	8	9	8	7	6	5	7	9	8	6	10	4	4	9	11	12	15	9	7	12	11	13	13	8	9
ANKRD26	103	256	113	311	426	254	211	156	224	134	192	24	321	252	319	369	241	246	372	367	406	313	337	392	531	536	695	328	391	322	544	423	403	442	320	455
ANKRD26P1	19	9	8	15	18	6	4	10	8	12	12	6	7	4	16	12	9	6	13	10	7	17	14	11	10	8	21	12	10	11	9	13	4	11	6	12
ANKRD27	20	69	157	156	112	156	106	92	148	70	31	17	82	115	135	110	334	65	184	167	239	314	139	95	206	175	247	125	139	188	173	237	256	160	133	153
ANKRD28	60	147	221	182	357	433	274	211	277	192	52	32	335	154	437	437	457	175	413	434	468	450	391	324	874	599	341	254	492	502	389	483	396	552	384	338
ANKRD29	2	14	20	13	14	27	89	12	11	27	5	3	34	8	53	83	31	22	19	55	36	39	29	39	3	61	7	17	48	23	27	58	11	92	19	6
ANKRD30A	7	4	6	2	5	6	9	6	4	4	10	7	1	3	7	5	4	4	4	4	4	5	4	4	7	4	9	2	7	4	6	8	3	13	3	6
ANKRD30B	10	8	9	5	9	9	12	10	1	8	9	11	15	5	8	3	5	7	12	8	8	16	10	11	10	10	14	5	9	8	10	5	7	7	10	6
ANKRD30BL	0	7	3	15	10	4	3	5	5	4	4	3	12	12	5	0	9	8	9	2	7	7	4	4	8	1	10	3	4	9	2	3	18	4	4	5
ANKRD30BP2	6	5	7	2	6	13	6	6	3	5	8	3	8	2	7	4	8	3	1	9	3	7	5	4	8	5	7	4	4	6	3	2	10	5	8	6
ANKRD31	10	12	14	5	15	19	19	12	13	18	13	7	16	6	10	33	30	14	22	23	10	35	12	15	24	34	18	22	23	13	26	20	40	36	17	18
ANKRD32	34	31	107	60	95	81	33	31	64	69	47	17	84	86	62	73	72	35	91	86	46	259	91	73	97	91	87	92	81	127	91	94	117	106	93	82
ANKRD33	1	3	4	4	3	5	5	4	6	2	0	5	2	1	2	3	3	3	5	2	0	2	2	4	4	6	3	6	7	4	4	3	1	1	4	3
ANKRD33B	23	21	133	30	26	40	27	35	36	43	26	18	27	43	51	93	39	18	55	34	64	430	47	35	58	73	47	48	53	25	31	45	44	76	118	25
ANKRD34A	16	8	24	27	19	14	16	11	25	12	10	12	13	16	15	15	37	10	18	22	16	8	13	19	34	16	20	18	20	20	46	13	37	15	11	14
ANKRD34B	12	10	47	7	16	7	18	13	8	11	7	6	9	7	7	7	10	4	12	15	6	30	13	10	14	9	16	10	13	10	5	19	12	17	32	6
ANKRD34C	12	10	14	20	17	19	20	11	22	22	27	7	19	13	13	9	15	15	18	20	12	33	11	12	19	10	23	19	19	16	21	22	11	23	16	20
ANKRD35	9	5	11	14	6	11	8	19	25	5	5	2	15	10	25	12	19	5	9	9	7	13	6	7	29	8	17	22	25	5	32	30	39	15	14	19
ANKRD36	27	118	108	68	73	74	43	21	30	30	27	5	81	34	37	110	27	77	93	75	45	72	46	68	83	191	101	60	60	92	90	59	103	175	82	64
ANKRD36B	40	123	105	61	121	151	71	27	21	49	25	14	104	58	35	139	34	97	175	127	41	118	58	166	83	254	116	53	55	82	115	73	91	218	75	48
ANKRD36BP1	10	59	125	100	97	226	98	69	208	99	22	7	126	256	149	226	274	63	216	210	109	288	245	95	292	165	261	150	246	249	272	390	347	238	224	206
ANKRD36BP2	5	5	56	5	14	60	13	3	17	11	3	3	4	5	11	19	2	9	14	15	4	62	5	3	3	11	11	18	37	2	9	9	1	14	101	2
ANKRD37	1	8	12	73	27	32	19	14	33	13	12	3	22	22	69	54	20	9	23	33	69	18	28	21	103	34	45	23	52	23	48	46	40	28	19	70
ANKRD39	1	5	9	42	17	21	15	9	9	12	4	2	14	29	20	11	21	9	18	30	27	40	20	18	58	14	40	20	17	33	20	24	13	35	12	24
ANKRD40	51	88	217	548	382	530	441	302	564	378	43	31	282	431	647	741	616	140	531	526	676	485	620	282	778	465	402	416	817	487	642	757	529	531	494	685
ANKRD42	11	13	29	39	69	62	48	17	52	42	12	7	36	25	62	121	89	35	81	112	66	38	89	55	33	99	40	34	79	27	127	100	162	114	51	60
ANKRD43	8	6	15	11	6	10	9	4	11	12	10	8	11	5	4	6	10	7	11	6	10	8	10	5	9	4	14	5	13	12	15	6	8	9	12	8
ANKRD44	46	112	319	215	305	356	202	133	244	187	74	48	159	82	279	413	189	181	301	274	262	692	326	294	343	466	159	268	416	334	255	463	287	518	440	295
ANKRD45	10	17	12	23	21	5	5	7	26	7	4	2	27	5	26	13	55	15	16	13	30	23	25	30	40	27	18	21	22	88	54	48	45	28	17	19
ANKRD46	16	36	65	178	90	121	97	50	81	74	15	14	62	64	150	158	430	42	98	108	178	214	153	110	305	179	183	143	200	203	209	303	200	166	190	295
ANKRD49	14	13	65	93	72	92	44	43	80	69	16	10	64	47	77	80	49	20	91	93	140	175	82	74	140	97	79	104	88	102	124	129	154	124	111	143
ANKRD5	19	16	18	21	27	84	36	26	87	34	13	9	34	14	50	26	209	9	48	61	60	36	96	34	115	59	99	39	72	196	81	46	81	60	95	83
ANKRD50	160	572	408	1393	1157	1597	968	773	1303	793	219	120	968	2174	934	1000	2448	513	1403	1386	963	1677	1563	1594	2481	1847	1476	1405	2112	1372	1457	2706	2139	1686	1780	2111
ANKRD52	32	66	96	224	218	234	113	102	184	88	69	41	162	369	171	174	292	49	220	205	289	246	219	155	217	234	191	125	141	200	172	265	291	213	165	134
ANKRD53	7	3	6	2	8	12	4	7	6	10	0	1	6	2	5	8	8	3	7	7	4	10	3	7	8	3	3	2	14	8	7	5	4	1	4	9
ANKRD54	2	16	23	56	39	42	21	35	39	30	9	10	35	33	24	18	47	10	31	19	40	56	35	10	86	27	47	46	26	53	53	28	61	39	31	39
ANKRD55	1	2	25	5	10	1	3	6	5	5	4	4	4	7	11	10	5	3	13	8	2	22	5	3	7	10	4	0	5	6	3	9	8	15	6	10
ANKRD56	10	6	5	8	10	8	9	10	4	5	8	6	2	7	3	5	5	5	11	15	3	10	3	7	17	11	13	8	9	11	9	15	7	9	8	13
ANKRD57	13	9	14	87	49	72	66	69	79	40	17	17	123	516	87	148	110	25	55	69	120	61	88	56	121	49	60	42	80	62	129	91	134	62	44	84
ANKRD58	4	2	20	10	7	12	7	7	15	2	6	0	6	3	8	1	6	2	8	3	9	32	12	1	4	7	4	4	4	5	15	7	7	9	5	11
ANKRD6	26	32	54	58	82	105	101	44	74	56	17	13	45	86	119	111	42	41	103	86	80	101	84	89	106	89	66	68	117	112	107	145	115	94	86	122
ANKRD7	2	3	4	10	3	1	2	2	5	5	1	0	0	1	3	1	7	1	1	4	2	4	0	1	13	1	4	9	1	4	4	6	5	3	0	2
ANKRD9	8	1	8	4	5	8	2	2	0	4	0	7	3	5	3	3	4	4	6	7	4	15	7	2	6	2	14	7	4	7	7	6	5	7	3	2
ANKS1A	68	105	173	218	171	218	169	99	214	144	47	34	106	125	146	193	173	72	254	229	216	235	191	109	259	214	154	104	253	215	268	219	150	232	247	158
ANKS1B	12	16	20	16	37	20	30	13	22	30	12	16	41	16	23	27	29	12	31	29	18	40	26	18	47	24	28	39	28	17	29	30	38	24	28	18
ANKS3	11	13	21	17	15	23	18	12	5	10	6	5	13	14	12	16	10	12	19	22	9	17	16	9	12	14	23	17	16	27	15	26	15	18	8	10
ANKS4B	2	9	6	5	7	6	8	4	6	9	5	6	4	6	5	5	6	6	6	5	4	6	0	3	6	5	3	7	3	3	7	7	7	7	9	3
ANKS6	22	59	36	166	58	76	57	47	73	40	25	24	80	62	68	66	102	47	90	109	110	74	130	73	115	61	98	73	97	59	82	120	192	111	61	86
ANKZF1	31	34	112	115	86	76	40	27	45	25	22	3	47	60	56	61	47	19	57	103	48	99	53	75	42	85	67	53	76	65	76	59	71	131	38	56
ANLN	111	104	1100	659	828	275	113	239	353	139	354	37	277	688	317	99	1017	144	430	295	1578	1807	440	198	1262	407	420	240	149	399	349	169	2107	290	792	343
ANO1	11	52	14	30	31	56	59	44	90	57	13	14	42	18	79	81	52	57	48	47	54	33	63	49	159	85	98	57	80	69	41	170	28	111	90	140
ANO10	11	57	123	75	72	143	48	48	87	52	13	7	58	88	70	47	189	41	80	101	88	200	125	81	99	88	105	58	95	107	95	141	117	72	133	88
ANO2	7	41	20	24	13	24	62	29	32	57	7	7	51	8	26	38	16	15	37	49	16	19	33	39	15	34	22	33	35	13	23	43	4	27	20	49
ANO3	16	60	18	9	28	18	72	31	27	28	14	8	18	9	37	29	12	43	55	35	17	43	12	51	29	44	12	14	103	47	20	83	14	40	67	116
ANO4	10	7	5	6	6	4	4	4	6	11	8	8	9	7	7	6	18	5	8	7	6	8	4	6	10	2	9	5	10	11	7	6	24	10	11	12
ANO5	94	1498	142	943	1031	103	573	288	2678	266	178	112	578	74	362	402	1653	1281	617	512	61	511	1466	1002	2089	4909	2287	3023	3452	4171	856	5777	1846	1853	6839	3378
ANO6	104	277	539	881	806	1339	969	694	1454	658	164	71	716	820	1236	1656	1324	305	1031	1425	1631	1272	1384	799	1992	1051	750	772	1737	899	1060	2166	1490	1384	1257	1131
ANO7	8	7	18	24	8	10	12	7	9	9	9	4	9	4	10	3	3	3	6	9	4	8	9	10	12	13	18	8	7	12	9	10	9	19	7	15
ANO8	9	13	25	22	20	13	15	20	14	17	14	7	15	8	11	12	23	20	21	26	11	13	19	18	29	21	25	15	26	32	18	40	27	31	20	31
ANO9	5	4	4	5	5	13	7	5	1	7	1	2	7	1	3	2	6	3	5	2	1	1	4	6	1	4	8	1	6	3	1	4	6	8	5	0
ANP32A	82	194	754	837	556	589	607	445	792	475	135	49	354	698	647	673	805	257	582	652	927	2257	823	484	970	736	1097	1206	918	756	895	1437	1028	838	1181	1653
ANP32B	299	544	2658	1237	1405	1522	945	971	1468	902	388	131	851	1759	1547	1243	876	571	838	977	1724	4985	1016	694	2918	1428	2790	2097	1696	1929	2032	2175	1801	1160	1901	2411
ANP32C	2	16	23	22	15	5	10	19	16	9	7	5	6	3	12	9	6	9	8	9	9	34	4	8	13	12	30	11	18	12	16	26	20	11	8	22
ANP32D	0	5	3	2	1	1	1	2	4	1	5	1	4	0	1	4	0	2	1	0	6	4	2	0	2	8	2	3	4	1	1	0	2	5	0	2
ANP32E	147	202	2051	1403	593	829	502	462	834	487	127	98	668	1323	1320	1454	1049	280	778	865	1820	5515	887	614	4068	1284	1391	1162	1242	2163	1187	1468	1849	1046	2225	1453
ANPEP	29	142	304	492	593	453	157	317	406	117	116	20	184	44	469	148	850	142	261	264	275	749	534	482	1378	314	232	192	196	263	404	783	1140	388	452	374
ANTXR1	554	769	626	3197	2880	21228	2584	2694	4693	2172	410	328	1419	1259	3253	1740	8667	849	4095	3250	4913	4000	5731	2039	4588	1541	4706	3217	2744	2303	5517	4596	7120	2352	2998	8317
ANTXR2	105	276	735	891	949	1701	626	625	1466	449	97	68	501	139	996	1287	2109	286	958	929	1163	1443	1297	1108	2185	1545	632	806	1289	1078	1307	2818	1758	1497	1356	1400
ANTXRL	2	1	1	2	2	1	4	1	1	2	2	0	2	3	2	1	5	3	1	0	1	6	0	2	2	3	3	2	1	2	2	2	1	2	1	5
ANUBL1	12	23	111	32	52	68	43	28	96	52	13	6	32	36	78	94	78	23	80	95	58	171	56	46	32	88	34	66	123	59	139	102	107	99	88	106
ANXA1	286	441	1787	609	1960	3216	1973	2189	3797	1440	150	155	1249	2493	3354	2305	3326	687	2595	3450	5312	5249	3156	1240	2433	1539	1539	1804	2812	2379	3503	3194	3342	1610	3805	2925
ANXA10	4	1	3	1	2	4	3	6	0	3	2	0	28	222	7	3	8	4	6	4	3	9	7	11	3	4	1	2	6	7	0	2	6	7	4	3
ANXA11	35	56	231	206	128	418	196	173	343	151	31	30	128	139	258	155	105	66	204	249	213	451	261	109	98	195	99	128	209	153	278	251	244	191	205	196
ANXA13	1	1	3	6	1	3	3	2	0	0	1	0	1	0	3	1	2	1	4	2	0	1	0	0	20	1	9	6	4	39	3	10	6	0	0	1
ANXA2	200	423	394	1871	1293	3835	1480	1880	3033	1091	194	113	1159	4214	2016	1087	1780	549	2113	3204	5492	1183	3222	1101	2889	701	1729	1753	1586	1570	2511	2325	3379	1165	1694	2998
ANXA2P1	3	9	8	10	14	13	11	4	18	11	3	1	9	17	9	9	9	5	23	26	18	10	18	6	14	18	9	4	16	3	13	14	13	13	13	20
ANXA2P2	49	87	89	391	288	916	452	388	876	283	37	14	284	971	475	275	530	146	569	877	1242	324	838	263	795	198	422	314	425	430	628	545	889	277	443	711
ANXA2P3	3	2	3	14	9	27	11	15	35	13	1	3	8	25	14	3	16	3	21	34	48	13	21	3	10	6	11	12	11	12	22	27	45	5	19	10
ANXA3	2	7	637	4	22	44	22	15	26	18	7	11	36	8	47	42	15	10	22	29	29	1209	7	43	9	166	9	59	78	11	25	33	4	123	538	19
ANXA4	98	130	417	543	356	1034	439	476	1029	384	39	57	533	625	833	554	820	156	803	1043	1159	1058	843	404	565	572	682	749	542	930	944	1111	1394	609	614	808
ANXA5	419	561	839	1522	2468	4568	1804	2486	4428	1451	328	170	1345	3207	2722	1712	3686	717	2846	3803	6526	2179	5070	1224	7318	1346	3357	2790	2413	3540	5492	3364	6924	1885	2699	4437
ANXA6	48	147	186	320	390	616	350	301	534	286	72	50	250	182	284	271	552	177	288	491	677	501	576	230	987	290	275	253	482	317	560	746	652	407	483	608
ANXA7	74	102	402	298	372	740	505	320	846	342	55	39	390	579	774	721	311	135	606	859	992	925	758	371	670	389	411	425	699	690	775	1035	713	673	662	710
ANXA8	0	0	0	0	0	1	0	0	0	1	0	0	0	7	0	0	0	0	0	0	2	0	1	0	0	0	0	0	2	1	0	0	0	0	0	0
ANXA8L1	0	0	0	0	0	1	0	0	0	1	0	0	0	7	0	0	0	0	0	0	2	0	1	0	0	0	0	0	2	1	0	0	0	0	0	0
ANXA8L2	0	0	0	0	0	0	0	0	0	0	0	0	0	10	0	0	0	0	0	1	4	0	0	0	3	0	0	0	0	0	0	1	0	0	0	0
ANXA9	1	1	9	4	10	4	3	2	4	0	0	1	6	2	3	7	10	0	4	6	8	11	3	5	7	7	7	9	3	6	10	11	6	2	9	6
AOAH	16	45	186	76	99	151	100	42	270	83	9	13	41	34	101	139	63	37	158	205	86	271	213	75	105	115	52	85	200	148	126	151	122	245	149	84
AOC2	19	134	14	43	95	23	33	40	182	17	6	14	39	25	47	70	439	71	34	35	2	63	98	85	415	262	158	66	101	661	81	337	111	132	293	109
AOC3	32	204	110	176	159	154	563	174	269	325	28	28	210	28	286	1117	154	174	232	329	282	268	136	153	307	215	127	105	767	375	110	470	61	370	286	168
AOX1	9	6	23	31	18	146	22	15	32	18	7	8	41	17	62	54	48	4	77	66	69	38	12	16	22	27	9	36	39	7	12	28	9	33	23	6
AOX2P	1	5	95	2	18	6	5	6	7	9	4	5	4	3	11	5	5	8	8	12	6	215	10	43	5	74	6	8	4	2	4	16	8	65	15	4
AP1AR	26	22	57	105	149	112	93	73	161	80	19	12	65	110	147	106	64	46	126	148	201	210	133	78	283	114	209	171	217	147	237	177	262	179	120	207
AP1B1	57	50	151	270	189	326	124	133	500	150	63	23	87	112	194	129	366	63	361	351	267	424	334	117	385	111	205	154	210	357	466	261	364	237	207	255
AP1G1	123	329	794	804	784	1033	510	442	951	454	59	67	581	796	807	887	1075	249	972	1077	962	1392	1296	657	1344	947	964	788	958	878	1100	1343	1138	1117	1032	928
AP1G2	23	34	144	59	50	71	40	30	47	27	26	15	39	76	31	93	31	40	87	116	37	198	55	54	99	134	44	30	46	54	68	82	60	140	89	37
AP1M1	12	15	51	93	46	59	29	27	39	21	10	6	30	45	31	32	60	25	44	44	43	114	42	38	67	48	49	61	60	55	63	66	96	73	60	67
AP1M2	1	0	4	3	0	3	2	3	2	3	0	1	0	2	1	1	4	2	1	3	3	0	1	2	2	1	4	3	1	2	5	3	2	3	1	1
AP1S1	12	4	5	16	18	15	2	14	18	7	4	3	12	17	11	4	18	5	6	15	18	18	24	16	16	11	14	13	15	25	21	13	24	12	8	11
AP1S2	41	46	197	133	159	256	163	174	453	202	30	20	234	263	413	326	265	87	349	422	401	661	334	184	419	213	240	285	461	468	567	484	509	404	462	459
AP1S3	10	7	10	11	10	24	10	8	19	18	6	4	18	43	19	12	20	3	23	24	28	39	10	17	30	23	15	21	12	32	44	19	17	19	24	27
AP2A1	14	28	115	78	64	91	46	23	81	32	21	4	39	90	43	65	57	19	53	64	36	212	56	31	96	53	56	24	65	50	93	71	154	82	75	61
AP2A2	34	47	67	183	140	219	105	57	196	64	25	15	72	74	83	67	163	67	218	179	118	135	158	80	183	117	91	120	149	165	224	208	173	149	115	164
AP2B1	121	241	1099	904	1075	1441	979	583	1422	709	95	99	709	2129	1117	1162	1806	241	1006	1256	1389	2279	1454	703	1259	1193	1439	926	1305	939	1421	1705	2043	1377	1300	1276
AP2M1	57	113	318	595	388	727	275	249	552	213	67	48	412	1514	485	251	482	141	560	566	582	777	524	235	817	283	946	506	397	648	726	630	1002	418	399	544
AP2S1	15	9	29	71	40	81	25	34	89	33	6	7	18	45	35	5	51	11	59	57	51	87	56	14	127	20	71	46	29	50	96	61	60	19	39	84
AP3B1	109	261	468	408	737	937	438	401	775	264	209	34	419	1095	560	534	957	309	730	833	637	1024	1038	440	848	680	641	464	621	1074	919	861	872	676	891	752
AP3B2	3	3	6	2	8	6	4	7	4	2	2	5	34	112	1	10	19	10	4	8	2	8	6	9	6	7	6	1	6	3	4	2	4	9	4	4
AP3D1	62	149	135	335	258	243	123	153	217	160	122	27	160	297	217	150	371	142	245	221	262	393	376	180	453	195	436	224	249	595	411	295	503	243	274	292
AP3M1	70	244	516	469	569	796	471	451	838	390	95	65	438	1020	707	624	596	251	691	905	880	1311	819	630	876	741	701	529	792	649	994	1191	1000	839	1020	890
AP3M2	24	39	79	69	98	109	87	53	133	83	24	10	79	84	133	119	171	48	66	97	62	105	97	93	191	85	174	130	150	152	114	212	112	135	79	121
AP3S1	26	18	108	180	130	246	101	106	203	89	19	18	106	218	251	152	259	83	223	258	660	575	336	136	455	221	247	306	256	267	444	352	382	197	348	716
AP3S2	30	80	148	196	115	253	159	100	231	106	24	31	108	176	274	222	539	65	184	260	423	318	210	145	374	136	218	209	198	199	213	314	556	260	205	257
AP4B1	20	56	151	142	146	142	91	93	100	55	12	11	88	55	98	131	144	42	127	117	80	212	96	112	143	172	116	78	124	136	117	110	127	174	112	114
AP4E1	48	95	234	197	287	277	119	128	276	127	48	35	183	331	232	236	306	105	256	315	474	470	296	211	383	330	252	213	322	313	411	403	635	323	269	308
AP4M1	4	4	7	18	6	20	8	7	14	8	4	5	9	15	11	3	12	6	13	10	13	16	8	7	34	8	10	9	6	18	19	18	10	11	11	16
AP4S1	9	17	14	27	15	15	15	14	25	10	9	6	12	26	24	17	17	12	21	26	30	34	14	24	39	22	24	20	20	31	13	41	27	28	6	30
APAF1	42	113	757	342	321	322	210	152	374	153	57	25	196	243	258	291	252	95	343	314	216	1187	327	215	675	458	314	240	303	329	358	422	443	409	697	430
APBA1	16	30	24	61	50	73	48	36	96	80	16	15	29	26	44	61	114	28	65	65	44	71	96	51	26	62	27	22	83	45	78	115	47	89	52	106
APBA2	5	14	15	27	10	38	7	17	16	16	14	5	12	19	21	9	10	9	27	18	8	16	28	9	7	30	52	36	14	15	20	54	39	25	12	48
APBA3	7	4	6	5	9	9	12	6	6	3	1	4	2	1	9	6	13	5	3	2	6	8	8	4	10	10	2	6	4	6	9	4	5	6	2	6
APBB1	4	13	7	10	29	39	28	11	35	15	5	2	18	8	36	43	27	5	16	24	19	20	22	15	44	31	12	11	23	24	36	48	20	45	27	18
APBB1IP	32	35	302	157	378	183	167	135	212	158	22	20	101	26	159	297	103	59	224	228	210	999	217	180	174	217	55	249	395	219	318	391	239	347	430	215
APBB2	146	526	239	666	699	2020	1106	545	1083	774	138	79	520	153	911	1660	1279	510	1410	1137	1339	865	1390	827	785	1013	998	910	1287	646	1273	1382	1413	1359	856	1266
APBB3	12	24	11	24	51	20	8	14	16	14	12	4	15	18	14	30	20	5	23	18	7	22	19	30	24	48	8	7	25	14	31	27	28	52	20	22
APC	207	509	1140	896	1261	1525	1131	783	1368	697	316	82	925	776	1314	1768	2800	635	1409	1560	1927	2305	1930	1298	1154	1490	1149	1103	1616	1026	1807	2145	2260	1551	1729	1699
APC2	23	10	42	32	23	27	26	19	18	31	23	17	18	15	17	20	29	26	17	18	15	31	16	17	24	19	23	24	26	30	31	38	27	33	16	26
APCDD1	21	66	25	141	147	373	95	56	365	72	29	20	91	30	114	82	332	85	206	157	183	174	361	120	244	274	430	314	385	242	188	554	438	134	905	289
APCDD1L	8	4	4	116	10	56	6	34	34	4	4	7	10	11	18	7	98	7	11	41	104	12	30	13	21	10	16	9	1	9	17	6	13	6	12	11
APCS	3	0	1	2	0	0	1	0	0	2	0	1	1	4	1	1	2	0	2	1	0	2	0	0	3	0	0	3	2	0	2	3	1	0	1	5
APEH	14	22	96	80	63	92	43	55	93	34	14	5	52	86	84	52	79	34	84	88	93	206	71	47	106	70	92	90	75	74	139	127	143	72	78	129
APEX1	76	111	491	946	638	686	446	443	759	358	67	51	366	999	723	423	722	122	601	639	1065	1783	965	463	1475	322	1343	906	653	782	1051	1074	1518	467	973	1045
APEX2	13	14	35	70	126	86	23	18	64	23	9	2	23	44	44	24	100	15	77	62	89	96	46	16	304	35	46	53	52	62	51	55	103	38	33	44
APH1A	12	15	34	115	62	61	35	61	73	36	21	7	40	82	74	41	88	18	71	118	151	93	102	40	194	53	83	50	74	95	94	122	142	65	96	100
APH1B	21	29	130	70	124	108	83	56	141	77	13	8	62	76	120	192	100	38	95	132	72	232	90	129	133	148	192	126	140	97	201	239	241	181	151	116
API5	40	80	291	284	314	434	256	210	382	222	50	21	311	411	471	499	424	101	524	471	645	888	596	285	619	377	586	345	554	587	595	757	940	428	503	610
APIP	7	9	59	46	22	51	38	39	65	32	4	7	17	42	68	65	31	22	75	60	73	100	83	31	81	32	67	65	63	95	110	56	77	40	62	61
APITD1	16	15	31	52	40	33	21	20	52	22	12	6	29	88	37	38	57	28	44	38	95	51	57	15	154	22	62	50	27	56	122	55	108	34	45	68
APITD1-CORT	10	10	9	44	28	18	17	13	40	16	9	5	25	40	23	24	51	32	24	31	55	38	23	13	118	20	37	37	19	44	62	33	71	19	32	42
APLF	20	34	78	87	121	127	167	72	142	108	15	21	87	98	192	200	189	35	127	131	183	208	90	103	335	112	129	141	198	107	479	267	126	166	164	335
APLN	46	61	38	248	68	85	349	166	1004	955	40	32	29	22	56	25	141	55	74	73	65	65	63	31	208	20	123	38	157	55	136	77	76	41	260	1202
APLNR	68	189	85	164	548	1306	965	705	699	525	60	41	453	72	573	300	372	173	756	1306	421	297	943	345	175	120	142	325	634	413	595	524	463	279	321	393
APLP1	3	6	4	17	15	10	3	15	12	5	4	4	18	10	14	7	186	6	11	8	23	19	14	13	78	8	15	6	7	17	7	14	43	7	12	22
APLP2	418	963	2224	5728	4301	3865	2293	2106	5329	1733	337	256	2304	8028	3794	2919	4047	1024	4459	4374	3291	4403	6125	2641	7677	2696	4030	3001	3312	2988	4800	6631	7565	3871	3332	3416
APOA1	1	0	1	2	1	1	3	0	3	2	2	1	0	2	1	1	2	0	0	1	0	3	1	2	2	0	1	2	3	1	2	2	0	3	1	0
APOA1BP	8	18	33	103	51	68	58	67	103	37	14	4	42	153	101	45	136	10	48	90	238	99	108	53	198	33	86	84	79	105	123	118	170	36	74	109
APOA2	1	4	4	0	4	0	1	1	2	1	0	0	0	0	1	7	0	0	0	3	0	5	0	0	0	2	0	0	3	0	0	0	0	2	6	2
APOA4	2	3	5	2	2	1	1	4	1	2	5	0	2	2	3	2	1	2	2	1	1	4	1	3	3	5	4	4	1	4	6	2	1	2	1	2
APOA5	1	2	1	4	3	0	1	5	2	3	3	3	3	4	3	2	5	2	2	3	3	5	2	2	2	5	5	2	6	1	3	8	1	0	1	3
APOB	28	25	102	34	26	42	203	31	17	55	19	20	27	29	34	588	54	22	54	61	35	69	14	35	36	46	37	31	195	26	36	37	68	52	89	25
APOB48R	9	41	164	46	106	51	31	42	47	21	16	12	33	5	51	37	40	27	49	47	32	253	57	54	118	74	31	38	66	43	99	120	83	67	101	57
APOBEC1	1	1	4	3	3	4	2	3	0	2	1	1	2	2	2	2	2	0	0	1	2	2	0	2	3	0	1	2	1	2	1	2	1	4	1	0
APOBEC2	3	1	29	13	22	5	4	7	4	11	1	2	64	6	76	17	3	6	8	11	6	29	13	13	4	25	9	52	6	8	5	9	5	18	16	5
APOBEC3A	3	4	65	12	19	7	3	2	26	4	1	1	5	8	17	6	6	2	12	3	10	72	2	12	9	24	7	29	30	11	12	4	14	17	40	18
APOBEC3B	1	1	28	25	39	3	0	1	16	9	2	2	2	8	3	1	15	0	14	6	19	50	5	6	9	9	11	16	7	17	11	6	21	9	27	12
APOBEC3C	7	11	57	64	58	113	55	53	107	36	11	1	38	69	63	62	56	19	70	75	89	172	77	50	88	86	75	91	113	135	140	196	128	72	100	126
APOBEC3D	3	2	15	6	29	40	12	9	21	23	2	4	3	4	15	18	7	10	16	5	9	19	16	4	12	27	8	6	13	22	33	28	23	34	11	21
APOBEC3F	12	9	16	47	35	56	28	16	38	25	6	8	25	12	20	58	38	13	41	36	34	67	35	23	29	53	67	37	57	44	50	75	47	50	38	56
APOBEC3G	16	10	33	48	26	93	67	20	103	89	5	4	19	6	49	69	33	17	66	67	85	132	73	19	40	38	41	40	94	121	109	96	66	54	79	82
APOBEC3H	2	4	6	0	8	9	6	2	8	1	2	3	4	2	6	2	2	1	3	6	5	6	6	4	2	1	0	3	0	5	14	6	2	8	4	5
APOBEC4	8	5	8	8	5	12	8	6	7	15	9	8	12	5	3	13	4	9	7	11	6	14	8	15	10	0	8	4	3	33	10	5	9	7	15	5
APOC1	10	9	38	68	193	298	38	117	183	72	6	10	12	17	50	14	78	16	90	309	62	109	215	19	68	4	56	137	43	286	99	17	198	88	58	42
APOC1P1	3	3	1	0	4	3	2	5	1	4	0	3	0	2	1	1	2	1	1	4	2	4	3	3	4	1	1	3	9	1	8	3	5	3	5	3
APOC2	11	6	11	118	156	100	6	7	40	7	10	3	4	9	6	1	15	1	21	53	7	4	24	5	137	13	4	17	10	104	44	42	74	22	3	14
APOC3	2	1	0	0	1	2	0	1	3	4	2	0	0	0	1	0	1	0	0	2	1	1	1	0	1	1	0	1	0	0	1	1	0	0	0	0
APOC4	1	1	3	2	2	0	2	2	0	0	0	1	1	0	1	1	3	2	2	2	1	3	2	1	0	1	1	2	0	0	1	2	0	1	0	2
APOD	28	227	261	426	122	179	1311	174	201	385	41	41	1577	199	2724	1105	286	333	210	501	620	586	156	455	46	412	121	799	948	39	777	439	79	424	116	404
APOE	15	15	34	132	178	210	85	82	230	126	9	2	22	10	86	48	89	31	169	286	63	85	249	56	58	48	61	159	130	193	224	180	283	234	57	100
APOF	1	2	3	7	5	3	6	4	3	3	2	0	0	2	4	0	4	2	5	5	1	5	7	5	2	6	5	3	3	1	6	3	2	2	4	1
APOH	1	3	2	2	1	0	0	2	2	4	0	0	0	1	2	0	2	1	2	1	0	0	0	0	0	0	3	1	2	1	2	0	0	2	0	3
APOL1	46	52	88	74	178	366	221	104	365	156	30	22	159	300	236	160	73	85	335	409	490	208	464	81	108	125	49	107	231	187	241	353	484	331	179	78
APOL2	38	85	132	206	233	369	144	141	283	161	50	20	187	190	267	154	217	72	317	218	335	183	383	116	360	188	203	190	253	275	343	344	406	271	168	171
APOL3	54	69	188	112	189	363	433	175	444	462	41	41	138	54	392	416	100	78	254	276	463	337	331	185	128	265	71	190	702	337	358	500	185	453	209	164
APOL4	23	39	114	361	269	157	96	88	139	110	16	19	78	22	228	55	42	26	43	98	215	153	137	103	324	155	116	182	102	44	312	713	126	150	155	279
APOL5	2	6	3	3	6	0	3	3	1	4	1	5	0	2	2	2	4	3	3	2	2	6	1	2	3	0	6	0	6	5	2	3	3	5	5	2
APOL6	110	112	352	178	421	706	546	248	846	481	83	47	295	160	640	923	634	143	775	600	1234	711	783	379	1094	548	368	509	1211	860	991	1369	1036	921	775	505
APOLD1	28	119	51	188	572	245	123	85	189	140	37	24	249	93	644	1363	255	142	399	860	275	229	336	213	1618	519	205	182	434	406	375	238	328	384	478	300
APOM	2	8	15	7	12	10	6	8	8	6	10	6	5	4	12	9	5	5	6	7	16	21	14	5	4	4	9	4	16	6	7	9	14	4	8	12
APOO	6	2	29	74	71	41	26	48	44	26	5	10	34	96	74	30	115	16	42	59	213	95	60	30	330	26	114	93	46	85	97	86	100	51	69	78
APOOL	67	99	210	297	361	389	278	199	459	223	60	35	222	384	386	384	402	125	337	493	706	605	382	259	507	421	594	415	491	541	465	712	724	380	473	609
APP	584	1502	1515	10765	4080	6976	3032	3009	4705	2243	566	318	2698	5680	4574	3374	17974	1839	4093	4718	5182	5926	6624	3791	7972	3660	10358	4532	4238	4211	4076	9490	15694	5519	5111	4268
APPBP2	68	155	174	424	391	481	410	259	504	276	71	62	313	428	611	737	969	176	586	582	837	684	887	492	1027	662	659	597	796	542	886	1038	1247	667	609	830
APPL1	86	120	440	533	433	610	416	358	613	333	89	47	403	648	722	701	413	190	574	614	694	1150	688	536	975	714	651	672	895	765	846	1354	855	805	794	1216
APPL2	45	138	313	255	447	556	233	225	487	237	56	20	220	289	358	431	294	161	589	485	431	454	586	372	653	450	252	265	455	453	605	663	366	498	389	506
APRT	3	8	26	47	20	46	39	38	71	28	3	4	27	58	66	12	46	4	33	31	63	108	51	5	69	13	58	39	56	24	72	95	60	26	55	42
APTX	17	64	132	204	147	212	91	101	167	95	29	20	88	155	169	106	103	39	152	137	215	218	158	121	240	134	289	157	175	198	270	245	289	170	173	204
AQP1	77	181	627	594	433	1374	1627	633	861	778	69	56	716	127	1567	821	1050	212	761	1365	653	1028	676	343	1266	526	261	408	865	515	361	944	329	603	455	561
AQP10	0	0	8	2	8	4	1	5	6	3	3	3	3	2	4	2	4	1	2	5	2	7	3	3	9	2	5	2	2	2	1	4	3	5	3	5
AQP11	3	6	19	33	30	9	13	2	20	13	6	2	4	15	18	42	13	9	30	23	16	21	17	44	22	26	15	11	22	18	13	21	37	55	14	11
AQP12A	0	0	2	0	0	0	1	1	0	0	0	0	0	1	0	0	1	1	0	0	0	0	0	1	0	0	0	0	0	0	0	1	0	0	1	0
AQP12B	0	1	0	0	1	1	0	1	0	2	0	0	0	0	0	0	0	1	0	0	0	0	0	0	0	0	0	0	2	0	0	0	0	1	0	0
AQP2	5	5	8	10	13	7	8	11	6	11	2	4	5	4	8	7	10	5	6	14	4	4	4	4	3	3	6	6	10	7	8	7	3	11	4	4
AQP3	9	10	149	51	12	48	36	39	61	39	5	5	37	12	96	24	25	8	8	58	19	291	34	38	68	47	30	41	65	31	57	144	14	48	60	80
AQP4	23	14	19	18	21	21	13	21	9	20	19	18	26	6	32	18	34	16	14	25	4	23	11	8	18	17	31	36	15	55	24	12	8	17	13	9
AQP5	4	2	4	3	5	5	2	4	4	3	4	1	5	7	2	4	8	2	7	4	5	13	7	6	10	6	5	5	1	5	6	11	4	3	8	4
AQP6	4	3	4	3	7	0	4	4	4	5	4	2	5	1	4	4	2	4	3	5	0	9	8	6	5	2	10	6	5	5	3	10	3	3	2	10
AQP7	1	0	2	0	0	2	20	12	0	4	0	1	4	0	13	51	2	4	1	8	48	25	4	1	0	9	2	12	66	2	1	3	1	10	14	2
AQP7P1	4	4	4	6	9	5	11	6	2	13	7	7	13	8	10	15	9	5	10	11	10	16	5	12	9	14	7	4	24	6	13	9	2	21	10	7
AQP7P3	2	2	1	1	2	0	2	2	5	1	3	2	0	0	3	4	1	0	2	5	2	3	1	1	0	0	1	1	3	2	1	1	0	3	3	1
AQP8	1	2	0	3	0	1	6	2	2	1	1	1	4	1	3	1	1	1	2	2	0	2	0	5	3	1	2	0	4	3	1	3	0	2	1	1
AQP9	6	10	148	24	17	141	16	51	41	30	4	6	55	14	141	157	21	8	13	103	17	218	27	21	192	50	15	41	74	39	9	43	21	131	176	55
AQPEP	10	15	49	15	13	13	90	8	24	31	8	12	20	21	50	400	22	19	22	76	36	65	12	28	18	57	29	37	332	40	21	82	4	38	66	26
AQR	69	230	471	398	420	511	384	276	558	367	125	33	338	404	474	644	752	315	605	650	855	915	666	500	835	658	593	539	664	553	671	836	1150	712	630	616
AR	8	21	21	45	70	23	27	37	37	33	16	10	33	19	65	110	62	15	38	19	114	42	39	79	22	89	32	44	61	22	71	150	83	102	25	31
ARAF	23	22	87	91	115	128	57	36	97	39	12	4	57	65	91	54	152	26	85	98	102	184	137	48	136	101	88	86	94	94	129	134	147	91	78	90
ARAP1	21	33	120	80	101	117	44	35	75	38	18	11	66	41	59	48	33	20	82	67	41	160	78	69	115	85	68	37	57	59	84	97	59	111	86	44
ARAP2	39	42	252	40	126	187	152	59	192	164	31	20	105	143	142	258	60	91	220	199	71	352	136	108	64	200	45	82	248	174	151	159	87	304	224	119
ARAP3	24	121	128	92	182	109	174	83	117	139	47	21	122	141	141	104	88	63	153	202	54	137	120	137	89	141	74	54	137	72	125	174	97	216	136	171
ARC	8	2	7	4	9	3	4	6	5	3	6	3	3	2	6	3	3	6	2	4	11	7	4	6	8	11	6	7	2	7	7	4	9	5	3	13
ARCN1	247	584	1158	4005	2265	3554	1682	1815	3773	1309	245	175	1365	2640	2740	2197	3962	613	2305	2965	4073	3162	4703	1579	5390	2009	3505	2495	2594	2863	4645	4360	6806	2589	3556	4270
AREG	0	0	0	0	0	0	0	0	0	0	0	0	0	0	1	1	0	0	0	0	0	0	0	0	0	0	0	0	0	0	0	0	0	0	0	0
ARF1	157	204	633	1947	740	1439	577	548	1268	567	106	52	516	1123	857	602	923	231	952	1114	763	1812	1070	403	1849	547	1197	775	859	976	1419	1398	1630	763	1000	1221
ARF3	113	194	450	667	607	780	409	531	819	445	128	54	371	540	679	541	1043	230	708	723	964	1107	1095	587	943	529	500	553	868	691	1285	1332	1049	677	734	808
ARF4	163	206	466	838	574	2230	582	1006	1902	574	141	117	697	1401	1080	647	901	264	1160	1644	2996	1275	2323	656	2361	899	1567	1137	1248	1826	2379	1715	2143	772	2046	2546
ARF5	8	23	36	104	54	53	26	36	45	27	6	13	24	26	31	21	34	25	29	35	39	81	30	22	50	28	55	34	36	23	42	40	66	51	32	42
ARF6	52	51	414	575	306	550	302	249	646	324	45	24	267	489	452	379	441	133	541	696	1095	1603	742	342	1304	491	584	503	726	921	895	858	1117	570	882	974
ARFGAP1	19	22	27	62	76	66	10	30	28	29	12	6	44	39	23	17	75	17	51	64	38	38	39	17	47	40	59	29	22	75	94	40	90	45	20	48
ARFGAP2	17	42	47	52	58	64	36	27	53	30	8	8	23	26	51	47	43	25	55	40	39	129	59	33	57	51	39	48	48	42	85	74	84	53	57	64
ARFGAP3	34	68	128	533	264	389	138	168	337	119	52	33	145	218	201	172	309	80	238	242	398	327	378	136	656	162	425	284	210	557	387	353	360	231	322	465
ARFGEF1	182	471	1162	948	666	770	476	424	727	429	272	70	681	1235	834	1008	1368	457	890	906	815	2471	939	862	1086	1368	836	743	1073	1675	1043	1269	1137	1352	1380	1114
ARFGEF2	150	281	553	1126	1238	816	505	410	739	343	188	76	497	744	730	825	990	292	744	825	674	1149	965	649	1310	812	802	539	826	774	989	1159	1596	911	832	819
ARFIP1	39	60	100	227	206	282	167	92	252	122	27	8	123	100	252	207	193	96	287	214	391	387	322	177	431	222	218	264	332	369	327	431	457	334	268	392
ARFIP2	21	42	37	96	86	77	34	28	66	23	45	10	40	86	41	23	38	25	66	47	52	67	57	30	64	62	52	49	48	69	59	73	87	68	75	46
ARFRP1	3	7	29	36	29	43	15	17	42	21	13	6	15	30	25	21	26	5	22	28	25	38	20	15	24	20	16	11	29	18	65	32	31	32	15	33
ARG1	12	22	663	6	30	27	4	5	14	19	7	12	12	8	22	17	22	8	17	26	16	1019	14	54	3	222	9	55	63	7	6	29	8	94	644	9
ARG2	35	83	264	347	240	368	231	211	498	221	34	35	156	223	380	356	247	82	318	372	562	551	350	163	692	196	300	369	437	399	564	422	619	407	333	443
ARGFX	9	7	9	11	15	8	10	13	4	10	5	4	6	2	8	11	13	10	7	11	8	10	12	6	17	16	13	4	10	7	9	11	11	15	8	11
ARGFXP2	1	2	3	4	3	1	2	3	2	2	2	1	3	3	0	5	2	3	4	4	0	2	1	7	3	3	7	2	2	2	3	4	1	6	3	3
ARGLU1	166	217	416	187	373	289	156	112	166	140	397	42	417	189	270	495	130	218	563	526	184	651	301	481	337	873	356	276	317	540	258	467	368	924	394	331
ARHGAP1	43	88	147	340	185	731	226	195	377	140	21	25	137	203	258	176	333	74	305	340	313	370	407	170	284	193	210	178	228	206	310	369	327	241	298	288
ARHGAP10	45	204	78	198	329	172	124	166	171	99	106	34	137	73	215	222	196	193	169	168	293	131	148	202	371	243	203	210	229	244	617	328	375	326	117	304
ARHGAP11A	82	35	456	214	151	141	59	109	173	64	124	14	188	469	122	76	232	62	238	131	928	899	172	77	600	192	362	292	119	315	237	120	600	158	363	273
ARHGAP11B	17	2	36	10	10	6	4	0	3	2	9	0	4	10	3	1	3	2	12	6	7	24	6	2	7	17	2	9	10	10	3	2	10	10	10	3
ARHGAP12	73	146	143	161	342	213	235	125	303	166	76	34	165	252	423	613	268	167	344	382	295	346	269	316	238	519	325	272	481	372	442	694	321	541	369	416
ARHGAP15	46	50	294	32	90	127	116	57	116	98	21	6	76	18	121	159	42	78	128	153	130	540	122	113	86	170	47	88	136	154	128	163	158	187	243	115
ARHGAP17	36	140	109	374	232	241	171	115	252	111	36	16	127	141	168	196	202	83	187	287	200	394	263	155	173	231	119	132	209	173	291	282	262	286	205	186
ARHGAP18	163	286	276	465	507	779	574	344	1405	513	112	56	222	162	492	396	480	224	1212	933	903	427	816	336	983	371	380	371	551	1021	1177	733	721	628	430	1228
ARHGAP19	35	59	476	144	142	134	139	84	189	117	27	24	105	91	151	222	101	48	176	193	105	794	147	169	221	294	122	116	248	131	170	296	134	311	331	172
ARHGAP20	12	15	24	52	40	45	105	23	46	30	11	14	44	17	80	197	38	22	58	94	51	73	58	34	102	38	32	59	139	28	80	57	59	63	59	45
ARHGAP21	158	666	330	578	1368	865	702	550	1141	573	171	97	633	705	919	1090	965	564	1072	912	1514	685	1198	1343	1179	1331	845	615	1258	688	813	2359	1129	1423	912	1062
ARHGAP22	13	12	8	75	29	90	20	26	55	28	8	2	19	9	17	9	55	11	51	45	59	18	43	12	46	19	36	20	19	40	40	29	56	34	19	41
ARHGAP23	25	94	108	196	167	162	118	107	250	90	33	22	78	46	172	88	204	57	108	178	118	235	191	114	164	266	154	104	205	137	233	314	338	177	190	188
ARHGAP24	62	153	227	164	317	362	311	203	380	203	42	34	144	202	224	217	371	171	244	244	190	477	371	283	303	359	150	204	350	288	276	633	319	400	372	355
ARHGAP25	23	42	407	211	176	274	242	133	401	360	37	40	99	59	253	324	105	60	229	330	203	869	240	132	288	110	84	263	292	245	247	268	165	303	340	215
ARHGAP26	78	237	439	313	309	495	315	180	475	285	83	46	281	102	368	364	560	187	589	887	383	564	575	466	548	448	222	307	520	397	456	526	970	701	485	358
ARHGAP27	17	27	132	74	82	84	80	37	86	67	18	9	74	20	87	85	47	24	81	146	68	287	90	41	64	134	48	43	129	83	99	99	102	181	110	88
ARHGAP28	48	88	53	339	244	607	160	187	276	145	43	21	176	52	166	118	1057	128	447	258	1444	244	589	305	491	156	224	280	257	196	367	481	611	219	365	561
ARHGAP29	120	421	209	460	576	644	894	408	871	812	79	45	547	116	756	931	458	440	1202	1368	801	547	742	628	685	725	559	440	1407	775	665	895	445	933	750	1224
ARHGAP30	95	109	759	213	215	417	223	193	345	243	31	22	148	113	213	202	203	130	417	433	242	1205	409	185	288	358	149	263	410	470	566	273	369	429	502	223
ARHGAP31	91	322	175	484	720	593	558	372	676	458	117	56	370	130	616	705	512	231	673	736	605	330	801	586	695	709	440	331	704	451	779	1096	612	848	462	704
ARHGAP32	76	158	134	474	312	316	114	188	201	106	102	29	223	303	238	268	466	131	320	254	515	357	466	251	416	286	382	213	274	220	409	358	393	344	252	248
ARHGAP33	4	7	26	11	24	20	13	16	10	16	16	17	7	10	19	11	11	7	14	16	5	21	9	17	12	20	14	8	9	19	17	8	10	14	10	18
ARHGAP36	4	2	3	4	3	3	7	7	2	7	3	6	9	8	2	1	12	8	3	8	14	3	3	6	3	4	4	9	4	5	7	6	4	2	5	2
ARHGAP39	11	7	8	22	11	11	16	16	12	12	10	6	13	13	14	17	18	13	22	8	19	13	19	18	21	15	19	9	17	11	29	16	15	15	6	13
ARHGAP4	5	10	54	16	15	49	28	17	22	17	11	9	27	1	13	32	26	10	30	29	14	85	31	14	35	40	15	15	33	23	51	37	16	34	29	31
ARHGAP40	2	6	4	4	6	9	4	9	3	3	2	3	3	3	2	2	3	2	2	3	4	6	3	4	6	2	4	4	5	1	7	3	6	2	4	1
ARHGAP42	27	84	106	231	183	271	165	96	180	108	76	28	90	117	181	291	315	95	148	163	177	288	296	181	309	270	247	182	211	214	170	274	596	261	235	214
ARHGAP44	13	36	24	43	49	44	31	22	55	27	31	10	40	13	43	93	89	50	49	45	38	51	99	86	296	128	50	35	73	117	30	178	104	158	79	162
ARHGAP5	145	407	440	1537	711	909	1024	560	1036	563	313	90	745	1293	1743	2440	1564	537	1421	1227	3573	1729	1636	1410	4994	2238	1615	1531	2498	2117	2590	3755	2672	2021	1758	2804
ARHGAP6	17	39	74	31	50	37	70	34	49	81	14	12	43	17	73	99	77	27	57	65	41	55	56	50	57	86	52	75	132	55	45	66	59	114	58	42
ARHGAP8	3	0	4	7	8	7	6	2	10	6	1	2	1	2	1	3	1	2	7	5	5	8	4	3	4	4	5	3	3	0	14	10	3	1	4	5
ARHGAP9	18	47	499	78	100	142	70	58	101	72	20	10	75	26	82	89	34	19	113	90	62	342	69	63	73	157	32	52	93	73	134	69	59	139	188	72
ARHGDIA	17	35	69	146	94	214	78	101	200	83	17	14	64	87	91	85	276	40	139	220	245	272	285	78	245	80	160	121	122	133	352	251	401	122	201	262
ARHGDIB	352	436	3270	1576	1125	2183	1913	1095	2739	1632	147	184	751	376	1969	1466	855	535	1810	2159	1683	9663	1847	852	2549	1250	764	1307	2290	2042	2727	1933	1672	1793	3187	2261
ARHGDIG	2	2	1	1	0	2	2	3	0	1	2	1	1	0	1	1	3	0	0	1	1	1	1	2	3	0	0	1	2	0	1	4	1	0	1	2
ARHGEF1	12	36	90	60	45	74	36	32	58	48	31	9	41	37	41	38	35	39	58	69	37	103	37	54	98	89	39	50	47	46	71	56	54	91	67	60
ARHGEF10	71	258	96	595	248	411	330	188	441	230	58	25	225	168	297	308	528	143	372	350	371	219	443	331	446	353	439	249	463	200	338	552	216	379	355	486
ARHGEF10L	16	16	29	73	48	66	24	34	71	33	19	12	26	24	36	36	39	19	50	52	26	20	55	17	101	48	35	24	43	56	65	55	44	57	28	56
ARHGEF11	111	225	216	699	490	344	160	170	442	149	128	41	246	301	283	276	597	130	448	321	358	300	473	265	631	282	255	232	279	306	375	470	728	299	292	410
ARHGEF12	348	1088	2052	2128	2199	2479	2005	1353	2392	1560	409	208	1636	1676	2737	2308	2877	1029	2235	2441	2759	3966	2671	2050	3715	2564	2872	2714	2804	2312	2593	4323	3921	2843	2548	3725
ARHGEF15	14	60	42	98	100	127	200	75	108	143	17	11	90	16	125	152	66	37	148	192	72	105	84	82	43	111	50	47	195	71	110	158	43	236	109	93
ARHGEF16	4	1	6	2	4	5	4	5	4	5	0	3	4	1	3	6	5	5	5	4	2	9	2	2	5	6	9	5	11	7	5	13	6	4	5	4
ARHGEF17	30	109	45	282	196	169	195	110	195	183	78	29	117	53	155	172	190	65	187	177	102	109	227	162	297	183	210	141	183	115	216	308	151	305	160	275
ARHGEF18	27	22	154	270	133	136	73	52	126	60	52	20	64	90	86	75	242	43	65	88	57	435	117	81	136	100	188	143	125	138	134	158	235	129	120	116
ARHGEF19	5	20	11	91	45	39	10	9	23	9	8	2	30	10	60	36	66	16	27	16	26	29	54	29	36	52	30	36	17	22	67	100	32	40	20	38
ARHGEF2	67	85	314	374	323	333	173	156	323	195	43	40	185	135	294	316	373	91	285	244	456	720	348	198	397	322	232	189	356	283	427	436	324	310	321	349
ARHGEF25	6	26	9	67	56	84	48	30	53	28	14	12	42	40	48	25	47	24	45	46	16	39	51	43	29	35	58	35	56	48	134	103	72	54	66	92
ARHGEF26	10	35	34	50	54	69	34	16	28	16	14	16	92	254	81	174	221	37	55	46	60	53	34	51	141	148	52	61	77	82	46	168	72	150	50	48
ARHGEF3	39	108	244	158	412	539	414	252	474	361	36	26	331	114	915	951	281	111	486	708	393	613	449	439	629	682	223	330	646	469	740	1575	307	911	342	479
ARHGEF33	12	12	9	4	13	22	16	3	11	12	11	11	17	8	19	28	10	16	13	17	11	16	7	27	21	28	14	7	13	11	13	39	12	13	13	20
ARHGEF35	2	2	5	13	3	2	5	8	7	3	5	3	8	32	13	3	6	1	4	8	11	14	5	15	14	11	7	10	8	4	14	11	7	8	12	7
ARHGEF37	8	7	153	38	31	26	53	10	26	30	9	10	31	10	41	71	37	14	28	28	72	185	19	29	21	116	17	19	43	19	42	71	25	75	56	42
ARHGEF38	2	2	1	4	1	1	2	4	4	2	1	1	2	0	2	3	1	1	5	1	0	6	1	3	2	1	1	1	5	2	3	2	1	1	0	1
ARHGEF4	5	5	12	11	13	9	9	8	13	12	6	8	3	10	9	3	5	6	8	8	2	7	13	6	14	8	23	21	9	4	12	15	3	6	8	15
ARHGEF40	41	44	31	161	146	128	86	63	107	67	45	19	76	58	76	123	118	36	134	112	140	71	103	75	152	86	54	68	105	62	109	148	138	112	61	113
ARHGEF5	3	1	32	15	21	40	15	9	12	5	11	1	30	164	6	14	21	5	22	10	21	47	21	22	41	14	28	12	14	5	23	44	31	29	10	7
ARHGEF6	135	328	950	610	759	781	957	516	1235	627	137	71	531	259	1059	1852	1611	337	1131	960	1373	2507	1142	1170	1162	1753	558	901	1623	849	1269	2423	3127	2238	1462	1956
ARHGEF7	86	390	199	507	435	340	358	210	371	351	155	61	248	148	246	389	263	291	455	442	437	473	336	309	409	453	318	229	373	359	325	401	250	506	297	320
ARHGEF9	40	106	101	380	295	301	220	191	307	163	80	29	152	41	336	263	226	113	246	220	428	325	274	295	338	337	371	248	327	191	588	688	364	356	357	411
ARID1A	126	303	620	730	597	633	357	223	541	389	145	42	345	502	481	566	1432	222	655	574	614	1609	696	522	1069	709	473	438	595	723	846	787	807	735	773	613
ARID1B	99	206	336	801	487	517	298	238	441	250	113	65	274	274	371	534	619	191	426	413	496	954	545	434	661	582	428	373	502	533	499	780	508	611	521	589
ARID2	135	331	721	380	638	587	361	226	486	275	300	51	416	472	505	837	912	313	687	616	612	1392	659	646	943	856	637	491	666	582	570	961	713	834	781	566
ARID3A	14	20	32	12	17	16	14	15	30	18	19	13	9	8	27	10	33	9	18	23	5	63	19	21	23	15	19	11	13	25	22	31	11	18	50	22
ARID3B	11	17	33	27	13	28	8	14	20	21	10	6	16	11	15	13	15	13	24	22	14	66	28	18	29	17	15	25	20	26	19	28	29	26	32	23
ARID3C	3	4	2	4	4	4	5	6	4	2	5	3	0	1	0	5	0	7	4	3	0	3	1	2	5	2	4	3	3	1	2	2	4	3	3	4
ARID4A	201	541	1037	711	639	1005	845	500	1192	678	325	84	674	494	1365	1863	697	564	1057	1158	1069	2415	1128	1015	1697	1486	980	895	1490	1066	1378	1762	1289	1525	1460	1305
ARID4B	151	376	588	1152	805	723	540	360	647	342	120	59	547	923	1104	1353	467	406	948	1003	519	1847	895	782	933	1190	950	789	1278	960	1189	1662	1127	1289	1017	1120
ARID5A	5	11	14	32	10	22	14	11	28	12	7	7	10	5	24	25	9	5	18	39	11	27	13	11	44	16	3	8	17	20	23	24	12	13	11	11
ARID5B	143	516	233	646	474	1357	622	472	1177	590	141	74	591	748	1131	1001	770	441	816	1047	913	734	907	672	1087	946	591	710	1444	872	909	1671	617	1419	877	847
ARIH1	77	275	495	372	517	867	461	426	760	433	93	48	583	1037	769	928	1249	326	902	907	1113	1194	1045	638	926	916	965	728	858	750	1245	1318	1351	951	839	912
ARIH2	28	78	202	230	209	233	143	95	205	124	42	11	170	204	260	178	191	70	195	199	253	299	223	177	268	228	211	197	216	347	215	336	242	285	202	233
ARL1	72	136	216	540	449	1100	426	428	1015	362	66	59	393	687	760	584	646	175	569	730	678	615	973	408	1301	508	1075	836	895	758	1384	1368	1218	607	851	1306
ARL10	2	13	5	44	11	34	12	19	36	20	4	2	26	12	28	22	31	7	26	27	23	20	28	20	40	25	20	10	19	24	51	26	35	31	34	34
ARL11	18	15	68	39	32	32	19	17	30	35	10	14	6	7	27	15	20	12	36	30	29	147	26	32	35	23	12	16	18	29	36	23	14	28	32	24
ARL13A	2	2	13	6	10	4	3	3	8	1	4	1	1	11	6	7	3	5	9	3	3	3	2	6	4	7	5	3	2	2	0	5	1	7	2	4
ARL13B	35	82	88	236	182	238	167	144	232	149	51	26	133	204	243	205	315	88	235	253	240	236	295	170	449	206	201	180	273	299	278	422	482	302	191	293
ARL14	3	2	3	2	1	4	3	2	3	2	0	1	1	1	3	2	2	1	1	5	0	3	0	0	4	1	1	2	3	0	1	0	1	5	2	2
ARL15	31	41	86	164	284	237	188	114	263	145	22	36	167	173	270	227	257	81	267	341	179	316	302	238	261	396	170	106	382	315	276	595	165	444	375	329
ARL16	4	4	9	25	12	17	12	18	12	7	1	2	5	25	19	6	5	1	15	6	42	30	20	12	28	15	16	20	18	24	26	24	43	18	13	43
ARL17A	2	4	4	1	11	7	6	1	4	2	8	1	2	7	6	12	3	3	7	5	4	6	10	11	8	2	7	1	9	8	4	8	5	12	7	11
ARL17B	0	0	0	0	1	1	0	0	0	0	0	0	0	0	0	0	0	1	0	0	0	0	0	1	1	0	0	0	1	0	0	0	0	2	2	2
ARL2	10	6	35	59	28	69	54	38	80	28	7	14	32	33	76	49	54	13	47	67	45	69	65	25	49	28	87	54	50	34	70	70	103	26	35	71
ARL2BP	81	133	337	326	317	917	359	372	727	328	80	51	255	509	447	338	592	176	441	545	629	463	649	228	967	324	2333	752	540	615	1241	877	572	393	495	946
ARL3	38	37	60	134	137	226	138	154	227	86	26	14	110	195	164	153	120	46	130	182	224	165	160	86	411	131	180	137	209	226	367	278	237	156	223	382
ARL4A	13	46	224	65	64	98	74	63	95	65	17	15	82	121	112	92	51	33	84	110	120	466	102	79	142	114	101	90	203	99	108	222	143	122	154	125
ARL4C	120	139	137	580	411	1072	368	335	1231	333	42	33	239	537	455	480	322	150	594	802	1172	489	1038	212	787	289	322	191	466	760	989	581	947	611	369	643
ARL4D	9	3	8	23	47	13	8	26	35	10	2	2	31	62	12	9	77	11	17	17	30	24	35	8	53	27	62	34	36	126	18	27	31	29	40	65
ARL5A	14	76	102	293	185	267	121	134	201	139	34	25	145	184	305	228	165	95	342	282	428	386	390	217	400	355	360	332	359	490	450	460	408	271	377	551
ARL5B	34	72	76	182	289	192	96	110	148	75	27	22	135	241	223	432	176	111	228	262	308	330	215	173	381	255	454	248	220	239	312	366	261	252	338	313
ARL5C	4	1	1	1	2	1	1	1	0	1	4	4	0	2	0	2	0	1	4	1	0	3	1	1	3	1	2	1	5	1	4	1	2	3	2	1
ARL6	8	4	13	35	13	25	22	10	27	12	2	3	20	22	28	19	47	17	24	26	39	30	28	15	83	20	24	24	37	25	23	44	15	27	18	31
ARL6IP1	92	162	1060	600	852	758	551	507	987	412	73	85	506	851	991	919	655	249	899	985	1165	2959	895	666	1791	885	944	829	1203	1022	1257	1844	2370	976	1156	1130
ARL6IP4	16	53	58	131	83	127	102	109	147	95	34	10	78	92	161	94	126	40	81	118	254	223	136	63	211	50	129	126	132	136	254	222	142	87	138	216
ARL6IP5	59	126	344	482	739	847	531	496	1099	431	72	64	478	425	1282	694	402	200	795	905	994	1121	986	626	1133	729	628	680	1149	819	1154	2001	1076	748	895	1256
ARL6IP6	14	22	80	82	74	76	61	59	99	65	15	18	54	189	74	118	66	36	104	89	242	254	105	53	368	91	125	106	86	172	120	113	139	121	108	120
ARL8A	15	14	25	47	19	55	20	12	44	21	8	5	32	41	29	22	31	9	43	35	20	78	34	18	44	29	32	24	55	41	68	46	52	32	38	39
ARL8B	30	86	251	339	235	347	194	200	304	166	40	7	242	483	601	376	827	175	549	674	866	950	577	343	1194	474	318	375	390	578	724	636	893	387	558	641
ARL9	0	3	6	17	5	8	1	5	3	0	0	0	2	2	2	2	28	0	3	3	3	21	2	2	3	1	9	11	1	21	2	3	10	2	4	5
ARMC1	29	40	116	308	205	164	85	98	152	95	24	11	116	326	192	157	319	49	166	180	251	339	226	113	336	156	262	255	211	218	272	282	443	215	188	231
ARMC10	10	19	58	162	40	98	52	63	87	38	9	5	44	63	95	85	73	27	60	87	82	123	97	55	161	87	130	98	92	106	99	156	142	109	68	119
ARMC2	15	22	35	26	47	38	27	20	21	19	13	5	37	17	22	55	22	31	41	45	17	34	44	27	27	45	17	21	28	37	22	43	28	44	35	39
ARMC3	0	2	9	5	4	2	3	8	5	6	1	1	2	2	4	19	10	4	7	3	2	6	4	0	4	3	8	4	5	3	5	2	1	6	1	2
ARMC4	13	24	7	13	86	7	10	16	22	17	17	4	14	2	22	10	68	20	25	17	13	16	11	58	63	50	101	64	53	15	13	126	20	52	26	43
ARMC5	10	19	28	66	50	35	29	17	32	24	14	9	23	20	29	21	18	18	32	33	25	43	34	17	30	27	19	39	21	18	44	23	26	33	32	33
ARMC6	4	7	19	30	20	12	6	10	10	12	2	10	11	18	4	7	24	14	21	19	8	37	30	10	13	7	18	14	12	24	20	27	17	10	9	13
ARMC7	8	9	11	28	20	17	22	10	23	20	2	2	6	12	9	12	7	4	10	16	27	23	23	7	37	13	28	15	10	15	20	26	27	18	18	28
ARMC8	56	158	523	236	243	248	200	134	281	134	36	21	210	220	258	303	211	139	307	326	315	902	296	253	344	422	298	273	325	350	316	398	275	486	465	308
ARMC9	12	23	7	48	43	88	19	23	26	17	17	3	16	20	11	15	29	11	47	43	37	15	45	46	35	22	49	13	26	17	48	30	63	30	21	34
ARMCX1	14	39	53	316	179	186	125	112	216	94	22	17	99	21	236	208	98	25	113	152	253	140	153	137	96	206	388	214	204	239	253	325	321	197	201	291
ARMCX2	16	49	38	185	90	295	81	122	234	63	20	7	88	22	153	114	128	51	158	179	389	109	372	96	58	190	52	112	169	210	259	279	277	130	277	283
ARMCX3	97	114	279	1633	739	1131	505	462	1045	432	60	73	516	519	609	726	477	185	592	805	813	757	959	449	737	668	1089	685	1151	916	1081	1394	1636	867	1044	1388
ARMCX4	23	135	39	66	197	96	62	56	37	37	30	16	103	19	90	124	47	67	119	104	68	44	143	170	76	278	103	44	71	116	73	155	73	287	68	85
ARMCX5	15	63	52	77	103	76	81	41	71	41	25	6	51	66	112	73	69	36	95	71	247	87	89	80	166	97	162	72	90	200	141	158	165	114	103	166
ARMCX6	6	22	34	90	84	64	43	37	95	31	11	5	36	46	33	34	38	27	60	50	59	65	63	33	45	19	108	98	47	59	76	75	69	50	75	56
ARMS2	3	1	1	0	0	0	2	2	2	1	0	1	1	2	1	3	0	2	1	2	0	0	2	0	1	1	4	0	3	1	2	3	0	2	4	0
ARNT	89	189	506	1009	370	758	398	326	731	283	62	54	392	415	534	722	917	122	673	581	384	1051	622	383	1439	622	602	578	790	939	600	1205	948	759	637	1010
ARNT2	13	16	17	17	24	123	11	16	23	24	9	8	19	25	12	24	57	10	56	71	31	49	44	17	19	9	27	41	12	16	74	32	26	13	18	16
ARNTL	13	11	54	29	64	71	20	18	61	25	20	7	54	32	111	50	49	13	77	44	42	95	49	41	65	94	33	53	111	69	97	157	59	70	42	86
ARNTL2	28	13	23	14	51	266	35	69	139	60	35	12	49	47	56	47	60	28	106	138	152	91	116	48	596	38	45	39	46	175	127	102	74	50	40	106
ARPC1A	14	27	94	241	113	139	101	67	168	60	13	7	91	104	128	92	122	35	121	125	133	169	136	56	205	80	133	122	138	153	155	108	225	136	88	139
ARPC1B	29	49	216	188	175	299	143	171	295	157	16	25	116	154	269	152	154	48	271	345	341	538	314	107	251	108	188	254	294	338	489	282	489	190	273	330
ARPC2	299	416	1892	3952	2099	3604	1923	2487	4555	1872	340	193	1220	2319	3367	1656	1922	539	2148	3077	4727	5144	3514	1544	2489	1499	2328	2081	2707	2884	3845	4163	3903	2220	3029	4116
ARPC3	39	29	250	124	163	292	124	191	343	106	23	8	113	157	259	94	85	33	179	239	214	406	205	106	471	66	163	202	157	287	283	233	240	137	249	248
ARPC4	56	92	286	479	262	479	213	286	537	217	52	28	146	238	312	172	404	100	297	461	476	836	453	168	639	180	285	270	334	363	547	501	510	256	388	535
ARPC4-TTLL3	45	134	194	221	208	260	129	140	239	119	41	27	116	134	160	144	259	115	219	281	262	444	261	171	333	190	166	134	182	206	272	249	263	273	229	295
ARPC5	135	144	942	1244	818	1361	689	690	1673	635	139	84	517	1049	848	613	1239	196	947	1283	873	2413	1044	472	1946	762	979	947	1244	1604	1453	1676	1623	957	1713	2338
ARPC5L	12	14	52	102	101	91	64	51	87	64	9	10	55	110	94	37	41	14	64	85	140	95	76	20	95	37	58	83	78	96	143	105	175	64	53	78
ARPM1	13	7	12	13	9	13	4	17	26	10	8	4	11	17	33	21	10	6	9	10	26	19	23	22	9	13	21	35	16	6	18	15	16	15	17	9
ARPP19	109	189	511	1204	781	1367	943	766	1427	781	85	67	788	1482	1441	1399	1240	346	996	1215	2373	1767	1306	784	1997	995	1233	1089	1577	1120	1690	2026	1867	1213	1202	1781
ARPP21	13	12	12	26	38	13	17	14	16	10	8	7	81	15	267	14	22	11	13	25	12	362	24	53	66	29	28	118	15	29	15	14	11	29	18	18
ARR3	2	4	1	3	3	1	1	2	1	1	3	0	8	2	3	3	1	0	6	3	2	8	6	8	4	4	1	1	2	1	2	3	3	2	1	2
ARRB1	40	69	89	102	121	104	131	96	189	104	31	5	55	25	97	102	91	51	125	170	79	115	98	92	100	91	71	63	204	85	122	184	133	134	96	126
ARRB2	63	37	585	260	181	415	183	156	692	202	46	30	73	79	187	222	156	61	387	525	337	987	345	121	438	251	122	193	276	347	427	280	266	268	442	245
ARRDC1	2	11	25	10	6	13	9	6	6	3	2	1	6	4	9	6	8	1	12	15	8	23	4	5	6	5	11	9	9	3	14	9	9	15	15	8
ARRDC2	5	34	121	72	61	83	68	33	62	54	16	17	48	26	70	80	42	18	44	59	36	159	31	50	101	109	32	71	70	44	64	79	76	109	47	37
ARRDC3	104	260	464	626	986	942	407	539	765	421	210	88	465	645	907	1246	1039	298	1148	1608	966	1263	1004	832	2515	1183	812	1162	1188	761	1586	1236	1258	983	900	1086
ARRDC4	45	59	91	153	287	179	156	136	302	165	31	36	127	239	353	353	184	83	294	465	302	213	377	204	619	220	210	285	278	572	473	368	434	325	190	551
ARRDC5	3	3	20	5	7	19	5	3	2	3	2	1	4	2	4	5	1	4	7	3	1	13	13	4	2	7	6	5	8	2	5	8	9	11	5	2
ARSA	14	10	35	36	36	48	25	21	23	17	9	13	35	26	21	14	18	11	21	31	14	36	39	16	27	32	18	19	16	18	25	26	8	41	34	23
ARSB	59	98	208	323	617	788	238	250	560	160	61	27	305	237	606	158	438	148	398	459	344	625	665	607	570	368	197	244	267	358	583	1081	537	338	346	426
ARSD	30	49	142	323	140	214	119	135	135	79	25	17	69	78	161	148	450	66	186	220	297	275	181	134	205	156	212	123	195	119	215	348	320	235	275	237
ARSE	0	6	6	7	2	28	2	4	5	5	2	2	3	2	5	3	12	1	4	7	25	3	12	7	14	6	20	3	4	4	10	5	40	7	5	11
ARSF	5	8	1	4	4	0	3	3	3	7	4	5	2	2	1	3	4	3	5	8	3	5	2	2	8	1	3	3	7	4	6	1	12	1	0	6
ARSG	3	14	29	25	15	31	30	17	14	21	7	4	21	18	17	13	54	7	36	30	19	52	15	20	15	37	14	21	27	11	18	30	37	16	25	15
ARSH	0	2	2	4	3	3	4	1	2	7	3	3	2	1	2	4	3	2	3	2	1	4	3	3	8	4	3	4	6	4	1	4	1	2	5	4
ARSI	5	9	5	14	8	18	12	17	15	11	11	6	8	3	9	5	24	10	5	11	16	16	20	7	16	11	20	8	11	12	43	10	19	13	13	6
ARSJ	23	53	30	113	56	225	42	69	219	54	23	11	55	196	56	47	101	38	90	141	314	52	167	39	126	38	84	30	28	109	118	67	143	79	56	81
ARSK	15	26	53	113	87	81	70	49	82	34	15	12	52	130	85	101	218	31	86	99	59	127	90	97	198	81	165	88	91	66	137	143	127	166	87	99
ART1	3	1	2	2	3	2	1	3	3	1	1	1	1	0	0	2	3	2	3	1	1	4	1	3	2	3	2	1	3	2	0	0	1	5	1	3
ART3	5	3	2	21	6	6	2	2	7	5	2	3	20	2	16	25	12	4	4	5	2	2	0	4	8	8	6	21	7	2	15	8	2	8	3	6
ART4	3	5	229	6	9	4	4	5	7	7	3	1	2	4	8	9	4	3	6	4	6	297	12	8	4	54	6	4	12	4	1	5	2	11	35	8
ART5	4	2	1	5	4	0	3	4	3	4	2	2	3	3	6	8	3	3	3	4	4	1	0	3	5	0	6	8	4	4	4	4	1	1	3	5
ARTN	18	5	7	14	10	7	5	13	7	9	8	23	11	7	10	1	6	4	9	0	7	10	4	3	23	8	21	7	10	17	16	4	1	5	9	10
ARV1	20	53	220	150	135	242	129	129	206	92	31	21	95	304	216	137	114	59	180	205	181	355	238	113	207	217	260	187	267	209	400	310	298	182	231	305
ARVCF	11	16	35	31	20	17	32	13	37	25	9	6	12	12	15	23	20	10	33	27	4	52	16	20	29	65	22	19	50	38	29	86	11	72	24	52
ARX	6	3	4	11	7	5	8	9	6	7	5	8	4	1	6	6	6	4	4	5	6	9	5	6	4	5	18	12	4	9	12	8	6	6	4	10
AS3MT	5	22	10	14	10	17	20	22	12	10	7	6	16	18	63	42	65	12	17	14	9	29	8	19	31	23	21	30	56	57	38	99	57	33	26	65
ASAH1	122	126	536	573	1009	1222	670	523	2324	585	77	75	327	239	1051	755	765	172	1139	1992	802	1281	1706	632	1476	672	615	714	1113	1226	1504	1735	1588	955	842	1030
ASAH2	2	3	3	5	3	1	1	7	1	2	1	1	4	3	2	0	3	1	0	1	4	5	0	3	3	1	1	2	0	3	0	0	0	4	5	4
ASAH2B	0	0	0	0	0	0	0	0	0	0	0	0	0	0	0	0	0	0	0	0	3	0	0	0	0	0	0	0	0	0	0	0	0	0	0	0
ASAM	22	88	51	544	392	472	108	193	204	95	27	14	118	25	311	193	633	79	191	218	278	200	406	290	940	239	482	318	262	214	444	776	435	246	268	523
ASAP1	236	934	1820	2354	2071	2238	1268	1018	2131	1159	389	127	1306	3848	1552	1194	5302	823	2290	2544	1653	3611	2560	1576	2004	2025	1441	1322	1723	2115	1816	2180	2745	1967	2420	2295
ASAP1-IT	5	35	53	11	43	16	17	2	7	8	3	2	28	37	7	23	8	21	33	23	2	29	12	25	15	37	6	12	15	23	12	12	17	42	20	8
ASAP2	42	155	96	161	171	205	302	118	286	209	44	17	182	258	210	351	139	117	293	356	306	185	245	139	347	286	138	148	347	297	309	384	226	339	171	356
ASAP3	31	29	23	78	80	64	32	34	44	36	22	4	44	18	100	40	90	35	73	52	49	33	107	42	82	54	57	48	36	76	67	49	110	38	40	69
ASB1	26	76	151	262	129	134	88	89	129	53	22	25	70	112	98	138	59	37	104	108	115	187	95	81	68	96	100	142	130	127	205	254	113	141	115	210
ASB10	6	4	1	2	4	5	4	3	3	3	1	3	5	2	1	5	2	5	4	3	1	3	5	3	2	2	2	1	4	5	5	9	4	3	3	3
ASB11	5	2	5	0	1	8	1	4	2	4	2	2	4	1	5	2	0	1	4	3	0	6	1	3	3	2	4	7	3	1	4	2	4	6	2	3
ASB12	2	1	4	1	0	2	3	2	0	1	2	0	14	0	3	1	0	1	2	3	0	1	2	2	1	2	0	3	2	2	2	1	0	2	1	1
ASB13	8	6	26	44	24	45	19	11	46	24	11	5	19	36	45	42	55	17	39	41	37	87	56	40	55	45	41	22	56	27	32	75	81	45	45	80
ASB14	5	26	51	43	43	59	44	21	51	41	9	10	81	45	51	57	25	27	75	65	35	83	67	65	59	103	63	35	69	60	57	91	60	89	56	73
ASB15	2	12	7	7	6	8	5	9	3	5	16	5	35	3	33	11	9	4	4	4	3	6	9	1	6	9	9	21	2	10	7	11	3	4	4	7
ASB16	1	3	4	5	7	4	6	5	3	6	2	1	15	7	4	2	3	3	3	4	4	17	5	1	7	10	4	5	8	7	1	12	5	11	6	7
ASB17	3	0	1	3	0	3	3	2	2	2	2	2	2	1	0	2	4	0	1	1	0	6	2	1	4	0	3	2	0	1	3	4	4	2	1	2
ASB18	0	1	2	3	0	4	2	3	2	1	2	0	0	0	1	2	1	2	2	2	4	0	2	2	1	2	3	3	1	3	2	3	2	1	3	2
ASB2	3	3	6	5	5	3	6	5	9	5	1	1	10	5	9	9	5	3	7	3	2	7	6	1	4	4	7	12	5	5	6	7	18	5	2	6
ASB3	19	60	76	105	200	106	66	57	87	43	28	9	63	76	122	138	90	53	110	110	96	176	103	105	235	219	105	133	142	148	83	184	138	155	123	158
ASB4	3	2	0	1	7	0	2	8	3	4	1	2	9	2	14	3	4	1	5	8	2	2	3	1	8	3	3	7	3	2	1	5	1	4	4	4
ASB5	9	6	5	40	16	8	2	9	11	11	10	4	407	11	561	38	18	11	20	24	8	20	16	12	50	5	8	172	11	17	14	15	20	6	2	5
ASB6	18	19	61	71	64	59	62	42	80	48	17	11	28	55	60	47	132	21	46	66	73	110	76	49	74	41	62	68	48	59	65	97	144	78	53	84
ASB7	32	53	194	193	119	169	147	88	206	98	41	11	94	108	199	195	252	57	182	245	237	366	197	133	292	185	139	166	219	168	224	316	235	237	174	219
ASB8	9	42	139	155	115	173	115	70	243	121	23	11	161	144	403	246	201	62	174	190	215	482	247	112	334	179	213	252	275	212	404	340	236	168	197	217
ASB9	0	3	10	8	6	7	5	13	11	4	1	5	13	5	18	16	1	5	22	13	8	19	10	8	8	11	8	5	15	9	10	18	9	20	5	14
ASB9P1	0	6	37	0	6	12	4	3	2	1	3	3	10	4	7	11	7	4	10	7	1	10	12	3	12	20	21	9	9	5	6	2	6	22	5	3
ASCC1	24	64	67	106	230	225	133	121	271	95	40	15	97	218	227	224	119	47	153	213	181	169	180	143	293	177	204	196	258	176	228	364	267	242	231	250
ASCC2	24	53	207	182	123	135	96	75	111	91	70	15	63	80	121	97	181	39	142	144	114	485	143	82	335	138	165	105	187	153	203	165	257	146	155	144
ASCC3	183	455	616	754	815	1309	563	536	1127	425	277	49	723	1482	667	660	844	566	1268	1222	1302	1092	1728	861	1546	1127	1041	826	976	2606	1777	1191	1184	962	1077	1290
ASCL1	7	4	6	11	14	9	4	10	7	8	6	8	10	9	6	8	7	7	12	7	4	11	11	7	15	16	7	6	4	9	14	38	10	13	9	11
ASCL2	4	4	3	3	1	3	3	4	1	7	4	4	2	0	3	2	7	7	7	3	2	2	2	2	12	5	4	5	2	4	6	8	4	5	4	8
ASCL3	2	0	2	0	1	2	0	1	0	2	0	0	1	0	0	1	2	1	2	1	1	1	1	3	2	2	1	0	0	3	0	0	1	4	2	3
ASCL4	5	1	8	6	2	7	4	4	1	3	2	1	4	2	4	4	6	7	5	6	4	7	6	6	5	5	5	5	9	3	11	5	4	8	4	2
ASF1A	48	72	424	269	276	311	328	272	584	225	31	29	249	1221	478	409	188	108	333	456	1087	1326	542	289	654	441	331	482	534	576	596	691	377	354	598	777
ASF1B	8	2	52	14	14	11	4	12	18	6	4	1	9	28	17	3	30	4	23	14	20	130	10	8	34	16	14	22	14	27	27	5	39	18	24	11
ASGR1	1	3	8	5	4	6	6	5	6	7	2	2	7	1	4	6	4	4	7	22	2	11	5	4	7	5	8	5	4	5	7	5	0	9	6	5
ASGR2	1	2	14	4	9	7	4	5	12	2	1	3	4	2	8	7	2	3	3	6	5	6	16	3	5	11	3	2	6	4	14	19	8	13	7	15
ASH1L	439	1104	1843	2030	2003	2266	1659	800	1584	1004	579	163	1344	1995	2205	3593	3891	889	2147	2040	2830	2736	2078	2097	3456	3212	1950	1754	2710	2419	2273	3845	3292	3461	2103	2559
ASH2L	29	82	468	294	198	363	195	188	382	180	26	24	153	572	260	279	435	72	286	286	367	894	345	165	613	277	422	293	269	376	396	473	290	283	441	405
ASIP	2	2	1	3	1	0	1	2	0	0	3	0	0	1	0	0	1	0	1	0	1	4	0	0	1	1	1	0	0	1	1	0	1	1	0	0
ASL	2	11	17	26	23	43	25	17	24	15	8	5	17	21	26	18	23	9	24	36	11	48	23	15	49	18	20	20	24	31	38	39	43	37	33	25
ASMT	0	1	0	0	1	2	0	0	0	0	0	0	0	0	0	0	0	0	0	0	0	0	0	0	0	0	0	1	0	0	0	0	0	0	0	0
ASMTL	0	0	0	0	0	0	0	0	0	1	0	0	0	2	0	0	0	0	0	0	0	0	0	0	0	0	2	0	2	0	0	0	0	0	2	0
ASMTL-AS	0	0	0	0	0	2	0	0	0	0	0	0	0	0	0	0	0	0	0	0	0	0	0	1	0	2	0	0	1	0	0	0	0	0	0	0
ASMTL-AS1	0	0	0	0	0	0	0	0	0	0	0	0	0	0	0	0	0	0	0	0	0	0	1	0	0	0	0	0	0	0	0	0	0	0	0	0
ASNA1	14	17	44	113	50	94	28	30	77	38	2	10	37	57	88	41	185	20	78	70	78	151	69	27	84	26	150	122	68	95	98	103	264	62	73	73
ASNS	20	50	169	209	67	127	44	50	87	41	34	11	124	249	64	70	59	27	93	58	180	83	152	57	262	176	276	291	55	383	85	116	144	138	107	129
ASNSD1	32	46	180	202	171	286	213	176	361	180	38	17	143	244	372	246	187	47	197	231	379	480	313	169	718	229	382	353	297	309	409	417	394	258	299	553
ASPA	4	7	8	13	18	8	24	3	7	16	6	3	21	1	18	61	40	6	33	33	13	34	33	24	5	39	23	53	42	2	12	25	29	55	29	23
ASPDH	1	1	5	2	0	3	5	2	2	5	2	1	1	3	5	3	4	4	2	7	3	1	1	4	4	2	2	1	3	4	0	7	4	3	3	3
ASPG	1	0	0	3	3	1	1	4	2	0	3	1	1	1	1	1	2	3	2	1	1	1	2	2	1	2	4	2	0	0	1	2	1	0	1	0
ASPH	423	1226	929	6259	4337	4903	2781	2343	5824	2121	798	241	6698	53970	5023	5825	7430	1720	4676	5543	5157	3442	6671	3697	7974	4000	3546	3338	5183	5758	5149	6971	7656	5040	3491	4703
ASPHD1	5	4	5	31	3	5	11	10	6	5	5	3	3	2	5	2	6	2	6	3	4	2	4	5	5	4	19	4	2	2	13	5	7	7	2	5
ASPHD2	6	4	13	13	10	21	12	4	21	14	5	7	9	13	20	11	19	6	16	24	26	36	20	5	20	15	26	19	15	15	20	24	38	23	25	18
ASPM	167	129	1845	1150	757	311	134	309	337	157	371	66	432	1938	285	110	1181	204	535	318	1115	3403	452	353	1918	792	1059	585	264	671	437	210	1966	409	1160	448
ASPN	197	228	228	534	1038	5793	623	2671	3781	356	113	94	984	178	1179	291	1279	310	2192	2109	1346	10685	5471	658	99	526	2133	2183	1356	1347	1056	128	1122	200	2306	5830
ASPRV1	6	5	11	16	4	4	12	11	9	5	1	7	5	7	11	12	4	2	2	3	4	14	3	11	7	9	11	16	7	6	15	12	6	9	3	14
ASPSCR1	2	2	6	20	8	6	8	4	12	9	4	3	6	8	8	8	4	5	12	9	6	12	14	5	73	5	18	16	11	17	8	10	18	8	12	6
ASRGL1	7	13	78	26	23	39	39	11	45	48	5	7	11	12	30	16	25	5	39	39	26	126	21	12	56	15	18	22	37	29	51	28	14	22	34	22
ASS1	4	20	11	137	9	36	28	41	54	28	12	4	42	50	73	79	99	8	31	50	85	37	35	18	47	28	183	174	69	54	75	76	96	53	81	101
ASTE1	17	53	106	102	114	129	73	57	79	54	16	6	46	110	78	115	88	40	70	118	125	165	99	102	190	97	147	86	110	149	80	171	109	122	98	127
ASTL	1	2	2	0	3	2	3	1	1	4	1	1	1	0	0	0	2	1	1	2	1	1	4	2	3	0	1	2	2	1	3	2	0	0	0	3
ASTN1	8	6	11	15	15	13	20	12	13	15	6	10	7	5	12	10	11	2	7	10	4	16	7	7	13	5	14	8	16	10	15	11	4	11	7	10
ASTN2	48	47	51	79	77	47	43	26	24	33	63	19	54	42	52	54	24	42	72	46	23	37	53	73	58	74	44	29	47	67	51	73	51	81	25	39
ASXL1	92	221	250	479	568	415	235	210	295	175	167	37	211	243	257	385	461	157	325	308	274	630	354	253	500	357	306	210	340	317	357	496	497	437	303	342
ASXL2	108	292	675	699	840	796	478	310	678	387	143	51	416	490	599	739	869	224	715	728	632	1478	783	526	1052	666	550	436	661	584	775	1108	1095	815	769	598
ASXL3	11	9	16	11	19	17	11	15	14	17	20	9	18	7	24	34	14	10	16	23	11	25	13	34	37	12	15	14	25	25	17	60	8	28	21	13
ASZ1	6	7	7	4	9	5	5	6	6	9	9	6	3	6	5	3	7	5	3	5	4	6	7	3	12	4	11	7	4	6	2	4	8	8	7	10
ATAD1	37	88	139	200	213	298	169	95	257	139	40	17	175	338	359	362	274	113	318	318	447	560	322	313	655	347	405	262	428	353	440	668	466	401	397	435
ATAD2	75	113	1192	612	638	258	195	199	340	175	209	44	353	1591	455	298	1059	208	394	323	619	1931	373	322	1278	621	1709	478	388	1086	379	602	995	458	865	447
ATAD2B	110	368	659	341	523	335	258	208	295	212	201	45	374	249	341	526	343	297	561	475	372	966	452	470	491	736	444	380	430	488	600	596	704	698	417	464
ATAD3A	2	6	4	15	9	7	8	12	12	6	4	3	7	7	6	3	16	1	6	4	21	6	8	4	40	2	15	13	5	15	10	7	16	7	6	4
ATAD3B	4	2	6	1	7	2	4	1	0	3	1	5	10	0	5	6	2	2	3	5	1	5	1	4	17	1	1	2	0	5	1	5	6	8	2	2
ATAD3C	4	6	5	3	6	4	10	4	3	5	4	5	4	5	7	8	8	10	4	8	6	6	6	6	12	6	5	5	4	2	8	9	1	9	5	2
ATAD5	53	53	505	194	186	109	85	71	113	65	121	13	114	194	103	112	157	54	201	131	264	621	134	167	275	326	186	147	127	192	102	120	193	177	259	115
ATAT1	27	48	46	65	104	68	18	33	42	31	16	7	41	105	50	22	31	26	56	55	44	40	97	55	57	52	46	14	41	79	50	64	34	76	48	55
ATCAY	13	2	7	8	16	9	8	11	9	12	6	6	5	8	6	4	8	5	5	8	5	12	4	6	5	5	6	10	6	8	11	11	11	9	7	8
ATE1	20	91	140	102	142	188	112	51	194	91	29	9	108	157	139	134	77	72	208	174	111	203	110	118	138	160	127	98	196	111	280	234	144	171	136	189
ATF1	21	33	152	189	149	207	118	72	238	130	29	10	103	166	237	256	167	48	181	128	218	481	182	112	334	224	236	263	235	207	351	424	264	252	253	351
ATF2	90	226	343	469	416	546	303	228	466	276	110	32	232	346	313	429	460	236	438	425	409	660	533	336	778	429	584	433	472	665	728	776	552	455	395	686
ATF3	28	25	21	34	140	108	44	86	133	37	17	17	89	164	311	458	54	25	122	271	27	46	35	33	123	50	13	29	13	48	24	22	44	41	188	150
ATF4	119	287	397	515	570	706	419	422	796	426	88	41	321	585	687	397	336	286	489	497	602	838	546	337	1242	457	776	648	601	683	697	725	652	381	712	998
ATF5	12	17	32	164	49	48	41	47	72	42	13	5	35	51	34	32	76	16	56	69	62	58	76	23	109	27	77	50	51	73	188	78	133	44	66	65
ATF6	108	183	379	687	465	529	361	246	690	231	98	32	278	495	526	398	984	197	621	553	580	651	702	330	930	484	618	346	539	502	786	878	1108	516	603	516
ATF6B	30	65	114	129	141	132	79	68	117	76	33	11	77	125	127	108	150	54	135	163	228	224	225	120	145	106	154	92	104	135	176	156	110	116	98	102
ATF7	133	459	749	970	1118	1229	826	646	1155	550	137	88	624	738	895	1424	1872	412	1180	1126	1365	1553	1580	1152	1725	1595	1070	872	1251	784	1561	2024	1627	1629	1205	1655
ATF7IP	161	455	1103	704	1118	1528	955	599	1216	696	216	75	708	650	1021	1600	1511	546	1316	1299	1816	2393	1382	1014	1231	1461	1404	1181	1486	1023	1757	2144	1304	1610	1317	1372
ATF7IP2	35	77	60	63	97	104	90	49	85	54	37	13	80	60	87	141	70	59	117	86	85	187	131	102	155	208	79	68	118	123	143	210	138	147	104	116
ATG10	1	19	23	55	44	54	30	29	39	17	4	5	13	29	56	35	34	21	55	53	55	56	47	24	91	50	38	53	54	45	54	61	57	49	48	86
ATG12	36	61	152	264	220	299	148	140	267	126	21	17	118	267	240	199	164	116	268	252	524	340	334	147	362	255	278	282	247	243	312	284	528	229	257	432
ATG13	48	94	233	265	217	279	190	126	222	155	51	29	104	198	186	220	255	94	220	225	257	423	287	140	275	216	200	218	240	225	270	355	304	252	213	278
ATG14	17	79	294	207	124	167	91	73	117	86	20	26	164	135	167	182	142	70	178	158	171	328	146	130	369	251	180	182	169	223	123	219	203	222	161	125
ATG16L1	40	43	83	163	100	90	47	46	82	58	40	13	60	75	56	62	35	22	67	80	63	91	51	60	72	124	44	83	87	106	63	85	96	101	53	78
ATG16L2	12	21	119	13	60	31	23	10	30	22	9	3	27	10	35	32	8	4	32	50	13	119	23	38	16	68	16	3	34	16	13	28	16	69	46	20
ATG2A	4	21	32	24	24	35	23	27	22	17	11	10	11	19	29	22	11	14	32	38	23	63	30	27	35	41	30	24	28	21	23	30	25	16	44	18
ATG2B	90	313	892	684	1042	608	403	314	542	276	179	63	452	333	594	851	565	274	722	613	646	1011	719	712	1035	1004	690	481	657	628	517	919	966	1042	661	541
ATG3	65	105	746	264	650	799	454	547	1246	521	65	50	294	803	960	607	446	115	574	840	919	1622	696	350	1560	445	454	503	944	1082	1044	1145	913	671	1082	1129
ATG4A	16	32	288	88	85	142	59	64	154	62	16	12	57	52	110	79	46	27	91	158	210	302	113	66	104	104	95	135	84	106	135	106	124	106	149	143
ATG4B	11	29	60	56	36	45	37	18	40	19	6	6	13	33	27	39	25	21	39	41	17	71	30	23	28	48	26	31	29	16	33	58	41	74	15	55
ATG4C	21	38	55	49	89	93	53	36	101	49	13	6	36	37	91	78	97	29	110	108	130	98	81	71	151	68	83	69	97	106	123	97	135	87	95	119
ATG4D	7	7	91	43	23	23	13	16	20	16	2	5	21	27	16	13	42	11	20	33	19	119	22	16	49	30	56	53	19	31	14	32	46	17	34	21
ATG5	31	74	128	107	237	304	211	170	316	193	44	37	206	255	320	275	145	95	301	365	446	355	342	241	377	286	235	281	335	355	420	460	369	295	275	408
ATG7	118	149	355	456	328	584	195	174	386	190	114	29	169	291	297	262	342	129	379	403	379	441	401	208	838	346	300	212	275	384	593	392	431	434	354	439
ATG9A	30	47	201	291	169	236	91	121	185	97	34	15	131	326	188	124	394	53	199	238	221	388	275	116	158	156	258	224	151	133	177	260	190	153	229	176
ATG9B	10	13	8	31	7	27	19	21	13	18	12	10	13	3	34	11	33	9	14	27	10	20	19	19	25	19	28	11	11	21	20	21	19	29	11	23
ATHL1	10	43	49	40	187	69	28	12	40	26	10	6	63	40	33	46	6	9	23	40	18	26	30	27	15	61	16	14	42	34	58	54	15	78	28	16
ATIC	48	66	111	631	230	333	141	145	358	139	38	24	155	578	274	201	464	61	226	236	196	359	321	135	247	170	515	324	263	331	296	438	674	265	263	212
ATL1	7	21	53	65	64	216	73	69	127	71	8	8	76	114	143	139	118	19	56	120	68	89	150	72	126	80	92	74	123	83	125	151	149	99	88	104
ATL2	40	62	288	206	232	192	142	91	293	129	49	18	276	403	377	461	287	99	242	285	267	495	236	253	530	370	376	258	288	292	383	575	396	364	303	336
ATL3	38	99	185	303	198	481	226	222	456	190	34	19	194	274	368	246	1212	92	308	407	438	417	422	225	557	264	352	343	460	258	395	696	670	385	414	511
ATM	223	603	1159	1233	1362	1630	939	640	1400	825	308	136	1078	1339	1192	1866	1742	751	2029	2047	1180	2829	2098	1428	2373	2309	1941	1366	1757	1569	2588	2653	2647	2458	1719	1619
ATMIN	75	107	238	485	321	568	388	385	632	384	68	15	250	431	619	512	470	165	533	588	1224	751	844	438	879	358	402	518	629	553	653	888	568	488	562	908
ATN1	71	187	71	235	256	417	235	135	296	174	123	33	229	250	315	389	334	164	342	292	231	308	401	271	806	434	644	279	307	286	555	540	338	411	316	458
ATOH1	2	0	0	3	1	1	0	2	1	1	0	1	0	2	1	2	4	1	0	1	0	1	0	2	3	0	3	1	2	3	1	3	2	2	1	1
ATOH7	1	1	2	2	6	3	4	6	2	5	2	3	2	2	2	4	3	0	6	7	1	2	3	1	6	3	7	6	3	8	5	6	6	3	2	4
ATOH8	14	23	16	30	20	13	38	34	29	19	15	22	34	9	18	67	54	29	31	21	7	34	23	22	38	87	40	37	41	26	32	54	10	58	22	28
ATOX1	11	30	52	162	134	194	90	127	218	66	14	14	56	64	173	66	154	38	120	141	149	157	152	46	190	51	138	150	122	145	213	156	236	70	129	234
ATP10A	25	67	11	30	19	160	30	40	95	24	5	10	37	13	52	76	21	35	107	90	263	47	116	48	61	88	52	42	30	35	112	89	105	84	42	64
ATP10B	11	14	10	11	17	21	12	15	5	19	11	12	18	23	17	13	9	5	13	13	10	7	9	15	14	11	11	14	12	18	14	8	11	13	12	18
ATP10D	70	138	183	586	544	593	299	235	499	197	62	39	269	405	316	361	925	150	504	517	652	488	760	315	675	490	636	431	359	413	673	545	822	562	397	431
ATP11A	47	142	370	309	240	353	240	192	359	215	60	18	171	126	261	194	373	129	370	404	303	625	401	270	626	367	303	196	346	356	277	424	278	465	405	288
ATP11B	92	190	895	518	602	1025	459	344	602	390	93	56	659	3158	705	940	971	332	815	798	1311	2350	968	780	1203	946	1235	795	954	703	811	1150	1185	968	1151	863
ATP11C	57	179	206	346	415	383	278	229	452	219	241	28	318	362	405	425	499	142	505	586	454	538	605	328	364	445	810	394	505	550	473	547	503	508	427	456
ATP12A	8	1	4	4	9	6	4	7	5	10	5	2	2	2	8	2	6	4	3	4	5	5	6	2	4	2	6	6	1	6	3	8	5	3	3	7
ATP13A1	22	37	33	123	73	92	39	32	53	44	35	8	33	127	57	49	154	25	77	86	53	78	126	59	105	75	82	38	41	86	81	106	82	63	65	55
ATP13A2	15	13	24	29	31	33	36	17	45	22	8	7	35	43	26	20	54	15	39	37	60	60	48	17	73	29	50	25	40	35	82	67	38	56	16	36
ATP13A3	93	268	529	1084	729	1086	496	370	1034	440	120	57	857	2543	1150	1085	1392	431	1353	1526	1685	1696	1443	836	3233	1049	2201	1060	1035	1367	974	1497	2508	1199	1219	1223
ATP13A4	6	4	19	8	5	5	6	4	7	3	8	5	3	9	2	6	10	7	14	3	4	14	3	7	12	11	11	3	5	7	23	8	4	10	6	4
ATP13A5	3	4	6	4	4	11	1	5	3	7	5	1	7	3	4	2	6	2	1	11	2	5	0	0	5	5	3	1	3	4	3	9	1	4	4	2
ATP1A1	208	433	953	2315	1994	2309	1216	1134	2923	930	186	98	1282	2487	2326	1575	8841	530	1782	2300	2144	2485	2839	1343	4795	1468	3044	1531	1729	2617	2745	3865	4402	2106	2372	1659
ATP1A1OS	21	64	123	321	290	291	148	172	396	121	29	16	187	351	294	246	1309	74	216	327	336	400	412	194	693	238	344	207	222	295	422	566	615	311	362	226
ATP1A2	11	36	17	60	24	10	60	9	30	40	7	9	227	5	587	179	17	34	32	58	19	72	29	93	14	76	8	214	273	10	10	253	8	105	98	36
ATP1A3	4	4	9	3	4	6	9	5	7	5	2	8	2	3	2	7	29	3	6	8	9	12	4	4	4	3	16	7	7	8	10	10	4	4	8	2
ATP1A4	4	1	5	13	6	7	8	3	4	3	3	7	5	6	3	4	6	1	8	5	2	9	3	3	2	5	6	3	4	3	7	12	8	9	3	5
ATP1B1	59	88	80	161	456	745	141	211	526	136	32	21	300	293	582	283	395	95	375	383	472	239	463	314	665	268	680	450	420	682	585	919	540	328	348	537
ATP1B2	15	34	279	29	31	60	89	30	66	50	15	8	46	9	60	101	46	28	42	71	24	448	59	50	19	156	9	41	92	26	123	162	9	129	111	46
ATP1B3	62	128	268	299	712	530	315	298	1175	484	65	32	377	706	447	387	540	133	381	552	519	480	573	264	965	328	657	462	501	1111	597	784	666	447	547	388
ATP1B4	8	6	15	10	11	6	12	12	2	11	15	9	70	5	22	14	8	9	12	11	12	19	10	9	13	7	7	43	19	9	15	9	9	10	14	13
ATP2A1	6	5	8	47	25	13	5	5	11	13	8	1	225	7	73	75	24	6	14	5	8	13	10	4	14	8	6	407	19	22	4	11	11	8	7	7
ATP2A2	205	442	897	2125	1655	2938	1003	845	2207	791	193	108	2417	4244	2170	1750	3142	528	1953	2596	1829	1612	3095	1071	4029	1360	2146	1461	1482	1850	2301	2481	3466	2050	1551	1519
ATP2A3	6	11	215	27	39	53	22	16	35	24	6	16	39	11	36	38	56	23	28	39	9	506	27	35	3	71	16	34	65	27	19	46	6	63	102	18
ATP2B1	89	357	409	588	916	733	458	540	1083	411	181	59	566	891	824	1181	1049	372	1156	1210	833	916	1437	1021	1760	1113	1003	890	981	1256	1826	2211	2176	1381	1205	1973
ATP2B2	19	11	24	17	18	26	22	32	20	15	12	9	43	8	14	16	71	11	16	25	21	27	30	21	16	17	15	21	19	14	16	32	18	30	11	16
ATP2B3	10	10	12	11	13	9	14	15	10	12	11	8	8	7	11	5	13	15	13	11	12	11	11	5	12	11	11	16	10	15	23	15	18	13	7	11
ATP2B4	165	466	952	1388	1213	1550	1362	777	1545	887	146	104	762	684	1476	1707	3053	402	1367	1683	938	2006	1832	1491	1611	1475	1148	789	1823	779	1468	3219	1805	1720	1470	955
ATP2C1	101	197	519	462	792	805	388	382	690	284	100	57	522	1200	646	528	784	216	604	907	840	996	754	555	1464	677	1120	613	790	1056	719	1086	803	782	790	853
ATP2C2	2	1	14	4	3	8	5	3	5	5	1	0	3	2	6	0	13	3	5	8	2	22	1	3	6	16	6	5	6	4	4	5	2	6	21	3
ATP4A	4	1	4	4	6	6	6	3	4	4	6	4	3	4	1	4	3	2	3	6	3	3	2	3	0	8	5	1	4	2	3	3	3	9	1	2
ATP4B	0	0	5	1	2	4	3	2	5	2	1	4	0	1	2	4	1	2	2	4	3	3	0	1	2	5	2	0	2	4	8	6	1	3	1	2
ATP5A1	74	151	689	999	1093	929	588	741	1171	481	77	53	695	1107	1481	729	675	187	910	996	1171	1925	1265	706	1145	632	1592	1547	1286	1698	1415	1664	1934	863	1187	1365
ATP5B	182	259	1208	2023	2023	1883	1279	1556	2428	917	189	120	1100	2308	3271	1635	2708	360	1505	2031	2656	3640	2431	1541	3649	1393	2846	2138	2199	2029	3456	3458	5169	1862	2569	2542
ATP5C1	40	62	200	273	482	466	337	368	602	300	35	25	252	324	846	312	287	102	418	412	772	745	418	243	695	294	531	400	478	427	632	666	668	324	513	800
ATP5D	5	19	18	25	18	38	23	19	39	19	4	2	20	43	29	19	28	7	19	37	38	62	30	10	45	13	34	34	23	27	39	58	61	16	36	55
ATP5E	77	47	239	391	320	472	233	285	430	210	21	32	133	191	372	165	128	92	265	332	556	541	274	132	326	150	378	358	264	372	498	330	328	161	281	601
ATP5EP2	9	17	28	50	56	70	35	41	85	35	6	6	15	21	35	22	14	12	37	32	114	76	42	8	53	13	51	66	53	57	80	65	54	26	80	95
ATP5F1	55	65	272	421	454	448	309	353	587	276	45	43	228	408	637	337	527	110	348	485	770	783	529	215	871	220	430	490	400	562	705	645	910	315	438	687
ATP5G1	9	27	60	118	69	103	26	107	122	41	8	5	38	127	128	34	70	25	65	67	138	158	133	44	191	37	91	75	76	114	125	142	115	60	115	163
ATP5G2	21	24	58	142	100	122	64	77	100	52	15	7	62	99	85	49	73	32	79	95	86	165	66	33	112	80	121	162	81	76	119	112	117	64	97	125
ATP5G3	83	85	454	746	682	736	468	816	946	431	89	33	398	1146	1118	571	522	146	540	685	1010	1035	851	396	1354	390	487	728	815	1041	1142	1131	1837	563	786	1139
ATP5H	21	49	152	271	228	234	218	200	389	95	22	14	175	232	424	174	195	48	179	254	510	451	247	136	525	136	360	429	332	350	510	472	721	233	288	679
ATP5I	32	64	122	238	198	261	183	237	285	123	33	27	132	187	316	106	126	87	158	177	305	244	180	70	354	117	348	377	169	393	329	269	221	128	206	505
ATP5J	81	71	275	497	398	598	459	549	728	309	60	26	356	438	814	379	579	86	349	493	1114	860	583	296	1233	260	847	842	748	1033	1059	990	1982	507	731	1339
ATP5J2	20	27	146	247	175	228	141	153	367	136	36	5	104	169	292	80	190	54	146	208	271	328	213	80	539	83	196	232	175	348	471	273	489	154	216	337
ATP5J2-PTCD1	19	31	120	247	171	198	118	140	265	101	37	15	79	115	200	109	158	34	109	180	189	223	175	75	361	73	192	189	151	272	368	215	370	137	164	250
ATP5L	60	99	334	514	452	562	383	569	715	304	60	41	264	444	768	292	220	128	372	430	768	1040	454	261	1006	266	797	879	496	740	949	803	1038	320	647	1177
ATP5L2	0	2	5	8	7	4	6	6	10	1	1	1	2	4	3	1	3	5	4	3	9	5	7	3	5	2	7	6	2	5	11	5	12	6	4	11
ATP5O	57	92	236	436	348	423	297	507	553	262	55	37	210	279	642	250	380	72	281	362	690	606	428	215	798	184	773	758	508	517	681	617	1089	351	445	967
ATP5S	8	21	72	115	28	44	36	34	55	54	15	4	39	61	63	62	42	12	41	42	53	112	34	49	71	36	65	51	69	53	53	85	71	83	55	56
ATP5SL	14	22	46	66	50	54	48	35	68	44	3	11	52	76	64	41	64	6	58	55	95	105	70	30	112	56	82	36	60	67	87	93	80	52	65	70
ATP6AP1	38	80	162	309	392	324	154	180	400	101	29	27	143	257	283	119	344	78	327	337	333	395	382	220	500	202	233	161	190	311	402	567	583	248	200	277
ATP6AP1L	3	3	5	21	18	31	1	17	15	6	5	1	9	7	2	5	6	7	3	12	66	10	30	17	10	7	16	13	15	9	13	14	31	7	7	26
ATP6AP2	64	102	351	773	855	1061	379	360	1144	357	51	50	345	838	1167	480	871	184	777	782	1204	1103	1031	664	1525	592	833	667	909	881	991	1707	2039	749	865	1027
ATP6V0A1	115	193	653	336	405	714	239	144	556	186	60	36	267	249	373	539	682	156	514	742	309	798	553	288	431	603	238	269	440	447	544	723	562	693	472	332
ATP6V0A2	50	102	240	273	264	257	196	106	283	141	62	36	164	138	246	219	296	90	180	219	196	411	237	158	340	238	262	216	241	225	251	334	352	296	241	193
ATP6V0A4	4	3	3	5	3	6	3	2	14	6	2	3	1	13	6	2	4	4	4	8	2	4	2	1	6	2	24	1	5	19	3	12	5	0	2	7
ATP6V0B	9	33	90	158	202	119	38	143	158	53	22	10	96	104	168	35	176	25	152	143	178	175	168	102	406	115	135	105	96	224	205	224	262	88	156	188
ATP6V0C	42	94	204	371	485	352	194	218	407	135	32	28	204	289	368	142	331	112	260	355	258	615	451	277	668	271	233	306	285	288	502	637	638	263	344	446
ATP6V0D1	35	58	257	289	284	386	188	193	414	177	30	26	136	179	211	165	252	60	340	425	341	774	509	144	462	140	275	216	245	314	508	401	432	206	375	342
ATP6V0D2	25	75	38	232	1356	78	68	283	94	54	81	17	185	29	938	36	61	121	133	154	65	100	399	696	954	334	126	154	211	444	281	987	1131	217	99	508
ATP6V0E1	91	203	481	526	1418	1009	509	853	1284	466	83	49	687	1372	1653	479	757	232	826	1080	1286	1243	1085	879	1534	681	906	716	909	1078	1751	2075	3023	928	977	1309
ATP6V0E2	8	9	7	8	5	26	18	10	10	14	7	3	13	4	25	11	16	6	14	16	11	41	19	13	77	8	25	14	18	30	14	12	33	19	8	10
ATP6V1A	107	278	640	895	1928	1004	495	805	1265	445	167	97	910	1722	2012	639	1232	389	1080	1290	980	1653	1823	1562	3487	1284	819	1003	1108	1541	1578	2412	2551	1111	1122	1861
ATP6V1B1	2	2	5	8	9	9	5	4	3	3	2	3	3	2	1	3	5	2	3	5	5	5	0	2	4	0	5	9	6	5	5	5	11	13	2	9
ATP6V1B2	146	415	797	516	2639	1264	514	978	1474	491	154	84	916	312	2327	613	856	385	1167	1235	929	1365	1573	2013	2390	1415	657	809	1237	1063	1649	3351	2643	1226	983	1668
ATP6V1C1	92	224	400	889	894	684	306	498	833	345	101	54	586	686	1441	640	928	264	855	948	591	1011	1050	877	1985	780	1107	625	868	1612	1164	1892	1821	937	689	1226
ATP6V1C2	66	102	397	1864	735	959	383	506	904	344	74	34	505	2247	828	441	777	145	683	908	1429	920	929	425	2667	472	1648	1053	726	1020	1472	1199	1528	581	829	1128
ATP6V1D	41	54	266	209	476	594	179	366	489	222	42	22	218	274	759	211	192	73	301	394	847	565	462	294	865	239	257	332	387	486	608	592	787	322	331	462
ATP6V1E1	54	94	260	439	626	416	241	375	609	247	106	54	370	362	901	276	409	141	326	412	556	695	527	500	870	320	312	218	467	650	515	905	810	349	435	659
ATP6V1E2	3	9	8	15	8	11	11	1	13	7	5	3	6	8	8	11	12	6	12	15	7	21	9	2	32	6	11	11	8	12	7	4	8	7	5	7
ATP6V1F	22	37	52	150	183	184	87	194	163	66	19	9	51	54	215	61	176	42	137	165	160	166	202	99	311	81	125	153	117	175	236	242	292	81	124	195
ATP6V1G1	47	85	165	347	571	383	255	407	472	233	72	23	298	349	740	262	269	120	299	332	437	535	426	297	732	224	405	501	426	623	736	842	843	331	423	845
ATP6V1G2	2	10	4	6	9	13	7	5	12	9	3	5	4	3	9	9	8	10	7	14	18	17	17	14	9	14	3	4	6	5	6	7	4	10	21	22
ATP6V1G3	0	0	3	1	0	0	0	0	1	0	0	1	1	0	0	1	1	1	0	0	8	0	1	1	1	0	2	2	0	0	1	0	1	0	1	0
ATP6V1H	35	42	126	360	371	179	101	130	243	86	34	17	158	449	488	139	168	71	177	206	156	289	223	243	377	148	141	159	184	265	253	532	471	243	170	265
ATP7A	75	153	601	470	450	464	290	192	520	224	117	54	241	368	431	506	502	177	361	407	579	1013	518	365	646	589	584	320	525	381	544	857	591	564	526	502
ATP7B	16	30	68	70	68	49	31	27	36	31	20	13	27	88	27	44	58	29	54	47	40	73	82	55	54	76	59	32	52	25	96	67	51	73	37	49
ATP8A1	49	202	720	83	241	233	169	68	185	190	36	49	296	132	363	354	97	211	263	343	94	1676	291	437	205	880	132	241	446	254	174	569	151	852	701	121
ATP8A2	7	4	13	18	12	17	3	13	14	16	5	10	16	45	15	8	19	7	6	22	8	14	26	18	42	19	21	12	22	19	40	35	55	10	24	29
ATP8B1	64	213	86	183	218	272	365	220	394	347	43	25	187	64	232	217	356	179	337	350	215	159	400	238	185	258	150	94	269	366	224	330	234	304	156	227
ATP8B2	58	95	64	525	130	220	124	100	203	112	47	21	122	237	134	147	469	65	181	223	353	157	296	108	526	131	267	158	104	472	172	216	233	163	218	232
ATP8B3	7	4	13	27	8	13	14	7	8	7	6	7	6	6	8	4	22	5	6	9	5	21	10	8	10	7	9	8	13	1	19	22	24	5	20	6
ATP8B4	70	67	1426	86	217	249	139	79	319	98	36	46	128	81	285	609	257	88	546	352	381	1568	295	284	680	1075	108	183	496	426	350	487	207	604	799	185
ATP8B5P	3	6	6	11	15	17	7	10	8	7	6	8	9	3	5	6	4	4	6	7	14	14	6	10	11	14	22	11	16	8	17	17	9	15	10	13
ATP9A	55	157	264	597	602	217	443	265	456	253	148	40	428	749	613	1073	760	165	497	344	390	610	413	423	1122	714	503	353	1041	315	315	1315	433	782	547	605
ATP9B	25	61	68	67	135	107	42	42	50	41	28	19	72	73	81	126	117	61	99	117	69	101	74	105	52	112	109	94	89	98	117	135	132	170	103	70
ATPAF1	25	59	206	151	184	279	171	145	231	111	31	16	143	217	381	327	422	96	212	257	305	468	265	246	473	239	306	293	248	304	294	502	392	317	316	337
ATPAF2	3	20	25	39	51	14	5	9	16	11	6	6	20	14	34	14	29	19	20	36	19	51	41	6	41	32	49	41	34	38	27	33	15	23	19	29
ATPBD4	17	20	24	37	33	31	46	32	31	34	13	14	39	47	53	98	46	37	54	70	56	75	79	63	43	67	55	41	92	38	59	75	55	71	51	58
ATPIF1	57	92	525	330	231	370	212	240	421	222	54	23	308	437	428	287	347	104	291	323	433	1008	323	153	740	317	394	417	396	568	669	548	509	370	450	670
ATR	74	199	314	260	570	482	281	262	433	251	122	41	475	767	418	545	646	304	667	640	358	598	652	582	528	617	795	456	578	577	549	713	553	778	504	430
ATRIP	6	13	26	26	17	23	24	20	36	12	17	6	20	11	21	10	21	19	18	28	35	32	24	22	19	30	23	15	8	22	43	28	33	20	18	15
ATRN	80	175	216	547	735	684	310	298	612	231	58	34	479	1886	456	410	1311	185	594	662	534	514	840	430	1008	441	764	427	541	353	670	873	999	591	566	613
ATRNL1	18	18	22	11	42	14	21	19	35	11	17	21	100	562	61	31	66	10	31	37	14	61	19	37	221	40	22	58	19	62	106	151	18	41	39	42
ATRX	426	1161	1230	1456	1588	2027	1705	922	1920	1191	1108	166	1375	1548	2325	2862	1079	1252	2304	2342	3052	3535	2592	2160	2403	3096	3061	2085	3225	2204	3114	4118	2850	3225	2544	3193
ATXN1	75	136	269	328	293	757	369	183	411	270	115	61	251	288	329	406	361	170	438	530	628	514	445	308	636	384	265	246	475	297	367	665	395	445	434	604
ATXN10	43	131	158	383	405	331	240	167	379	164	38	32	254	361	395	301	445	144	252	300	370	425	355	204	623	302	526	411	295	335	518	499	521	377	284	528
ATXN1L	53	126	212	386	282	375	290	180	339	217	39	29	203	306	402	536	340	129	343	394	394	451	347	273	556	386	335	289	551	274	550	774	300	457	400	441
ATXN2	140	398	524	540	625	852	480	396	687	335	192	46	429	805	667	639	1168	328	669	677	826	913	814	572	1508	827	743	523	652	614	822	921	970	771	635	838
ATXN2L	56	110	227	424	336	324	155	127	256	123	135	25	151	257	203	198	419	76	274	272	292	486	320	220	399	253	282	171	209	333	362	313	442	303	257	262
ATXN3	66	166	245	342	296	322	300	223	284	216	62	45	225	193	365	411	291	134	285	355	381	526	298	283	576	387	372	338	499	490	383	531	400	482	278	496
ATXN3L	6	3	8	1	4	4	3	1	5	4	0	4	4	4	4	6	2	4	10	4	2	11	0	2	5	0	2	5	5	2	8	2	5	2	3	5
ATXN7	153	448	1056	519	627	822	380	303	635	371	275	60	518	620	644	991	410	375	697	721	654	1296	745	723	803	1117	402	375	799	712	820	1042	495	1032	694	653
ATXN7L1	70	129	174	239	176	163	139	91	218	117	115	22	113	80	131	221	336	103	223	186	125	461	193	215	246	280	174	197	198	192	229	227	247	243	210	182
ATXN7L2	8	5	10	14	12	8	1	11	9	3	8	3	4	6	5	8	9	5	4	17	4	5	3	2	12	4	11	7	8	4	21	6	6	13	7	8
ATXN7L3	17	54	83	126	112	104	60	70	141	46	18	10	53	96	105	68	70	36	66	100	148	172	110	59	116	77	105	62	93	118	148	95	129	94	112	110
ATXN7L3B	47	125	340	513	416	527	380	308	589	300	65	49	289	825	514	635	318	117	333	390	485	977	490	285	631	426	559	503	682	471	709	1052	727	658	583	732
ATXN8OS	3	2	1	4	2	1	3	1	4	2	4	2	2	0	1	1	0	3	4	3	2	2	3	0	5	1	1	3	3	1	2	0	4	1	2	2
AUH	8	8	40	57	37	52	27	15	25	18	16	4	36	40	54	59	44	12	39	42	58	69	27	55	63	56	31	35	85	34	41	90	85	93	42	40
AUP1	27	71	174	345	250	218	102	111	213	77	57	17	126	226	179	134	151	59	186	187	211	291	195	111	392	193	189	131	161	250	237	183	184	197	186	197
AURKA	22	12	244	132	185	91	33	62	83	43	38	6	71	175	76	36	162	21	83	65	307	435	51	36	260	83	159	105	62	130	55	52	420	71	136	66
AURKAIP1	10	17	23	69	67	58	29	58	89	41	13	4	30	48	89	32	137	25	39	79	129	102	97	27	370	28	122	73	62	86	130	92	152	49	94	90
AURKAPS1	12	35	46	38	34	24	16	2	11	7	30	1	46	52	5	25	13	28	25	18	21	40	22	43	40	67	44	12	17	22	24	28	13	46	26	13
AURKB	18	7	116	48	140	11	7	8	13	9	24	5	12	47	19	5	30	3	20	14	49	101	25	5	53	32	12	20	10	42	20	3	27	14	31	9
AURKC	6	2	4	5	4	5	6	2	10	14	1	1	11	5	6	8	7	0	4	5	8	12	7	10	20	12	6	10	6	7	14	4	22	8	2	3
AUTS2	62	177	65	257	212	223	113	105	204	106	135	22	131	241	157	177	677	147	199	132	352	257	274	190	337	250	387	271	159	161	463	344	436	286	187	349
AVEN	12	34	24	69	64	217	48	53	82	31	24	14	46	60	70	57	60	23	72	153	268	95	107	50	76	56	95	37	50	85	219	78	131	71	40	81
AVIL	11	28	25	24	160	42	24	16	32	26	11	6	39	20	41	47	22	14	63	72	28	33	69	61	19	69	29	8	32	37	183	50	38	77	24	32
AVL9	45	77	139	148	129	138	69	42	92	67	66	12	79	87	97	88	87	87	120	116	85	152	117	64	142	150	78	80	94	107	110	93	133	138	119	89
AVP	0	0	3	1	1	1	1	0	1	2	1	1	0	1	0	2	0	0	2	0	0	4	1	2	1	0	2	1	1	1	0	0	0	1	0	1
AVPI1	4	8	6	32	23	18	8	6	44	16	5	2	9	55	13	45	17	7	12	24	49	13	22	18	44	20	16	4	25	23	23	16	14	21	9	25
AVPR1A	13	13	15	82	25	105	75	26	88	60	9	6	31	13	51	33	50	27	27	48	47	51	47	34	110	13	67	19	43	65	19	43	25	23	47	235
AVPR1B	3	4	1	2	4	1	3	2	2	2	1	4	4	2	3	1	5	3	4	2	2	3	1	1	2	2	3	4	1	1	4	2	2	4	2	2
AVPR2	2	1	3	2	4	13	5	2	2	1	0	4	5	3	4	3	5	4	1	7	1	3	2	5	6	1	6	3	4	4	8	8	4	3	2	4
AWAT1	2	3	2	5	2	2	2	1	1	2	3	3	3	3	2	0	4	1	7	3	2	5	1	3	2	2	5	1	4	2	2	3	0	6	2	2
AWAT2	3	2	3	1	5	4	2	5	2	2	3	4	3	1	1	3	7	1	0	3	4	6	3	0	2	2	3	1	1	1	2	2	1	3	1	2
AXIN1	15	31	56	45	36	54	30	21	48	23	18	10	35	23	24	44	29	16	23	45	38	83	38	24	48	11	44	15	22	29	25	49	30	41	41	25
AXIN2	9	22	13	78	44	32	18	25	30	19	35	11	31	66	20	47	47	10	38	34	18	41	32	20	61	19	66	42	41	22	27	35	53	50	33	29
AXL	53	68	96	276	193	624	181	183	522	149	37	19	183	81	490	547	633	96	424	435	1188	338	553	276	385	323	352	301	347	351	341	727	479	470	236	299
AZGP1	0	0	5	2	0	4	2	0	0	8	0	5	3	1	14	43	3	1	0	6	32	9	0	2	2	0	2	2	56	3	2	3	2	9	10	0
AZGP1P1	0	1	1	0	3	3	2	3	0	1	1	0	1	0	1	0	2	0	1	0	1	2	0	1	1	1	0	1	0	1	0	1	3	1	1	0
AZI1	9	12	20	25	25	11	7	2	4	9	9	2	10	10	15	11	28	8	21	21	7	25	14	16	33	9	18	13	17	15	18	15	15	32	16	17
AZI2	29	87	221	193	169	468	210	188	408	157	34	23	147	349	357	328	219	107	317	323	500	515	394	207	783	303	296	273	436	404	403	449	283	281	453	604
AZIN1	88	147	645	980	502	828	456	364	785	324	105	74	508	999	734	667	1229	217	676	785	796	1661	922	623	2224	1121	1906	950	1107	1586	1425	2241	1414	996	1166	1476
AZU1	5	1	92	3	2	4	2	2	5	5	2	1	8	4	10	8	2	7	9	8	2	496	1	12	4	14	1	7	5	4	1	5	2	16	73	5
B2M	952	969	3755	2613	5359	15119	7859	6053	18973	8193	649	587	3636	2299	14364	8408	3153	1298	8935	12573	20256	14440	8919	3789	9096	4305	7346	10568	14514	14548	17622	13134	13355	9845	8582	9638
B3GALNT1	21	43	51	186	81	140	45	69	140	48	14	13	50	89	109	90	194	51	106	83	87	116	130	61	165	95	500	249	101	276	225	163	176	118	139	235
B3GALNT2	30	120	138	566	223	357	183	177	304	149	30	19	205	665	280	235	284	81	250	255	216	375	312	186	268	249	516	251	303	331	305	395	558	230	262	299
B3GALT1	1	14	7	7	22	4	11	3	10	8	5	2	21	4	30	33	16	10	9	4	4	14	8	30	34	29	20	15	15	20	26	37	9	46	10	28
B3GALT2	12	38	46	34	60	62	42	24	128	31	17	17	45	62	31	97	60	61	78	63	22	71	87	105	63	204	85	71	113	106	50	250	33	121	139	172
B3GALT4	4	5	6	7	11	16	21	10	16	11	4	1	6	11	6	17	6	3	14	8	26	27	3	3	6	8	10	3	8	18	20	15	2	7	14	6
B3GALT5	3	2	7	9	7	8	5	8	6	13	4	4	4	1	3	1	6	4	4	6	11	4	2	2	7	8	12	5	5	6	9	6	8	5	8	7
B3GALT6	9	25	34	234	89	100	67	43	114	38	17	14	56	91	49	32	131	11	59	52	51	64	77	39	172	27	44	49	71	52	52	99	95	52	96	58
B3GALTL	22	30	36	63	92	107	39	63	110	37	9	13	44	73	72	78	68	28	65	76	96	83	127	63	177	90	78	76	74	71	85	148	118	83	81	98
B3GAT1	9	4	8	20	10	9	14	16	15	10	9	3	10	5	11	6	4	3	6	7	7	9	13	6	14	5	9	6	14	3	10	11	5	11	8	6
B3GAT2	4	4	20	8	21	31	9	20	26	19	3	1	21	9	13	6	5	8	15	25	17	27	20	10	8	21	15	16	21	14	29	47	27	17	18	39
B3GAT3	4	9	10	51	31	30	18	13	33	8	10	1	30	82	12	24	93	14	28	34	24	35	35	18	39	16	30	26	33	34	53	31	25	27	26	35
B3GNT1	14	30	34	133	65	107	68	63	96	50	29	15	47	106	102	100	65	35	57	75	79	70	98	57	81	66	125	77	94	41	71	180	117	130	91	64
B3GNT2	18	25	103	126	104	199	71	92	206	83	17	16	44	63	117	85	106	36	183	227	123	403	158	57	169	92	89	116	96	151	178	140	152	114	183	132
B3GNT3	3	10	7	5	17	14	13	2	2	8	5	4	3	2	12	4	2	1	6	14	6	14	11	12	21	14	7	3	5	10	12	20	14	11	6	10
B3GNT4	4	4	1	6	5	9	1	5	2	4	4	4	2	5	1	1	1	1	2	4	0	4	2	2	7	3	1	3	2	2	4	3	2	6	0	3
B3GNT5	22	48	180	152	128	218	132	92	166	94	31	16	211	1349	210	340	176	71	203	263	392	552	210	136	419	150	189	116	164	214	284	178	459	177	262	253
B3GNT6	3	4	8	1	4	5	2	3	3	3	4	3	3	1	3	3	3	3	6	7	1	6	3	8	4	7	4	3	4	3	2	4	7	6	1	2
B3GNT7	10	7	17	33	5	12	13	14	37	12	7	7	9	7	16	13	31	5	18	22	20	35	22	6	53	5	21	14	9	10	148	11	19	15	18	23
B3GNT8	4	4	9	3	5	3	3	6	1	5	3	2	6	1	6	3	5	6	5	1	3	15	5	0	6	4	9	4	4	1	4	5	2	6	7	5
B3GNT9	19	24	48	278	84	227	74	91	124	57	16	22	64	138	112	49	153	40	123	107	299	80	237	122	247	80	71	110	72	92	184	186	213	78	125	173
B3GNTL1	4	6	1	4	3	11	0	2	4	2	5	1	0	5	2	0	1	2	4	11	11	8	3	5	2	2	9	5	1	0	3	2	13	7	3	1
B4GALNT1	7	6	5	39	29	31	9	12	21	11	14	3	26	108	17	8	138	11	19	27	25	18	57	21	26	12	43	6	13	50	40	17	24	9	20	43
B4GALNT2	5	3	4	2	2	2	5	2	2	1	0	2	1	3	3	4	3	5	4	3	1	6	2	6	10	0	2	4	2	8	3	3	2	5	1	4
B4GALNT3	7	39	18	30	41	17	24	18	32	14	22	3	23	8	42	17	21	28	17	13	6	28	31	69	181	111	61	50	31	48	62	114	53	45	68	62
B4GALNT4	6	9	6	12	9	7	11	5	8	9	3	8	11	27	8	3	9	6	4	4	2	12	6	4	10	2	14	7	12	5	11	12	7	10	4	13
B4GALT1	172	283	710	2780	1110	4020	875	718	2153	723	166	137	735	1236	1075	823	1664	285	1582	1734	2083	2097	1851	785	3445	842	958	840	1118	1489	2001	2261	1729	979	1620	1494
B4GALT2	32	39	38	119	85	136	51	81	109	53	41	27	31	166	49	42	173	34	58	58	126	80	144	40	124	51	119	88	74	89	113	129	111	51	104	139
B4GALT3	12	25	48	125	53	70	32	18	54	24	11	17	26	62	57	20	73	18	66	65	31	94	59	32	96	41	54	49	59	42	73	57	56	34	50	46
B4GALT4	30	77	110	326	194	472	95	98	211	61	21	17	116	299	177	119	108	81	102	144	246	255	247	99	269	152	193	162	183	261	377	362	172	129	270	190
B4GALT5	67	96	953	462	626	505	254	229	474	256	66	69	339	313	600	350	699	128	455	464	505	2018	501	257	1062	494	268	259	464	327	536	688	620	525	967	442
B4GALT6	18	16	47	40	30	60	35	27	57	34	31	8	36	79	34	50	36	26	54	51	21	155	61	46	101	66	72	55	64	156	117	166	109	69	95	140
B4GALT7	2	9	7	20	23	35	13	25	17	15	8	4	22	60	11	7	32	24	16	19	45	14	25	19	18	19	34	35	17	26	32	13	61	23	22	24
B9D1	4	4	4	8	10	3	4	6	5	1	2	0	2	11	6	9	8	4	1	11	8	2	11	5	7	3	13	4	6	8	7	15	3	6	9	4
B9D2	6	6	16	6	7	15	7	7	11	2	1	2	5	14	3	11	7	3	4	12	10	33	7	4	6	4	5	8	6	1	14	16	8	23	6	16
BAALC	12	22	18	59	22	16	51	29	64	33	21	7	33	22	23	23	78	5	40	50	45	58	73	22	32	34	47	65	61	161	47	14	97	39	42	29
BAAT	4	6	10	5	7	10	11	8	5	9	3	5	10	4	4	7	3	4	8	14	7	5	7	6	7	2	8	7	11	7	6	9	6	5	6	14
BACE1	78	202	210	1072	633	969	415	420	932	360	103	54	352	388	653	577	945	225	687	762	1237	560	1133	586	1826	550	746	703	867	674	884	1614	2079	673	652	1049
BACE2	37	63	88	328	232	696	199	168	440	217	21	30	137	212	295	157	418	74	199	374	399	206	406	122	200	208	495	191	198	96	258	358	1000	261	215	319
BACH1	138	204	594	1039	654	1071	414	328	748	347	187	50	523	1180	897	657	1072	220	720	939	1018	1530	991	489	2490	676	798	471	737	999	909	962	1192	869	812	863
BACH2	31	71	77	73	104	96	93	80	139	92	42	15	141	63	163	257	345	90	118	159	125	3608	217	422	394	309	168	315	122	138	125	315	54	374	263	121
BAD	0	2	7	10	3	19	12	5	22	13	6	2	6	1	4	11	7	6	5	10	13	10	8	1	17	7	8	9	6	6	8	18	12	8	4	9
BAG1	28	58	283	260	154	220	184	191	271	170	20	17	134	140	293	194	97	54	150	203	173	677	209	170	317	160	373	284	381	249	251	375	287	218	291	265
BAG2	20	54	49	149	104	238	49	100	186	51	18	10	101	272	87	75	218	48	184	178	340	177	413	92	419	139	270	99	73	166	189	145	273	117	110	139
BAG3	27	67	36	212	187	311	122	145	210	102	36	19	175	340	592	181	337	60	186	200	256	150	310	96	278	283	127	211	126	134	289	243	231	146	150	134
BAG4	15	24	79	91	49	89	35	30	84	30	33	9	49	162	59	103	122	27	67	74	84	167	86	31	198	95	84	65	87	154	102	126	99	81	108	130
BAG5	90	119	289	767	314	376	297	188	516	226	93	43	309	374	402	413	481	106	337	398	589	624	441	263	779	372	549	395	512	520	525	702	796	462	428	557
BAGE	3	1	2	1	1	2	2	2	5	0	1	0	4	2	0	1	7	2	4	1	0	3	0	3	2	0	5	0	0	2	0	2	0	3	1	1
BAGE2	23	1	1	1	1	1	4	1	4	2	2	0	5	1	0	3	5	2	12	2	1	2	6	5	4	1	2	1	2	2	2	2	0	1	3	2
BAGE3	23	1	1	1	1	1	4	1	4	2	2	0	5	1	0	3	5	2	12	2	1	2	6	5	4	1	2	1	2	2	2	2	0	1	3	2
BAGE4	22	1	1	1	1	1	4	1	4	1	1	0	5	1	0	2	5	2	12	2	1	2	6	5	4	1	2	0	2	1	2	2	0	1	2	2
BAGE5	22	1	1	1	1	1	4	1	4	1	1	0	5	1	0	2	5	2	12	2	1	2	6	5	4	1	2	0	2	1	2	2	0	1	2	2
BAHCC1	32	42	85	158	62	89	65	47	118	67	13	19	74	55	80	92	67	37	113	73	61	258	80	51	100	86	80	57	75	51	122	121	184	114	104	90
BAHD1	15	22	41	81	56	65	42	26	85	38	16	11	36	42	45	55	60	20	45	76	37	126	45	28	56	50	74	24	60	49	99	78	80	60	52	54
BAI1	7	6	12	13	9	8	13	7	6	15	8	9	15	7	14	8	8	10	8	8	3	10	5	8	12	10	16	6	8	5	10	10	7	6	9	11
BAI2	4	9	17	6	8	8	11	10	13	11	6	8	8	6	5	2	22	4	5	10	14	6	4	7	10	2	15	6	8	6	13	14	7	7	12	11
BAI3	16	45	16	114	144	22	64	24	45	38	21	22	51	79	100	145	28	33	50	30	14	53	44	104	149	120	88	133	134	156	23	86	37	164	93	74
BAIAP2	12	17	13	48	26	28	23	29	25	10	21	17	11	15	20	27	31	11	17	18	33	19	24	14	23	21	46	30	8	27	34	36	75	22	16	25
BAIAP2L1	16	13	44	54	20	129	25	25	22	26	88	3	29	66	30	19	71	8	38	64	47	32	31	23	172	31	31	19	29	93	106	40	19	43	19	22
BAIAP2L2	7	5	1	6	4	1	4	4	4	4	7	3	3	3	1	10	7	3	6	4	0	4	4	3	8	2	9	6	10	12	10	1	8	4	1	5
BAIAP3	7	23	16	43	17	39	14	29	35	37	5	3	10	41	24	16	13	9	27	18	22	51	23	18	36	24	37	41	35	41	51	40	46	29	42	29
BAK1	6	9	7	15	15	24	3	13	19	9	4	4	6	10	25	19	21	1	19	9	15	20	13	14	20	20	19	16	21	24	27	16	22	24	12	18
BAMBI	26	233	32	294	319	64	169	128	671	95	51	35	159	314	150	279	536	192	182	142	89	160	342	491	931	1044	518	414	670	440	306	1454	231	486	1092	998
BANF1	5	7	33	72	52	67	34	43	51	20	12	8	35	40	68	19	88	16	61	49	99	99	49	29	109	30	55	53	47	61	106	87	148	29	60	92
BANF2	0	1	2	2	0	0	1	0	0	0	2	1	0	0	0	1	2	1	1	0	1	1	1	0	0	1	1	2	0	1	1	2	0	1	0	0
BANK1	5	5	65	18	14	66	33	26	44	53	15	7	20	16	53	93	35	20	40	39	200	292	47	30	39	42	12	49	72	27	44	82	41	66	84	21
BANP	8	12	8	35	17	21	15	13	22	12	12	2	5	21	17	15	19	6	8	7	15	29	24	10	65	16	24	15	17	15	17	18	32	16	15	17
BAP1	15	48	91	179	108	160	82	72	119	64	30	9	79	136	123	111	128	38	117	98	153	244	133	69	157	100	112	103	121	103	195	207	153	158	118	130
BARD1	34	39	108	68	79	99	68	67	84	87	51	9	94	96	180	189	284	50	82	86	196	347	122	93	937	155	225	218	172	224	233	317	288	208	194	287
BARHL1	4	3	8	6	6	6	11	11	6	12	8	3	5	3	4	12	8	4	5	2	3	13	4	8	11	8	9	7	5	7	11	12	11	8	5	9
BARHL2	4	4	4	7	5	4	9	7	12	11	6	4	5	3	3	3	4	5	3	3	3	3	2	4	8	3	11	3	3	6	7	7	1	2	6	7
BARX1	5	1	2	7	2	12	8	5	2	7	4	4	6	2	1	2	7	2	3	7	2	6	3	0	10	3	17	0	4	9	15	7	0	9	5	3
BARX2	3	1	2	3	5	2	3	4	4	2	5	1	5	4	2	2	3	2	5	4	3	3	3	3	3	6	4	3	1	3	2	3	2	1	5	4
BASE	1	1	0	0	1	2	1	2	2	4	0	0	1	0	1	0	3	0	2	0	1	4	4	0	0	0	2	4	0	1	0	2	1	1	1	2
BASP1	55	80	632	975	430	1012	152	609	707	229	101	58	527	4190	415	213	2079	170	549	833	1666	1388	1188	334	1142	238	524	451	271	980	797	304	2278	343	951	1060
BASP1P1	1	2	3	0	2	6	2	4	3	4	2	2	4	1	2	3	2	1	3	1	1	4	3	1	2	4	4	4	4	2	3	5	3	2	1	3
BAT1	66	228	357	505	460	343	179	168	244	137	122	31	249	346	255	290	224	141	399	313	538	599	444	286	617	496	554	291	343	657	360	468	272	493	337	344
BAT2	101	161	256	592	292	366	224	192	361	171	147	49	233	441	306	289	572	158	375	336	743	817	555	204	652	289	640	285	318	380	556	687	343	350	391	451
BAT2L1	145	360	353	662	776	697	548	345	680	406	231	72	508	877	479	702	1039	279	727	622	473	863	693	556	644	708	580	507	746	485	874	1162	753	903	562	722
BAT2L2	1813	3592	4381	7308	6426	6246	3917	2898	5127	3064	3374	464	3734	6408	4729	6299	9653	2684	5612	5327	3683	7211	6821	4369	8677	5868	5962	3585	5469	8719	6133	7553	10951	7405	5327	4573
BAT3	54	63	218	377	241	219	129	108	201	116	31	20	110	201	207	152	263	73	178	215	252	387	321	108	460	149	325	175	180	291	228	319	203	202	217	207
BAT5	20	15	83	85	60	98	43	44	96	35	5	10	42	53	58	37	36	12	77	69	157	128	89	42	88	87	88	35	67	104	67	105	72	60	68	69
BATF	2	2	11	6	3	22	1	7	4	12	2	3	4	1	7	4	2	1	1	15	8	15	12	3	10	1	8	5	8	15	8	4	5	7	2	4
BATF2	1	1	6	8	9	22	7	5	16	5	4	2	7	3	8	15	5	1	5	13	10	5	14	4	8	3	9	14	14	19	30	20	6	10	7	6
BATF3	2	0	7	28	7	7	5	7	3	8	3	1	5	2	12	6	6	0	13	7	8	10	6	5	28	6	11	7	22	14	17	14	7	3	9	8
BAX	3	11	21	27	21	34	19	12	27	2	3	1	15	19	14	7	14	5	22	16	17	26	32	3	15	13	6	7	14	13	19	4	27	14	19	14
BAZ1A	153	358	1893	971	790	1022	527	563	1110	537	240	75	587	1314	928	795	795	356	1004	1237	1136	3344	1158	528	1682	965	1432	939	899	1280	1060	833	1896	1039	1763	731
BAZ1B	303	776	1272	1078	1350	1702	1233	939	1884	870	932	118	949	1236	1566	1520	2626	648	1622	1413	2149	2633	1733	1089	3110	1429	2489	1868	1794	2105	1799	2616	3928	1977	1765	2130
BAZ2A	207	330	759	667	618	581	436	256	640	361	244	44	473	356	454	815	529	244	594	631	402	1526	563	447	720	873	638	517	736	624	1039	832	640	933	709	599
BAZ2B	357	1318	1874	891	1885	1498	1156	592	1236	831	395	123	1043	575	1624	2534	651	886	1839	1815	891	2607	1576	1917	1415	2600	1247	1152	1952	1538	1229	2486	1246	2884	2112	1422
BBC3	6	7	12	13	11	16	6	7	7	11	3	3	5	14	2	6	9	5	6	8	15	12	6	1	8	2	6	6	4	14	20	16	9	9	6	9
BBOX1	3	1	1	5	5	4	9	1	3	4	6	4	23	69	14	35	8	3	20	8	27	13	15	6	3	5	2	4	10	7	11	19	27	3	9	4
BBS1	20	24	34	78	72	69	45	39	80	46	20	6	34	65	64	74	92	17	65	71	52	70	95	47	84	81	99	74	75	44	108	184	123	140	61	100
BBS10	28	38	103	199	110	339	142	105	215	106	27	12	146	225	302	312	426	70	229	274	348	407	326	178	423	315	392	345	447	246	1746	557	497	376	238	449
BBS12	10	15	50	52	38	60	39	34	50	30	5	14	35	16	68	60	71	18	58	60	99	84	94	47	212	61	76	52	52	55	81	124	76	69	75	100
BBS2	40	52	93	188	189	245	145	69	224	104	17	14	91	137	200	267	129	43	186	220	135	187	178	132	137	215	284	205	216	121	197	301	136	337	167	177
BBS4	17	28	50	51	97	112	64	62	88	48	20	10	66	128	104	120	104	24	142	126	229	94	104	82	166	127	90	92	105	100	177	151	143	127	83	157
BBS5	7	11	9	22	17	12	12	16	13	15	4	3	19	12	20	17	25	5	19	26	11	15	17	32	34	14	39	23	15	33	35	20	47	25	10	14
BBS7	21	56	150	152	198	188	153	132	215	112	29	27	149	178	210	198	177	52	137	177	292	226	184	167	524	258	240	174	229	155	218	353	584	292	207	229
BBS9	74	205	160	351	553	441	301	189	341	179	111	24	215	154	346	469	448	178	447	375	330	329	508	344	888	563	214	230	426	329	439	619	460	594	438	611
BBX	115	250	418	780	659	1062	632	417	871	451	151	79	656	2005	1089	1436	1013	287	809	791	1368	1382	931	686	2078	1103	942	770	1190	1137	1202	1738	1165	1153	878	1071
BCAM	8	14	19	7	15	11	15	20	9	22	3	12	17	35	20	19	18	4	11	13	7	41	16	10	17	17	12	7	24	8	10	33	7	30	15	9
BCAN	7	10	2	3	9	6	7	7	8	7	9	7	15	8	5	11	11	5	5	10	4	6	1	8	10	7	13	6	6	7	9	10	3	5	7	15
BCAP29	56	149	326	344	376	429	452	230	458	349	48	36	247	142	458	506	421	182	413	403	612	575	571	357	609	366	395	511	619	405	453	632	693	545	414	606
BCAP31	19	18	63	144	87	137	66	58	168	75	15	14	85	271	84	58	97	32	89	135	99	138	112	58	156	57	142	88	92	95	139	148	274	78	79	118
BCAR1	13	19	10	26	30	31	24	21	54	22	9	8	21	21	27	25	35	12	26	31	25	27	31	29	40	17	26	8	39	22	41	43	25	25	26	45
BCAR3	17	41	25	45	122	106	76	45	74	32	35	6	54	68	98	107	194	41	81	107	257	56	134	91	294	95	82	21	115	145	120	174	174	100	96	91
BCAR4	2	3	3	4	2	3	1	2	1	2	1	1	1	1	3	3	4	2	3	3	3	0	1	1	2	2	3	0	1	0	0	1	3	3	5	3
BCAS1	4	5	5	8	4	3	6	7	10	4	10	1	3	7	3	12	15	4	5	10	5	12	3	13	21	7	29	30	8	10	9	11	5	11	4	11
BCAS2	12	30	76	174	119	167	94	121	201	87	29	12	120	159	221	163	227	28	139	209	333	243	196	116	444	108	189	204	169	343	260	206	270	143	194	305
BCAS3	44	166	166	152	281	201	111	89	171	93	45	14	161	205	151	228	354	125	244	191	171	283	214	204	206	300	162	162	201	554	129	295	285	308	228	207
BCAS4	2	2	2	2	5	9	6	4	10	3	2	2	6	8	4	15	2	3	9	4	10	17	2	4	6	7	18	4	20	11	12	15	4	3	2	4
BCAT1	115	174	203	758	605	1952	335	593	1170	263	131	69	385	672	582	403	1002	177	1349	1632	1054	666	1596	333	4968	576	3258	1319	741	1554	2820	881	2042	636	1142	2451
BCAT2	2	8	18	50	31	30	12	9	18	15	5	2	10	32	17	23	17	10	8	23	30	36	23	6	23	18	20	25	33	19	26	59	25	20	22	28
BCCIP	45	72	315	278	335	327	239	229	517	288	73	27	263	459	527	358	250	98	373	328	608	623	358	245	443	250	460	336	555	394	592	605	512	382	416	513
BCDIN3D	9	3	45	35	70	66	22	28	53	54	11	9	30	60	37	28	60	20	39	40	54	67	36	24	43	30	67	67	68	63	55	61	54	39	44	56
BCHE	10	10	7	8	18	4	24	10	9	8	7	10	16	2	17	13	5	6	11	19	19	16	20	16	19	6	15	19	16	11	17	3	7	25	8	22
BCKDHA	1	7	11	23	23	27	17	24	20	14	7	4	11	12	32	28	45	6	9	18	26	62	31	15	65	25	30	44	27	26	32	49	24	25	10	20
BCKDHB	29	77	50	104	140	138	102	68	125	55	19	15	64	125	113	145	86	55	117	146	69	124	167	106	140	203	196	170	201	155	188	249	225	147	127	194
BCKDK	9	13	34	102	32	77	44	37	70	30	10	10	18	67	45	30	55	13	47	69	77	79	91	27	80	38	48	45	44	59	80	62	81	36	50	72
BCL10	28	36	71	156	139	130	84	94	191	82	16	19	59	73	79	103	160	54	110	170	222	191	133	86	296	88	115	91	128	135	118	175	200	98	111	213
BCL11A	29	24	142	59	119	39	25	32	44	28	18	24	40	82	35	32	38	30	42	71	25	576	89	45	76	82	100	85	49	33	56	30	52	49	124	20
BCL11B	27	25	25	112	46	69	70	50	60	66	29	17	51	106	49	97	82	33	55	70	66	57	57	21	37	37	93	81	89	42	85	92	144	56	36	45
BCL2	37	61	137	191	220	122	200	77	274	144	32	22	118	55	284	583	423	83	185	136	159	233	237	126	343	291	186	176	351	220	244	476	304	476	286	334
BCL2A1	2	5	43	11	17	73	24	21	39	18	8	4	5	14	118	170	5	13	31	83	19	240	28	17	293	45	3	30	29	22	30	5	17	49	134	23
BCL2L1	26	64	327	107	118	154	109	105	198	118	30	10	79	58	124	108	106	56	140	130	119	785	154	100	143	226	71	134	296	114	123	184	143	208	265	134
BCL2L10	2	1	1	1	2	1	5	2	1	3	4	2	2	0	3	3	0	0	1	5	1	2	3	2	6	2	4	3	0	2	0	2	3	3	1	1
BCL2L11	31	89	271	415	350	187	166	93	264	154	45	28	106	142	167	309	318	100	179	255	203	472	209	241	523	301	175	159	263	261	173	436	308	351	231	272
BCL2L12	9	28	18	26	20	16	8	6	10	15	9	3	13	21	9	8	14	8	13	4	20	26	15	13	47	21	25	16	17	29	15	12	26	24	18	8
BCL2L13	26	29	122	189	152	120	82	76	143	88	22	14	95	141	205	134	117	51	130	166	172	288	163	98	279	112	133	90	121	166	156	294	212	113	135	144
BCL2L14	4	2	8	5	4	3	7	4	2	7	4	6	4	1	3	7	3	6	6	5	0	4	6	6	6	9	6	4	6	5	18	5	1	8	1	5
BCL2L15	17	16	140	12	13	19	14	12	7	22	10	16	18	9	17	17	18	11	17	14	16	357	29	22	26	52	13	22	30	20	14	26	21	51	115	25
BCL2L2	46	56	111	242	140	177	141	76	269	125	39	20	128	191	209	220	122	45	198	219	193	190	189	160	237	145	154	153	300	296	180	284	268	276	213	379
BCL3	14	14	19	37	25	50	20	21	52	15	13	2	20	28	24	28	42	11	32	52	32	37	36	13	59	7	17	17	27	40	63	16	30	28	17	16
BCL6	43	154	639	211	400	517	138	128	351	171	64	32	446	706	836	1378	380	146	300	332	292	773	368	310	914	713	223	265	534	219	441	786	397	1021	418	272
BCL6B	33	110	92	209	363	259	660	254	542	636	35	25	202	51	324	335	183	89	219	432	292	132	346	193	274	116	229	115	479	185	258	262	153	279	179	333
BCL7A	7	13	37	42	44	48	27	28	30	28	7	5	48	72	60	83	61	24	36	44	26	463	58	59	91	63	80	62	59	31	51	60	61	63	56	34
BCL7B	12	18	45	82	39	102	36	46	97	43	9	10	42	38	83	84	48	25	68	69	111	140	58	41	116	61	77	81	91	83	40	81	106	55	58	101
BCL7C	7	7	8	25	13	19	13	10	5	2	3	1	2	3	4	7	10	4	5	6	3	12	9	6	9	3	4	3	10	5	11	14	9	7	8	17
BCL8	0	0	1	1	0	0	1	3	0	1	0	0	1	26	0	2	0	1	1	0	4	0	0	0	0	0	0	0	0	1	4	0	1	1	0	2
BCL9	20	101	84	277	99	140	97	75	117	87	42	26	105	172	127	150	482	65	138	116	238	143	171	174	214	261	157	109	170	100	190	450	263	271	157	200
BCL9L	43	73	83	280	182	307	130	106	187	113	28	28	103	86	148	233	269	56	149	221	251	170	257	112	165	132	182	149	174	74	282	217	308	186	135	190
BCLAF1	328	1266	1599	1367	1742	1960	1291	975	1723	1074	460	129	1288	2119	2337	2943	2671	1195	2258	2383	2125	3091	2580	2051	2309	2419	1615	1597	2274	1665	2954	3328	2123	2695	2679	2232
BCMO1	4	4	6	1	5	14	8	6	15	8	2	2	4	2	5	5	4	4	4	12	7	6	5	4	9	3	3	3	4	4	7	6	3	6	5	6
BCO2	6	26	10	14	24	4	13	12	24	20	1	5	33	9	14	28	4	9	12	22	6	12	11	14	16	70	22	9	21	19	9	38	19	39	9	15
BCOR	48	111	292	513	446	289	156	149	275	197	74	32	195	220	292	453	575	94	357	334	376	1041	343	302	412	395	345	305	293	301	345	535	428	488	431	360
BCORL1	43	33	135	134	99	114	71	48	70	72	48	33	66	75	50	103	128	30	75	98	120	219	101	75	119	144	126	97	102	80	128	121	162	139	158	133
BCORP1	15	2	36	20	8	13	2	15	7	19	6	7	15	6	8	7	11	5	13	6	5	25	18	9	31	15	20	10	11	14	10	4	7	7	9	12
BCR	17	21	40	29	39	43	25	24	35	33	27	10	39	14	27	44	41	19	34	38	39	111	35	32	34	36	23	44	48	32	67	45	22	45	44	32
BCRP2	1	2	2	1	7	1	2	1	0	2	1	2	1	3	0	0	2	1	3	1	1	6	1	4	2	0	4	1	5	2	5	0	0	2	0	2
BCRP3	0	0	2	1	1	1	0	0	2	1	2	1	1	0	1	4	1	0	0	0	0	5	0	0	3	0	3	1	4	0	1	0	1	1	0	0
BCS1L	11	12	26	46	25	31	26	28	20	12	8	5	41	36	32	37	24	7	28	31	25	43	27	22	16	28	31	21	24	25	36	58	35	35	26	42
BCYRN1	1	0	1	0	0	0	0	0	0	0	0	0	0	6	0	3	0	2	0	1	0	1	0	0	1	0	2	8	1	3	2	7	1	2	2	3
BDH1	9	22	62	36	51	17	17	30	20	20	10	9	38	108	53	17	30	9	24	21	25	62	19	54	40	43	23	37	32	46	43	59	51	35	42	17
BDH2	9	50	56	76	133	177	110	79	161	67	13	14	112	57	141	143	25	40	148	136	119	99	104	149	142	118	57	116	135	80	167	184	113	186	86	191
BDKRB1	5	2	1	16	3	7	3	0	6	3	1	0	1	3	4	2	9	4	1	3	4	3	1	2	11	2	0	3	2	4	2	4	5	2	3	4
BDKRB2	9	15	13	44	25	55	41	31	70	57	21	4	28	17	40	35	27	14	43	51	39	15	56	8	45	16	20	22	27	32	59	22	22	25	20	13
BDNF	20	28	49	59	139	37	35	34	47	28	32	11	37	78	19	38	35	23	51	22	23	54	35	23	74	41	32	32	27	108	81	29	47	49	45	24
BDNF-AS1	5	21	10	27	41	26	12	13	14	12	10	8	11	15	35	17	22	12	18	13	11	20	28	25	20	30	31	36	21	41	61	40	43	26	23	32
BDP1	380	1185	1374	873	1446	1362	1147	706	1256	859	722	140	1132	1367	1440	1926	1335	909	1806	1701	1026	2476	1546	1493	2001	2132	2127	1475	1886	2580	2140	2355	1530	2128	1907	2149
BEAN1	10	10	14	22	40	13	8	5	7	18	9	6	9	3	12	11	23	8	11	9	23	13	13	12	8	11	23	16	12	20	16	11	12	25	5	20
BECN1	39	43	116	122	143	221	129	126	177	87	19	20	111	167	180	119	100	39	131	171	160	220	160	104	232	100	131	199	208	209	231	203	198	122	177	198
BEGAIN	5	5	10	10	9	5	2	7	7	6	6	3	3	3	2	7	7	4	3	4	2	12	7	6	10	6	3	12	6	12	15	9	5	3	3	10
BEND2	31	10	31	15	13	9	13	24	7	24	11	29	17	5	34	32	17	10	11	20	11	29	11	7	17	12	15	17	54	12	19	27	10	12	11	15
BEND3	14	22	17	76	45	26	28	23	48	33	24	10	30	62	41	31	36	16	29	36	48	69	50	39	68	31	39	31	62	45	56	79	49	62	42	63
BEND4	19	21	32	31	24	19	21	27	14	27	18	16	15	13	25	22	21	19	17	30	7	129	13	23	33	43	22	17	24	18	21	28	17	25	29	21
BEND5	7	13	10	31	11	12	34	35	35	51	23	3	8	13	38	45	68	12	28	21	36	71	18	38	517	45	30	62	64	31	43	133	28	48	56	153
BEND6	34	39	16	68	116	186	43	71	146	44	29	8	60	66	60	36	224	53	95	80	301	87	247	69	217	67	98	93	121	104	84	133	323	50	97	207
BEND7	8	10	29	7	15	24	26	13	20	20	5	2	23	7	20	37	15	7	24	42	20	12	14	20	10	21	29	8	42	21	5	16	7	34	14	19
BEST1	17	18	72	64	37	52	27	35	87	40	3	7	26	51	63	79	31	11	67	82	25	73	82	38	76	80	36	40	54	30	93	58	41	59	90	43
BEST2	2	2	3	1	2	3	2	1	3	0	3	1	2	1	0	2	2	1	1	1	2	1	3	0	2	1	4	2	2	4	7	2	1	4	2	1
BEST3	8	6	124	14	15	13	7	14	5	11	13	3	70	4	30	3	6	5	5	11	4	135	12	27	8	53	6	40	12	5	6	16	2	24	21	6
BEST4	5	3	2	3	8	5	1	3	4	3	4	0	4	2	4	5	4	1	7	7	2	7	4	8	4	5	3	4	7	2	4	11	2	6	3	8
BET1	21	36	58	189	104	123	83	60	106	72	21	14	80	145	132	91	171	45	159	122	212	181	153	96	257	155	160	276	179	308	221	232	349	168	179	254
BET1L	26	76	111	394	260	427	115	149	247	188	14	32	162	251	236	254	202	121	262	225	373	319	513	190	342	226	264	193	303	234	424	442	636	234	339	381
BET3L	6	0	7	0	2	4	7	3	2	2	1	0	0	1	4	7	3	1	1	1	2	4	5	0	3	2	0	2	12	8	4	14	1	7	3	1
BEX1	0	5	172	5	1	5	4	4	4	5	2	2	4	5	17	24	3	4	4	2	0	240	7	5	3	6	6	2	24	34	14	7	3	17	128	15
BEX2	2	4	21	3	2	14	10	11	3	6	2	4	14	14	40	54	10	5	4	8	4	33	11	7	7	7	12	16	13	79	55	14	5	30	8	11
BEX4	12	29	75	52	102	102	68	65	164	65	11	12	31	12	163	119	30	31	74	100	125	203	117	73	155	101	61	83	169	242	185	280	96	122	161	185
BEX5	3	3	1	9	13	5	10	6	8	17	3	1	6	2	32	29	3	2	3	7	2	9	6	6	6	15	5	11	15	66	23	23	2	25	24	11
BFAR	40	58	137	359	283	332	195	198	295	192	41	27	172	285	277	182	290	52	240	283	412	396	326	147	526	208	516	338	296	324	411	447	580	263	327	469
BFSP1	27	23	17	33	28	30	28	31	34	35	17	23	17	12	16	16	48	8	11	28	37	18	57	42	185	11	40	29	34	69	103	45	50	33	22	63
BFSP2	1	3	1	5	2	6	2	1	6	1	5	1	3	0	3	3	3	0	4	3	1	6	4	5	1	3	4	5	2	0	2	3	2	1	2	2
BGLAP	13	238	41	48	168	23	279	67	1035	124	24	28	152	21	383	274	209	211	107	218	20	502	309	975	40	1364	50	687	1544	35	344	4504	25	943	1597	868
BGN	1257	3768	979	10840	3213	13011	4247	5597	12328	3794	708	507	2357	794	5138	1779	16482	4574	6280	6715	9605	4723	13256	6069	10130	6171	9913	5507	7392	4244	11576	15283	17070	5601	8846	16410
BHLHA15	1	2	0	1	1	2	3	1	0	3	1	2	0	0	0	0	1	2	1	3	0	5	1	1	2	0	3	0	2	1	2	0	0	1	1	3
BHLHA9	3	0	1	3	1	2	0	4	1	2	3	1	4	3	2	2	2	2	0	2	4	2	0	1	6	4	3	1	5	5	6	3	3	1	2	2
BHLHB9	15	36	43	90	53	55	40	50	59	54	11	15	46	81	83	130	87	29	62	70	81	81	95	60	108	129	87	60	109	163	61	148	229	114	62	165
BHLHE22	11	7	12	12	11	44	17	12	14	11	6	9	23	7	12	8	11	4	24	19	21	14	13	12	7	14	15	10	8	15	47	12	13	10	6	6
BHLHE23	1	5	3	2	1	5	4	3	0	4	4	0	2	1	3	4	1	2	1	6	2	5	0	1	6	2	6	6	3	3	4	4	4	3	4	4
BHLHE40	221	383	232	1123	1932	1224	272	568	1223	377	769	57	738	782	1496	2468	1597	328	931	1733	1645	518	1071	548	4181	821	555	343	616	616	916	616	2036	638	700	1502
BHLHE41	47	39	90	119	135	339	154	122	284	164	31	19	155	78	383	496	330	59	233	300	1085	277	329	163	406	210	242	215	255	165	1728	611	496	345	264	449
BHMT	1	7	2	13	5	3	3	2	3	2	3	4	6	2	6	3	8	7	8	7	4	9	7	7	13	8	4	4	6	23	5	6	2	4	2	5
BHMT2	3	18	3	22	7	17	26	10	46	13	10	3	26	6	37	59	35	7	45	34	22	20	17	43	177	32	9	9	68	177	23	72	6	24	23	36
BICC1	79	213	109	512	254	856	251	320	646	217	99	59	258	55	671	343	631	173	559	445	437	302	610	447	922	489	489	369	561	428	750	1085	722	425	521	981
BICD1	48	245	125	175	430	413	131	116	253	124	176	27	234	320	278	183	243	112	352	265	250	195	336	350	330	407	443	233	169	534	222	481	286	314	169	287
BICD2	36	71	142	235	228	243	153	104	213	133	44	28	147	251	200	244	249	62	283	242	319	449	294	186	388	249	229	198	297	238	307	366	450	322	321	236
BID	15	25	121	70	89	98	58	93	142	69	27	8	83	88	102	83	73	31	95	140	102	215	139	67	179	57	111	99	99	119	187	138	134	82	128	148
BIK	2	0	4	0	2	1	0	1	2	3	3	1	1	2	0	0	2	2	2	4	1	5	2	0	5	1	1	1	2	2	1	1	1	7	0	2
BIN1	9	8	6	71	23	49	26	18	41	28	10	1	88	29	67	37	58	17	40	31	61	35	33	17	51	17	49	100	33	37	98	38	59	36	39	53
BIN2	18	23	672	87	132	133	130	46	154	100	24	17	55	20	95	163	44	18	154	203	60	671	104	68	145	145	41	107	223	129	134	100	92	193	292	111
BIN3	5	10	22	16	20	17	22	13	13	9	6	9	7	7	16	9	14	3	26	19	10	21	10	21	6	19	14	14	4	7	11	35	9	26	14	16
BIRC2	72	171	403	449	355	501	231	318	567	230	100	38	454	409	591	664	623	213	581	657	674	1319	696	429	2058	866	919	826	872	916	1039	1046	1022	860	936	1187
BIRC3	38	75	149	99	500	401	261	192	393	352	95	21	293	80	651	584	90	127	318	318	266	786	393	495	1084	393	135	328	497	374	579	690	326	367	462	708
BIRC5	28	16	210	233	126	49	21	90	109	36	11	14	50	171	75	19	147	20	76	44	414	425	62	43	291	55	158	152	30	171	110	59	343	37	119	88
BIRC6	335	1055	1597	1353	2410	1893	1146	726	1526	893	507	109	1249	1306	1410	2220	1976	968	2150	2189	1569	2825	1909	1765	2765	2538	2468	1613	1836	1823	1883	2509	3111	3034	1952	1639
BIRC7	1	2	3	5	4	7	2	1	1	4	3	3	1	4	4	2	2	3	1	6	3	1	1	1	3	2	2	2	3	0	3	1	2	2	1	2
BIRC8	2	2	1	2	4	7	4	6	4	5	4	3	5	2	3	2	4	0	2	2	2	8	2	8	4	1	2	3	1	2	3	2	4	1	8	6
BIVM	20	104	91	244	212	285	154	94	195	105	85	11	172	221	171	214	160	98	222	201	389	295	281	243	280	314	285	174	250	272	378	410	455	357	201	365
BLCAP	44	61	134	689	407	289	213	174	361	152	38	39	322	424	632	258	203	42	223	242	272	322	280	139	233	201	189	409	403	234	263	422	562	287	197	283
BLID	0	2	4	1	18	4	5	4	1	4	9	7	8	3	4	5	5	2	4	12	0	2	4	11	11	16	4	5	5	10	4	3	3	26	7	3
BLK	4	3	6	7	6	4	8	2	3	17	4	8	6	2	3	2	7	6	3	3	0	44	4	7	5	4	1	3	5	4	3	17	0	3	2	5
BLM	36	24	236	104	124	77	50	50	80	47	50	13	48	93	86	46	193	32	78	67	136	517	91	92	159	138	97	115	78	187	131	76	206	76	162	77
BLMH	36	84	151	240	428	391	230	217	292	164	41	18	194	334	293	151	260	85	198	273	365	348	225	165	481	207	427	305	296	319	337	440	240	205	253	314
BLNK	30	19	53	104	53	210	45	75	168	71	9	9	29	26	57	71	124	20	141	169	113	425	144	71	89	67	51	47	99	146	134	117	144	109	142	96
BLOC1S1	17	17	66	108	69	110	75	85	128	93	9	6	52	43	110	51	89	25	58	107	173	226	167	35	144	63	90	109	90	83	214	136	103	65	112	150
BLOC1S2	17	29	87	72	75	147	94	73	194	66	16	6	72	156	136	102	73	47	119	175	156	221	228	55	211	52	104	109	96	205	255	159	181	111	103	154
BLOC1S3	16	16	37	71	48	56	31	40	44	12	10	10	31	31	30	31	50	17	59	36	46	74	66	29	45	39	32	42	52	27	45	61	58	29	66	36
BLVRA	36	36	121	205	193	223	167	143	371	129	20	7	93	96	224	121	130	34	211	234	220	215	231	100	184	88	147	171	252	249	373	284	296	162	184	262
BLVRB	22	14	423	99	85	80	76	76	206	68	9	14	39	118	83	67	77	21	120	181	123	1173	89	37	96	101	66	92	174	133	185	125	65	123	242	120
BLZF1	71	102	197	148	198	329	155	143	303	179	64	21	131	251	251	244	324	94	249	239	209	406	309	195	502	220	329	225	310	285	404	441	388	284	297	411
BMF	23	24	88	234	188	188	82	78	262	102	22	21	73	35	98	114	327	40	146	265	170	267	203	133	251	124	109	118	140	210	202	284	269	182	114	207
BMI1	59	76	163	302	482	299	260	177	264	225	44	36	165	289	431	450	322	87	285	320	385	423	300	290	607	416	434	403	557	340	559	744	342	455	435	630
BMP1	19	47	32	73	111	161	27	81	92	32	17	12	56	44	44	26	206	37	68	106	80	49	146	58	120	62	85	57	31	72	88	60	163	66	83	77
BMP10	3	0	4	5	3	4	4	2	1	4	1	1	2	1	3	5	4	5	1	4	1	1	1	1	3	2	2	2	3	3	4	4	3	3	2	4
BMP15	2	4	2	2	5	2	4	1	2	1	3	1	1	1	1	2	2	0	2	0	0	5	0	3	2	3	2	2	4	1	5	1	2	2	0	3
BMP2	18	40	49	127	270	74	75	71	158	96	22	19	82	31	184	231	186	31	125	108	28	104	124	107	688	224	162	109	179	357	159	287	66	182	149	300
BMP2K	175	508	1242	915	1219	1230	497	577	1444	508	231	85	467	296	997	641	1891	480	1587	1420	1062	1936	1757	1015	1914	1501	961	1017	948	1574	1544	1952	1817	1089	1521	1382
BMP3	25	48	40	50	238	11	72	83	133	68	25	11	135	28	299	426	251	64	115	102	23	767	342	507	584	562	570	541	431	254	354	963	405	416	172	325
BMP4	7	55	26	174	87	95	134	27	120	107	17	12	72	9	127	248	255	79	162	124	197	89	111	159	324	278	141	136	168	213	171	517	274	233	149	145
BMP5	13	46	44	90	36	16	214	46	55	181	14	13	38	27	165	412	45	27	88	139	10	203	21	250	81	253	14	101	588	222	17	653	10	348	108	145
BMP6	35	48	118	280	105	225	230	93	240	131	28	13	63	180	129	152	138	58	150	177	128	214	111	96	195	144	179	122	209	180	211	263	88	200	239	136
BMP7	13	11	18	47	58	13	16	12	42	17	9	13	11	30	84	168	74	4	15	35	19	30	28	51	58	84	32	21	47	84	19	369	17	80	46	22
BMP8A	17	37	27	145	321	50	61	76	148	44	18	12	108	25	261	216	159	60	85	81	39	85	132	452	791	369	138	121	267	200	105	1175	109	336	193	337
BMP8B	6	32	13	64	81	27	16	41	77	22	17	12	34	15	117	61	77	31	37	33	4	39	65	188	682	126	95	77	111	111	7	15	11	107	116	211
BMPER	16	13	36	86	87	104	94	43	134	141	18	18	60	79	152	172	92	35	123	164	92	168	104	85	672	175	36	140	205	17	81	325	69	165	302	189
BMPR1A	16	36	41	78	51	132	117	87	162	62	13	11	77	91	168	221	139	35	113	97	184	106	188	160	252	193	172	124	191	110	172	414	197	264	116	343
BMPR1B	15	8	17	21	12	39	14	17	17	17	3	7	40	251	46	19	32	18	19	26	121	39	23	26	29	20	73	54	8	33	36	14	10	23	7	25
BMPR2	237	691	568	2444	2013	3258	2295	1397	2347	1423	221	145	1523	1540	2598	2781	2528	876	2528	2822	2637	1738	3448	2310	6618	2656	2808	2034	3166	2013	2669	5638	3273	2773	2561	3476
BMS1	180	308	276	537	514	499	290	335	528	290	265	45	358	521	482	433	762	211	481	521	911	555	624	391	443	400	853	455	547	591	594	709	1881	690	544	612
BMS1P1	0	3	2	2	4	0	0	0	0	2	1	1	2	1	0	0	0	0	1	0	0	3	5	2	0	2	0	8	0	2	0	1	4	1	1	1
BMS1P4	3	9	23	14	25	29	10	6	6	6	6	1	10	19	19	21	15	11	29	24	2	18	15	26	22	31	6	11	20	12	11	14	18	48	18	13
BMS1P5	0	3	2	2	4	0	0	0	0	2	1	1	2	1	0	0	0	0	1	0	0	3	5	2	0	2	0	8	0	2	0	1	4	1	1	1
BMX	4	13	77	12	35	37	53	11	33	22	7	1	41	3	69	54	17	10	35	53	5	132	32	23	11	56	16	15	50	8	20	54	2	94	94	33
BNC1	8	12	14	14	9	30	9	8	8	14	6	15	14	87	9	9	10	8	23	17	12	15	19	10	9	9	18	12	16	12	11	8	45	19	7	19
BNC2	109	112	71	337	444	1118	221	303	299	184	90	60	354	148	397	249	684	144	584	593	1466	299	806	210	458	121	226	489	219	230	680	232	439	201	181	289
BNIP1	10	12	11	34	11	18	13	20	20	25	7	5	12	14	12	10	16	2	13	23	51	18	9	9	8	10	21	22	13	20	27	15	44	8	14	26
BNIP2	67	88	387	257	233	485	407	280	656	377	74	33	301	376	700	651	461	159	584	693	820	1586	616	381	1014	582	652	612	904	669	929	1050	1074	834	840	836
BNIP3	10	16	33	156	44	34	37	37	85	18	18	15	34	108	76	69	55	8	42	46	135	35	71	30	216	29	144	52	62	83	213	93	81	51	76	306
BNIP3L	81	193	2172	858	627	859	802	733	1208	808	91	75	502	405	1009	1585	987	254	777	1096	1287	5108	1102	643	3662	1055	1307	1147	2511	817	1126	1907	844	1113	1957	2545
BNIPL	5	4	6	3	8	8	1	6	3	5	5	2	4	7	4	6	1	1	2	3	1	8	3	8	16	6	5	4	6	7	12	4	4	3	3	9
BOC	19	162	23	130	97	102	55	26	95	58	37	10	94	28	118	87	99	60	78	82	46	88	69	192	229	212	66	90	158	294	534	378	24	206	115	136
BOD1	34	47	101	282	225	262	157	218	284	117	19	25	147	235	262	255	137	47	182	184	517	160	223	121	344	128	427	385	265	255	338	411	737	301	192	296
BOD1L	559	1414	2272	1825	1887	2173	1383	899	1685	1091	1013	194	1436	1301	2168	2919	1847	1088	2323	2089	1701	3948	2397	2120	3309	2916	2411	1591	2683	2999	2229	3265	2872	3396	2725	2294
BOD1P	4	8	7	8	10	9	7	9	4	7	7	5	5	4	4	5	4	6	4	4	8	9	5	6	14	6	7	5	7	11	6	10	8	6	8	10
BOK	4	15	9	17	9	41	16	11	18	12	2	2	4	5	11	22	3	8	24	10	24	14	17	7	18	9	9	4	43	8	15	46	4	12	17	36
BOK-AS	2	1	2	3	2	1	0	0	3	2	1	1	3	3	0	1	1	1	1	2	1	2	4	2	3	0	5	4	6	5	1	3	2	1	0	3
BOLA1	1	6	9	28	10	27	21	17	20	6	2	3	1	19	9	12	22	2	6	7	14	21	25	14	49	9	3	8	12	20	19	25	32	11	9	27
BOLA2	0	0	1	2	2	4	3	0	1	0	0	0	3	4	4	3	2	0	2	1	4	5	0	2	8	4	4	3	2	1	4	8	2	3	2	5
BOLA2B	0	0	1	2	2	4	3	0	1	0	0	0	3	4	4	3	2	0	2	1	4	5	0	2	8	4	4	3	2	1	4	8	2	3	2	5
BOLA3	12	6	53	38	27	50	17	33	49	25	4	5	31	67	62	9	34	15	36	49	111	91	54	30	152	37	54	80	57	72	108	72	161	58	62	167
BOLL	5	4	9	13	8	8	8	7	6	9	9	7	10	5	9	5	11	6	11	12	1	7	4	3	11	7	9	5	5	10	10	7	5	8	3	10
BOP1	4	4	8	20	8	7	4	4	1	5	4	4	3	5	8	6	10	1	4	2	3	4	11	6	6	1	7	5	4	21	13	5	7	11	5	5
BPESC1	9	8	6	7	5	6	8	7	8	7	7	10	3	7	6	3	7	5	4	8	9	11	3	6	7	10	11	9	13	8	13	3	2	7	8	10
BPGM	17	27	762	78	71	177	83	83	182	108	17	12	97	87	99	105	117	26	78	124	171	1561	107	73	182	179	161	130	270	234	129	225	197	208	405	190
BPHL	20	13	27	83	43	40	30	23	37	34	25	3	25	26	46	34	44	19	44	41	123	35	49	27	80	35	77	81	41	42	59	68	47	45	29	98
BPI	14	11	1094	7	29	53	8	18	10	21	8	16	28	33	38	28	37	25	36	51	19	3364	19	60	9	245	5	83	98	4	3	50	8	103	883	16
BPIL1	0	0	1	6	9	4	1	2	2	1	4	2	3	0	2	2	3	0	5	4	1	5	1	2	7	0	14	7	0	1	3	5	1	7	1	5
BPIL2	1	2	2	3	1	3	4	3	1	1	4	2	4	4	2	2	5	1	1	3	4	1	2	3	6	2	2	3	5	0	1	4	3	2	1	4
BPIL3	2	0	0	0	1	1	1	0	0	3	1	0	0	1	0	0	1	0	0	0	1	0	3	1	1	0	3	0	2	0	1	0	0	0	1	0
BPNT1	11	11	27	45	84	78	40	19	74	33	11	5	30	46	71	50	34	34	47	33	24	87	45	58	85	59	82	75	52	79	85	111	99	71	50	51
BPTF	559	1597	2538	2027	2709	2590	1750	1371	2257	1419	1116	188	1656	1798	2694	3663	3688	1583	2576	2384	3060	5356	3225	2615	3242	3917	3201	2912	3479	2201	3258	4713	3858	4054	2958	3357
BPY2	0	0	0	0	0	0	0	0	0	0	0	0	0	0	0	0	0	0	0	0	0	0	0	0	0	0	0	0	0	0	0	0	0	0	0	0
BPY2B	0	0	0	0	0	0	0	0	0	0	0	0	0	0	0	0	0	0	0	0	0	0	0	0	0	0	0	0	0	0	0	0	0	0	0	0
BPY2C	0	0	0	0	0	0	0	0	0	0	0	0	0	0	0	0	0	0	0	0	0	0	0	0	0	0	0	0	0	0	0	0	0	0	0	0
BRAF	51	85	145	121	132	170	128	66	107	92	56	14	107	67	203	225	320	104	182	153	164	319	159	147	384	249	231	184	183	191	183	231	218	283	182	261
BRAP	85	114	493	242	344	412	320	308	429	253	76	46	219	307	464	424	536	90	338	409	494	834	427	270	934	352	483	433	458	347	474	710	611	407	506	627
BRCA1	48	55	410	143	204	145	88	85	129	67	90	18	104	202	162	163	414	64	189	156	325	822	187	186	361	252	304	251	155	200	159	218	587	252	315	212
BRCA2	96	62	476	234	222	208	106	81	238	100	149	34	123	206	129	83	204	112	328	289	307	738	282	140	299	261	337	240	165	229	303	145	925	219	368	152
BRCC3	32	33	97	158	120	128	91	75	184	83	37	11	75	100	170	102	84	43	121	137	258	256	152	115	182	104	186	150	144	156	167	231	259	165	129	164
BRD1	27	56	112	199	160	182	91	54	109	66	19	12	85	129	76	121	122	56	103	98	106	218	112	84	163	135	116	76	126	119	107	176	70	144	110	91
BRD2	207	434	695	1597	807	928	630	444	1007	562	333	81	494	976	826	881	811	283	899	882	1529	1557	1264	651	2262	868	1224	842	992	1216	1244	1508	945	1002	961	1051
BRD3	39	60	204	224	145	213	165	99	270	161	41	20	136	175	164	165	229	67	177	173	229	426	207	150	207	220	211	157	206	202	204	340	347	232	227	254
BRD4	100	191	423	842	314	537	302	220	475	240	175	43	273	495	349	419	924	190	421	441	630	1028	500	299	683	468	507	366	386	454	534	580	928	558	531	474
BRD7	31	41	133	98	160	176	97	68	166	92	23	13	84	171	107	95	103	22	130	138	161	234	114	82	121	89	105	114	177	149	150	224	161	140	148	155
BRD7P3	7	10	19	19	10	22	9	9	8	9	8	5	19	20	7	19	2	12	32	11	6	16	28	18	7	49	8	6	11	23	9	17	23	44	10	16
BRD8	54	190	528	316	437	374	204	169	293	199	128	19	236	352	323	349	352	118	360	288	459	673	353	320	374	452	333	358	356	359	422	513	559	484	288	330
BRD9	23	32	54	80	43	103	31	30	54	33	82	6	26	36	34	31	53	27	45	43	63	62	43	21	123	49	120	65	40	89	66	36	72	63	33	74
BRDT	8	4	7	1	7	7	2	3	3	9	3	3	5	1	6	3	8	2	3	5	5	11	4	4	4	6	6	5	7	7	2	5	1	5	6	10
BRE	39	64	62	179	113	145	66	41	107	69	30	14	67	76	140	113	138	41	121	126	129	147	180	84	107	99	93	90	119	101	192	186	362	108	116	143
BREA2	3	1	5	2	4	2	2	0	3	0	2	0	4	1	2	1	1	2	0	0	2	5	1	3	0	0	2	3	3	0	1	1	1	1	2	0
BRF1	9	19	22	48	29	33	15	9	28	17	4	4	29	33	9	19	30	16	33	19	22	40	20	19	72	22	50	29	31	51	30	37	39	26	25	33
BRF2	3	15	3	57	20	62	49	29	40	14	9	6	36	48	25	43	72	17	33	37	70	65	52	27	126	32	69	62	76	106	61	85	47	44	36	36
BRI3	18	16	109	170	102	237	75	79	178	70	14	10	64	70	129	61	120	11	129	159	142	205	194	75	168	65	94	123	103	180	190	101	191	71	111	145
BRI3BP	5	4	32	16	8	26	17	12	23	6	5	3	14	56	22	9	34	4	21	19	16	81	22	10	60	25	31	15	11	20	16	32	30	32	33	13
BRIP1	42	48	269	136	157	101	62	75	79	41	134	32	120	143	96	56	284	63	179	97	428	484	148	94	237	131	212	158	72	141	118	99	436	143	225	123
BRIX1	10	30	128	246	88	190	112	100	227	104	27	3	80	207	218	212	210	35	128	136	350	289	168	66	367	138	258	153	142	286	214	249	701	160	201	217
BRMS1	5	20	34	39	36	31	24	12	31	15	9	6	12	20	14	17	17	9	33	20	24	38	37	13	38	17	46	20	30	48	32	30	60	15	17	35
BRMS1L	24	26	20	134	49	59	35	36	70	36	21	14	67	75	123	75	79	38	104	90	236	99	107	65	280	65	127	115	107	136	129	209	192	117	104	148
BROX	45	97	218	208	126	229	102	61	215	117	23	7	142	240	267	171	192	122	204	228	167	387	265	161	356	205	234	155	183	243	275	290	339	190	234	269
BRP44	10	34	180	195	123	170	106	178	248	97	17	11	121	301	271	108	233	32	152	123	190	506	257	99	596	155	292	276	301	350	335	372	533	141	362	428
BRP44L	15	38	74	167	142	153	112	131	172	94	7	12	66	63	288	216	134	49	148	180	333	232	233	139	251	123	130	186	240	190	225	348	172	151	209	353
BRPF1	10	43	89	97	51	83	59	34	75	51	35	14	47	61	73	62	110	46	75	86	82	194	80	60	154	67	60	47	45	73	97	94	114	78	90	104
BRPF3	80	110	315	513	565	358	146	148	335	153	54	37	159	227	253	267	300	123	301	253	420	533	422	205	503	255	263	243	278	301	307	394	341	313	331	329
BRS3	3	3	3	3	4	4	0	5	3	5	1	5	0	0	5	6	1	2	2	3	1	2	1	2	3	0	4	1	1	1	4	1	2	1	2	3
BRSK1	10	5	6	14	8	4	8	11	11	8	5	5	2	2	6	7	7	8	15	3	10	19	11	11	14	11	18	5	8	19	8	18	8	4	8	11
BRSK2	3	3	5	6	5	6	10	8	8	7	5	4	4	4	6	7	4	6	4	3	5	6	7	4	7	6	6	7	7	5	13	11	8	14	7	8
BRWD1	182	658	700	881	882	1040	654	362	646	419	370	64	911	927	950	1668	1186	627	1131	1276	960	1788	1077	1164	1911	1792	2138	1410	1190	1718	1109	1581	2176	2116	983	1228
BRWD3	142	294	605	799	723	608	483	343	568	442	168	64	415	462	703	1042	915	305	758	826	1070	1173	950	759	1185	971	902	819	1104	882	1108	1349	1116	1106	810	1181
BSCL2	21	43	68	96	137	104	66	35	87	37	14	11	65	124	79	79	244	28	86	137	76	139	131	44	117	84	171	135	82	96	143	218	158	76	143	159
BSDC1	19	35	222	123	126	150	90	55	126	89	27	18	52	145	78	129	163	22	83	104	157	324	145	70	198	144	101	101	128	136	115	150	173	129	159	108
BSG	31	70	376	255	237	306	132	158	249	110	27	19	158	372	197	132	602	106	235	271	263	1140	375	147	605	211	430	252	214	249	463	301	786	188	384	346
BSN	25	36	44	49	37	40	34	28	34	27	20	25	28	28	32	29	58	20	28	29	22	40	26	30	46	42	44	36	35	42	31	52	30	43	40	37
BSND	4	1	1	1	6	3	3	6	1	3	2	4	1	0	1	2	2	4	1	2	2	1	4	2	5	2	3	3	2	1	1	1	1	5	2	2
BSPH1	0	1	1	0	1	1	0	0	1	0	0	0	1	1	0	0	0	1	2	0	0	0	0	1	2	3	2	0	0	0	0	0	1	0	0	4
BSPRY	0	5	26	5	8	7	4	2	5	2	3	4	5	6	9	6	5	3	7	6	5	23	5	3	6	7	7	2	2	3	11	8	2	8	5	4
BST1	6	16	123	16	30	47	25	13	44	20	3	3	16	12	16	20	25	4	27	59	47	335	29	22	46	54	16	16	19	18	21	38	29	28	174	20
BST2	10	10	49	41	63	114	104	27	95	69	11	6	22	7	66	46	27	7	106	89	79	110	53	27	79	55	52	84	118	99	161	132	126	106	60	52
BSX	1	0	1	1	4	1	0	0	0	0	1	1	1	0	0	0	0	0	1	3	0	1	2	0	0	0	0	1	0	0	1	0	1	2	2	0
BTAF1	127	438	918	291	699	671	278	229	462	268	150	55	636	657	538	1165	495	322	1116	819	463	1178	603	835	674	1323	489	325	745	615	692	799	607	1331	757	588
BTBD1	77	98	225	262	222	519	368	338	707	337	74	31	403	461	672	436	815	83	517	619	814	716	604	291	1238	378	632	620	554	470	597	781	1371	467	506	763
BTBD10	28	60	95	85	142	155	87	121	161	83	16	15	74	133	138	147	78	40	119	163	136	248	166	120	186	118	106	133	213	129	207	253	190	170	154	237
BTBD11	12	9	35	18	24	40	13	15	29	11	10	9	35	127	41	37	30	19	19	37	9	36	33	42	61	27	29	26	47	28	27	60	17	45	42	18
BTBD16	1	3	0	2	8	4	5	2	0	3	2	1	2	2	5	3	0	0	6	8	1	1	0	1	3	4	6	4	3	0	2	5	2	3	4	1
BTBD17	2	2	3	1	3	2	3	4	3	6	2	1	5	6	1	1	1	1	1	5	3	3	6	2	4	6	6	2	3	3	5	3	4	2	1	2
BTBD18	5	7	6	16	20	10	10	8	9	7	7	3	22	20	6	13	12	7	10	11	9	11	17	13	9	27	8	12	8	15	11	12	8	38	14	13
BTBD19	7	19	2	8	11	17	3	4	2	8	4	3	6	3	3	7	5	13	6	11	7	3	5	11	6	8	7	1	8	14	10	6	8	10	13	8
BTBD2	15	5	25	39	16	21	28	28	38	18	6	10	19	55	19	21	60	11	21	26	27	56	25	23	45	29	47	33	33	24	62	64	51	30	29	80
BTBD3	64	249	136	470	660	463	396	383	627	363	82	47	387	588	526	755	1016	251	561	609	679	840	778	722	786	987	424	439	760	915	1032	1330	536	859	963	1021
BTBD6	13	23	72	294	71	115	128	93	183	68	23	12	57	122	136	110	165	12	88	104	372	136	131	96	514	78	120	128	220	222	193	169	145	134	118	160
BTBD7	94	233	333	821	541	454	406	259	475	275	87	57	294	515	527	494	571	210	488	617	714	629	685	474	1017	636	537	473	616	558	553	1131	800	764	611	613
BTBD8	3	6	3	12	8	8	5	2	18	6	2	1	11	11	16	27	19	11	9	8	10	14	5	9	47	26	9	16	20	13	8	15	20	12	12	17
BTBD9	54	101	102	116	180	128	92	61	103	67	27	20	83	64	114	160	165	86	170	139	120	137	158	115	162	158	127	106	161	74	179	166	165	175	115	166
BTC	3	2	5	2	4	3	5	6	3	3	2	2	2	6	9	3	2	2	6	2	1	4	0	0	10	4	4	12	4	3	1	4	3	3	4	6
BTD	8	17	54	114	83	119	98	55	92	61	6	4	46	79	82	154	97	24	80	124	118	114	120	57	167	109	90	72	154	83	106	195	57	134	131	134
BTF3	32	43	188	250	279	245	234	282	361	228	26	26	204	392	453	256	334	71	244	286	281	640	330	181	440	186	600	462	369	388	558	554	365	214	387	472
BTF3L4	38	49	182	159	163	261	202	216	470	206	37	20	174	232	370	345	563	57	266	325	511	542	288	229	799	268	422	395	401	472	508	729	568	352	391	729
BTF3P11	2	0	2	4	2	2	2	3	0	0	1	2	4	0	4	7	2	3	3	1	3	4	1	1	5	0	4	2	0	1	1	4	0	1	0	1
BTG1	74	183	472	511	558	536	392	383	726	404	56	35	378	531	683	1102	751	304	592	730	687	1622	573	553	1198	737	484	727	621	690	642	1101	573	826	845	978
BTG2	78	149	800	212	643	801	436	271	1313	313	53	49	508	708	1797	3658	218	205	764	1213	304	2794	367	372	334	794	111	434	807	336	455	586	261	726	1972	1044
BTG3	28	38	94	175	163	158	59	76	148	58	27	10	99	317	170	117	171	44	127	101	359	192	154	80	804	111	84	108	129	243	143	203	176	104	186	147
BTG4	2	2	1	6	0	2	2	2	4	1	2	1	0	0	2	2	0	1	0	1	1	0	0	0	0	1	0	2	0	0	1	1	1	3	0	2
BTK	17	22	198	23	85	115	36	70	169	63	17	8	27	14	56	51	40	20	129	118	85	469	98	82	94	88	37	68	54	104	79	95	99	109	127	67
BTLA	14	12	16	9	18	22	32	7	33	19	7	4	13	8	36	83	14	16	29	33	13	190	42	106	23	47	8	41	30	59	42	79	6	72	19	33
BTN1A1	7	9	9	9	1	5	3	11	3	5	7	9	2	3	3	13	10	2	4	3	1	3	9	4	9	6	9	5	5	6	2	6	4	9	3	2
BTN2A1	39	50	121	273	176	245	117	67	184	108	37	9	94	97	130	131	102	26	134	156	210	251	199	106	260	149	109	130	164	133	208	218	176	230	133	107
BTN2A2	29	26	45	40	74	134	41	36	65	42	14	23	31	29	75	71	37	22	89	90	91	131	73	59	40	46	49	46	57	70	136	80	69	95	68	40
BTN2A3	2	15	9	25	29	21	18	5	20	11	6	3	19	11	11	26	10	14	29	28	32	20	21	15	25	39	29	8	22	17	9	32	5	24	14	26
BTN3A1	48	75	238	311	372	597	234	219	295	185	43	28	178	95	281	335	126	87	289	291	428	321	439	165	174	318	429	237	404	327	291	388	282	509	241	205
BTN3A2	39	43	59	180	167	247	196	135	305	204	23	11	111	98	257	215	120	56	192	233	696	337	233	126	203	237	374	217	325	188	195	425	215	262	199	180
BTN3A3	14	44	54	126	157	228	98	53	155	62	14	9	97	54	128	169	62	53	131	116	242	144	313	94	77	106	226	156	180	136	142	218	126	189	83	82
BTNL2	2	0	2	6	2	1	1	0	1	5	0	0	0	1	0	1	0	3	2	0	0	0	3	5	2	2	1	0	0	1	1	3	3	5	1	2
BTNL3	3	1	7	2	9	6	3	3	4	7	3	3	3	2	1	5	3	4	4	3	1	7	2	7	4	18	4	2	11	0	12	4	5	5	2	2
BTNL8	1	1	68	1	4	9	1	3	5	5	3	3	6	4	8	6	3	7	6	3	2	44	1	4	3	6	8	7	6	2	2	7	0	27	14	4
BTNL9	6	95	210	83	146	25	330	44	21	122	17	18	90	13	80	368	32	31	104	162	52	133	37	157	19	255	24	37	229	30	23	169	14	334	101	14
BTRC	35	120	507	211	270	293	123	115	260	95	78	30	168	208	201	213	204	95	263	251	150	593	237	218	309	335	282	141	234	251	437	408	285	266	258	238
BUB1	45	19	448	407	226	122	37	80	135	32	81	15	97	240	122	35	367	47	113	122	560	973	168	76	501	126	198	200	70	346	183	80	730	125	355	113
BUB1B	61	41	745	239	283	101	57	127	129	48	183	16	121	376	86	45	422	52	210	87	596	857	147	125	551	227	400	258	93	190	204	86	960	116	422	120
BUB3	41	62	295	386	307	308	203	163	373	153	37	21	165	324	249	215	235	85	413	292	547	633	257	182	554	231	340	314	339	326	359	443	452	339	389	344
BUD13	15	32	103	156	121	91	50	59	105	70	18	10	54	49	72	77	91	32	72	74	78	141	98	45	148	86	126	91	74	88	118	146	105	86	90	88
BUD31	22	43	105	299	148	187	146	111	271	85	31	19	119	93	167	95	150	24	107	131	249	220	133	56	267	90	274	260	192	265	383	254	342	141	188	254
BVES	20	27	19	81	74	270	76	67	156	46	21	9	110	102	181	107	182	28	165	205	379	82	194	67	300	70	65	129	69	97	138	138	163	87	105	175
BYSL	0	8	34	48	52	36	9	13	20	11	5	3	20	55	37	25	26	4	35	14	34	46	24	21	35	26	44	20	15	37	26	40	48	20	26	22
BZRAP1	16	23	35	25	25	16	23	19	15	30	13	13	20	7	24	20	18	16	16	21	19	49	9	15	27	28	15	22	13	29	12	24	15	36	25	17
BZW1	26	34	89	211	147	176	103	99	259	109	23	19	109	166	257	180	123	52	163	231	302	282	212	109	617	120	223	219	192	201	253	300	309	150	234	308
BZW2	19	44	89	421	314	177	121	184	179	84	44	13	160	288	218	101	352	49	183	237	260	325	270	86	389	139	1018	710	182	278	314	219	517	138	275	306
C10orf10	11	61	71	86	92	113	176	69	120	98	6	15	99	17	105	160	62	32	120	169	259	173	102	77	77	187	71	60	943	46	181	254	117	232	181	197
C10orf105	11	8	13	12	15	20	15	16	11	9	8	5	6	7	8	8	6	5	6	8	8	7	11	12	7	12	9	6	13	10	20	19	9	6	13	11
C10orf107	7	5	1	1	7	8	6	10	13	6	2	2	11	5	8	8	15	1	7	10	11	9	8	4	3	3	14	7	5	7	15	24	12	5	22	44
C10orf108	6	53	19	28	47	7	22	21	20	14	8	5	44	15	17	63	12	26	22	33	15	18	22	33	26	50	20	14	57	9	27	19	17	52	10	14
C10orf11	7	22	19	54	33	45	29	25	58	26	5	6	16	5	31	31	10	25	31	50	38	64	43	17	36	37	20	17	39	38	54	53	48	42	36	62
C10orf111	8	7	3	1	8	4	5	3	7	6	8	2	3	4	5	1	5	5	3	7	1	6	1	4	7	5	10	5	6	9	3	6	4	6	2	16
C10orf113	1	3	0	1	2	0	0	0	3	0	0	0	2	1	1	0	2	1	0	0	1	3	0	0	0	2	0	1	4	1	2	0	1	2	1	1
C10orf114	11	4	6	5	9	8	6	9	7	11	5	13	14	4	9	4	14	8	7	10	5	13	7	5	11	7	7	8	8	4	12	21	5	8	14	11
C10orf116	8	8	15	10	5	10	98	24	40	22	2	3	20	3	83	146	9	23	32	42	44	47	15	30	8	25	9	50	162	20	9	52	8	66	59	45
C10orf118	142	317	515	479	427	837	413	336	748	329	146	50	337	383	585	638	464	479	630	694	948	1241	783	427	1033	851	678	587	795	877	1216	1069	474	641	961	913
C10orf119	42	111	303	328	444	424	252	190	461	221	55	31	197	409	433	316	254	93	351	370	453	565	381	256	664	347	387	238	410	423	311	526	433	416	443	512
C10orf12	62	85	297	175	156	168	121	97	145	101	52	24	127	99	168	195	232	98	181	191	208	539	216	138	376	249	128	119	219	156	157	291	181	239	234	184
C10orf120	0	4	0	3	2	2	4	3	2	2	0	0	1	0	2	2	4	0	3	0	0	1	1	4	1	0	1	2	1	5	5	1	1	1	1	3
C10orf122	2	1	1	2	2	5	3	3	0	4	0	2	1	3	1	1	5	1	1	6	1	1	3	0	1	3	2	1	2	1	2	3	2	2	3	4
C10orf125	4	0	1	10	12	6	12	9	9	4	4	1	5	0	3	6	0	2	7	8	1	13	13	0	24	2	12	3	1	4	8	12	6	5	4	9
C10orf128	0	0	2	3	2	8	8	7	1	3	0	0	2	0	4	3	1	2	1	7	1	3	5	6	14	3	1	2	5	4	2	8	5	7	3	5
C10orf129	3	4	8	3	6	5	2	6	4	3	12	1	8	8	4	5	4	4	7	3	1	5	1	5	3	13	3	3	4	6	6	0	1	7	9	3
C10orf131	2	13	6	5	11	7	9	3	2	5	4	2	13	1	6	9	9	18	22	13	2	9	14	10	8	16	5	2	11	8	7	9	9	11	9	12
C10orf136	3	1	5	4	5	9	2	7	0	4	1	3	2	2	9	1	6	3	2	5	12	2	5	6	5	6	7	5	5	5	8	9	7	3	4	7
C10orf137	32	102	160	202	190	184	113	46	142	89	36	15	147	175	143	237	212	94	224	234	143	280	172	178	182	250	214	106	171	173	187	203	189	279	228	153
C10orf140	19	17	14	34	21	24	29	39	19	22	15	19	28	23	28	18	40	18	25	18	31	34	27	22	44	24	38	30	32	45	35	31	19	40	35	43
C10orf18	107	300	394	534	731	774	349	295	607	312	140	52	498	804	575	708	929	276	744	674	728	948	848	478	707	755	1214	531	520	778	886	960	1122	951	544	590
C10orf2	16	25	28	82	41	43	18	28	55	33	10	2	41	96	52	35	41	22	38	60	43	91	45	43	98	31	120	55	40	89	62	72	89	44	34	22
C10orf25	17	21	35	65	20	95	38	26	60	50	4	7	24	17	55	61	61	26	40	50	64	92	53	36	43	58	35	29	51	28	46	53	110	62	52	66
C10orf26	39	69	175	367	325	487	229	205	615	243	33	37	181	185	443	303	225	83	322	341	430	496	367	243	528	271	163	279	424	267	349	643	309	353	310	422
C10orf27	3	0	2	2	3	2	1	2	2	1	1	2	0	3	4	10	2	0	1	3	0	4	2	2	2	2	2	4	2	2	1	5	4	2	0	0
C10orf28	34	87	197	147	184	186	118	113	150	90	41	10	104	127	169	220	114	61	189	199	208	308	157	151	294	192	160	145	198	187	188	222	213	208	177	152
C10orf32	13	18	33	96	98	115	82	65	103	56	8	10	72	91	241	149	47	42	139	185	167	219	100	73	141	104	124	193	235	173	237	246	198	201	172	287
C10orf35	2	4	7	39	3	7	9	8	14	6	4	1	8	39	2	13	20	1	4	6	13	14	7	6	7	1	8	2	12	9	7	5	18	7	11	3
C10orf40	2	2	2	5	6	7	2	1	4	5	3	2	5	0	2	3	5	0	6	5	3	3	1	2	1	2	7	4	4	1	6	5	1	3	4	5
C10orf46	51	132	373	272	451	553	289	233	437	265	52	33	275	420	424	469	371	92	516	516	765	652	537	293	541	441	370	397	504	470	611	626	623	492	469	530
C10orf47	12	51	37	36	58	25	50	26	97	39	9	9	45	25	65	75	44	22	41	36	18	91	74	100	54	158	48	45	102	63	95	376	30	105	171	141
C10orf53	3	1	3	4	0	2	1	4	4	3	1	1	1	0	0	0	3	1	1	3	1	2	3	1	0	1	2	4	2	2	4	2	0	3	1	4
C10orf54	30	38	232	67	53	83	70	60	170	113	13	12	43	15	107	111	56	30	101	117	56	315	88	37	101	80	40	61	172	54	139	110	48	194	229	105
C10orf55	13	7	15	20	11	80	7	11	28	10	15	7	12	3	22	6	22	6	21	29	68	19	23	15	55	12	13	22	10	20	22	21	10	13	18	19
C10orf57	15	23	78	100	88	154	73	80	139	58	7	10	63	199	61	112	115	35	99	133	144	179	180	75	23	91	58	69	119	125	105	138	116	88	131	169
C10orf58	17	19	46	131	70	106	254	84	193	160	11	6	80	363	175	395	88	19	179	240	209	151	96	73	130	72	62	68	599	91	104	282	134	173	113	125
C10orf62	1	4	2	1	1	1	6	3	3	1	2	1	3	2	2	1	1	0	3	1	1	3	1	1	2	1	1	3	2	4	2	0	2	1	4	1
C10orf67	3	7	8	3	4	10	6	4	4	4	6	5	6	5	5	3	7	5	4	5	4	4	8	5	5	3	4	3	5	2	10	2	2	3	5	8
C10orf68	31	70	31	50	30	60	75	40	49	56	5	12	69	83	109	145	39	70	48	57	66	121	43	56	63	136	128	133	147	83	224	153	35	130	69	181
C10orf71	19	16	19	51	23	35	17	16	19	25	19	16	163	22	149	46	52	11	27	19	8	32	17	21	18	17	30	142	22	9	18	18	11	21	9	19
C10orf72	40	85	69	311	94	223	214	143	266	115	20	21	115	36	234	228	585	98	203	179	301	161	339	183	362	183	210	196	419	113	244	549	769	411	149	281
C10orf76	37	89	168	116	227	245	135	89	203	80	33	23	117	132	169	215	191	96	189	197	200	281	215	149	240	156	180	120	172	190	299	244	250	283	184	221
C10orf78	6	8	31	47	23	50	22	29	47	34	3	5	34	34	62	54	32	14	27	56	49	93	37	25	103	62	34	41	61	59	64	110	31	38	58	72
C10orf79	10	13	20	9	4	10	8	8	19	10	10	9	20	8	29	48	14	9	13	10	9	18	6	12	34	26	16	9	9	21	48	26	14	41	4	11
C10orf81	11	5	5	10	15	14	15	7	8	19	5	6	9	7	7	8	14	11	12	15	96	19	18	16	27	9	13	10	11	5	8	8	16	6	13	6
C10orf82	0	2	4	2	1	1	1	1	1	0	0	1	1	1	3	2	3	2	1	2	2	0	2	1	3	0	5	0	0	3	1	2	0	4	1	4
C10orf84	40	75	156	116	169	235	196	162	288	149	42	16	143	166	261	168	90	82	220	279	315	345	208	130	325	156	232	268	247	305	293	329	184	167	220	452
C10orf88	36	40	86	68	81	67	45	53	60	31	23	18	72	52	91	69	79	34	107	118	105	108	112	53	110	76	104	59	71	116	102	141	123	75	111	79
C10orf90	9	5	14	2	2	10	1	4	12	9	8	2	37	242	6	7	7	5	7	8	5	16	12	12	10	3	10	8	4	7	10	10	2	11	2	4
C10orf91	0	1	1	1	0	0	0	2	2	2	0	1	1	2	1	0	1	0	0	0	0	2	1	5	2	3	4	1	0	2	2	2	3	0	2	1
C10orf93	1	1	0	5	3	1	2	3	2	4	2	1	2	1	2	2	0	1	0	0	0	3	3	4	2	3	4	4	4	4	2	2	2	1	1	2
C10orf95	4	1	1	3	2	5	3	2	3	4	3	2	3	0	4	3	4	3	3	3	3	5	3	2	7	2	11	5	4	6	1	3	5	11	4	0
C10orf96	6	3	3	1	6	1	2	2	3	1	0	1	0	1	6	2	2	2	4	3	1	7	4	2	1	5	4	2	2	7	4	0	1	4	5	7
C10orf99	1	0	2	1	2	1	2	1	0	1	1	1	3	2	1	0	0	0	2	1	0	1	1	1	1	0	1	2	0	1	1	1	2	1	1	2
C11orf1	4	2	21	29	27	61	28	30	51	22	10	3	20	64	37	34	49	13	31	53	76	64	30	22	65	31	78	74	38	31	83	60	123	45	36	76
C11orf10	11	34	115	222	161	252	101	168	222	83	15	8	100	217	169	80	139	48	119	159	202	249	178	50	261	74	276	262	169	180	363	188	214	86	176	324
C11orf16	3	1	2	2	2	4	5	3	3	1	4	0	0	2	1	1	2	3	2	2	3	3	4	5	2	4	3	4	2	1	5	4	5	4	4	3
C11orf17	3	3	14	30	43	69	18	21	55	27	3	9	17	32	33	9	20	13	33	28	88	34	27	17	41	6	22	25	51	44	53	50	89	30	33	64
C11orf2	8	10	24	41	31	36	39	31	55	22	5	5	18	31	61	43	38	10	28	50	38	78	35	21	52	25	55	47	48	21	68	77	37	32	39	57
C11orf20	1	3	0	2	1	2	0	2	1	2	2	0	0	0	2	2	1	2	1	4	6	2	3	0	5	0	2	0	4	1	1	0	1	4	2	2
C11orf21	8	14	85	3	13	12	10	6	7	10	5	2	9	0	6	12	8	3	6	12	0	92	7	9	6	22	2	17	14	6	24	7	5	23	26	8
C11orf24	36	83	51	564	186	565	114	230	501	114	65	21	148	276	179	117	637	75	288	393	542	211	675	138	454	200	350	327	204	261	529	401	851	175	369	475
C11orf30	66	177	288	336	311	271	238	168	260	160	220	31	165	198	250	353	400	141	310	287	313	528	344	302	478	497	324	222	258	247	279	426	430	404	244	303
C11orf31	16	22	80	158	121	204	108	129	233	103	28	14	73	183	143	89	85	28	127	149	185	190	135	58	215	80	194	200	183	254	291	175	250	122	117	248
C11orf34	3	13	13	1	17	8	10	6	5	8	6	2	10	2	6	29	5	1	10	8	2	8	7	33	1	26	14	9	12	5	16	9	3	39	10	9
C11orf35	1	1	0	3	3	1	3	7	1	7	3	4	6	1	6	1	4	1	0	7	3	5	1	3	4	2	6	1	6	3	8	6	0	8	3	1
C11orf36	3	1	4	3	1	1	3	2	0	5	2	5	2	3	2	2	4	1	4	5	4	4	3	8	1	1	9	5	2	4	4	8	1	0	5	2
C11orf40	0	1	0	2	0	0	0	1	0	1	1	0	0	1	0	2	0	0	0	0	0	1	1	2	0	1	3	1	0	1	2	0	0	0	1	1
C11orf41	34	42	22	123	69	455	34	132	134	36	49	17	189	1117	69	38	173	68	243	178	403	66	257	92	178	26	102	46	38	55	256	169	546	93	139	115
C11orf42	6	2	3	4	1	4	3	4	3	2	1	4	6	1	2	0	3	1	3	5	2	3	1	3	6	5	2	3	6	4	4	8	3	2	2	2
C11orf45	18	13	11	29	31	88	20	25	46	16	12	8	24	10	18	16	25	9	49	42	45	25	47	21	38	10	34	25	26	38	73	35	50	41	16	19
C11orf46	22	38	90	162	199	286	186	139	265	119	24	14	101	225	188	197	150	44	242	204	322	396	233	151	237	177	171	249	288	226	399	373	413	263	258	431
C11orf48	37	56	92	262	98	117	65	98	201	75	56	16	84	129	165	67	133	34	109	126	161	170	157	56	164	73	178	152	144	200	228	173	227	128	118	209
C11orf49	11	13	10	38	50	34	29	12	44	17	4	12	29	47	29	30	28	14	20	30	56	33	46	28	51	43	30	39	52	32	33	53	51	36	30	41
C11orf51	22	13	114	93	66	104	40	58	102	47	8	3	33	52	81	25	41	9	37	65	97	195	61	29	94	33	78	63	56	67	82	94	92	47	66	103
C11orf52	1	0	2	1	1	4	5	3	6	4	2	2	4	0	3	1	0	6	1	7	2	4	2	6	1	9	5	2	9	2	3	10	1	4	9	1
C11orf53	3	5	1	2	2	2	4	6	3	1	2	1	3	3	1	2	1	2	0	3	1	1	1	2	2	0	2	3	3	1	0	3	4	4	1	1
C11orf54	20	44	81	201	105	131	94	57	172	68	26	10	64	95	124	132	70	29	90	121	81	166	125	77	167	158	153	131	177	157	131	235	177	128	144	149
C11orf57	43	68	179	296	288	252	191	190	305	151	67	44	184	239	309	246	276	101	228	227	436	522	368	214	496	295	553	354	310	356	401	549	611	309	312	392
C11orf58	46	108	233	465	363	399	248	293	463	258	47	29	285	307	620	409	354	146	329	424	557	613	467	363	490	384	448	544	607	580	785	758	920	383	444	701
C11orf59	27	19	125	187	98	204	105	103	157	86	17	17	62	114	158	84	58	39	127	145	150	258	183	63	170	74	93	109	113	165	190	177	182	98	122	159
C11orf61	33	50	35	73	132	102	63	50	84	60	51	9	62	55	57	88	83	53	85	104	73	79	93	111	132	140	97	93	85	94	107	119	119	118	63	89
C11orf63	33	76	47	96	103	109	132	135	135	78	53	27	44	47	98	168	128	89	138	90	105	122	155	134	126	125	112	113	230	160	153	231	179	127	126	221
C11orf64	2	0	1	2	0	2	1	2	0	1	1	0	2	0	0	1	1	1	0	2	0	2	0	0	0	0	2	1	3	0	2	0	1	2	0	1
C11orf65	2	5	4	7	3	2	2	5	1	2	2	3	2	8	2	3	1	2	9	0	2	7	8	1	10	4	12	4	11	0	3	0	10	9	2	8
C11orf66	0	2	5	0	4	4	4	3	1	2	0	1	2	0	6	8	4	2	2	4	1	6	4	2	3	7	1	4	1	4	3	1	1	8	2	3
C11orf67	9	15	39	137	73	128	97	88	145	55	11	8	60	36	113	126	54	12	42	58	118	87	87	75	177	61	125	119	257	116	163	259	191	119	139	214
C11orf68	8	12	22	50	21	61	28	29	38	23	10	1	8	28	32	20	49	11	28	33	50	78	52	23	67	27	29	30	35	32	37	51	41	40	35	38
C11orf70	6	6	7	18	17	16	9	16	18	21	3	3	7	7	30	42	41	9	21	23	23	15	28	18	33	23	31	18	7	22	22	47	41	22	21	46
C11orf71	1	1	11	16	7	9	9	10	8	7	2	2	7	15	10	15	5	9	10	13	8	17	18	6	25	13	12	20	12	7	8	12	15	12	10	21
C11orf73	4	10	40	61	67	93	47	58	91	43	4	4	36	63	71	40	32	16	58	82	157	112	93	30	130	55	96	65	64	74	125	85	168	65	83	162
C11orf74	15	29	47	100	124	123	74	100	150	75	17	16	65	43	149	91	80	27	100	80	181	153	88	58	203	95	90	122	168	201	245	197	179	111	171	267
C11orf75	9	14	32	40	45	165	12	41	90	47	8	3	43	9	43	21	42	18	56	70	112	58	85	40	99	16	65	85	69	90	213	101	129	34	54	165
C11orf80	10	10	31	14	30	24	12	9	8	7	17	4	17	41	9	26	16	15	9	15	16	32	9	23	35	31	33	10	14	27	15	10	17	20	15	14
C11orf82	19	7	93	65	55	47	11	14	42	21	13	6	26	102	27	18	65	11	74	47	213	188	51	30	104	60	49	31	31	51	60	24	208	40	121	65
C11orf83	5	5	22	22	10	12	9	13	20	10	5	4	9	10	16	22	8	10	18	10	15	25	8	13	24	14	23	12	0	14	23	21	16	11	17	9
C11orf84	6	19	16	59	45	27	10	21	29	6	14	5	19	38	20	13	63	14	26	32	27	31	17	14	68	24	29	36	24	38	61	42	64	30	23	39
C11orf85	1	1	1	0	2	2	0	0	0	0	0	1	1	0	1	0	1	1	2	2	2	2	2	0	1	0	1	2	1	1	1	1	0	2	1	1
C11orf86	0	2	3	2	1	4	2	1	2	1	1	0	1	1	3	1	3	0	1	1	1	4	2	0	2	2	6	3	1	3	3	7	2	1	3	2
C11orf87	21	18	26	22	15	23	26	30	34	18	15	11	13	10	24	22	30	6	27	22	20	38	19	49	47	45	27	18	49	26	43	78	24	70	56	25
C11orf88	2	1	0	0	1	0	0	2	0	1	1	0	1	0	0	1	0	1	3	1	0	3	0	0	1	0	1	0	4	0	3	0	1	0	3	2
C11orf9	10	9	24	41	53	14	23	10	14	13	29	7	13	7	14	10	18	10	10	10	12	8	10	7	33	6	23	10	18	34	27	7	20	13	11	11
C11orf90	2	0	0	2	0	1	1	1	1	0	2	0	1	0	0	0	0	0	1	1	3	1	0	4	1	4	2	0	1	0	2	0	0	2	1	0
C11orf91	0	5	2	3	3	4	1	4	1	1	3	1	4	2	2	3	3	2	2	3	0	4	3	2	4	0	3	1	3	6	10	1	4	5	5	2
C11orf92	16	15	16	22	13	14	17	18	18	24	14	22	167	1467	47	44	57	30	42	55	38	78	35	46	26	24	29	22	19	18	17	20	87	24	21	17
C11orf93	3	5	5	25	10	4	7	2	6	3	7	0	13	96	8	2	30	5	1	2	6	12	7	14	17	12	10	6	17	2	7	20	39	21	6	3
C11orf94	0	0	1	2	2	0	0	0	1	1	0	2	0	0	0	3	0	1	0	0	0	1	1	0	1	0	1	1	0	0	1	0	0	1	0	1
C11orf95	28	86	82	137	227	186	151	110	185	111	28	21	132	89	183	162	298	74	203	176	114	160	141	111	191	93	185	151	147	111	296	255	177	195	163	189
C11orf96	5	11	12	48	42	39	29	18	70	34	11	3	21	7	73	79	4	18	30	42	13	21	8	15	52	25	18	18	22	12	33	39	11	18	43	107
C12orf10	12	8	37	60	48	55	28	36	54	27	10	2	19	28	59	32	66	10	41	54	77	83	64	21	70	40	36	61	50	42	49	88	141	30	39	64
C12orf11	18	56	99	80	75	132	47	83	128	47	53	10	112	121	133	88	121	44	132	188	157	191	172	101	532	123	468	156	100	217	211	164	217	131	148	206
C12orf12	8	5	4	5	14	6	4	6	5	6	7	6	7	5	13	5	6	2	5	8	4	11	5	10	6	4	12	13	5	7	4	4	6	9	5	8
C12orf23	121	251	240	1280	1024	1424	525	923	1509	458	96	88	713	1489	805	640	1590	347	1044	1036	1624	1433	1973	590	3023	1353	2500	1911	1419	2469	2777	2144	2835	1014	2691	3806
C12orf24	15	8	31	54	40	34	24	35	61	14	17	4	24	43	33	17	56	11	32	35	55	81	36	31	115	46	86	77	39	47	87	47	87	45	61	55
C12orf26	7	29	68	56	49	101	68	68	117	39	11	10	44	54	145	135	117	45	106	110	90	165	101	75	174	102	143	164	175	117	221	228	95	149	108	227
C12orf29	15	22	86	76	60	83	61	74	126	107	34	8	71	108	148	158	89	35	87	99	177	236	118	98	196	139	147	165	157	107	162	201	204	135	162	200
C12orf32	16	17	100	49	61	73	46	35	87	36	10	7	34	136	106	63	62	33	60	95	178	174	82	56	260	73	105	98	60	87	90	92	148	50	86	91
C12orf33	3	10	9	5	19	9	9	7	8	13	5	6	14	4	17	28	6	19	25	16	5	13	12	16	11	16	7	4	15	9	9	14	7	41	2	2
C12orf34	12	7	4	4	9	10	13	4	10	10	1	5	12	2	5	13	18	6	6	4	11	9	6	8	16	13	7	10	5	14	12	16	11	18	11	13
C12orf35	316	730	2070	576	1094	1998	1656	841	1933	1293	297	126	985	629	1700	2603	758	1000	2367	2328	1851	3761	1871	1454	1881	2650	1085	1249	2419	1999	2384	2694	1524	2674	2367	1621
C12orf36	5	1	8	4	6	3	8	11	5	10	9	6	3	5	5	9	6	4	2	6	5	5	3	5	36	8	7	4	6	6	7	4	6	4	9	8
C12orf39	0	0	3	4	3	0	1	2	0	0	1	0	1	0	0	0	2	0	1	1	0	7	0	2	1	1	1	2	7	1	5	4	0	0	2	4
C12orf4	48	115	184	136	264	423	235	250	410	203	49	17	246	474	430	282	324	166	421	540	424	566	477	276	972	341	487	337	384	421	550	583	425	335	420	457
C12orf40	6	6	3	3	5	11	4	4	6	2	5	3	4	7	7	6	5	3	5	7	3	4	1	6	9	4	5	6	2	3	5	12	6	7	3	4
C12orf41	29	83	140	113	210	223	116	111	184	118	43	17	108	220	173	178	191	100	142	156	254	282	201	135	336	244	163	186	173	177	221	239	268	229	169	209
C12orf42	2	1	4	3	0	2	5	4	1	2	4	1	2	0	3	4	2	1	2	4	1	10	2	4	2	5	5	2	4	4	1	5	1	4	4	3
C12orf43	9	19	17	33	19	38	15	27	27	21	19	5	7	18	29	22	29	5	25	16	45	42	31	17	49	14	25	19	33	32	26	38	34	31	29	34
C12orf44	12	17	27	59	67	106	42	30	86	56	10	10	58	45	29	44	53	12	38	64	89	43	54	38	87	20	58	47	25	31	72	64	88	22	25	71
C12orf45	2	7	21	39	26	39	19	43	71	28	8	0	11	37	35	27	16	12	43	45	126	66	55	16	156	29	92	58	51	91	120	71	76	43	74	141
C12orf47	26	35	97	195	169	158	125	138	189	90	23	11	66	103	148	106	97	22	90	112	195	201	114	110	344	117	151	135	137	107	219	208	198	127	107	227
C12orf48	12	13	135	39	58	39	21	26	29	18	19	5	39	72	37	24	81	14	75	41	215	260	55	39	154	116	93	58	46	97	81	29	239	50	109	75
C12orf49	18	53	62	110	149	125	93	101	171	86	24	9	65	108	184	99	150	36	143	149	117	235	194	117	271	119	162	108	153	169	141	277	239	136	119	232
C12orf5	33	35	37	78	111	154	72	74	169	79	19	13	84	105	94	56	121	28	141	132	192	117	207	63	227	74	109	94	116	175	249	181	130	71	89	80
C12orf50	3	2	1	2	0	2	2	1	2	5	2	1	2	3	1	3	4	1	2	1	3	5	0	2	0	1	3	3	3	2	1	4	1	2	1	1
C12orf51	101	489	1827	394	731	612	394	236	423	332	190	64	499	312	422	700	626	281	600	515	383	2322	562	753	923	1475	365	415	577	551	444	841	495	1087	839	480
C12orf52	2	10	16	24	41	27	25	18	31	18	10	6	23	24	22	19	40	16	22	29	48	71	30	10	64	14	27	37	12	36	32	33	41	21	29	47
C12orf53	3	1	8	4	8	3	6	6	1	5	3	4	2	3	8	7	13	10	6	4	1	10	4	11	9	8	16	9	16	7	4	9	26	2	4	18
C12orf54	1	1	4	1	1	3	4	4	0	1	3	4	0	2	2	0	2	5	3	3	4	1	1	0	1	2	1	4	2	2	3	0	0	2	1	2
C12orf56	3	2	3	3	1	7	3	2	5	3	4	2	4	16	6	0	3	2	4	8	3	5	4	5	4	11	7	1	13	15	1	8	4	2	7	5
C12orf57	11	7	11	30	26	59	27	54	54	26	2	8	17	28	38	38	16	8	27	35	58	69	33	16	186	25	92	110	44	71	74	76	36	23	47	136
C12orf59	9	4	36	8	4	51	9	8	6	2	4	7	6	6	17	5	12	3	6	11	45	65	10	7	14	12	5	19	9	36	12	9	17	11	42	7
C12orf60	3	4	25	4	7	3	4	13	3	5	3	3	2	3	1	0	7	0	6	2	7	22	6	5	12	9	12	11	10	13	17	19	3	8	5	6
C12orf61	8	6	5	6	8	5	4	10	6	8	3	0	6	5	8	6	5	6	7	3	4	5	7	7	8	12	4	1	8	3	5	8	6	12	17	6
C12orf62	12	8	50	81	84	99	96	74	105	52	6	5	51	57	107	73	54	13	71	96	176	91	67	39	80	20	72	116	85	91	120	107	100	46	67	155
C12orf64	12	11	15	14	16	22	12	15	10	20	6	10	15	9	8	13	18	10	11	16	18	19	23	15	14	10	26	10	18	11	27	19	6	13	13	8
C12orf65	22	12	31	39	39	44	26	41	48	34	12	3	50	78	46	21	44	18	42	48	74	109	66	37	196	37	38	57	52	66	77	74	104	57	58	55
C12orf66	4	13	15	30	26	37	14	7	26	11	5	7	17	18	26	19	31	12	22	9	20	41	30	6	46	12	38	22	17	24	54	30	46	31	10	22
C12orf67	4	6	4	2	3	3	2	4	3	3	5	1	3	2	3	4	2	3	8	11	6	4	5	3	6	3	6	2	10	4	4	4	5	2	7	2
C12orf68	3	9	5	7	11	5	8	5	18	9	1	6	6	20	15	17	11	6	7	7	3	10	9	5	21	16	10	9	5	5	18	16	7	14	6	9
C12orf69	7	1	17	5	5	12	11	9	7	12	3	6	8	7	3	6	10	3	12	6	10	20	12	10	10	7	7	7	7	11	6	14	11	12	7	9
C12orf70	0	8	2	1	8	21	2	4	2	4	1	1	2	0	3	0	3	1	9	7	2	2	3	4	43	0	6	1	1	16	2	2	2	5	3	4
C12orf71	1	3	8	3	1	2	1	1	0	5	0	3	1	3	3	6	2	2	5	4	1	7	1	2	1	2	1	5	1	5	2	3	3	3	3	1
C12orf72	3	5	7	13	19	26	22	18	22	15	1	6	21	10	33	27	19	8	27	37	16	33	43	8	23	16	25	14	36	8	29	67	13	32	23	22
C12orf73	11	13	24	23	39	25	13	23	32	8	6	2	24	32	35	56	22	9	20	47	43	39	25	41	77	22	49	30	28	41	43	34	61	28	35	40
C12orf74	3	5	6	6	7	3	5	9	5	5	5	2	2	1	3	7	3	11	3	3	1	4	3	2	6	6	4	5	5	4	6	3	5	5	3	4
C12orf75	35	21	45	31	46	388	70	97	244	71	25	17	50	53	80	65	72	17	98	156	382	90	168	35	210	33	80	71	98	163	200	80	126	75	67	146
C12orf76	7	11	51	40	57	67	42	39	60	49	8	5	31	38	56	70	43	17	51	90	61	104	59	57	72	76	62	47	97	80	79	96	80	89	73	86
C12orf77	3	2	1	2	2	2	3	3	3	4	0	2	2	2	3	2	1	7	4	3	7	4	0	2	5	2	2	2	3	3	2	3	0	0	0	1
C13orf1	16	28	39	80	82	131	62	87	144	73	14	11	68	111	128	70	62	27	83	74	102	92	136	65	174	94	109	88	104	110	134	215	174	83	120	204
C13orf15	39	105	246	199	179	129	180	108	159	256	25	13	45	23	152	222	93	81	246	266	77	344	127	92	393	217	144	175	148	202	124	132	72	136	226	217
C13orf16	5	4	1	7	2	28	1	0	3	0	1	0	5	1	1	1	4	4	11	3	81	6	5	5	24	0	10	3	0	0	1	1	2	2	1	0
C13orf18	25	28	72	70	89	224	44	60	130	43	10	9	47	30	100	168	79	20	208	173	97	915	147	164	98	164	46	81	87	101	115	83	111	142	108	75
C13orf23	63	160	368	223	323	461	274	254	499	246	80	33	281	269	324	392	446	115	492	442	549	923	603	344	546	431	504	304	511	441	426	650	692	494	551	402
C13orf26	0	0	0	0	1	1	4	0	2	2	2	1	3	0	4	0	4	1	1	0	0	2	2	1	1	2	3	0	2	0	1	5	1	1	0	1
C13orf27	5	11	16	36	19	37	8	29	34	14	4	4	15	29	41	22	16	8	34	36	114	71	49	28	68	28	48	39	29	100	52	48	99	32	40	52
C13orf28	0	0	0	0	2	1	1	3	1	0	0	1	0	0	0	0	0	0	0	5	0	2	0	0	2	0	0	1	0	0	0	0	1	0	1	1
C13orf29	11	17	22	41	32	82	25	27	34	29	14	14	31	24	65	21	45	12	43	48	221	27	61	19	53	25	23	54	32	33	36	36	48	28	15	18
C13orf30	1	3	8	9	13	14	7	5	5	9	5	5	9	4	8	6	5	5	24	6	4	10	11	6	11	7	12	9	5	6	11	10	23	9	4	7
C13orf31	38	54	73	195	193	361	122	130	287	141	37	23	76	88	229	145	120	40	290	473	128	216	331	124	284	138	186	156	234	278	471	361	300	190	163	234
C13orf33	10	8	12	24	69	143	16	16	103	26	11	5	53	8	111	53	40	16	37	71	111	26	47	16	121	20	17	35	41	42	39	29	10	35	34	8
C13orf34	26	29	185	65	78	93	51	54	91	55	42	7	59	84	60	86	89	31	106	104	78	272	131	76	104	156	80	103	77	94	132	113	245	100	155	78
C13orf35	4	7	5	7	6	5	9	2	3	8	3	1	3	1	2	2	3	5	3	3	2	4	4	2	2	2	1	2	9	6	5	3	2	1	6	4
C13orf36	7	7	7	4	4	12	9	12	7	7	7	4	4	2	5	4	10	3	8	16	4	13	6	8	7	5	9	12	6	3	9	12	6	9	7	12
C13orf38	2	0	5	5	4	3	3	2	15	1	1	5	7	4	6	4	6	3	9	2	2	7	5	2	6	1	30	20	5	5	6	7	32	10	9	15
C13orf38-SOHLH2	4	8	8	5	10	20	1	4	20	13	4	5	24	4	17	12	27	12	32	8	5	14	11	20	22	16	38	31	8	7	19	46	86	25	22	34
C13orf39	2	2	3	5	1	4	1	3	1	1	1	4	2	1	2	2	4	0	1	3	3	3	2	1	0	4	2	0	0	5	0	5	3	2	0	2
C13orf40	63	46	59	62	69	66	53	54	42	65	125	55	44	38	51	42	38	45	54	65	42	81	59	56	100	68	55	43	53	87	65	63	60	73	53	61
C14orf1	15	18	84	223	86	143	79	72	132	71	14	11	72	297	125	109	144	41	110	92	345	203	160	78	564	75	180	113	96	107	220	189	161	89	136	136
C14orf101	32	70	146	161	113	202	91	74	119	83	25	11	85	195	127	138	278	65	182	153	140	198	201	172	308	220	135	109	141	154	174	231	238	159	142	149
C14orf102	13	38	66	121	56	59	29	18	40	31	45	8	48	61	42	64	47	38	44	58	25	70	64	36	86	66	73	45	60	68	64	81	86	100	38	55
C14orf104	16	19	33	121	70	78	53	48	78	32	24	5	29	76	95	65	68	16	69	57	111	75	78	27	140	31	101	55	56	78	93	96	93	54	95	122
C14orf105	1	3	7	2	3	4	3	5	4	9	4	3	2	4	5	4	1	5	4	5	13	4	2	12	6	9	7	7	6	2	6	7	3	7	3	5
C14orf106	112	213	1038	683	511	416	338	256	385	217	378	45	319	495	457	653	317	253	581	539	675	2177	525	597	888	1066	489	412	751	497	467	997	1097	811	898	501
C14orf109	3	8	35	55	97	97	28	51	104	49	10	1	42	111	107	44	32	8	30	62	90	81	71	49	126	28	46	55	85	152	105	123	132	51	46	128
C14orf118	26	89	146	379	345	244	134	70	176	99	68	12	99	114	151	211	250	67	206	199	186	295	239	184	260	212	309	167	171	214	244	259	357	249	198	251
C14orf119	60	68	352	545	320	528	241	288	609	250	53	48	197	348	366	212	461	75	329	425	776	717	535	178	747	203	457	414	330	569	514	484	787	343	486	545
C14orf126	13	16	42	145	24	58	39	32	62	32	7	11	33	153	49	73	66	25	60	80	72	116	65	42	68	53	152	94	93	87	124	74	151	62	63	106
C14orf128	9	2	8	34	12	7	16	5	12	7	3	2	12	11	8	19	31	5	13	13	23	5	19	16	24	9	14	17	8	8	20	29	28	30	15	17
C14orf129	22	19	90	100	109	156	78	82	143	80	8	14	59	116	118	96	107	30	99	152	429	239	124	95	254	87	95	72	124	135	138	140	182	101	156	224
C14orf132	28	59	30	464	251	131	100	109	162	62	34	22	65	68	191	115	272	55	104	153	429	131	260	145	179	183	159	191	188	142	155	459	460	240	174	257
C14orf135	42	170	224	536	295	388	147	160	253	119	62	26	338	621	339	346	543	218	491	354	559	587	513	380	1071	452	373	363	385	502	475	528	692	512	368	466
C14orf138	11	13	67	44	38	50	23	21	21	21	16	5	22	27	21	50	21	14	42	30	46	75	46	28	78	67	38	35	32	52	56	60	50	59	55	35
C14orf139	25	62	196	199	345	103	191	99	171	150	39	29	115	29	191	186	157	43	151	182	124	483	165	136	191	187	75	105	230	88	122	260	95	232	191	155
C14orf142	3	2	24	62	22	37	27	26	47	15	6	6	15	65	40	24	14	11	24	35	70	46	35	24	134	17	38	47	25	97	29	60	80	28	32	84
C14orf143	1	7	31	45	9	19	21	7	18	15	10	1	9	23	14	16	34	5	15	26	42	39	25	15	35	10	33	20	38	42	34	39	56	22	50	29
C14orf145	131	97	399	392	403	399	137	93	148	94	387	27	119	105	149	231	202	92	267	131	270	462	154	150	315	302	254	183	252	239	193	230	309	305	287	165
C14orf147	27	32	115	442	132	318	186	127	273	141	31	20	205	1745	285	146	284	66	199	291	602	321	278	141	702	118	284	278	222	337	477	248	436	169	187	379
C14orf148	3	10	4	14	12	1	5	2	5	2	3	3	9	12	7	9	3	0	5	10	7	17	8	12	6	11	15	6	7	8	8	12	16	17	3	7
C14orf149	13	21	19	55	72	79	44	38	70	29	27	9	56	152	86	75	35	29	77	94	83	30	88	50	81	54	63	77	41	45	62	71	125	73	69	50
C14orf153	10	9	11	79	26	52	32	32	50	16	8	4	24	21	25	23	33	24	29	48	75	36	60	24	142	14	68	62	40	62	65	61	66	31	49	82
C14orf156	14	12	40	162	106	91	54	123	165	69	18	12	54	113	132	37	57	17	75	81	381	131	104	50	240	60	203	166	133	209	257	184	207	68	135	318
C14orf159	23	41	76	94	130	76	75	43	108	48	24	9	64	48	72	69	60	19	95	73	52	102	103	63	51	93	68	63	71	92	62	77	146	110	58	68
C14orf162	2	3	1	2	1	0	2	2	3	4	2	3	1	2	3	3	2	0	3	4	4	4	6	4	1	3	1	4	3	1	9	4	2	4	1	7
C14orf165	2	3	1	2	4	2	2	7	4	2	4	4	0	1	1	0	1	2	4	3	3	0	2	1	2	0	1	5	4	6	5	1	3	7	0	2
C14orf166	16	41	139	197	190	322	200	151	319	165	23	15	120	173	247	146	166	64	226	224	494	340	235	107	445	84	257	233	203	328	421	293	353	155	256	262
C14orf166B	1	0	3	5	3	4	0	3	1	1	0	1	2	2	0	5	1	2	2	3	1	5	2	2	3	0	1	3	3	1	2	0	2	2	0	2
C14orf167	21	21	65	138	85	136	104	78	128	71	31	10	68	146	133	144	167	42	142	118	250	176	128	80	221	120	154	169	169	158	218	200	139	126	139	221
C14orf169	9	8	20	53	40	31	16	24	29	27	15	6	28	47	33	22	47	8	33	40	48	68	43	11	47	20	33	40	33	36	54	51	61	44	37	29
C14orf176	1	4	5	4	4	3	0	2	2	4	1	0	1	6	1	0	4	1	3	1	4	6	4	3	16	6	10	0	4	2	7	4	5	7	2	3
C14orf177	1	2	2	1	2	1	1	2	3	4	2	1	1	1	2	3	3	3	2	2	1	3	1	0	4	0	3	4	4	1	4	1	2	1	1	0
C14orf178	0	0	1	2	2	0	3	0	0	0	1	0	1	0	1	1	2	1	2	0	0	1	1	3	1	1	0	0	1	0	0	0	0	2	1	2
C14orf179	5	21	6	82	59	77	22	44	55	41	7	5	18	63	46	28	29	17	32	63	62	24	61	32	70	27	54	38	33	47	74	34	60	35	29	80
C14orf180	2	0	9	6	5	4	2	10	2	6	5	6	2	1	11	24	4	6	7	3	1	12	2	0	4	8	4	4	19	9	7	11	6	6	9	3
C14orf181	10	9	23	20	14	15	11	6	28	13	11	7	9	9	29	7	12	21	16	23	9	33	13	9	27	16	11	9	25	8	18	14	7	14	25	46
C14orf182	5	4	11	12	10	8	2	6	7	6	12	5	5	7	3	16	5	5	9	6	6	11	6	7	28	9	5	12	4	11	3	6	8	6	6	8
C14orf183	1	1	1	2	3	2	2	2	0	1	0	0	2	0	1	1	0	4	0	1	2	3	0	4	3	1	2	0	3	0	1	1	0	0	1	1
C14orf184	7	6	3	8	5	7	7	6	2	3	5	4	7	7	3	5	8	6	2	5	3	9	4	4	8	8	5	7	9	4	5	11	11	9	4	8
C14orf19	4	0	4	6	5	7	8	1	4	6	0	1	5	6	5	4	0	0	4	4	18	19	4	2	9	6	7	15	5	10	8	13	10	5	5	11
C14orf2	52	65	324	400	410	362	239	365	508	238	40	41	169	409	479	223	201	80	283	335	673	630	340	167	729	197	456	462	331	507	627	405	796	232	442	668
C14orf21	9	15	10	33	20	8	6	2	13	9	1	0	11	14	22	6	13	2	17	17	17	20	21	16	19	18	22	8	10	24	32	31	24	26	7	6
C14orf23	12	10	11	4	9	5	4	10	5	1	6	8	10	4	8	3	9	8	8	11	4	17	2	4	16	5	8	6	6	3	12	4	6	9	2	8
C14orf28	7	11	18	25	16	22	25	10	20	15	2	6	13	19	24	32	24	7	18	22	13	27	19	9	31	56	23	17	31	30	38	50	23	44	39	22
C14orf33	0	0	3	1	2	12	5	4	2	5	0	0	5	5	2	6	7	4	5	6	4	3	2	6	14	4	10	10	5	2	7	9	2	8	2	9
C14orf34	4	2	5	29	5	9	5	7	11	10	5	5	6	9	2	3	8	3	5	3	4	5	7	4	56	10	6	4	4	14	6	4	21	6	8	6
C14orf37	14	29	9	94	66	242	40	62	82	19	12	9	27	49	63	30	123	27	72	51	90	58	156	64	291	67	86	50	115	127	225	124	28	53	82	173
C14orf38	3	6	25	11	6	8	4	10	7	11	3	4	9	10	12	15	6	5	6	9	5	14	3	9	15	16	13	15	22	22	24	20	12	20	9	11
C14orf39	5	24	6	74	5	7	11	7	7	7	3	2	8	4	12	29	15	17	12	12	7	9	4	18	5	25	11	18	30	3	27	38	2	18	14	53
C14orf4	21	20	30	132	87	102	45	57	79	77	28	15	66	86	81	90	100	31	82	98	198	65	145	69	181	74	77	86	108	92	139	154	118	111	47	102
C14orf43	77	164	265	617	223	351	259	203	405	313	108	39	211	303	317	495	402	159	334	364	253	606	436	247	437	355	293	223	489	227	501	464	349	475	378	331
C14orf45	13	85	133	98	86	164	73	78	187	73	39	8	67	39	140	139	134	49	100	128	209	302	213	79	355	173	158	148	165	163	217	183	158	109	234	189
C14orf48	5	5	5	3	4	6	4	4	3	6	5	8	3	2	5	3	4	6	4	2	1	4	5	4	4	4	11	5	4	3	11	5	3	3	1	6
C14orf49	11	29	47	32	42	23	23	13	29	22	11	2	18	8	28	29	34	9	26	20	27	74	27	16	55	43	19	32	35	13	23	27	18	36	23	17
C14orf50	3	10	5	5	14	12	8	8	5	0	0	2	1	1	11	14	8	1	4	10	11	5	7	2	43	3	2	5	11	9	8	3	1	3	4	13
C14orf64	1	4	10	40	7	17	10	2	4	11	13	2	5	4	1	22	12	13	4	8	32	10	13	25	1	13	14	30	17	6	3	15	7	23	15	13
C14orf70	1	4	5	1	5	5	7	4	3	3	3	1	2	2	1	1	1	2	1	2	1	0	3	1	6	0	1	1	2	1	3	0	1	1	4	6
C14orf73	6	1	7	5	4	6	5	6	6	3	2	11	4	2	5	5	3	4	2	8	3	8	4	7	6	4	9	3	5	6	4	3	3	1	2	4
C14orf79	0	2	7	20	7	7	13	4	13	7	5	5	6	12	14	6	13	8	12	8	17	11	16	5	14	7	18	14	9	9	9	8	22	9	7	9
C14orf80	3	1	5	5	7	2	9	4	8	1	2	5	4	9	5	2	9	6	4	5	6	8	5	5	11	5	6	2	3	3	4	8	4	5	9	6
C14orf86	2	0	5	2	9	2	5	1	3	5	4	2	2	1	2	2	2	0	3	3	5	5	1	2	2	2	2	2	3	2	2	5	5	1	1	1
C14orf93	8	17	29	63	42	45	26	20	21	22	10	4	20	33	21	35	20	8	17	28	13	66	22	27	74	43	30	46	30	31	38	36	44	32	35	19
C15orf17	44	78	206	254	171	231	218	174	205	141	43	32	126	182	206	262	168	66	232	202	268	270	176	135	204	255	174	196	293	166	313	417	261	292	208	337
C15orf2	10	14	19	23	27	20	14	17	10	23	15	16	12	9	18	13	21	14	14	10	9	25	14	14	28	15	23	19	28	20	24	20	10	19	13	19
C15orf21	8	7	24	11	14	12	14	17	16	19	6	5	13	9	5	16	9	6	10	9	14	52	22	7	33	25	13	29	16	29	19	21	16	13	27	24
C15orf23	18	11	72	28	42	31	26	47	58	17	13	5	39	77	46	14	55	13	51	30	218	159	27	24	131	35	70	44	36	46	30	35	153	57	59	72
C15orf24	59	63	237	594	438	749	347	440	795	307	46	39	298	881	613	443	630	75	442	554	1386	663	698	257	1215	253	680	640	586	665	746	938	1316	407	693	779
C15orf26	1	2	6	10	6	4	5	4	4	4	3	1	8	6	2	1	9	1	4	0	3	3	4	1	2	5	6	1	2	1	2	3	4	2	8	7
C15orf27	5	2	3	2	7	4	8	6	4	2	2	2	3	1	4	3	3	4	4	7	2	4	6	4	2	3	5	4	4	6	4	6	4	5	3	4
C15orf28	6	21	45	28	47	27	22	13	7	3	8	6	8	16	12	18	18	7	30	13	3	34	10	22	7	45	15	23	22	20	24	14	9	50	27	21
C15orf29	9	36	55	60	52	110	67	56	80	47	39	3	68	87	74	67	38	60	104	94	162	124	79	79	144	90	116	52	81	109	82	115	114	76	107	141
C15orf32	4	0	7	6	2	5	3	2	0	2	5	4	5	2	2	3	6	1	2	3	0	6	0	4	0	2	3	3	4	2	2	4	6	1	4	0
C15orf33	4	16	14	17	11	24	11	12	12	4	4	5	14	9	30	13	19	11	25	17	27	24	26	19	33	20	34	22	13	21	33	27	38	24	10	15
C15orf34	6	7	5	3	8	20	12	7	1	9	6	4	9	13	13	5	4	13	4	18	2	9	3	10	6	6	11	8	10	5	5	11	23	13	7	9
C15orf37	4	6	24	5	9	13	3	6	11	10	2	1	10	14	14	9	5	3	9	16	19	21	17	8	26	10	23	6	14	15	18	18	10	14	15	14
C15orf38	10	38	24	134	94	140	105	64	114	64	12	11	39	61	99	106	203	51	126	131	159	75	152	58	178	99	77	53	134	131	143	177	155	104	90	181
C15orf38-AP3S2	30	82	144	206	120	259	172	109	248	113	24	32	113	169	282	229	540	68	184	270	439	319	223	146	384	133	222	210	206	206	233	322	564	270	207	264
C15orf39	25	50	80	78	90	97	43	50	115	57	31	15	41	51	85	91	195	40	65	84	139	167	148	63	179	48	107	71	97	81	153	93	123	122	123	91
C15orf40	5	9	14	29	26	29	45	25	34	28	15	4	17	51	34	47	31	4	44	29	56	45	39	23	73	37	37	32	43	28	44	63	42	53	28	38
C15orf41	24	34	36	53	59	62	45	57	69	34	43	6	48	78	51	65	118	29	71	55	126	76	75	45	142	62	103	88	61	94	61	63	122	69	54	69
C15orf42	26	37	248	115	95	41	24	31	38	34	138	21	50	124	44	28	323	38	103	41	182	328	75	77	191	109	135	107	23	55	29	26	221	70	150	40
C15orf43	5	2	3	3	5	2	2	2	1	3	1	4	0	0	2	2	2	0	2	1	0	4	2	1	2	0	5	0	3	4	4	4	1	3	3	2
C15orf44	24	39	89	111	130	153	86	73	192	79	20	9	63	182	144	87	202	40	157	187	271	186	213	113	190	126	262	155	159	169	151	158	281	169	121	188
C15orf48	6	4	4	4	4	29	7	5	14	6	7	2	2	3	4	4	7	2	2	4	5	2	4	1	46	3	8	9	1	9	7	5	3	5	4	3
C15orf5	8	48	18	17	21	24	11	8	7	21	20	2	38	6	11	76	6	71	149	85	24	39	100	94	19	71	23	9	40	25	41	20	16	97	53	17
C15orf50	9	1	3	3	0	0	1	1	1	3	1	1	1	3	0	2	1	1	0	1	2	3	1	1	1	2	1	3	6	3	1	1	2	1	4	3
C15orf51	7	6	14	12	7	5	5	9	6	12	6	10	6	3	5	5	17	5	9	15	6	11	3	12	16	7	14	4	5	8	9	10	10	11	2	24
C15orf52	16	20	52	25	41	84	26	25	38	32	15	6	90	7	39	41	26	19	49	58	32	35	35	31	15	45	24	28	34	29	68	68	62	58	34	29
C15orf53	3	1	9	2	3	6	2	4	6	6	3	4	5	3	3	1	1	5	5	5	0	2	4	1	6	1	5	2	1	1	1	2	4	6	3	6
C15orf54	7	5	23	7	7	14	12	3	3	12	4	7	30	43	27	19	6	7	7	16	12	28	16	11	15	4	15	10	15	4	9	20	6	9	10	18
C15orf55	6	6	6	5	3	6	9	6	7	10	9	3	9	8	5	4	8	2	9	4	2	6	3	5	7	6	5	8	6	4	4	5	4	7	5	7
C15orf56	3	3	3	8	2	10	4	5	4	8	5	4	1	3	1	3	4	2	1	3	2	7	4	6	3	6	2	5	9	4	28	6	8	4	6	5
C15orf57	33	47	147	173	129	200	166	110	255	109	40	16	87	68	134	145	220	64	127	157	182	220	230	93	287	142	221	192	194	170	253	204	353	135	209	321
C15orf58	2	2	0	3	0	2	1	1	4	1	1	0	3	2	1	3	8	1	0	3	2	5	4	1	2	1	2	2	2	4	3	6	5	1	2	8
C15orf59	4	3	4	3	8	4	6	4	2	4	2	2	3	15	6	6	3	1	1	5	4	3	5	3	6	2	6	4	0	2	4	12	5	5	3	4
C15orf60	2	2	2	3	6	0	5	1	0	1	1	3	8	6	3	5	4	1	5	4	1	0	1	4	4	4	2	0	2	7	0	3	6	8	1	1
C15orf61	4	1	3	19	11	28	10	10	23	13	1	6	6	27	15	11	11	2	13	14	34	11	16	9	23	6	10	17	13	15	34	23	28	18	15	19
C15orf62	5	11	7	11	10	14	8	9	7	8	11	11	8	10	5	9	7	6	16	10	6	14	6	6	8	15	16	9	8	12	7	9	8	13	6	8
C15orf63	23	68	110	237	172	243	119	109	259	141	30	18	119	158	221	135	169	61	115	134	357	199	199	83	230	148	251	272	198	287	390	275	283	185	194	275
C16orf11	5	2	5	4	8	7	3	3	3	11	6	7	4	1	7	8	8	4	7	6	6	7	2	3	12	5	4	13	5	5	10	4	5	7	1	8
C16orf13	3	8	16	22	37	43	14	17	31	14	2	4	23	24	31	23	23	12	28	31	37	59	24	9	49	14	39	27	23	30	36	37	50	15	24	36
C16orf3	0	1	2	2	1	2	4	2	1	1	1	2	2	1	0	0	3	2	2	3	2	2	2	2	2	4	1	0	3	0	4	0	3	5	1	3
C16orf42	4	14	47	67	47	69	33	58	73	28	7	3	30	45	45	39	35	25	29	37	52	69	50	24	68	29	56	50	75	58	59	82	78	38	54	95
C16orf45	16	24	14	53	22	77	81	67	93	49	13	8	45	75	72	49	107	42	57	77	86	61	91	39	43	62	49	65	66	48	30	150	69	57	53	185
C16orf46	8	13	9	23	21	23	21	17	10	15	13	6	11	15	9	23	14	10	12	17	13	20	30	21	20	24	21	22	9	27	28	32	12	21	15	28
C16orf48	9	0	12	16	23	25	14	9	8	12	5	5	8	15	18	12	7	7	13	13	21	17	11	21	15	15	16	9	15	17	11	27	10	28	13	14
C16orf5	10	23	25	89	59	57	38	36	68	49	10	8	28	128	60	74	38	26	45	37	43	80	67	52	58	79	47	40	54	65	90	121	47	68	57	83
C16orf52	23	67	65	345	103	171	87	78	140	100	25	16	119	206	207	236	137	70	131	152	163	166	201	155	165	237	186	154	208	172	167	321	205	210	178	291
C16orf53	31	57	82	381	143	143	67	94	129	62	34	22	72	103	71	103	55	48	104	78	111	252	92	75	124	101	135	123	171	182	157	158	154	187	82	111
C16orf54	10	11	81	14	34	24	39	21	38	33	5	6	19	2	30	47	10	9	24	28	26	193	32	4	32	24	13	32	40	23	25	30	25	43	87	17
C16orf55	10	5	17	9	16	9	5	10	9	10	4	10	3	11	4	4	23	4	18	6	20	25	15	10	6	6	10	17	6	7	15	12	12	12	11	11
C16orf57	60	88	147	227	149	299	103	122	232	116	47	16	149	310	131	102	370	128	221	263	340	255	373	112	518	152	736	305	178	290	354	235	311	163	267	255
C16orf58	24	68	90	325	142	192	72	64	105	53	37	13	63	165	84	100	134	43	95	130	142	172	184	83	131	125	157	66	81	99	139	149	264	78	155	130
C16orf59	1	2	12	5	12	7	5	7	3	7	3	0	4	11	5	2	6	0	3	6	8	11	7	3	5	1	5	5	2	12	4	5	9	9	4	7
C16orf61	35	34	185	140	121	286	137	284	381	150	17	19	142	238	246	102	91	61	201	255	534	363	251	143	428	116	199	217	179	328	507	312	355	110	215	451
C16orf62	36	108	140	757	198	321	235	165	336	169	55	25	127	254	250	214	356	80	276	317	385	321	412	207	316	201	246	191	234	229	346	447	386	297	268	306
C16orf63	43	46	164	135	171	217	168	145	326	165	9	17	211	977	290	278	202	67	199	235	484	490	332	166	409	260	253	320	310	302	374	472	471	291	245	443
C16orf68	7	18	26	5	19	17	13	4	16	4	7	2	14	11	19	6	7	14	18	16	19	24	16	10	14	12	26	15	13	18	20	13	18	10	27	7
C16orf7	2	13	12	10	16	12	5	8	14	11	5	4	5	11	4	4	5	10	15	16	12	9	16	6	16	14	16	7	3	6	13	23	5	17	8	17
C16orf70	23	51	73	184	104	176	71	80	154	54	21	16	62	131	92	92	209	63	172	133	241	159	195	96	263	88	75	138	112	131	182	205	150	83	130	155
C16orf71	6	1	7	5	6	6	9	3	4	4	2	4	2	2	3	5	6	5	4	6	2	6	6	1	7	5	7	5	10	9	12	15	3	6	2	8
C16orf72	74	164	248	331	435	438	257	287	443	201	73	27	312	510	571	546	422	175	448	520	762	691	692	335	722	566	496	465	521	641	689	824	686	530	625	703
C16orf73	3	4	4	17	1	4	4	5	3	11	3	1	4	2	10	3	6	9	3	6	4	5	4	3	4	12	37	14	6	5	12	6	4	3	2	9
C16orf74	1	2	2	7	10	5	5	3	4	0	2	4	2	16	3	2	0	2	8	3	4	19	2	1	5	1	5	7	3	1	7	3	3	3	0	7
C16orf75	9	13	157	34	87	43	12	26	29	13	9	6	26	51	21	25	74	14	34	24	79	150	29	24	156	33	69	62	30	46	41	24	116	37	80	51
C16orf78	1	1	1	1	0	1	0	1	2	0	0	1	0	0	0	0	3	0	0	1	1	3	2	0	0	2	0	0	1	1	3	3	0	2	2	1
C16orf79	2	1	7	3	1	10	1	0	3	1	1	0	2	5	4	1	3	1	1	3	2	7	5	1	3	1	5	3	1	7	2	3	2	1	4	5
C16orf80	28	50	72	224	153	173	142	121	215	90	10	7	92	245	177	170	125	51	123	186	189	200	166	92	213	95	731	256	158	164	228	224	105	109	162	170
[truncated: 20,298 more rows]

## Sheet: Table S2
Table S2. Gene expression profiling of GSE39055.
Symbol	GSM954790	GSM954791	GSM954792	GSM954793	GSM954794	GSM954795	GSM954796	GSM954797	GSM954798	GSM954799	GSM954800	GSM954801	GSM954802	GSM954803	GSM954804	GSM954805	GSM954806	GSM954807	GSM954808	GSM954809	GSM954810	GSM954811	GSM954812	GSM954813	GSM954814	GSM954815	GSM954816	GSM954817	GSM954818	GSM954819	GSM954820	GSM954821	GSM954822	GSM954823	GSM954824	GSM954825	GSM954826
7A5	8.10675	7.89617	8.26365	7.90426	7.89759	8.68609	7.88845	7.84753	7.85083	7.96497	8.81715	7.92234	7.96705	8.12284	7.90231	7.93277	8.19741	7.87071	7.98364	8.13444	7.87338	8.00692	7.9894	7.92754	8.06803	8.09064	8.03841	8.67571	7.91363	7.88118	9.15782	7.93004	7.88653	8.30656	7.98878	7.90835	8.38676
A1BG	9.5378	8.34727	8.17927	12.5563	10.0751	8.31239	12.6441	11.2584	7.98305	10.0182	11.4524	9.25568	8.24987	10.9386	9.1552	8.41332	10.4587	8.18946	11.6789	12.7078	7.95795	9.98611	10.8325	8.23797	11.5225	8.43967	8.79871	8.18939	9.28378	8.53139	9.31813	10.6407	8.38606	9.61287	8.13254	8.24753	9.84223
A1CF	8.13448	8.10597	8.24824	8.259	7.9762	8.47018	8.10859	8.18315	7.88771	8.0949	8.09128	7.89082	7.92259	7.98093	8.03903	7.9294	8.09769	7.88965	7.97917	8.06389	7.8619	7.8924	7.92126	7.88372	7.90486	7.95214	7.99513	7.88813	8.1199	7.91784	7.8568	7.85922	8.17455	8.07245	7.90382	7.91384	8.68553
A26C3	10.0955	8.4193	8.95815	12.9223	7.84121	8.51123	7.83265	8.08476	7.88883	10.9589	7.93411	7.91386	8.82268	7.93303	7.9328	8.93803	7.82786	9.54136	7.89826	7.91094	7.90177	8.51819	7.93067	8.99398	12.0774	9.26069	9.58747	7.93133	7.90595	8.24167	8.89506	7.85759	8.7377	7.88811	7.91197	7.97251	9.37464
A2BP1	8.45493	8.52575	8.9584	9.29999	8.63772	9.26339	9.08762	8.65807	8.01225	8.53066	8.97482	8.09727	7.94179	9.52502	9.7064	8.03924	8.4531	8.62168	9.02786	9.07186	7.88825	8.13512	8.43306	7.97511	8.73679	8.07857	9.31174	8.55949	8.44454	8.09258	7.94715	8.01164	7.96568	8.4667	7.92507	8.93415	9.04129
A2LD1	7.91795	9.38321	8.57929	7.84152	8.27496	7.9042	7.91061	7.90828	9.10622	7.88845	7.84584	10.5578	8.41146	7.83353	7.80309	7.88314	7.82748	7.83991	8.02879	7.83308	8.36872	7.84243	8.27344	9.39537	7.88192	7.88166	7.88208	8.952	7.90595	7.83265	9.30702	7.95167	7.85302	7.86237	9.16015	9.2788	7.83634
A2M	13.7176	14.4876	14.4364	11.7879	13.4458	14.0051	12.0042	12.5264	14.1191	12.5255	12.2324	14.1191	13.8778	14.2597	14.038	13.9328	14.1509	14.3007	11.4776	9.5986	10.3192	14.6711	14.3632	13.7657	10.933	13.9461	14.0679	14.2597	14.5998	13.7789	14.0667	10.2597	13.8705	13.4796	13.4796	14.161	12.5152
A2ML1	7.86226	7.86458	7.97509	9.27892	7.84343	7.84345	7.99592	8.03276	7.86041	9.37998	9.80145	8.11477	7.852	7.94474	8.29542	7.9282	7.94997	7.81125	8.75956	7.84545	7.81123	7.8991	7.85424	7.91635	8.98106	7.88166	7.84672	7.93033	7.97163	7.91357	7.84063	8.30736	7.9175	8.00678	7.89506	7.94966	8.80438
A3GALT2	7.88622	7.90297	7.88209	8.38437	7.92077	7.86026	8.07912	7.88405	7.85948	8.02809	7.85482	7.85704	8.72708	7.86678	7.87828	7.8576	7.8636	7.86978	7.91148	7.90885	7.85139	7.83538	7.88202	7.8601	7.96464	8.40064	7.88149	7.87283	7.89078	7.8522	7.83529	7.86508	7.85134	7.87361	7.85979	7.86054	8.08092
A4GALT	10.588	10.3466	9.95965	7.86812	11.0314	9.52465	13.3319	11.8627	9.52005	11.1352	11.0212	10.7382	9.82928	13.4285	10.2636	11.0685	12.1249	10.4958	9.3497	8.06725	8.79369	10.8464	12.7644	10.3484	12.2493	11.0983	10.4186	10.6517	11.7125	11.7055	10.9969	7.94096	9.29886	10.3434	10.9641	10.4067	9.73838
A4GNT	9.37494	8.46411	8.12005	7.84152	9.1747	8.20366	7.86479	7.9359	7.98065	9.60052	9.49141	8.69183	8.30117	8.19546	9.01651	8.12122	9.92639	8.08952	9.3497	8.38096	7.94344	8.81098	8.28713	8.16339	10.2161	10.1862	8.75375	7.98773	9.35857	8.47758	8.00831	7.98108	8.03101	8.95327	7.97126	8.09539	8.67959
AAA1	8.0194	8.50184	7.92177	8.05025	8.07703	7.90295	8.50027	8.27349	7.88086	8.05176	8.01587	7.99482	9.14884	8.14205	8.00396	7.98513	8.22448	7.9235	8.07683	8.64049	7.89774	8.221	8.23034	7.94407	9.08975	8.97521	8.08553	7.95122	8.28363	7.95129	7.94972	8.55372	7.9207	8.26934	8.01123	7.93274	8.9782
AAAS	10.7329	11.1796	10.5591	8.13402	7.92437	10.1576	7.92007	8.05524	10.1194	7.87411	7.83911	7.97588	7.85038	8.21815	9.77545	10.2516	7.88881	9.84352	8.09901	7.89625	8.49626	8.2784	7.9227	8.84121	7.84716	7.84906	9.5542	9.00589	7.91363	9.82333	9.56406	8.11063	9.51229	12.0538	10.6422	10.4537	7.92453
AACS	8.30571	8.1036	8.04959	9.50358	7.81615	7.98571	7.93147	8.00464	9.62053	7.93	9.41929	9.14209	9.20094	8.03337	8.19794	8.16776	8.87062	9.47338	7.92349	9.64276	9.63639	8.13149	8.87709	10.0831	9.34867	9.29312	8.06895	9.00723	7.94177	8.23815	8.15944	9.33016	9.49851	8.93674	9.01225	9.43786	8.11251
AADAC	8.36895	7.94021	7.85336	9.36965	8.13872	7.92414	7.87667	9.11042	7.9049	8.19253	8.27225	7.97065	7.92212	8.18993	7.97064	7.94972	8.22397	7.91363	8.16399	7.98329	7.92503	7.93093	8.09654	7.95659	10.9244	7.953	8.01829	7.9242	7.97694	7.92067	7.93427	7.90347	7.89527	8.43549	7.91132	7.95656	8.40734
AADACL1	9.15433	8.32902	8.34591	10.1556	9.43821	8.20704	8.97201	9.08764	8.30278	8.96153	9.23203	8.78143	8.10691	10.6006	8.66818	8.28634	9.25892	8.4838	8.41795	9.17175	9.22974	8.27355	8.91726	8.18459	9.4482	8.0491	8.60154	8.1833	8.64901	8.53338	8.27092	8.26794	8.48487	8.84913	8.25802	8.17625	8.99627
AADACL2	7.99955	7.90241	7.89344	8.14689	7.89144	7.86908	7.91061	7.92297	7.82173	7.93	7.86483	7.96275	8.49103	8.1602	7.91875	7.87881	7.83457	7.90553	7.87296	7.85083	7.89811	8.03882	7.98315	7.9539	8.09944	8.22967	7.8889	7.92055	8.38279	7.9077	7.89291	7.89935	7.94267	8.19192	7.91698	7.89561	8.2252
AADACL4	7.87245	8.18821	7.92453	7.89749	7.84442	7.8951	8.54584	8.07535	7.94515	7.89359	7.91303	7.91299	7.90234	7.88452	7.92007	7.97943	7.82118	7.88867	8.05232	7.87454	7.89185	7.85785	7.81301	7.89728	7.87705	7.82747	7.87043	7.98226	7.83319	7.8571	7.87497	7.85056	7.87283	7.87731	7.84646	7.89218	9.30038
AADAT	7.97095	8.72863	8.13184	8.1434	8.24526	8.40399	7.94471	8.12495	8.43392	7.92671	8.26025	8.72718	7.97121	8.9643	8.08606	8.60468	8.23574	8.96875	8.32567	9.03239	8.40847	8.34069	9.02928	8.57819	8.46965	7.99865	8.15939	9.11183	7.93964	8.43489	7.9452	8.1186	8.49539	8.95323	8.33949	8.9867	9.11534
AAGAB	13.8291	13.2058	13.0266	11.4445	14.0435	13.938	14.3976	11.801	11.9858	13.9079	10.1142	13.4519	12.8207	14.4071	13.8663	13.7176	13.4482	13.354	11.0443	9.12705	11.3007	11.8595	10.8963	13.0086	9.42351	12.6213	14.0142	12.3442	12.3987	13.4519	13.7248	9.50082	12.6655	12.6496	13.4602	11.7506	13.0658
AAK1	8.43296	8.59811	8.33552	8.08435	8.07796	8.55704	8.1862	7.96474	8.44626	8.08475	8.13098	8.10444	7.89862	8.00046	8.17127	9.07686	8.74322	8.65206	8.49976	7.99122	7.89328	7.98509	8.14328	8.38948	7.97329	7.92771	7.96723	8.90523	8.01189	9.08221	8.95131	7.89167	7.90236	8.02671	8.08414	8.30324	7.85996
AAMP	8.68681	8.66252	8.60423	13.233	9.19627	8.29592	10.5585	9.35799	8.61039	9.00494	9.45538	9.13321	8.46931	8.24689	8.54958	8.41471	9.23296	8.66476	12.4478	7.94012	8.93285	9.41188	8.55434	8.5322	9.74687	8.6008	8.43796	8.75247	10.1185	9.11698	9.33003	8.33237	8.55551	8.86427	8.11955	8.17176	9.90254
AANAT	7.82138	7.8576	7.84498	7.95336	8.08999	7.82612	7.85285	7.99565	7.84593	7.87624	7.8827	7.83958	7.84971	7.8801	7.81618	7.8567	7.9842	7.87659	7.81289	7.83308	8.11803	7.82707	7.87373	7.84867	7.86959	7.85521	7.82116	7.85876	7.84962	7.82	7.80168	7.82784	7.84005	7.86237	7.85965	7.81564	7.81372
AARS	14.716	14.8371	14.5998	12.4679	14.5529	14.834	12.6959	14.8464	14.716	14.5244	12.2964	14.7013	14.7403	13.1343	14.8575	14.8079	14.3688	14.5697	11.7732	14.6301	14.7651	14.5636	14.5805	14.7275	13.6888	14.3538	14.8045	14.7426	14.6866	14.7651	14.8132	14.1206	14.7596	14.8264	14.9038	14.6986	14.0792
AARS2	12.6263	13.5729	12.2768	9.63047	9.12429	12.7413	9.76861	10.2165	11.4972	11.7281	9.12946	11.5072	12.13	11.6972	12.4828	12.2101	9.68951	11.4972	10.6602	12.0427	9.78606	9.74894	10.3111	12.5578	9.05324	12.5255	11.9886	12.1913	11.3097	12.7267	12.2964	12.3199	13.0349	12.1726	12.1717	12.2292	8.54604
AARSD1	9.68361	8.57519	9.29363	14.5872	10.2197	8.53584	7.93147	9.21843	10.1575	13.1054	8.09982	9.56773	10.3139	11.5364	10.6318	8.57207	10.9157	9.84851	8.7397	7.87622	10.6617	10.1431	8.74586	9.98698	8.14639	9.62834	8.97834	8.27824	9.52412	8.9068	8.742	9.12505	8.84387	9.72452	9.30143	9.86345	9.4581
AASDH	7.92172	7.8737	9.63519	8.82345	7.95844	7.86833	7.89653	9.16628	10.6451	8.12936	7.94674	9.02008	7.89787	9.51748	7.9328	10.116	7.87716	7.87847	7.85745	11.8457	10.8384	8.16366	7.88804	10.2746	8.22567	8.07459	9.90097	10.6366	8.90224	7.91513	8.34145	13.1857	9.96416	8.0804	9.72174	8.79889	7.90349
AASDHPPT	7.89808	7.9848	8.01722	7.81751	7.92437	7.92179	7.88688	7.87621	8.32688	7.85535	7.97784	7.99357	7.93644	7.86681	7.92839	7.93803	8.44252	8.29091	7.88797	9.49882	9.75908	7.87448	7.89868	8.01999	7.856	8.09736	7.93168	8.37104	7.91363	9.01881	8.08189	8.1359	8.83772	8.21992	8.04303	8.23285	8.02806
AASS	9.42184	8.02018	8.01437	8.71514	8.13826	8.76883	7.92337	8.60495	8.76845	8.08318	8.27766	9.40562	7.93509	8.90126	8.27954	8.78432	8.71336	7.92916	8.21035	8.14088	7.87778	7.90642	8.60929	8.4732	8.23496	8.13486	9.66366	8.98002	8.09632	8.32028	8.97595	7.88385	8.02479	7.90818	8.73617	8.26479	7.92747
AATF	7.97719	11.9622	12.4933	9.08697	7.88161	10.6459	7.88688	8.26829	11.4224	7.9111	7.96653	8.68599	12.7005	8.10071	7.90709	8.01769	9.72901	10.5209	7.97355	11.0848	14.7773	7.88037	7.85242	9.57898	7.98773	11.3269	8.85013	9.51616	12.4022	8.64369	8.29857	10.3102	13.9552	8.05729	7.90105	11.1753	7.93802
AATK	8.59045	8.66996	8.39814	8.35885	7.86822	8.00596	10.0008	9.65748	7.8954	8.16993	7.9485	8.01258	7.93815	8.06225	8.12041	7.99086	8.65108	7.98113	12.8696	9.78077	8.37415	8.34563	8.00887	7.90237	8.64718	7.94779	8.02022	7.91408	8.21692	8.12285	8.71906	10.4385	7.96516	8.23632	7.90293	7.94778	8.59988
ABAT	9.02825	8.34032	8.50611	8.39075	8.43993	8.25865	8.19891	7.90301	8.31996	8.61993	7.98426	8.00489	9.04901	8.61382	8.11334	8.53359	9.06912	8.42394	8.10092	8.94279	7.87322	9.05117	7.99669	8.32184	8.12669	9.15391	7.98503	8.71231	7.90012	8.47468	8.34502	9.10196	7.94199	8.79854	8.41833	8.10222	8.77013
ABCA1	13.9355	13.4957	13.7486	14.0037	13.4202	13.6772	11.2214	13.3511	13.3958	13.8412	10.2142	13.571	13.707	12.6014	12.7644	13.1935	12.8193	14.0624	11.2219	8.7308	9.23027	11.2232	11.2567	12.9035	8.13025	13.7683	13.7133	13.6243	10.7482	13.5558	13.0391	9.78737	13.5118	13.9079	13.3723	13.8917	12.6842
ABCA10	7.92375	8.12722	8.64453	8.29494	7.99734	8.94286	9.80393	8.18055	8.63739	7.88949	8.35058	7.88725	8.58289	7.89335	7.88721	7.87703	7.93988	8.06568	8.2617	9.5349	8.21616	7.84852	7.94028	8.12015	8.75782	8.42563	7.86761	8.20048	7.92878	7.89868	9.69926	9.77575	8.20477	8.05343	7.982	8.36195	8.81692
ABCA11	7.87337	8.80681	7.79225	7.89124	7.95346	7.84689	7.90306	8.03276	7.85969	8.78351	7.87622	7.84647	7.88753	7.85336	7.86113	7.8567	7.87482	8.50127	7.97846	7.88605	8.11046	8.07568	7.88427	7.86986	8.29871	7.89181	7.88066	7.87159	7.84121	7.87715	7.89219	7.88381	7.8827	7.86115	7.88475	7.86997	7.88113
ABCA12	7.93038	7.91397	7.93407	8.8188	7.95194	7.89267	8.43023	8.1096	7.88455	8.90853	8.27561	8.06467	7.92978	7.99046	8.26368	7.95417	8.191	7.90659	8.19098	8.18431	7.91946	9.44	8.41202	7.93405	8.82781	7.87931	8.15967	7.93895	8.0223	7.93921	8.05518	7.97007	8.00468	8.43183	7.93122	7.96908	10.426
ABCA13	7.83933	7.83823	7.81816	7.81612	7.84545	7.83934	7.82138	7.82763	7.82607	7.86545	7.91303	7.88037	7.87101	7.83421	7.84946	7.81189	7.85663	7.81654	7.88797	7.94012	7.85353	7.83042	7.79129	7.86937	7.87939	7.79713	7.84988	7.84866	7.87825	7.85391	7.81508	7.82612	7.84264	7.86055	7.86523	7.88097	10.1135
ABCA2	7.97788	7.90769	8.81354	7.97772	7.87714	8.95571	7.94237	7.89549	8.22375	7.85313	7.90924	7.96018	9.08228	7.85087	7.90767	7.85804	7.86951	7.87427	7.97569	8.15926	8.63824	7.8734	8.0846	8.71168	8.23461	8.74813	7.903	7.98979	7.97728	7.90628	7.93821	8.18536	8.18006	9.57304	8.07405	7.90834	8.05142
ABCA3	8.69314	10.9801	9.4459	9.88602	11.1237	10.5616	11.0016	9.05954	9.31924	7.91631	8.21587	10.2361	10.2057	13.8134	10.9974	9.51329	12.383	9.06145	8.06078	8.02799	8.63915	7.9678	9.58661	9.07905	8.23914	10.4999	10.9203	10.4744	10.8429	9.84545	9.39029	7.96744	9.4491	10.715	10.3463	10.0946	7.96606
ABCA4	7.89263	10.8803	9.47268	7.87892	7.87521	10.8755	7.85979	7.98728	9.46715	7.87411	7.85875	7.99721	10.3429	7.90003	10.3601	8.53976	7.87547	9.63875	7.94993	7.89411	8.51179	7.8504	7.87129	8.67571	8.0394	9.78737	7.88966	11.7933	7.87701	9.26319	8.97978	8.61477	11.6378	7.88403	9.0327	10.9247	7.96606
ABCA5	8.65497	8.25824	8.17777	7.97783	8.91304	9.37556	7.88316	7.90116	8.71038	8.03307	8.26808	7.91871	7.89965	8.4028	8.43704	8.49339	7.94622	8.28285	8.23594	8.34595	8.0569	7.85204	7.99702	8.34021	7.85804	7.87963	8.81662	8.2543	7.89295	7.91141	8.89748	8.79936	8.30274	7.87985	8.60529	8.25356	8.54327
ABCA6	8.43665	8.03033	7.95057	8.18338	8.42677	8.03723	8.99665	8.22703	9.40731	8.58598	9.08116	8.23016	7.92784	8.48842	9.26383	8.6572	8.89453	8.42122	8.92354	9.87273	7.90441	7.93753	8.18491	7.96824	8.93861	8.09504	8.12152	8.32448	9.01199	8.04203	8.06805	10.9327	7.98684	8.3211	8.26934	7.98038	9.49776
ABCA7	7.96595	7.94265	7.92917	8.21469	7.89073	7.92613	8.54155	8.27806	8.00272	8.62457	8.01201	7.92411	7.88334	7.96202	8.59959	7.97574	8.32382	7.88451	8.09653	8.00303	8.43265	9.27436	7.96276	7.93709	7.87205	7.86593	8.2595	7.89492	8.19443	7.97198	7.94213	8.11121	8.73841	8.01112	8.1569	7.89773	7.87237
ABCA8	8.38264	8.86679	9.33786	9.90428	10.0162	12.1688	9.91796	11.5185	12.1982	10.6483	9.33784	9.62447	9.04066	10.6086	10.3788	9.99134	12.923	9.38728	10.4769	9.98943	8.59527	9.75672	9.21472	10.2705	8.59817	8.9143	10.6126	9.74233	11.6651	9.44189	11.309	8.59624	9.19365	9.98465	11.5378	10.8836	9.87896
ABCA9	8.61095	8.22875	7.99519	8.55586	8.67513	8.43024	8.49871	8.68203	8.0778	8.41281	9.00411	8.01343	7.99087	8.7489	8.92285	8.31109	8.74628	8.00812	8.20296	8.56569	7.9115	8.35666	8.48381	7.92971	8.67797	7.96151	8.91973	7.94737	7.89549	8.8584	8.6835	7.97967	7.98181	8.44855	8.1013	8.53362	8.11154
ABCB1	8.03733	8.89933	8.31232	9.45809	8.17627	7.9888	8.58761	8.08625	8.05321	8.04504	7.91	7.87973	7.97825	7.9041	7.97797	7.88761	7.93793	7.95652	8.37399	8.11985	7.92935	7.9213	8.26238	7.93968	9.0275	7.86364	7.97121	7.90292	8.31915	7.89282	7.97346	7.95075	8.03315	8.14912	7.8845	8.39584	7.9939
ABCB10	9.87793	9.11167	8.971	7.86675	9.73522	8.8775	11.4551	7.88273	9.47305	7.86455	7.9897	7.94042	8.76867	8.18	7.82995	8.98152	8.11491	9.19569	7.81751	8.52669	10.2317	7.86997	7.90387	9.00316	7.90339	8.67119	9.53337	8.63085	7.87338	7.90594	8.02017	9.13883	9.52465	7.85346	9.27403	8.96636	7.89653
ABCB11	8.06978	7.90501	7.87324	7.89548	8.04442	7.91172	7.84861	7.87367	7.86718	7.87519	7.8827	7.92939	7.8224	7.98363	7.95977	7.89618	7.92803	7.8952	7.89426	7.85985	7.87738	7.94415	7.84945	7.89246	7.92276	7.94914	7.89315	7.86979	7.86479	7.88348	7.89344	7.86846	7.89138	7.95278	7.88652	7.90249	7.93228
ABCB4	7.85551	9.01981	7.87533	7.85814	7.85382	7.84545	7.87397	8.26829	8.56469	7.87036	8.07474	7.89576	8.15619	7.90123	7.93994	7.8504	7.90652	7.86745	9.26848	7.87778	7.90412	7.84062	7.85126	7.85903	7.82642	7.85771	7.7934	7.84705	10.477	9.04465	7.93993	7.85874	7.85257	7.87791	7.85879	8.74877	7.8397
ABCB5	7.88202	7.85086	7.85113	7.87082	7.88643	8.95186	7.85979	8.05524	7.84952	7.8911	7.90865	7.85568	7.86457	7.86939	7.91875	7.83476	7.8602	7.8415	8.10518	7.903	7.86222	7.8473	7.85893	7.84424	7.86634	7.92504	7.91783	7.86679	7.92454	7.84404	7.85888	7.86372	7.87097	7.89403	7.87454	7.8691	7.89122
ABCB6	8.74808	11.1422	11.2542	10.9694	8.7849	11.0569	8.93903	9.97526	11.0059	10.0814	9.35815	11.2912	10.9495	10.5865	10.9857	11.0912	9.86558	10.9664	10.4772	9.6798	10.1804	11.4053	10.5475	11.8002	10.272	11.7722	10.9483	10.9792	12.1241	11.5028	11.7069	9.20713	10.9434	10.8772	10.9547	10.9313	8.53075
ABCB7	10.2663	10.6801	10.5463	7.84386	10.9095	10.6969	8.99405	7.9004	10.3627	9.34119	10.92	10.4964	10.8593	11.4045	10.1809	11.1359	8.15815	10.5969	8.37158	7.87454	9.81839	10.6683	12.6339	10.7565	7.8226	11.3579	11.5313	10.7835	10.3695	10.807	10.491	9.22461	10.5736	11.1826	10.7038	10.7879	10.2116
ABCB8	7.96082	8.39562	8.42189	8.18737	8.13872	8.03537	7.90558	7.85224	8.10954	7.94738	7.87176	7.9242	9.20634	7.89328	9.14436	8.09906	9.07772	9.11113	7.86725	8.35966	8.82949	7.95319	7.90207	8.4763	7.86327	8.85373	8.97066	9.27512	7.93301	8.18347	7.96103	9.96175	8.04482	8.01575	8.83392	8.13603	8.23482
ABCB9	8.81643	9.00151	9.52918	7.95559	8.78085	9.81414	9.96423	7.97919	9.18156	8.53965	7.92382	9.2077	8.34599	9.52306	9.08582	9.64579	8.50075	8.32164	8.35196	7.91966	8.4302	8.88221	8.57112	9.15356	7.96203	8.39902	9.75637	9.44264	8.58279	9.25217	9.79764	8.17333	9.86593	8.82733	9.44184	9.97987	8.15153
ABCC1	8.03386	8.84328	7.87919	7.88242	7.92083	9.77268	8.82095	8.84005	8.39641	8.04753	7.86771	9.69395	11.2447	8.26232	9.33032	7.88851	7.91892	7.9358	11.1237	8.25467	8.95679	7.97108	8.79504	8.1457	8.03124	10.6882	7.98357	8.3691	8.86381	9.59071	9.00162	8.72377	9.07198	7.92856	9.30312	9.89518	9.87357
ABCC10	8.43494	9.49221	9.05437	9.22874	8.58462	9.585	8.10447	8.51495	8.74526	8.7263	8.71652	9.13759	7.986	8.87687	8.21743	8.14496	9.37414	8.44341	9.78098	8.27137	8.84481	8.60485	9.2133	10.3684	9.36155	7.87695	8.2864	8.89053	8.52028	8.12465	10.0937	8.14628	8.21644	8.60051	9.2608	8.92318	8.26941
ABCC11	9.08451	8.13031	8.03642	7.99777	8.65039	8.03725	8.06101	8.07032	7.95161	8.7807	9.41986	8.60036	9.18349	8.52743	8.72059	8.143	7.87862	8.08249	9.03905	7.8967	7.93776	8.23508	8.14826	8.34523	8.39373	8.78372	8.24302	8.09115	8.38661	8.16815	8.05331	7.98958	7.99597	8.42422	7.95021	7.95765	9.67895
ABCC12	7.88995	7.86369	7.90042	7.88567	7.91233	8.69344	8.36197	7.86918	7.84994	8.41221	8.07474	7.88182	7.8807	8.46365	7.92979	7.94167	7.92803	7.88191	8.61795	8.1132	7.8681	8.09736	7.88681	7.91488	8.1722	8.07459	9.2779	8.15298	7.8681	7.89561	7.9103	7.93116	7.89941	7.94397	7.84409	7.91131	7.92148
ABCC13	8.57883	8.0717	8.0326	8.23225	8.89037	8.04669	8.32715	8.87644	7.92147	8.92459	8.85502	8.28019	9.84447	8.57944	8.35511	8.04653	8.76545	7.99417	8.75844	10.5457	7.91552	9.42399	8.87529	8.01277	8.80875	9.77961	8.20522	7.97567	8.53087	8.03452	8.19638	10.153	8.10239	8.60745	7.94974	8.05371	9.19371
ABCC2	8.02327	7.96091	7.92389	8.97863	8.16037	8.93602	9.17235	8.14421	9.3133	8.01323	8.5899	7.94291	7.98012	8.13188	8.11876	7.90631	8.06798	7.90701	8.80974	8.91983	11.8082	7.9678	8.00338	7.89942	7.90339	8.15564	8.06152	7.94263	8.10306	7.89385	8.22797	9.35282	9.19241	8.27935	7.91946	8.07745	8.35804
ABCC3	8.1536	9.88602	9.33393	9.97213	10.8213	9.62649	8.41915	7.89832	9.09435	8.08557	7.92504	10.4689	8.698	9.18788	9.58661	10.8193	8.18427	9.97888	8.94302	9.48891	9.66715	7.93857	9.04032	9.07941	11.0821	8.7377	10.0104	9.66182	10.0201	8.6293	9.96034	8.52061	9.45984	8.05331	9.75062	10.4582	9.57082
ABCC4	7.93137	7.84487	8.16185	7.98664	8.08237	7.88486	8.65953	7.87579	8.13715	8.5856	8.10243	7.88897	8.17932	7.83928	8.66014	7.85319	7.91957	8.91393	7.96488	8.49332	9.1444	9.30238	7.93184	8.11252	7.90562	8.22293	7.86441	7.83835	7.8922	8.53893	7.87559	8.06116	7.97887	7.87361	7.8729	8.19919	8.87475
ABCC5	9.07271	9.85263	9.89265	8.70886	8.36987	9.44265	8.51383	8.06926	10.3011	9.33249	8.28103	9.70325	9.76432	8.74565	8.86975	9.80291	8.83403	9.70979	8.5499	9.87784	8.93224	8.51419	9.03923	9.96288	8.3624	9.59564	9.11464	9.9698	8.72074	10.0591	9.4053	10.5417	9.24755	9.96282	10.245	9.76903	8.68512
ABCC6	8.67245	8.01789	8.00092	8.40864	8.63912	7.988	9.05949	8.70738	7.95049	8.31405	8.63991	8.09768	8.26642	8.23322	8.1968	7.9738	8.3126	8.04532	8.08597	8.52487	7.93747	8.82339	8.26605	8.0796	8.78395	8.42381	8.05285	8.11385	8.19563	8.1684	8.25344	8.80067	7.95974	8.136	7.93195	7.97802	9.28017
ABCC6P1	9.50483	8.41105	8.20836	8.71761	9.96703	8.39449	10.3048	9.92525	7.99704	9.43301	10.2851	8.87075	8.14336	9.77686	8.9708	8.31723	9.90696	7.97936	8.22904	10.2247	7.90501	8.60485	9.55129	8.05944	10.2966	8.00704	8.53725	7.98704	7.88072	8.06088	8.64319	10.7367	8.46028	9.29758	8.11645	8.18957	7.89653
ABCC6P2	8.87802	8.04174	8.01571	8.59638	9.2717	8.16114	10.0744	9.19406	7.94094	8.55819	9.66857	8.17599	8.03065	8.80592	8.78926	8.1357	8.3649	7.94147	8.18516	8.42656	7.89301	8.26822	8.42629	8.05197	10.986	8.32086	8.2718	7.96593	8.35677	8.25234	7.93886	7.87353	7.99291	8.58737	7.9444	8.00188	7.91886
ABCC8	8.48536	8.00133	8.00353	7.96433	8.62245	8.08084	9.06722	8.13473	8.6516	8.54981	9.19105	8.48092	7.98773	9.12463	8.50696	8.14276	9.15463	8.07144	9.87318	8.54934	8.91942	8.60485	9.26725	8.04601	10.0873	7.98434	8.17938	8.00819	8.65142	8.12318	10.5071	8.33664	8.25648	8.78837	8.01759	8.10427	8.40734
ABCC9	9.42727	8.03975	8.6356	9.25182	10.1686	9.06669	8.59615	8.61944	9.17127	9.91736	8.64483	8.54357	9.21473	9.28809	10.4255	9.06931	9.81178	8.97302	8.59931	7.92316	7.95627	8.59402	8.02608	8.94126	10.0263	8.88867	10.261	8.49653	9.79132	9.4556	9.8938	8.33432	9.96959	9.49081	8.86844	9.32075	8.46566
ABCD1	7.85044	7.86148	7.84164	7.86675	7.86454	7.86156	8.88758	7.89832	7.89401	7.8713	7.80394	7.85	7.85392	7.84345	7.86917	7.88513	7.80671	8.04972	8.5147	12.3286	9.33518	7.87448	7.88804	7.83363	7.90916	7.87695	7.85585	7.85037	7.92978	10.8025	10.6777	14.4275	8.13797	7.88257	7.85807	7.85394	7.84952
ABCD2	7.87432	8.37395	7.88172	7.86547	7.90102	7.8866	7.83855	7.84553	8.07506	7.89619	7.91182	8.92955	8.28092	7.89863	7.8951	7.84735	7.87127	7.87718	8.52331	9.04936	7.87685	8.06706	8.02453	8.23334	7.97538	8.30137	7.95772	7.89291	7.95769	7.89384	7.88736	9.58685	7.86292	8.01913	7.9752	8.05622	7.90495
ABCD3	8.3189	8.04737	7.94943	7.9095	8.24037	8.62608	7.87667	8.09417	8.05952	8.99631	8.46282	9.8367	7.97766	8.2006	8.41562	8.63761	9.04059	8.31194	8.43847	7.9282	8.91176	7.8976	8.77221	8.19723	8.50183	7.91632	7.90123	7.98641	7.87701	8.19265	7.9215	8.14531	8.05538	8.10423	7.94712	7.96317	8.03574
ABCD4	8.08033	7.9195	7.88693	11.609	8.06558	7.91907	7.94215	7.91	7.88879	8.00848	8.17018	7.91503	8.19806	7.95286	7.96547	7.90733	8.109	7.87572	8.32074	8.00046	8.03013	7.8869	7.90967	7.87046	10.1006	8.15148	7.94637	7.88286	7.94344	7.89614	7.88311	7.8947	7.88342	7.89578	8.35128	7.8961	8.89234
ABCE1	10.0011	10.0703	10.5602	8.47966	11.0127	10.8856	8.89383	10.3306	10.157	10.7876	8.09298	11.4966	10.1323	10.2116	10.5516	10.7549	9.16055	10.0921	8.84606	8.28817	10.8628	11.7895	9.32818	10.8942	7.87192	9.78703	11.5901	11.2191	9.91161	10.5724	10.6608	8.7988	10.9834	9.36042	9.91406	10.2215	10.5019
ABCF1	10.2602	11.5779	11.3866	9.49547	9.68029	10.9064	12.302	9.56508	11.9283	10.8041	9.34849	10.8602	10.8877	11.1559	10.6235	11.3911	9.36832	11.6852	9.57594	11.2443	13.3151	10.6114	9.66102	10.9355	9.4357	10.708	10.4092	10.6032	10.3087	11.72	11.0548	10.3743	11.6997	10.3945	11.0235	11.0327	10.4376
ABCF2	8.94207	7.89987	8.82477	7.86564	7.93147	8.72476	7.88215	7.9484	8.73203	8.35783	7.9959	7.99486	8.35915	8.48913	7.9971	8.62456	7.90321	7.92341	8.78268	8.54027	10.0406	7.86717	8.09985	7.96967	7.98929	8.32432	8.65498	8.76497	7.8615	8.44884	8.59998	8.81083	8.42003	8.11799	8.43576	8.64669	10.1057
ABCF3	7.84211	9.61147	7.84914	7.86545	7.85691	7.89828	7.8832	7.8786	9.36483	7.83373	7.87861	7.92327	10.8371	7.85879	7.85208	7.87293	7.87404	7.81586	7.86464	7.86832	10.5937	7.86549	7.82133	8.96515	7.88537	10.0122	7.83823	7.8553	10.2518	7.8517	7.88916	8.70085	10.2036	7.86812	9.29829	9.07721	7.8848
ABCG1	8.65725	8.3411	8.24397	8.89063	8.46358	8.5547	8.80674	8.8408	8.1491	8.85069	8.54193	8.46612	8.25223	8.73238	8.29203	8.30112	8.86835	8.36457	8.8931	8.37824	8.31304	9.25432	8.35003	8.14817	8.97384	8.22599	8.56369	8.32856	9.047	8.1992	8.3796	8.43942	8.21742	8.49841	8.19066	8.2742	8.92059
ABCG2	7.85238	7.86981	8.65345	8.82345	7.89759	7.90905	7.83879	7.89334	8.43131	7.80456	7.86608	7.8487	7.84971	7.8801	7.79869	7.89618	12.5411	9.31924	8.05232	7.86409	8.64369	7.88274	7.83728	7.82378	7.83505	7.84533	7.84988	7.84628	9.91751	7.96173	7.86088	7.84345	7.8487	7.89582	8.50794	7.82138	7.88405
ABCG4	11.8627	10.5026	9.07311	11.4898	8.75605	7.94805	9.41077	8.20953	9.30267	10.3973	10.4016	8.9934	11.1089	9.86413	8.08686	9.43594	9.31932	11.4583	9.18543	9.19946	7.96165	12.4686	9.00708	9.88225	9.33577	10.7446	10.1139	9.77947	10.8299	10.6203	10.7688	8.63861	8.06895	10.1817	12.2292	10.1286	8.91294
ABCG5	8.583	8.02768	8.41096	8.15975	8.89322	8.09382	7.87825	8.85948	7.93088	9.73086	8.7776	7.95882	8.65254	8.49932	8.43907	7.95959	9.04059	7.91769	7.98364	7.93585	7.86327	10.8226	8.42629	7.98252	9.08596	8.60726	8.03432	7.87892	8.06851	7.91065	9.52337	7.88493	7.90285	8.34919	7.90064	7.95247	7.9781
ABCG8	8.13417	7.87131	7.8977	7.91593	8.17228	7.96802	9.28677	7.98012	7.9111	8.7263	9.0256	7.9539	7.89703	8.33112	7.89086	7.98033	7.93228	8.71154	8.4143	8.52669	7.84914	8.39397	8.52619	7.96565	8.63986	7.93427	8.00831	7.9437	8.54567	8.03264	9.4381	7.98108	8.07474	8.27408	7.89245	7.95025	11.2023
ABHD1	8.51458	7.95709	7.90728	7.95853	7.88161	7.98295	7.9678	8.05524	7.90347	8.55819	7.94674	8.05062	7.94372	8.12724	8.04551	7.97598	8.68229	7.97065	7.82707	7.89183	7.87202	7.88037	7.88956	7.90105	7.94372	7.88977	8.04922	7.89125	7.87451	7.98933	7.91928	7.85158	7.92242	7.96763	7.9144	7.92718	7.86234
ABHD10	8.5966	7.98643	10.5607	8.29086	8.35632	8.0566	7.95515	9.57913	11.8996	12.8235	10.4315	9.24538	8.04296	10.0471	8.42867	8.01688	8.04948	10.3255	9.28147	9.37045	12.2348	9.91334	9.37249	10.4229	10.2036	7.88812	10.1774	8.93948	8.889	8.70531	8.32955	9.6871	10.1633	11.7445	9.28946	10.3621	8.88611
ABHD11	7.97921	7.84563	7.91264	7.85142	8.13379	7.93616	7.85823	7.82794	7.87965	8.08348	8.17115	7.8807	7.92741	8.28499	8.00097	7.92314	8.21096	7.90181	8.08275	7.84455	8.03175	7.92229	7.88572	7.88653	8.6274	7.95776	7.96213	7.88179	7.97665	7.96593	8.69232	8.15914	8.93843	7.8734	8.67786	7.84896	7.9199
ABHD12	8.29678	8.35831	8.22784	8.03826	8.63203	10.1955	10.2167	9.94278	9.0322	8.75634	8.46704	9.28746	9.96742	8.556	9.22226	9.12689	8.38096	9.23504	8.35502	9.08867	9.80097	8.76718	8.78544	9.08454	8.24243	9.79787	8.94921	8.6785	8.02111	8.21067	8.78773	8.64681	9.203	8.15186	8.88939	9.45358	8.30827
ABHD12B	8.1859	7.95357	7.965	8.27814	8.05577	7.96708	8.77324	8.01981	7.89267	8.70077	7.9918	8.08656	7.91398	8.33291	8.0221	8.63543	8.3067	8.27739	8.47808	8.34581	7.95536	9.13772	8.24778	7.93309	8.21876	7.99251	8.03535	7.96507	8.25345	8.06616	8.65029	7.92951	7.93233	8.18745	8.32212	7.95236	10.2855
ABHD13	9.23662	8.36016	8.35463	8.39913	8.22726	8.14528	8.20229	7.9135	8.28513	7.98553	8.16364	7.96178	8.40522	7.99307	8.65031	8.54694	7.89863	8.2148	8.79897	8.5083	8.20505	9.00084	7.99559	8.312	8.18426	8.94881	7.89141	8.44873	8.44491	8.4959	8.49746	8.5449	8.22422	8.07358	8.29422	8.37781	8.04107
ABHD14A	8.23836	9.90177	10.684	8.10935	8.21093	7.80653	11.0115	10.8683	11.0158	10.6809	7.97202	11.5098	7.76459	8.28923	11.3537	10.3656	8.47931	9.88225	14.6182	8.4024	10.06	13.818	9.94432	11.4378	8.62463	7.88977	7.91325	11.1624	7.87338	8.76717	9.01072	9.51122	10.9886	7.91925	10.5622	10.6905	7.9067
ABHD14B	7.87533	7.8865	9.57161	7.94842	7.96368	7.8816	8.15542	9.47231	9.54094	7.8572	7.90661	7.88114	7.82994	7.85804	7.83521	7.8889	7.86156	9.1043	7.86127	8.05419	12.5294	7.84062	7.88163	7.87419	7.87822	7.86983	7.8571	8.73938	7.85936	7.89448	7.89219	9.68223	10.92	7.87406	8.83476	7.82659	7.95103
ABHD15	8.16646	9.29558	8.99411	8.53498	8.08999	9.43216	9.63731	9.56222	9.24796	8.11529	8.02705	8.50024	10.1164	7.89218	8.01767	10.1092	8.1702	8.99308	13.5545	12.8992	10.0985	10.2762	8.8311	9.54643	8.07588	10.2144	8.14563	9.54816	11.1163	8.42809	10.6517	13.081	9.94271	7.91806	9.56204	9.68177	10.3895
ABHD2	8.96432	8.20772	8.71001	9.60631	8.87408	8.82901	9.04828	8.71595	8.45468	9.00492	9.04699	8.7444	8.04958	8.83006	8.64363	8.27451	8.93412	8.82324	8.38881	8.45438	8.1588	8.50765	8.8355	8.11333	9.5968	8.18547	8.47071	8.58284	8.85979	8.66917	8.25821	8.18827	8.52373	8.88849	8.93044	8.97145	8.42392
ABHD3	7.84656	7.84181	7.83985	7.83933	7.82843	7.85128	7.87006	7.85314	7.95103	7.86647	7.88004	7.85825	9.33236	7.85257	7.83589	9.30314	7.90489	7.87337	7.89315	7.81919	11.2209	7.85979	7.84387	7.85038	7.8277	8.72725	7.87746	8.89161	7.85757	7.85288	7.93012	9.58543	9.78956	7.84367	7.78105	8.43597	7.83572
ABHD4	8.3816	7.95709	7.93262	8.13402	8.50312	9.82381	10.0413	8.80927	10.5511	8.29273	8.68252	8.09748	7.97322	9.76099	8.25684	10.8946	8.53032	11.3933	8.80974	9.38087	10.2861	8.49582	8.77221	8.46251	9.78693	8.26613	10.6672	10.7976	8.81072	8.83852	8.08624	8.95647	8.91845	8.44256	10.4176	9.59881	8.86799
ABHD5	7.87861	8.97692	8.9372	7.8642	7.84545	7.85254	8.20075	7.92921	9.34579	7.88067	7.84075	7.85621	8.92251	8.07837	7.94423	9.00211	7.8969	8.59362	8.6984	14.2776	11.0753	7.85979	7.84756	7.88568	7.85428	8.1957	9.42562	7.88359	7.82224	7.86714	8.57477	9.88416	9.42522	7.88166	9.00244	9.04192	10.8425
ABHD6	9.09321	11.9952	10.0777	10.028	9.45141	10.7312	9.70972	9.54508	9.87895	8.82639	9.05539	9.36349	8.02391	11.1539	8.55693	9.7416	9.22431	12.0744	8.83546	12.4748	12.199	7.91267	8.22486	10.6668	8.14639	7.88977	11.8635	9.75779	9.1249	10.2575	9.99761	14.4721	10.5432	8.91365	11.6953	9.90896	8.40734
ABHD7	9.17161	8.41862	8.12949	10.6057	9.52803	8.24406	9.1966	11.2831	7.9659	9.09666	10.2993	8.58981	8.71371	9.03904	8.85998	8.22866	10.0875	8.09092	9.61045	8.06725	8.05641	9.06327	9.00708	8.69462	8.99462	8.61197	8.9554	8.17202	8.24666	8.50651	8.23041	7.98952	8.19717	10.2907	8.03259	8.4675	10.1468
ABHD8	12.5429	11.6168	10.4643	10.3792	12.3512	12.4786	10.3595	12.3286	10.9969	11.4513	12.407	12.1755	12.8293	11.2239	11.0999	13.2404	11.5602	11.8124	10.5486	10.1647	8.76828	10.3861	12.7559	10.896	12.2559	12.4376	12.2433	11.3883	11.0506	12.5303	13.1737	10.8574	9.57563	11.0614	11.684	11.9456	8.91003
ABHD9	8.21804	8.67387	11.053	9.52249	8.10988	11.2584	7.94968	9.67344	11.6556	8.28362	8.60695	9.03434	8.0021	8.03337	8.00713	9.73592	7.97552	9.37018	9.32219	9.41256	8.31798	8.90011	9.29106	9.90834	9.70833	7.91632	8.56846	9.9907	9.33079	11.4465	10.0477	8.24248	8.28609	8.90732	10.2706	10.8994	8.97073
ABI1	8.80922	8.37169	8.28224	8.26395	9.06724	8.49898	8.48251	9.50993	8.21594	9.36318	8.89946	8.78494	9.42635	8.77025	8.67964	8.43213	8.32108	8.47334	8.05218	8.49291	8.32297	9.33536	8.76061	8.61674	8.96256	9.43452	8.76329	8.35758	9.05221	8.4569	8.45633	8.01941	8.37616	8.97607	8.35215	8.36856	8.93278
ABI2	10.3625	9.94394	8.87555	10.5874	10.1949	9.83427	10.7187	11.5075	8.72535	9.76073	10.3319	9.00833	9.72412	9.68736	8.93294	8.7219	9.77277	9.47112	9.38397	9.89319	8.74566	9.63981	10.6114	8.70582	10.5256	10.1751	9.90462	8.76567	10.2861	9.12946	9.34909	8.78312	8.99901	9.54631	9.12264	8.87049	9.273
ABI3	10.6262	10.4012	9.57624	8.71761	10.8312	10.6604	7.84952	8.93927	8.27104	9.58543	9.53573	10.0307	10.0777	11.2216	10.4628	10.7105	11.7001	9.52691	8.23933	8.12361	8.06633	10.8347	9.40055	9.34445	12.4672	11.2264	11.3412	9.18334	10.3123	10.3742	9.1713	7.97355	8.96067	8.83738	9.73564	10.1497	7.95324
ABI3BP	8.27753	9.79272	9.54115	7.96433	9.02505	8.75698	8.70345	9.73653	10.1435	11.0725	7.96205	9.97771	8.00596	8.3167	9.80268	9.83173	11.4685	8.56042	9.26848	8.19585	8.1486	10.4896	10.7221	9.75263	9.9553	7.91915	9.19958	9.92768	10.4181	9.92308	10.6049	7.90594	8.8483	10.0731	9.2333	10.1111	7.90774
ABL1	10.0606	10.0505	10.8105	9.24971	10.4011	10.5846	9.33533	9.74796	10.3172	10.1947	9.4799	10.3061	10.7494	10.2927	9.94223	11.0409	10.7416	10.1592	9.91265	8.49655	10.2553	10.1576	10.1676	10.1631	10.8306	10.6819	9.92489	10.4644	9.99233	10.131	10.2322	8.93747	11.0062	11.6427	10.4644	11.019	9.77724
ABL2	8.56722	9.44733	9.90605	9.47686	10.3246	9.50136	8.36117	8.41745	8.26817	8.30698	10.0397	8.5428	9.53125	8.36614	9.34783	9.27593	8.44971	8.99821	8.48312	8.71693	8.27782	8.52342	10.801	8.95755	9.04094	9.42065	8.42044	8.72164	8.39379	9.06683	8.35121	8.24306	9.17305	9.02401	9.61681	8.75854	8.62726
ABLIM1	9.57275	8.78543	8.53777	8.31617	8.5279	8.9958	9.02347	8.49397	8.8665	8.05486	8.58743	8.34363	8.88357	8.08839	8.40692	8.70785	8.7624	8.80785	9.4009	8.64426	10.34	8.18958	8.07516	8.71722	9.16545	8.74918	8.02925	8.26307	9.14801	8.18708	9.35908	9.01094	9.64273	8.17899	8.53972	7.91818	8.32483
ABLIM2	8.14926	7.93253	7.90799	8.76903	8.29416	7.92179	8.75513	8.30555	7.9139	8.50495	7.89425	7.9539	10.6903	7.92922	7.91875	9.73204	7.87716	7.9035	9.256	7.92449	9.01184	8.58491	8.21499	7.91833	8.63986	9.71558	8.33811	8.10088	8.43841	8.04922	8.10109	8.24592	8.15978	8.21992	8.79822	7.92007	7.95975
ABLIM3	9.55276	8.51464	8.3853	8.97863	9.91318	8.35699	11.2626	10.5726	8.35883	9.93975	10.8017	9.13857	8.13727	9.65047	9.10103	8.31952	9.99247	8.63416	8.77855	9.85064	7.90488	8.81852	9.64543	8.26162	10.426	8.10933	8.58516	8.23379	8.11581	8.56228	8.37442	8.01451	8.58015	9.53348	8.83011	8.24572	8.15578
ABO	10.0172	9.82077	7.8827	8.59638	7.87667	10.59	8.20075	7.92297	9.37018	9.13649	8.13049	8.13605	11.8373	9.59099	10.89	10.224	9.02239	9.35751	7.86639	7.96654	8.12153	10.5152	8.34304	7.92503	8.93386	11.1603	10.4153	8.30661	11.6749	10.0024	7.9215	7.8884	8.08632	8.3306	9.63099	9.57023	13.1416
ABP1	8.03536	7.97913	8.99848	8.04242	8.06761	8.00819	7.87667	8.44004	7.88798	8.22786	8.09256	8.00745	7.93196	10.074	8.02754	7.93614	8.1635	8.94606	7.89826	7.903	7.93954	8.60485	8.09654	7.98976	8.09944	7.953	10.1778	7.94968	7.94475	8.19959	7.98916	7.91007	7.9894	8.41491	8.98142	9.00861	8.02329
ABR	8.80012	9.03069	9.83442	8.00475	9.45543	8.46991	10.0893	10.6145	9.33129	8.29908	8.43348	9.15365	10.2772	8.70389	10.279	10.3934	8.61128	9.10445	11.9653	8.72967	8.68277	8.87199	8.46488	10.1969	8.36994	9.75517	8.71559	9.33357	8.77795	10.5109	10.1477	9.10929	9.90675	8.74765	10.8261	9.32526	7.9833
ABRA	8.08945	8.12847	8.00821	7.9067	7.97065	8.19661	8.48395	8.19779	7.97782	8.19898	12.2156	9.29758	8.27576	8.90213	9.23681	8.18421	7.86369	8.01271	7.94993	9.4458	7.97025	7.96009	9.86012	8.06462	8.13826	8.02725	7.91571	8.11653	7.9027	8.32419	7.92389	10.2849	7.91853	7.9067	7.99587	8.10678	8.01862
ABT1	8.49208	8.31934	8.34684	7.88929	7.85253	8.47584	7.92007	8.8757	8.12418	8.21036	11.2831	9.41219	8.13537	7.75593	9.1101	8.43799	7.98931	8.24987	8.25067	7.91385	8.18771	8.97436	10.9445	8.33436	9.20354	7.93767	8.22028	8.39106	9.40622	8.84507	8.61816	8.12712	8.69379	9.70154	8.1182	8.24649	9.10991
ABTB1	9.16029	9.07987	9.33135	9.79529	9.44269	9.03929	9.08176	9.98967	8.85807	9.60285	8.78092	8.95538	9.14647	10.5661	9.4885	9.01162	9.62056	8.7201	9.2185	10.9725	8.36127	9.27639	9.58275	9.12005	10.339	10.1562	9.74411	8.92773	9.58305	9.37384	9.67574	8.29741	9.24734	9.10231	9.20501	8.80572	8.74969
ABTB2	8.14178	7.91806	7.90241	7.97085	7.84545	8.80298	8.30777	7.95393	7.88761	7.93681	7.88667	7.86283	7.85392	7.87351	7.92718	7.90249	7.9645	7.90392	8.23933	7.93193	8.23115	7.91886	7.95222	7.8936	7.98773	8.03555	7.97693	7.84341	7.9027	7.91187	7.89686	7.92535	7.9356	7.9067	7.85576	7.85484	7.96175
ACAA1	8.27753	8.02549	9.04367	8.62625	9.07894	10.388	7.95515	8.33925	9.18743	8.05085	9.2433	7.96585	10.145	9.76099	8.14902	9.27707	8.1635	8.83667	7.91233	8.01486	9.1438	8.05432	9.33402	7.94157	8.03036	9.82964	10.297	7.96593	8.22274	8.13352	7.94095	8.24059	8.20424	8.45508	8.85393	9.99571	7.85037
ACAA2	7.85875	9.40954	9.16615	7.97085	8.01908	9.27092	14.1879	9.12475	11.7001	7.87411	7.87733	7.84815	10.2433	9.0921	7.87283	9.5785	7.8166	10.3335	9.51494	9.84332	13.8743	7.86874	7.87881	7.88976	7.84376	9.65704	9.58661	10.1271	8.41315	8.4465	9.40414	10.4545	11.6343	7.86752	9.89999	9.63435	8.41571
ACACA	7.88429	10.1236	11.4014	8.22161	7.88366	10.5683	7.942	9.06577	11.2562	10.7147	8.20149	10.4061	10.0068	10.1064	8.57892	10.9651	8.33156	10.8238	9.21771	8.91126	12.0734	10.9211	9.22674	10.9701	7.87897	9.58993	10.7821	11.0388	9.22661	10.7486	10.5566	9.52255	10.7849	9.23475	9.90516	10.6224	8.87457
ACACB	14.3649	14.1041	12.6306	11.3216	13.6961	14.1372	14.3925	14.8871	14.071	13.6478	11.4898	12.0927	13.607	14.0546	14.3859	14.0846	14.2051	12.6144	13.304	14.3758	10.247	12.578	13.4826	12.1433	12.1502	13.3263	14.5341	13.7288	13.5607	14.0063	14.1734	10.305	13.7605	12.6399	13.845	13.4966	10.6196
ACAD10	10.0529	9.42717	10.0827	7.99936	8.08999	9.78676	7.89246	8.47704	10.3597	11.1796	7.89747	10.129	8.58794	8.68405	9.97626	9.80496	7.91988	10.0895	12.5825	10.395	9.01206	9.45152	8.18667	10.4027	7.93116	8.41779	9.81436	10.4134	9.61553	10.3058	10.4474	10.9221	9.52882	10.6722	10.4672	9.99914	7.88405
ACAD11	10.3331	10.4663	10.9928	8.41567	8.17228	10.9917	10.0744	10.1311	12.1707	10.1561	8.76058	10.3268	9.99275	9.79588	10.9438	10.5432	8.50056	10.4194	13.1924	8.27137	10.0632	12.5387	9.54467	12.2648	7.97197	10.585	9.94729	11.0465	11.0725	11.23	11.4266	8.86498	10.1556	8.11682	11.473	10.035	8.17647
ACAD8	8.80187	8.38777	8.74063	7.89952	8.96949	8.92817	10.0526	8.08929	8.72947	8.76309	9.36688	8.58388	8.01224	9.63916	8.51656	9.40469	7.9806	8.54298	8.24104	7.82823	8.74232	8.78665	7.98529	8.62508	9.51869	8.11085	8.39941	8.9954	8.71823	8.34003	8.25443	7.92825	8.14586	8.72712	8.77159	8.59907	8.45024
ACAD9	8.53516	10.6654	11.9284	7.91928	7.90446	9.98568	8.41915	7.94245	11.0144	12.8787	8.93707	12.2172	12.8093	10.1578	12.6701	10.5937	10.5288	11.384	9.69895	7.92066	11.3379	9.9449	10.2094	12.1879	9.20354	12.1171	10.1547	11.7132	12.6306	11.6756	11.9467	9.61818	11.4109	12.719	12.1142	11.6718	12.8052
ACADL	7.87533	7.87881	7.87201	8.53498	7.84673	9.19786	7.89035	7.89334	7.84065	7.88721	8.24081	7.83107	7.92883	7.9689	7.86056	7.84867	7.95278	7.88517	7.88044	7.84413	7.87656	7.87448	7.88804	7.86157	7.91773	7.89967	7.90686	7.86017	7.92233	7.86463	7.83617	7.8884	7.85681	7.81314	7.8374	7.89008	7.87847
ACADM	9.82209	9.89126	11.0335	11.2225	9.97251	9.62704	9.08072	10.8107	11.0613	9.84318	10.2137	11.4655	9.56853	10.5647	9.57849	10.9235	9.7747	10.9546	9.06436	8.6705	11.1929	9.46916	11.9937	10.0765	11.7485	9.89914	10.1981	11.6101	9.80695	10.5355	10.33	9.20577	10.6511	9.33945	10.3048	10.3381	11.2276
ACADS	7.90726	7.87454	7.88794	7.89749	7.87364	7.93755	8.10447	7.89515	8.45236	7.90302	8.02705	7.91197	10.3656	7.8968	7.92295	7.88031	7.87632	7.89367	7.91068	7.8614	9.22508	7.91075	7.87744	7.90667	8.11389	9.74859	8.06152	7.90725	7.95079	7.90042	7.92924	8.22129	8.14837	7.98207	8.65807	7.9009	7.92747
ACADSB	8.82406	7.95446	8.32934	8.74352	8.70062	8.59417	9.30945	8.71007	8.24602	8.54981	8.55379	7.91197	8.88758	8.2006	7.92592	7.9559	7.90081	8.35822	8.33336	8.7308	8.10138	8.03882	8.25966	7.89474	8.90505	9.1962	7.92803	8.18188	7.93877	9.09882	9.04509	8.10769	7.94415	8.05331	8.18737	8.30054	9.23432
ACADVL	9.86056	9.8755	10.1474	10.9698	8.76932	10.1341	9.49032	10.3299	10.1071	9.62724	9.58306	9.98398	10.082	9.94553	10.3734	10.081	9.5971	10.157	9.1473	9.59831	10.44	9.1536	9.81364	9.8829	9.041	9.97619	9.72483	9.99956	9.6751	10.129	10.1189	10.0634	10.0584	9.75958	10.4671	10.4907	9.35392
ACAN	11.6789	7.83352	10.0291	7.83612	10.391	7.82795	10.7152	8.33925	11.3626	14.2193	7.95025	10.0182	10.1657	10.783	14.447	10.6742	11.1172	9.33508	8.16399	7.92449	8.13284	10.141	7.87881	11.9681	7.83353	9.41234	11.4371	9.5395	14.8547	12.8411	11.2802	7.92429	10.4417	7.86933	11.0741	10.4566	7.84462
ACAP1	8.14572	7.99525	7.9186	8.71761	8.37567	7.95625	9.92112	9.24169	7.89582	9.08186	9.49141	7.97588	7.86498	8.14595	8.10298	7.92997	8.00541	9.16001	8.71076	8.71056	7.90287	8.10359	8.44085	7.93035	8.55501	7.91632	7.90213	7.92389	7.90965	8.1002	7.88166	8.07842	7.99553	8.2151	7.91132	7.9571	8.69894
ACAP2	7.87245	9.30359	7.89643	8.17246	10.9652	9.31692	7.85979	7.83942	8.91603	7.85037	7.84152	8.01813	10.1017	9.54172	9.60269	10.0773	8.1702	9.58715	7.91762	8.14529	10.3422	7.92601	7.82053	9.45363	7.84376	9.66528	9.94653	8.14382	10.868	8.17018	7.89575	8.66834	8.40531	7.84411	9.34876	8.7843	9.22866
ACAP3	11.1143	7.86754	9.66431	7.88567	7.832	9.23296	10.7925	13.7874	8.73498	7.91631	7.82892	7.90928	7.86237	7.9573	9.3602	9.15672	7.90347	7.97232	7.82118	11.095	8.21376	7.84426	7.86194	8.86237	13.8601	7.88318	8.85189	9.18487	7.8681	10.8526	7.93522	13.0215	7.88068	7.85165	8.97798	7.84651	7.80085
ACAT1	10.8384	9.61341	8.91489	13.6203	8.10988	11.0018	11.087	12.7669	9.96566	8.69454	8.30286	9.19986	9.01115	10.0297	10.2521	10.0036	9.98787	10.0246	8.93251	9.50705	12.2702	8.07568	8.66774	10.138	7.97197	8.77474	10.5156	10.1341	10.9288	10.6146	10.1473	9.82467	10.3023	10.2382	9.5548	9.9795	10.5503
ACAT2	8.0231	8.16208	7.99397	8.07588	7.9945	8.20967	8.49761	7.8822	8.97298	8.0678	8.16082	8.3023	8.01588	7.94739	8.46725	8.28044	7.89658	8.60127	7.90107	8.13743	10.4821	9.09924	8.65396	8.13948	9.42077	8.00714	8.50254	8.73704	7.93184	8.43705	8.42811	9.02607	9.3512	7.91973	7.93399	7.9382	8.05798
ACBD3	10.5432	10.5698	10.4678	7.94842	8.16037	9.05478	7.92333	9.07674	10.7972	11.5919	8.03558	10.0615	8.8005	13.2937	10.2061	10.529	8.4193	10.8818	9.11322	13.9933	9.71193	10.7131	8.91176	10.9529	8.60662	8.94891	10.1455	10.9694	9.01225	10.6308	10.7205	9.05446	9.61573	10.425	10.0288	10.488	10.1573
ACBD4	8.22788	8.08999	7.93262	7.87337	8.68222	7.97372	8.20075	9.24169	8.20326	8.07375	8.51827	8.12759	8.0599	7.97245	8.10079	8.00355	8.71007	7.93616	7.91068	7.86531	8.33856	8.13823	8.17767	7.93167	8.32904	7.9087	8.17486	7.93877	7.90446	7.98032	7.92098	8.13471	8.00013	8.28866	7.92407	8.00704	7.95324
ACBD5	8.81885	7.89064	7.87257	8.8906	7.88661	8.04022	7.97295	8.85504	7.92818	7.90406	8.60788	7.864	8.35977	8.09178	7.90644	7.88947	8.01723	7.8948	8.34133	7.88463	8.38095	7.86411	7.8878	7.85636	9.36869	8.17685	8.44371	8.12911	7.85946	7.87387	7.8744	8.03064	7.87249	7.96544	7.97727	8.0791	8.42833
ACBD6	7.95787	9.36252	8.77614	7.86812	7.95844	9.28655	8.54584	8.09417	9.94316	8.10564	7.93706	8.78422	7.8974	8.21171	7.95169	8.10677	7.93482	9.26617	8.2006	9.85628	11.3364	7.92863	7.88537	9.71539	7.89681	7.9087	7.96322	9.66537	7.92454	8.04922	9.45886	9.36872	8.75855	11.3847	10.2788	9.42749	7.9362
ACBD7	9.05112	9.66556	8.88152	11.2127	9.09006	8.96816	10.498	9.78567	8.17486	9.62845	9.83895	8.69326	10.9368	10.6667	8.80075	9.41885	9.32571	9.7207	10.9219	10.911	8.13201	10.6883	10.025	9.20432	10.3626	11.0644	9.45416	9.09363	8.80231	9.26926	9.16861	10.9601	8.25825	10.0508	9.12516	8.91867	10.0115
ACCN1	12.949	10.8876	9.3866	7.88246	7.8275	7.82998	9.1966	8.2218	8.49431	7.88973	7.86396	7.89899	7.82839	7.86284	7.86993	8.84064	9.88822	7.84065	7.90389	7.87778	7.86455	7.82428	7.78971	9.39063	7.86235	7.86445	7.86782	7.86809	12.3762	7.84801	7.83985	7.82074	7.82289	7.88563	7.80988	9.29414	7.91761
ACCN2	8.01161	8.7333	10.6933	8.6104	9.57799	9.21837	10.9952	8.72709	9.71679	10.0067	9.69332	9.17089	9.27617	9.45165	9.12113	10.7257	8.20645	9.10776	8.96456	9.55976	8.52315	9.73814	10.8027	9.16973	8.01845	9.3254	9.84464	9.35829	9.17896	8.6637	9.61707	9.94249	8.8223	8.33853	9.44445	9.0958	7.92716
ACCN3	8.55369	8.62273	8.0182	7.9932	8.77782	8.13534	10.1719	9.38409	8.30536	8.72515	8.71803	8.4015	8.03206	8.31937	8.5744	8.14254	8.91222	8.39894	7.97507	8.18574	8.98879	8.7528	9.48383	8.09751	9.81028	7.90888	8.51148	8.08304	8.70498	8.28757	8.2423	8.28279	8.35057	8.83196	8.23276	8.04454	8.48985
ACCN4	8.33366	7.92871	7.92912	7.91561	8.19223	8.00608	8.88667	8.14504	7.90742	8.22916	8.60051	7.99107	7.91101	8.20754	7.99291	7.94216	8.33651	7.93932	8.07821	7.98694	7.91297	8.22955	8.46677	7.92693	8.47042	8.04207	8.07569	7.89998	8.48141	7.92106	8.39435	7.88245	7.93138	8.18952	7.91293	7.93147	9.51592
ACCN5	7.91204	7.85613	7.8672	10.7131	7.91512	7.85903	7.91061	7.94608	7.86997	7.85535	7.84756	7.91593	7.87339	7.86147	7.90931	7.84029	7.89552	7.82246	7.98878	7.85731	7.89915	8.03048	7.91112	7.87774	8.43172	7.94531	7.86782	7.87203	7.93301	7.90175	7.93993	7.94096	7.88564	7.92198	7.89996	7.88851	10.1728
ACCS	13.1708	13.4826	12.8936	11.5313	14.1247	13.7577	11.2648	13.2252	12.0685	13.4069	11.8821	12.7234	14.0128	12.451	13.7774	12.5498	12.8569	12.8093	11.4027	9.95757	9.74287	13.4351	13.8726	12.2016	7.91306	13.9167	13.3902	13.2537	14.2885	13.4567	14.0205	9.62095	13.068	12.8811	12.8703	12.9792	11.9614
ACCSL	8.12729	7.94562	7.93565	8.05166	8.04915	7.87857	8.44071	7.91729	7.89714	7.95404	8.92683	8.00583	7.93291	8.11165	7.99938	7.90342	8.19179	7.91075	7.99758	8.282	7.91599	8.34158	8.10417	7.9778	8.50273	8.00538	8.14533	7.99282	8.20165	7.92154	8.03531	8.04813	8.01626	8.26314	7.93263	7.95858	11.2574
ACD	8.681	7.98643	9.71509	9.11434	9.30878	10.8343	9.24339	8.53348	9.76878	10.5319	8.64659	9.11175	8.07086	7.89218	7.97744	9.95965	7.94224	10.1375	7.92541	7.90559	11.0102	12.8731	7.94839	10.1209	8.21425	7.92198	8.1473	9.86239	8.19333	8.5486	8.1664	9.28483	10.7534	9.13557	10.1628	9.33306	9.11719
ACE	8.01931	7.87577	7.87764	7.97555	7.87233	8.40744	8.11318	8.04734	7.85862	8.0909	9.88895	8.08458	9.59643	7.98872	9.19645	7.88569	7.98595	8.9073	7.91197	8.72719	7.88835	8.24978	9.27268	8.07287	8.00235	9.33135	8.38435	7.87823	8.17696	8.05866	7.90188	8.80668	7.91029	7.96949	7.87292	8.20695	9.01624
ACE2	8.12339	7.8865	7.90106	8.14689	7.88161	8.06963	8.20075	8.25231	7.92681	8.06211	8.12344	8.06917	7.90686	7.97985	8.04862	7.9179	7.91797	8.61056	8.25067	7.98329	8.33133	10.1785	8.51217	7.95318	8.94947	7.94147	8.0117	7.90725	8.42573	8.1278	7.93522	7.92818	7.9781	8.80927	7.92007	8.60244	10.6324
ACER1	9.01231	8.08724	8.00031	8.44088	7.87939	8.03648	8.20409	8.04511	7.89712	8.62064	7.91713	8.28518	8.8084	7.9023	8.2164	8.02043	8.93277	8.00471	8.15147	9.91005	7.941	8.60396	8.3739	8.04492	8.45494	8.55113	8.30046	8.01094	8.70955	8.13567	8.2793	10.9913	8.14024	8.58097	7.95311	8.00583	10.6385
ACER2	8.44984	8.30679	7.99573	8.02975	8.75628	7.95641	8.35205	8.43563	7.92963	8.39739	9.20182	8.30174	8.17899	7.90245	8.27141	7.99921	8.47395	8.03278	8.67981	8.70531	8.24632	8.66792	8.60226	8.29396	8.96737	8.3039	8.35018	8.04131	8.5786	8.14144	8.20936	8.0889	8.06431	8.54504	7.9235	8.02883	8.54077
ACER3	7.92349	8.99184	7.90241	7.87454	7.95844	7.86227	8.02309	8.11786	7.9049	7.89488	7.92242	8.00464	8.7804	7.9407	7.90453	8.90724	7.89208	7.90309	7.85448	7.89411	8.15798	7.8667	7.89262	8.66928	7.95045	8.53653	7.94857	7.88235	7.92978	7.8517	9.2015	7.88639	7.8776	7.8832	8.40681	8.59842	7.86712
ACHE	7.99925	8.70523	7.90047	8.11742	7.93538	8.38663	7.99178	8.03384	7.86741	7.97139	10.7896	7.91413	8.07564	8.19529	8.00139	7.89771	8.00046	8.24788	8.04771	8.4073	7.88077	8.22139	9.51937	7.88551	8.23884	8.04608	8.09217	8.52683	8.13635	7.92632	7.94947	7.85432	7.90891	8.07204	7.84292	7.86582	7.93685
ACIN1	8.49208	7.96765	7.94515	8.2443	8.50312	9.46821	7.94449	8.8757	9.39199	8.04421	8.5734	8.97767	7.93879	10.0325	9.69895	9.71063	8.2317	9.42281	8.56404	7.89183	9.89675	7.95319	7.92534	10.1286	8.77913	7.89967	10.9252	9.68578	8.30615	8.30492	9.75945	8.55084	9.7776	8.55113	9.321	9.84429	8.04076
ACLY	11.5521	11.6991	11.582	11.3246	12.1949	11.6787	10.8405	11.7995	11.4014	11.9899	10.9972	11.8984	11.548	11.6281	11.5444	11.4787	12.64	11.7899	11.4443	12.2752	11.6643	12.0409	12.211	11.4129	12.0446	11.5669	11.8711	11.4299	12.3595	11.8567	11.8059	10.326	11.7931	12.3254	11.4657	11.5553	11.8548
ACMSD	7.87137	7.84297	7.85963	7.95853	7.8709	7.92998	8.09276	7.84266	7.88926	7.84435	7.87053	7.84218	7.84499	7.8677	7.91875	7.86023	7.85663	7.86648	7.92541	7.84814	7.84824	7.86364	7.86799	7.8388	7.95404	7.90628	7.86303	7.85791	7.82463	7.86828	7.85388	7.86431	7.87715	7.88095	8.25947	7.89718	7.85586
ACN9	10.1766	9.38098	9.83085	7.89713	9.27296	9.95413	7.92786	7.87155	9.66686	9.31634	7.9092	10.108	8.71258	9.27882	10.0767	10.0314	11.4135	9.27156	8.41819	7.90141	9.11056	9.18586	8.60612	9.92627	9.90614	9.06283	10.2804	9.76037	10.0864	10.1849	10.2299	8.00713	9.23431	10.0486	9.26963	9.50717	8.6632
ACO1	12.4828	11.4589	12.1258	10.6143	11.6828	12.1717	11.8641	12.7368	11.8186	11.6995	12.1292	11.7398	11.6995	13.8197	11.2924	12.0256	12.8948	12.5439	10.8471	10.0381	10.714	11.3868	13.6137	12.0319	11.0584	12.2559	11.8886	11.6523	11.487	12.6195	12.3118	9.85064	12.1419	11.5991	11.8668	12.0187	10.9703
ACO2	8.51458	8.80417	8.40977	7.88567	10.7781	8.88244	7.86634	7.85224	8.60726	8.09695	7.85964	7.90928	7.88303	8.28923	9.61179	9.22218	8.01709	8.43931	7.94723	8.71056	9.5221	7.91075	7.90736	7.91017	7.94705	7.85039	7.90394	8.93317	9.86681	9.12917	9.04164	8.76752	8.50668	7.97919	8.78965	9.63067	7.99045
ACOT1	8.47241	7.95203	7.95178	8.09258	8.54505	8.52774	9.34009	9.43879	7.88978	8.68734	11.201	8.3747	9.66631	8.05139	8.0099	8.11781	8.56392	7.9107	11.1603	8.3751	8.18849	8.51506	10.0536	7.91744	8.26787	9.35176	8.01404	7.88635	8.00561	8.27307	8.40421	8.5865	7.91543	8.20169	8.38439	7.93442	8.02297
ACOT11	10.0212	10.2337	9.66537	10.0288	11.0671	11.2378	11.5332	8.86665	9.73285	10.2251	8.35136	10.0393	10.4353	9.61105	10.3164	9.79063	8.28014	9.50042	9.97045	8.35125	8.88966	9.14524	9.43218	9.9564	8.59288	10.5908	9.92813	9.84438	9.62397	10.9049	9.6185	8.71207	9.92663	10.2773	9.58964	9.759	8.00867
ACOT12	7.91987	7.91171	7.8613	8.18737	7.88005	7.91595	9.24339	12.0175	8.23596	10.3623	7.94674	7.8904	7.9186	7.84424	7.90136	7.86918	8.0238	7.90871	7.93916	10.9671	7.89143	12.842	8.1615	7.91488	8.09183	7.94914	7.90394	7.91798	8.175	7.88493	8.00427	12.9283	7.9175	8.1438	7.90286	7.90528	12.3547
ACOT2	8.14749	8.05855	7.95458	8.86641	10.2045	7.95988	8.09863	7.97043	7.91851	8.30095	7.93559	8.62695	8.73581	7.88362	7.90736	8.67237	7.97237	8.04236	7.89777	7.85327	8.0077	8.1923	9.20507	7.99354	9.25976	8.35315	8.35712	8.07499	7.92037	8.86941	8.06893	7.86357	7.89486	8.38831	7.96606	7.92629	7.94202
ACOT4	9.73948	7.91273	8.43478	8.26704	7.91512	7.88562	7.92735	7.92595	8.20253	7.89221	8.5734	7.80757	7.90003	7.94266	9.17282	8.91631	7.82233	8.88626	7.89556	7.85613	8.15391	7.85392	7.84387	7.88427	7.91112	7.92504	8.88611	9.57474	9.48505	9.35572	8.39068	7.9139	9.06556	7.87868	8.80312	7.94266	7.88113
ACOT6	7.89681	7.94021	7.85113	8.13402	7.89144	8.89028	7.94968	7.92595	7.87579	8.20516	7.89425	7.85509	7.86979	8.10988	7.89644	7.85717	7.96138	7.91204	7.91762	7.91698	7.82362	7.89469	8.11562	7.84272	7.99505	7.86041	7.9004	7.85158	7.87451	7.81117	7.83885	7.88381	7.87097	7.88912	7.88563	7.87391	7.83694
ACOT7	8.96938	8.78653	8.26538	9.76108	8.76271	8.48332	8.86681	8.53477	8.46161	8.46403	8.58705	8.61393	8.36263	8.48879	8.48493	8.57058	8.32758	8.27421	8.74323	8.09425	8.48542	8.36684	8.77058	8.49984	8.32903	8.51229	8.52443	8.2957	8.34441	8.64879	8.42589	8.25504	8.56062	8.4275	8.22315	8.38951	8.4743
ACOT8	7.85238	8.79008	8.36388	7.99936	7.8275	8.86452	7.92007	7.84753	7.83544	11.3679	7.88004	7.87499	8.62764	7.87415	7.8429	7.84689	7.8969	8.45157	7.86549	7.84682	8.57823	9.49913	7.85803	8.6307	7.86524	7.93117	9.39676	7.86055	10.324	7.87715	7.86902	7.82735	7.88564	7.84628	8.19763	8.56655	8.14501
ACOT9	8.95404	8.51725	9.50831	8.14741	11.0347	9.61069	10.4111	8.41481	8.91913	9.43954	9.77205	9.33117	8.37515	9.61497	8.85565	9.52147	9.54525	9.40372	9.6793	8.0823	9.43689	9.04495	9.00173	9.83671	9.85649	8.93075	9.82963	8.6522	8.92578	9.83901	8.8495	8.58046	9.40113	9.02941	9.47866	9.09843	9.88722
ACOX1	7.94655	8.00029	7.86873	7.87868	7.86139	8.21718	8.02437	7.90378	7.99239	7.93445	7.85643	7.84962	8.22311	8.19677	7.88843	7.86428	7.87169	8.13162	7.98865	7.84412	8.07072	7.88666	7.8753	7.86084	7.87961	8.1423	8.37462	7.90194	7.83915	7.86665	7.85123	7.87303	7.85141	7.86706	7.93541	7.901	8.82459
ACOX2	7.86306	10.2743	9.82766	7.89124	7.90446	7.9001	7.90804	7.84461	10.9937	7.89221	10.7176	9.01322	8.00312	9.18421	8.30993	8.17697	7.87052	9.52153	7.89052	7.91094	7.95045	7.85215	7.863	10.4623	7.85339	7.88977	10.0567	10.3549	7.92978	11.7496	10.0322	7.8869	9.76238	7.85981	9.41199	8.97547	7.89122
ACOX3	7.89808	7.86902	7.92818	7.95853	7.93542	7.8848	7.9765	7.9004	7.84111	7.92005	7.90464	7.87499	7.85591	7.84815	7.85787	7.86834	7.88976	7.88867	8.02238	7.90829	7.94152	7.86458	7.84756	7.90347	7.87705	7.86983	7.88676	7.88976	7.97694	7.89873	7.93175	7.8884	7.87367	7.94067	7.88838	7.93036	7.87847
ACOXL	8.09824	7.84756	7.85769	8.50476	8.10026	7.87992	11.4181	7.87995	7.83121	7.94993	7.86141	7.85882	7.90312	8.02311	7.85484	7.85487	7.89962	7.8832	7.85666	7.85208	7.84914	7.94415	8.05978	7.85903	8.09944	7.85039	7.90394	7.89813	7.87953	7.86828	7.923	7.90594	7.85489	7.84869	7.84346	7.86634	11.2602
ACP1	8.37137	9.50184	9.5438	9.43134	9.90909	9.68505	7.99061	8.47403	9.5156	8.39679	8.45568	9.68044	9.575	8.18855	8.24431	8.76178	8.156	8.56179	9.05184	10.6416	11.9952	8.14433	8.95511	8.57665	8.44527	9.08193	8.15428	9.52657	9.43762	8.85332	8.80757	11.7346	9.41506	8.64673	8.07021	8.59883	7.98828
ACP2	8.3431	8.11207	9.6652	8.68876	11.3504	10.4208	8.12898	8.71007	9.41792	8.04421	11.5629	9.16318	9.63897	10.6868	10.5467	10.6289	9.11543	10.4051	7.95263	7.87622	8.79853	9.23906	12.9474	10.0205	8.23914	9.26583	10.7611	9.48031	10.3901	9.72546	10.0416	8.12959	8.17106	11.035	9.91782	7.98758	10.8452
ACP5	11.4318	10.056	7.87201	7.85691	8.19696	11.5573	7.99592	7.89832	8.16516	7.83617	7.87053	7.91299	10.6036	8.93021	7.84731	8.5842	7.93956	10.4006	8.2006	7.89832	7.88562	7.8667	7.83619	7.87995	7.88311	9.88053	9.77893	12.4868	7.87338	8.23471	7.87819	7.93404	9.73711	12.0972	7.83827	11.0246	7.88182
ACP6	8.07535	9.88184	10.5274	8.53498	7.98643	7.93517	7.93542	7.92595	9.59288	7.92005	8.93707	7.98565	10.0062	7.89033	7.92446	7.89935	8.12549	9.80512	9.41077	10.0338	11.8202	7.97784	8.14529	8.03377	7.97744	9.81698	7.95588	7.91853	7.99359	8.34588	8.16062	9.48227	10.4543	8.07572	10.5123	9.33776	8.36473
ACPL2	7.91916	7.88638	7.87198	7.9017	7.90102	7.93579	9.48602	9.39163	8.04531	7.96415	10.7141	8.07488	7.91008	8.44476	7.85458	7.88363	7.96415	7.87131	9.43776	7.94923	8.36266	7.88089	8.02953	9.17667	7.90536	7.94484	9.27293	7.86368	7.89624	7.87505	7.8798	7.96832	9.13534	8.37078	8.06507	7.8904	8.00149
ACPP	7.99456	7.87659	7.85714	8.50476	7.95346	7.9462	7.91061	8.44004	7.87624	10.1908	9.34734	7.85936	9.33621	7.85661	7.93855	7.8294	7.90347	7.81528	7.84345	8.1678	8.36183	11.8051	8.41204	7.86804	8.13826	9.12178	7.8874	7.85485	8.39731	7.89511	7.86902	7.92888	7.89292	7.9067	8.00542	7.89718	11.4866
ACPT	10.8776	8.14719	7.97534	9.49831	8.66408	8.11705	9.17136	9.2656	7.92797	8.73565	9.31712	8.46979	8.02072	8.11148	8.66922	8.15258	8.98267	8.07953	8.14019	8.71475	7.9235	8.41404	8.98159	8.01325	9.11664	7.92161	8.21083	7.93876	8.45224	8.09717	7.93426	7.91544	8.06754	8.83275	7.98014	8.02703	8.54575
ACR	8.14572	7.89769	8.04268	14.6317	7.91512	9.95295	10.8052	10.6468	7.91074	8.33593	7.94343	7.9527	8.11452	8.11862	8.19794	7.95709	9.52846	7.98012	14.6339	9.17282	7.97328	9.20407	8.8311	8.08011	9.89265	14.6966	8.55241	8.13526	8.76674	8.73164	8.9704	9.24369	8.17299	8.80327	7.96122	9.13525	8.76971
ACRBP	7.88647	8.9049	9.07463	8.08553	7.89988	7.89828	10.5156	10.6017	7.86183	7.88274	8.1946	7.90187	7.86728	7.86365	7.84596	7.84952	7.87992	7.9467	14.2297	7.87622	7.90412	7.90387	7.88303	7.9095	7.91112	7.98434	7.92039	7.89034	7.92233	8.38568	8.92008	9.14921	7.89392	7.85046	7.88264	7.89263	7.94557
ACRC	9.567	11.565	9.00518	11.2087	9.96926	8.40321	11.1531	10.9395	10.6806	9.74363	10.6253	9.51356	8.99166	10.783	10.4371	9.83481	10.6496	9.00881	14.1234	10.481	8.17665	9.60317	10.6507	11.1481	11.0633	8.87316	10.1199	10.0814	9.50639	9.75044	10.0036	9.39599	9.84506	9.67846	10.1239	10.6981	13.4957
ACRV1	8.30663	9.4633	7.88374	8.79274	7.86308	10.1145	7.96147	7.99923	8.28394	8.35346	14.2874	8.31373	7.89119	7.9005	8.0237	9.68572	8.42464	9.43951	8.73328	11.8753	7.89356	8.78259	11.7832	7.95637	8.26533	8.13972	8.17407	8.00941	8.3784	8.22712	8.25708	13.7567	9.20895	8.13789	8.39481	7.91081	8.41692
ACSBG1	8.93327	7.94021	9.07229	10.5882	9.4442	8.5888	9.60052	9.24169	8.52389	9.38458	14.2445	8.89773	9.91379	8.40995	8.43252	8.11105	8.73894	8.06391	12.3536	13.0349	7.95373	9.32665	12.0992	8.11942	9.43404	9.78737	8.3213	8.10275	8.73468	8.29929	8.56034	14.071	8.26536	9.15283	7.98064	9.1452	12.0121
ACSBG2	8.39418	7.92233	7.94515	13.8677	8.98823	7.99211	7.89653	8.06625	7.8668	8.52172	8.15517	8.10885	7.94915	8.41885	8.16046	7.9492	7.91629	8.08167	8.29658	8.66607	8.05753	8.21302	8.14529	7.99388	9.27593	7.89363	8.23963	7.9593	8.49263	10.2694	8.07189	7.98758	8.06534	7.89403	7.96566	8.00494	8.15578
ACSF2	9.97327	8.51364	8.19196	9.03155	8.33716	8.8472	7.87132	7.97376	8.51095	7.82283	8.25639	8.04322	7.84914	7.88753	7.88407	8.8174	7.87326	8.37542	7.87073	7.87293	8.42173	7.91469	7.9557	8.64184	8.01035	8.18925	7.88368	8.89886	8.11581	9.1757	7.8313	7.88381	8.87254	7.89879	8.7038	9.02008	7.8801
ACSF3	7.86471	7.90995	8.91833	8.87534	8.19696	7.87437	10.3491	7.90828	7.87579	8.16266	7.95797	7.88912	7.89004	8.06798	7.9477	7.97858	8.33683	7.83154	8.29658	11.6333	8.26396	8.11994	8.00338	7.87825	8.06803	8.30753	7.96843	8.98117	7.93301	7.91648	8.13311	12.999	7.95774	8.16167	8.09622	9.10551	7.9067
ACSL1	8.39418	8.53717	7.90446	8.36657	8.35632	8.05299	8.54584	7.92921	8.13834	8.11529	9.92026	9.62075	7.9186	7.94695	8.27989	8.48296	9.29475	8.26254	8.12775	7.87454	8.12297	7.98764	7.87624	8.60159	7.95045	7.91915	8.03432	8.304	7.88666	7.93916	8.60409	7.88312	7.91103	9.8367	8.08424	8.24555	8.10548
ACSL3	9.19298	9.02052	8.85354	8.07272	8.55703	8.53042	8.39064	8.9284	9.40348	8.94184	8.21789	8.55552	7.94197	8.50327	9.86618	9.15359	8.52028	9.54551	8.02215	9.74999	9.79269	9.50496	8.66431	8.99876	8.19856	7.92462	8.77891	9.70706	8.34751	8.87256	8.21488	10.3713	8.89372	8.74456	8.87686	9.48622	8.16932
ACSL4	8.41275	8.42425	8.11809	8.55396	8.19427	8.08734	8.64103	8.2278	8.12853	8.58794	8.71052	8.26416	8.14324	8.67417	8.68687	8.388	8.33854	8.08722	8.53348	8.22507	8.55465	8.84698	8.33413	8.19734	8.20529	8.08888	8.81637	8.26495	7.96957	8.40629	8.31119	8.15398	8.28023	8.75428	8.27815	8.37233	8.74867
ACSL5	8.03021	9.39255	9.13509	8.39713	8.91592	8.88218	8.3885	8.4248	8.83038	8.58157	8.56124	8.90884	9.67104	8.99334	8.89081	9.63987	9.34379	9.26544	9.56215	7.86795	8.61702	9.20824	8.41265	8.61856	9.18895	9.37115	9.13012	9.33177	8.94161	8.78549	8.96519	8.25264	8.73292	9.18238	9.33387	9.24533	7.88161
ACSL6	7.97246	7.87332	7.90866	9.09199	7.96689	8.31483	7.99031	8.3808	7.9724	8.27865	9.40943	8.12457	7.92448	8.41598	8.16419	7.95981	7.98687	7.91325	8.71163	8.45813	7.86082	8.40351	8.10848	8.27272	8.4151	7.93131	8.51879	7.88044	8.04617	7.8827	8.26175	8.32765	7.93029	8.08785	8.06465	7.90133	9.26262
ACSM1	7.87137	7.80755	7.87734	7.85344	7.93542	7.85478	7.90306	7.90828	7.83265	7.89221	7.86396	7.83537	7.84867	7.89793	7.84946	7.84689	7.87632	7.8579	8.0352	7.90829	7.85449	7.86083	7.88031	7.84238	7.84805	7.84533	7.89125	7.86208	7.92233	7.85655	7.85829	7.85759	7.84717	7.86933	7.8629	7.8619	7.88405
ACSM2B	8.06618	7.95119	7.93296	8.12297	8.15071	7.95366	9.31312	8.77428	7.86587	8.07887	8.44635	8.15603	8.55401	8.90395	8.01357	7.93051	8.56533	7.91697	11.0943	9.88826	7.90585	8.29562	8.46192	7.9262	8.86043	8.48489	8.17408	7.95647	8.21854	8.09528	8.73586	10.1471	8.00567	8.39849	7.90724	7.96955	9.66302
ACSM3	8.23066	8.10414	7.90744	8.30057	8.39787	8.65731	8.2811	8.13879	8.20938	8.2183	8.17542	8.04034	7.98893	8.16476	8.06707	7.98497	8.07704	8.29579	9.25624	9.5056	8.01133	8.00531	8.27111	7.94328	8.36569	8.09027	7.9556	8.02558	8.49093	8.0182	8.38052	9.66256	7.906	8.02765	7.91247	7.92611	9.77744
ACSM5	10.1717	8.21164	8.07264	8.87534	8.47891	8.08922	10.0744	9.76004	7.95466	9.38678	9.76733	8.74706	8.88632	9.5449	8.6878	8.29165	9.30078	8.10743	13.1409	8.91983	7.91988	8.89307	9.3804	7.95976	9.83789	8.86325	8.25537	8.10532	8.2796	8.24987	8.60762	8.23445	8.19245	9.3761	8.10365	8.11783	9.08756
ACSS1	8.18877	10.0201	9.81274	8.0127	8.16037	10.0122	7.99592	7.8786	9.93725	7.77495	8.5899	8.19438	10.2788	7.87255	8.12085	8.26204	7.98931	9.85265	7.96534	7.87454	8.22733	9.15585	7.897	9.37038	7.85246	9.68776	7.9111	9.52732	7.91593	8.56752	7.92098	7.8884	9.36463	7.97636	9.45266	9.36008	7.83113
ACSS2	11.2546	10.8778	10.5535	10.0155	11.8776	10.9505	11.2052	11.105	10.5589	11.0931	10.8018	10.7838	10.8806	11.0005	11.2057	11.0016	11.2301	10.5819	10.6899	10.9221	9.96709	10.8195	10.6391	10.5222	10.9716	10.8222	11.2286	10.9142	11.1472	11.1368	11.0122	8.94444	10.7157	10.8468	10.8212	10.8364	9.31988
ACSS3	9.29642	8.14077	8.13348	7.88929	9.55864	8.2914	9.39199	9.62558	7.99897	9.2005	9.92698	9.0942	8.08789	9.47445	8.90787	8.34636	9.72174	8.14989	8.38549	8.09127	7.94452	8.80466	9.24195	8.18587	10.6403	8.00704	8.55093	8.14525	8.618	8.33786	8.24999	7.90492	8.17759	9.22237	8.05274	8.19123	8.15901
ACTA1	7.95484	9.80512	7.92529	10.0605	12.6263	8.01003	12.2897	14.7201	7.87995	8.19253	8.3182	7.92939	7.89004	11.4099	14.6301	14.3412	7.8836	7.90446	9.15918	10.1542	8.18149	7.93093	8.30131	7.88976	8.50183	8.10359	12.1607	15.2955	7.96176	7.95296	7.93993	7.98455	7.97705	9.05614	7.88475	13.4274	14.2776
ACTA2	13.0297	14.7823	14.925	12.1154	14.0183	14.6356	12.7279	13.9658	14.8316	14.0183	12.3286	13.8778	14.5316	14.9942	14.3276	14.6156	15.1395	15.0474	11.862	13.7272	11.6306	14.4762	14.8159	14.9099	11.4417	14.0023	13.7301	14.7575	14.8959	14.0917	14.7883	10.5622	14.3495	14.7057	14.935	14.5444	12.828
ACTB	12.7974	12.7555	13.6363	11.3299	12.4547	12.9378	13.0405	12.4792	14.0936	12.0561	11.6336	13.4416	12.6384	13.1551	12.5162	13.2702	12.9571	13.9759	11.0906	11.7378	14.5941	12.5486	13.5897	13.6662	11.8961	12.977	12.5647	14.0195	12.724	12.9044	12.1567	11.4757	13.7152	13.3288	13.4038	13.8448	10.5017
ACTBL2	7.91061	7.87208	7.9058	7.9227	8.25709	7.90106	7.90057	8.66167	7.89429	9.68506	7.90464	7.94636	7.85929	7.91728	7.95977	8.10287	8.21672	7.91664	7.8756	9.81526	7.86366	11.1029	8.08259	7.86758	7.97197	7.88812	7.9004	7.89403	7.88429	7.87953	7.86784	10.9974	7.84914	7.87659	7.8693	7.91267	7.88113
ACTC1	7.90564	7.87293	7.88976	7.80211	8.37567	7.89828	8.11676	7.87738	7.83311	7.9062	7.85783	10.2312	7.86728	7.85661	9.78823	9.00494	8.04297	7.84948	7.88272	8.06725	9.00192	7.90212	8.15311	8.22466	7.88936	8.1957	7.90394	9.5542	10.2184	7.8655	7.86629	7.97355	7.92504	7.82612	7.87891	9.00113	7.91761
ACTG1	11.0564	11.0438	11.558	10.7962	11.9875	11.572	11.3613	12.4543	11.365	8.51333	10.931	11.5007	10.811	11.8662	9.86681	11.1488	11.9129	11.5676	10.5753	10.6843	10.8281	9.27913	10.8299	11.4915	12.5076	11.4085	11.3758	11.633	12.41	11.2334	10.6329	11.2683	11.8138	11.1862	11.8132	11.6432	10.8361
ACTG2	12.8787	13.6337	14.4966	12.5185	14.8183	14.1588	12.8429	14.7519	13.3347	14.7911	14.0792	13.4001	14.0023	14.7426	14.4275	14.8019	14.8159	14.202	11.4933	11.5019	13.0215	14.6375	14.582	14.4523	13.5034	14.3495	14.0193	13.1188	14.8871	12.3251	13.9838	10.4455	13.8612	14.3995	14.9531	14.2035	14.3193
ACTL6A	10.0223	10.1628	10.1943	9.83374	11.1161	10.8435	7.92886	9.26647	10.2446	8.1177	9.01673	9.74253	9.37175	9.95468	10.2362	9.83824	9.43158	10.2531	9.78891	10.1872	11.7126	8.61279	10.1658	10.4045	9.09423	9.29302	10.4535	9.83115	10.5437	10.307	10.8034	9.73535	10.7835	9.68461	9.39293	9.81706	10.4591
ACTL6B	8.0936	10.1518	9.74137	7.88756	8.70062	7.91698	8.60842	7.83274	7.89686	13.0608	7.97784	7.94291	10.4303	7.85528	7.91634	7.87044	7.99518	9.29388	8.2006	7.89832	7.94723	10.0931	7.9557	8.01663	8.76461	10.0864	8.06422	7.97526	8.43841	8.1905	8.05826	8.09023	7.92661	8.18377	9.26661	7.95446	8.27564
ACTL7A	7.90726	7.88384	7.92597	8.87534	7.95346	7.89748	7.87253	7.99565	7.86017	8.2152	7.89425	7.93455	7.85929	8.3167	8.11635	7.90431	7.88881	7.8579	7.95554	8.57327	7.84498	8.00692	8.55434	7.88883	8.48315	7.90388	7.90306	7.81677	7.89478	7.88559	7.86962	7.89559	7.89179	8.05331	7.874	7.90141	8.26941
ACTL7B	7.86471	7.86228	7.86656	8.14689	7.87828	7.84152	7.88513	7.82004	7.88272	7.86545	7.91075	7.86538	7.91728	8.48126	7.93994	7.87293	7.89087	7.83674	8.81771	7.82647	7.8572	7.88396	7.89109	7.84672	9.24007	7.88166	7.90686	7.88034	7.84962	7.87187	7.82909	7.95025	7.84386	7.83727	7.84577	7.87338	7.87414
ACTL8	8.681	8.05664	7.94214	7.92662	8.97481	8.78748	9.76861	8.10295	8.03711	8.20516	9.72441	8.39469	8.01462	7.90896	8.52018	8.14496	8.64135	7.96979	7.90878	7.90559	8.68465	8.48462	8.45544	8.03564	8.93386	7.94531	8.0054	7.98641	8.94015	8.11559	8.06037	8.07639	8.07792	8.56898	7.92593	8.40531	8.45145
ACTN1	15.9636	15.8101	15.9044	15.082	15.9044	15.8602	15.7003	15.2006	15.8602	15.8602	15.4313	15.9044	15.8602	15.8101	15.9044	15.9636	15.8602	15.7704	12.0864	14.6053	15.8602	15.3088	15.8602	15.9044	15.8602	15.0957	15.9636	15.9044	15.3172	15.8602	15.8602	11.4169	15.8602	15.9044	15.9044	15.6741	15.2955
ACTN2	7.90105	7.9042	7.87071	7.96433	8.35632	7.87654	7.83879	7.93255	7.86522	7.89863	7.86396	7.82892	8.13989	7.83132	7.89644	9.04126	7.91265	7.84905	7.90263	7.8897	7.82957	7.86458	7.84945	7.85803	7.86524	7.88166	7.82577	9.31379	7.83752	7.85873	7.86962	7.86108	7.85979	7.88479	7.89183	9.0103	10.1453
ACTN3	8.5966	9.53495	7.92735	8.15975	7.88316	8.09547	8.06639	8.74266	8.34791	8.37299	8.89097	8.09282	7.93827	9.5449	8.20938	8.34973	9.20063	8.00518	7.91401	7.88272	7.89329	7.95656	8.1615	7.91884	9.25324	7.79869	10.1455	10.4648	7.92454	8.03073	7.91562	7.86628	7.91441	8.15564	7.92647	9.13699	7.86647
ACTN4	13.5607	14.1361	14.2001	11.9546	13.8212	13.9473	12.7005	13.9967	14.1523	14.0096	12.0167	14.4721	13.6834	14.595	14.0546	14.1265	14.1865	14.4292	11.4823	13.25	13.2277	14.1234	13.9765	14.3063	10.9396	13.4922	13.6011	14.2535	14.5468	13.8197	13.7668	14.2833	14.3039	14.5316	14.4198	14.2923	13.6221
ACTR10	9.96208	8.20855	8.39405	11.0774	10.4841	8.22542	7.93958	8.37925	8.2077	11.1004	9.26773	9.15157	8.32039	8.18993	9.30387	8.641	9.45993	8.61383	7.87939	7.85208	9.11734	10.4614	8.73305	8.38317	9.40209	8.18925	9.09733	8.47814	7.94774	9.06844	8.72522	8.19831	9.00532	8.63591	8.2366	8.11325	8.37615
ACTR1A	13.8519	13.7904	12.6883	11.9834	13.7272	14.1283	14.0023	13.3228	12.2336	13.4156	12.5919	13.3405	14.0435	13.4113	13.4966	13.9848	13.1737	12.9871	11.6361	10.8005	10.269	12.0501	13.0782	13.2698	13.5147	14.2885	13.9889	12.7354	12.9948	13.6547	13.9473	10.2265	13.3902	13.2986	13.6346	13.3072	10.4395
ACTR1B	12.731	12.2392	12.7652	10.0451	13.4519	11.2858	8.21928	7.92297	11.7249	14.1797	7.93115	9.39012	7.86874	8.81228	13.1097	13.8999	9.17324	11.5948	9.07147	8.22971	13.9514	10.1111	7.84387	11.342	7.90339	7.83845	9.23256	11.0893	12.1961	11.356	10.4889	10.2036	13.8572	7.94575	11.7342	11.6489	7.87689
ACTR2	11.1457	11.2737	10.8569	13.2738	12.1523	11.2057	10.2897	12.2467	10.3131	11.7779	11.4802	10.7946	10.9505	12.2386	11.4952	11.0827	11.9442	10.8849	10.7877	10.1959	9.6039	10.1103	12.8243	11.0414	9.80545	12.392	11.5901	10.6981	12.7354	11.2671	11.6117	10.0396	11.0771	11.0055	11.0389	10.9647	10.1047
ACTR3	10.9756	12.0012	11.2597	8.02732	10.7341	11.7411	9.74726	10.622	11.4032	11.6963	10.8211	11.6523	10.3123	11.2858	10.6588	11.4882	11.5371	11.9014	10.4937	10.9348	10.5421	10.6672	12.5512	12.0245	12.307	11.3734	11.6969	12.0002	10.9095	11.2788	11.572	11.0607	10.6599	11.1895	11.7173	12.0319	10.2816
ACTR3B	9.54594	8.02248	8.33183	8.59989	7.9042	8.5725	7.95076	8.2682	8.02927	7.95847	7.85488	7.88737	8.77822	8.80842	9.01091	8.65577	7.91603	7.96718	8.62063	8.39753	8.49968	8.03886	8.00577	8.13069	7.97206	8.78048	9.3325	8.12422	8.51527	8.31298	8.69395	7.92422	8.60478	7.92823	8.23535	7.98592	7.89212
ACTR5	9.01411	9.63979	9.28278	9.30015	8.70062	9.48005	8.57754	9.41873	9.20187	11.2674	10.2692	10.0747	8.74936	9.29106	8.58964	9.43353	9.1383	8.88165	8.46394	9.7364	8.90259	9.73761	9.46129	9.48593	9.60023	9.1962	8.38076	9.44385	8.96598	9.18697	9.6652	8.75061	9.19274	9.08446	9.5874	9.09119	9.0904
ACTR6	12.0403	12.3366	11.6236	8.59638	7.92437	11.7113	8.389	9.49173	12.8235	7.95299	7.93411	9.62399	7.88875	7.82859	7.89281	12.542	13.6875	12.3842	9.46543	8.10259	12.6079	7.8779	7.88956	12.7758	7.98272	7.89757	7.87536	12.5172	12.0392	11.3477	11.8072	9.80473	12.7748	12.0256	12.0937	11.789	12.954
ACTR8	8.47137	8.55258	8.22305	7.86297	9.06548	8.01247	7.86762	8.35743	7.85484	7.93681	8.24081	8.04322	8.36516	8.18	7.96173	8.64687	8.24789	8.33841	7.85334	7.94491	8.57457	7.86178	7.89405	7.9438	8.63986	8.10359	7.95588	8.50121	7.8712	7.94891	8.50678	7.86628	7.95687	7.98207	8.16106	8.39727	9.82534
ACTRT1	9.59035	8.37799	8.1598	10.6717	9.75029	8.44283	10.6075	10.5078	8.01032	9.54213	10.4085	9.24169	8.15688	10.3023	8.96092	8.41977	10.4793	8.17153	9.77562	9.06157	8.00518	9.01427	9.93917	8.19937	10.2371	8.17133	8.67119	8.15188	9.34847	8.56228	8.26224	8.10541	8.43703	9.5874	8.11483	8.26593	8.85238
ACTRT2	7.8531	7.82949	7.89486	7.78217	7.90695	7.82128	7.87531	7.86573	7.82607	7.84862	7.82423	7.84372	10.483	7.83548	7.90709	7.94723	7.90931	7.83931	7.85523	7.87454	7.82511	7.82707	7.86013	7.83421	7.86235	9.60946	7.8592	7.84475	7.85139	7.83086	7.84063	7.835	7.85729	7.86628	7.79987	7.77934	7.85037
ACVR1	12.8691	9.79449	10.9857	7.86952	7.90446	10.6871	14.1827	9.45458	12.1735	8.08018	8.02705	10.9853	9.85336	7.86939	10.8965	11.0731	8.6992	12.2336	10.1597	8.05419	9.73442	7.91664	9.43332	11.3889	7.92833	10.0122	7.85978	12.0207	11.3016	11.6125	11.0009	8.27944	9.52657	11.2782	11.2135	11.5139	7.89558
ACVR1B	8.68189	8.31772	8.27984	8.21266	8.9642	8.1385	8.81124	9.00924	8.38803	8.55385	8.79913	8.44685	8.18434	8.65052	8.36342	8.35952	9.01288	8.36003	8.11346	8.51087	8.27506	8.47564	8.91203	8.22097	9.06748	8.05094	8.47351	8.04632	8.74511	8.21238	8.0688	8.09528	8.16987	8.71718	8.50045	8.43941	9.17192
ACVR1C	7.96366	8.53125	7.88846	9.57596	7.86959	8.13788	9.17235	7.9004	8.08355	8.18054	8.73072	7.90928	8.17993	9.5286	7.93563	7.92178	7.93956	8.23801	8.09901	8.31456	7.91595	7.9635	7.9557	7.94671	8.08382	7.93767	7.99941	8.00915	8.59145	8.03264	7.90146	7.96234	7.94643	8.79741	7.9084	7.92416	7.91761
ACVR2A	8.12302	7.95486	8.12082	8.41706	8.61625	7.9945	8.17505	9.16827	8.53308	8.56509	8.18041	8.02671	7.92014	8.01682	8.05449	8.02071	8.63914	8.3406	8.08205	8.05591	8.57264	7.9113	8.10978	7.93155	8.6194	8.06052	8.17666	8.20764	8.02683	7.93068	7.87413	7.88791	7.99876	9.21323	7.98388	8.27197	8.00395
ACVR2B	7.95222	7.87659	7.86083	7.89975	8.06761	8.69827	7.8832	7.87621	8.08388	7.93889	7.87733	7.84946	8.41477	7.89553	7.86682	7.86628	8.0238	8.23231	7.90263	8.29157	8.04656	7.90725	7.9227	7.85128	7.8454	8.23697	7.88584	8.6389	7.84792	7.87187	7.81094	7.91478	7.87043	7.90576	7.80871	7.86714	7.83572
ACVRL1	10.254	11.055	10.927	10.582	12.9303	10.7742	9.96309	10.8202	11.3408	9.35608	9.97115	10.5841	11.6377	11.1867	11.8501	11.727	11.0913	11.9266	9.54575	11.8405	8.35071	11.0755	11.0863	11.3371	8.59191	10.9734	10.8412	10.9789	10.8363	10.968	10.8877	13.6648	12.419	11.7753	11.4518	12.2236	10.1468
ACY1	7.85875	7.89857	7.83803	7.84386	7.84121	10.1266	7.80502	7.87367	9.07807	7.88973	8.01633	8.11477	7.84711	7.82418	7.83352	7.93878	7.83937	7.87443	7.87224	8.07973	11.355	7.86458	7.86892	9.27223	7.83202	7.8321	7.85585	9.19295	7.91593	7.87953	7.86465	9.37754	8.76379	7.85527	7.835	7.82613	7.84154
ACY3	7.92541	7.85613	7.88387	7.88396	7.92437	7.85204	7.87132	7.83674	8.21833	7.91473	8.15517	7.8685	7.87482	7.85101	7.90828	7.87137	7.88083	7.82693	7.83822	7.89411	7.86133	7.85215	8.07498	7.86157	8.04913	7.85771	7.87989	7.89448	7.91593	7.90042	7.87689	7.84345	7.86416	8.04935	7.88363	7.89334	7.89033
ACYP1	8.35692	8.88866	9.08454	10.9077	8.63994	8.45131	8.61062	8.65822	8.58169	9.6	10.2313	8.66819	8.35693	9.01279	8.88537	8.43716	8.89078	9.18824	9.85863	9.22395	9.93604	9.39241	9.57411	8.90808	8.55247	8.26402	8.31196	8.39444	9.23882	8.6746	8.63097	8.87879	9.51696	8.35607	8.28063	8.2486	8.38547
ACYP2	8.16346	8.76904	8.43672	8.69026	8.65372	9.16589	9.59745	9.23554	8.72021	8.10712	8.3196	8.1958	8.24625	8.65903	9.80822	8.75854	8.74678	8.46928	10.982	11.1036	9.29981	8.49209	8.64886	8.80614	8.24133	8.15724	9.00549	8.55593	10.3419	8.24957	9.34866	11.0469	8.39082	8.32148	8.53695	7.95964	10.9945
ADA	8.40057	7.95068	10.1732	8.97863	8.45742	10.4648	8.80645	8.71007	8.22077	8.30382	10.3028	8.13605	7.94316	8.81228	8.42867	9.89593	9.17324	8.97225	8.12255	9.65682	12.7429	8.15216	9.07209	7.94671	8.98106	8.11491	8.0831	9.23729	8.71584	8.00904	7.94095	9.82884	8.91192	8.19657	7.93091	7.9818	8.5816
ADAD1	7.91385	7.85086	7.8499	7.84386	8.11953	7.86284	7.92333	7.83674	7.86227	7.84435	7.81225	7.8685	7.88583	7.88362	7.81452	7.87044	7.87716	7.88915	7.94452	7.87454	7.82511	7.86178	7.85242	7.83527	7.8952	7.90388	7.84545	7.83974	7.94177	7.89385	7.86305	7.87024	7.87846	7.84323	7.85169	7.88465	7.85641
ADAD2	7.98057	7.90045	7.8872	7.9227	10.3042	7.90312	7.85873	8.53348	7.87089	8.18054	7.96205	7.88403	7.90736	8.22486	7.9477	9.02217	7.97197	7.90309	7.86373	7.94012	7.93737	8.16366	7.88427	7.95727	8.67477	7.85158	9.16861	8.46048	7.8487	7.86664	7.91792	7.93611	7.90684	8.13087	8.20239	8.66885	7.9637
ADAL	9.40794	8.28917	8.18412	9.63047	7.87364	8.39836	7.91677	8.85948	8.42585	8.14384	8.40382	8.09076	8.21376	7.82521	9.0394	8.42585	8.17682	8.22033	7.86725	8.04039	9.14753	9.68112	7.95944	8.36578	8.23914	7.88977	8.36404	8.28614	9.14766	8.56671	8.41032	8.21704	8.68048	8.04039	8.10095	8.21776	8.06383
ADAM10	8.99858	9.86909	8.45071	7.87659	9.32979	9.14542	9.26211	8.91867	8.61378	9.53633	7.86451	10.1876	8.45707	8.69188	8.82552	8.96935	8.72456	9.23591	8.60829	7.92919	9.29647	8.71886	8.32905	8.86033	9.08927	8.6841	8.54177	8.87499	8.62462	8.55034	8.06444	8.21841	9.15076	9.04166	9.21714	9.0465	8.49626
ADAM11	7.83842	10.4905	7.86531	7.89332	7.87667	7.91798	7.88845	8.08476	7.90664	7.87729	7.87401	7.88114	7.92564	7.85941	7.92718	7.81476	8.29386	7.84322	7.92761	8.02799	8.30039	7.91267	9.50256	7.83477	7.86959	7.88007	7.84345	7.88156	8.00713	7.87006	7.87024	8.1418	7.82175	7.95466	7.86851	7.86828	7.88182
ADAM12	9.84001	8.13128	8.67196	9.75198	9.08406	8.72315	8.45794	8.43484	8.15234	8.81674	9.41189	9.58958	8.97941	9.6851	9.22617	9.2344	9.2721	8.81484	8.6916	8.51888	8.09931	8.45291	8.90863	9.06251	8.70971	9.15103	9.22329	8.88677	8.84237	9.72785	8.49004	8.40925	8.16152	9.62198	9.27065	9.17259	9.63836
ADAM15	12.8763	10.2887	10.7322	10.755	11.958	12.4378	10.0569	10.1697	11.1838	11.8459	10.3634	11.8379	11.0284	11.287	11.1545	10.9922	12.0286	10.3862	10.2529	10.5558	11.7017	11.1253	10.8973	10.9739	10.8076	10.8782	10.9589	11.1756	11.1528	11.4874	10.796	9.81748	12.1043	10.1742	10.7511	11.0129	9.75287
ADAM17	13.3614	12.6341	12.1248	10.6363	11.4413	12.9653	11.517	11.3746	11.4598	13.165	9.92184	12.7474	12.1318	11.9514	13.0597	12.7337	12.3937	12.2687	10.0399	10.7626	10.4487	10.3354	11.0146	11.442	9.92738	12.0642	12.9703	12.279	13.2733	12.3291	11.8123	9.4411	12.2666	12.7404	12.2469	12.2891	11.411
ADAM18	7.90408	7.83885	7.87201	7.92662	7.93937	7.91595	8.99405	8.77605	7.90871	7.85291	7.82892	7.87248	8.31769	7.84629	7.90024	7.84286	7.86369	7.87539	7.95263	7.88113	7.84429	7.88037	7.86799	7.83477	7.8614	7.92198	7.88966	7.86548	7.88912	7.84563	7.83813	7.87131	7.86369	7.8668	7.85615	7.82809	7.84631
ADAM19	7.96932	8.51798	8.69768	7.89087	9.7274	8.0634	10.1078	8.15126	8.52958	8.07353	8.44854	7.97331	8.42401	8.33606	7.9168	8.37519	8.42012	9.04509	8.12143	8.0735	7.89835	7.91689	7.99109	7.98643	8.15239	8.28725	8.51593	8.67403	7.91887	8.72115	8.8115	7.99825	8.9466	8.24294	8.83711	8.71991	7.9039
ADAM2	9.37414	7.99343	8.05125	7.98798	8.959	8.10712	7.93147	8.45918	7.98529	8.84081	9.36844	8.73037	8.0817	8.18993	8.56343	8.08437	9.44942	8.05251	8.84445	8.98275	7.93024	8.52764	10.0916	8.07103	9.5676	8.13622	8.46287	8.02058	8.68408	8.22274	8.12606	7.88493	8.15726	8.87709	8.17452	8.08059	7.96175
ADAM20	7.81907	7.80963	7.87925	7.91259	7.85253	8.85566	7.8636	7.83861	7.83078	7.84771	7.83407	7.83441	7.8224	8.17452	7.84596	7.82233	7.9078	7.88083	7.84345	7.81052	7.80883	7.79949	7.83162	7.83527	7.8277	7.82627	7.8712	7.84005	7.84121	9.23087	9.6143	7.82735	7.83399	7.85225	7.80115	7.78396	7.81137
ADAM21	9.23097	8.21368	8.07814	9.13942	9.25339	8.2228	8.15542	9.01615	8.15851	9.47601	8.89097	8.54878	8.03555	9.19284	8.50442	8.17697	8.28432	7.98689	9.43237	7.86678	7.94397	8.75938	9.01873	8.0391	9.15672	7.86041	8.29716	8.0326	7.96176	8.18025	8.08189	7.95709	9.20496	8.81412	7.97126	8.10678	7.95746
ADAM21P	7.84741	7.86526	7.9365	7.84792	7.87364	7.83846	7.87825	7.88713	7.88233	10.6517	8.11564	7.83286	10.4318	7.84424	7.93713	7.84286	7.84771	7.85964	7.86464	7.86409	7.89811	13.6743	7.90207	7.86888	7.87705	9.60946	7.83364	7.86017	7.87575	7.84521	10.1353	7.85983	7.86254	7.8668	7.8531	7.86477	13.26
ADAM22	8.66805	8.61488	8.25834	8.06129	8.79691	8.62659	8.77687	9.33754	8.27314	8.87246	9.5446	8.52314	8.20133	8.9225	9.22727	8.35525	8.0592	8.35393	9.13355	7.94699	8.05129	9.32995	9.35541	8.06931	8.37178	8.44088	9.25117	8.22745	8.98112	8.38387	8.37922	8.14902	8.31451	8.56514	8.37002	8.10569	8.45121
ADAM23	7.92955	7.85884	7.87324	8.47344	7.86959	7.86593	7.90306	8.04386	7.82886	8.19253	7.93115	7.86283	7.88875	7.97589	7.91385	7.89328	7.97197	7.86282	7.84867	7.86995	7.86366	7.91886	7.9557	7.88522	7.94705	7.85771	7.92803	7.84819	8.06084	7.8713	7.87245	7.86962	7.88313	7.95656	7.88977	9.06731	8.08431
ADAM28	8.07902	7.93324	7.92706	9.73662	7.86936	7.88779	7.92989	7.91348	7.94481	8.17634	7.94776	7.90058	7.89549	8.12092	7.93916	7.89168	8.50778	8.06409	9.71812	7.85127	7.85103	7.87687	7.99917	8.11614	8.46384	7.87416	8.49648	8.03353	7.91208	7.91516	8.6061	7.84502	7.86953	9.21167	8.35604	7.89369	7.84926
ADAM29	8.02984	7.971	7.97065	7.84994	7.92096	7.98295	7.88156	7.83942	7.90087	8.12936	8.30286	8.08844	7.88795	7.97985	8.0111	7.93163	8.59717	7.90806	7.89556	7.92449	7.8502	9.09657	7.86892	7.92754	8.02044	7.9087	7.88066	7.9096	7.86908	7.88007	7.87819	7.86224	7.88964	7.94575	7.87695	7.91769	7.87764
ADAM30	7.88995	7.9148	7.90728	7.89332	8.24037	7.9042	8.389	7.85419	8.2933	7.91631	7.96205	7.89576	7.89276	7.89793	7.87204	7.8941	7.87893	7.89001	9.51494	7.90559	7.87976	7.98301	7.97743	7.91439	7.88429	7.85521	7.94114	7.91472	8.00713	7.88348	7.90895	7.99533	7.86607	7.88811	7.86364	7.86477	8.23482
ADAM32	7.94208	7.94318	7.90346	10.4331	8.06612	7.9513	8.74015	8.23586	8.03898	8.0273	8.2065	7.97694	7.90566	7.89614	7.98591	7.89799	8.01985	7.96854	7.97015	8.84262	7.91586	8.10797	8.12629	8.17792	8.3117	7.87266	7.95242	7.89494	8.14494	8.94797	7.95584	9.06706	7.90879	8.0608	7.88331	8.04747	8.48155
ADAM33	8.24034	8.00425	7.98596	8.15096	8.38751	7.96781	8.57433	8.09897	8.21674	8.30329	8.77788	8.27072	9.23983	8.01051	9.91835	7.94579	9.05355	7.9796	8.03169	7.93947	7.91061	8.18979	8.11141	8.73651	8.18401	8.97054	8.27702	7.91683	8.2628	9.18129	9.11663	7.88116	7.94095	8.42907	7.91239	7.91821	7.95671
ADAM3A	7.9594	7.8439	7.89427	7.8775	7.93516	7.83589	8.25714	7.89556	7.85318	7.84439	7.86586	8.20823	7.90914	8.14817	7.95888	7.86276	8.03231	7.84659	8.0395	7.94005	7.86147	7.87837	7.8687	7.88321	7.92119	7.97348	7.98771	7.86244	8.35508	7.8748	7.8742	7.89174	7.85864	7.99166	7.88696	7.88664	8.35978
ADAM5P	7.95222	7.8737	7.84064	7.84689	7.88005	7.87723	7.93147	7.86133	7.87738	7.8345	7.90464	7.87248	7.86301	7.85336	7.88161	7.85717	7.87716	7.85835	7.93916	7.89183	7.837	7.91664	7.86999	7.85857	7.89086	7.86303	7.8449	7.86591	7.88912	7.82128	7.8602	7.89996	7.88122	7.84576	7.86075	7.87862	11.2166
ADAM6	8.94478	8.04393	7.99555	10.2161	8.13872	8.17384	8.45145	8.26829	7.93342	8.83289	7.97202	8.13794	8.00892	8.81805	8.21517	8.10499	9.11543	7.95607	8.12255	7.87778	7.89832	7.90897	8.23557	7.95907	8.20348	7.90388	8.0054	7.86548	7.91151	8.10608	7.93362	7.86846	7.97126	8.56898	7.9561	7.94804	7.87764
ADAM7	9.11411	8.23277	8.11317	8.14689	9.391	8.15037	9.60052	9.31317	7.9678	8.6692	8.5734	8.68868	9.06502	8.84532	8.79484	8.15323	9.39363	8.58597	8.61795	9.06157	7.9477	9.04444	9.66144	8.15423	9.94521	9.1757	8.51458	8.10637	8.7846	8.36609	8.19553	7.97052	8.17608	9.34417	8.01613	8.13168	9.93465
ADAM8	7.86226	9.6462	7.8224	7.87454	7.85917	7.88246	8.28293	7.86228	7.88312	7.8911	7.87861	7.85448	7.846	7.8968	7.8832	7.97251	7.82463	8.53085	7.89183	7.94012	8.14342	8.15839	7.86013	7.85288	7.8685	7.87695	7.92149	9.03213	7.84792	7.91439	7.86367	7.86681	7.87137	7.89143	7.84943	9.63731	7.89122
ADAM9	9.38096	9.43823	9.27102	9.27892	9.37713	9.08031	8.88758	9.5023	8.82167	9.26092	9.86728	9.15157	8.11862	10.3484	8.93386	10.2151	10.272	8.16535	9.69412	9.54667	9.77096	9.25384	9.78147	9.64482	10.272	7.9719	10.2755	8.38968	9.18908	8.51674	10.7764	8.82739	9.56662	9.42	9.40934	9.25017	11.3958
ADAMDEC1	7.92179	8.42763	7.91049	10.7946	7.92158	7.91748	7.95963	7.91565	7.98294	8.02073	8.38049	7.93011	7.9141	8.04248	8.05408	7.95822	7.9847	8.83909	8.03937	8.13222	7.92119	8.25913	8.17321	7.91982	9.02938	7.99783	8.06692	8.22687	8.08051	8.04195	7.97187	7.92699	7.92329	7.88243	7.97984	7.89412	8.01085
ADAMTS1	8.86862	9.07049	9.28838	9.16329	10.8084	8.83227	7.86762	8.14421	9.18041	9.62917	12.9474	9.85136	8.86799	9.45586	10.2922	9.03562	11.6732	8.73383	8.05232	9.39211	9.47231	10.7473	11.3265	9.24538	9.06955	8.86325	9.62253	9.44817	11.2825	9.85033	9.23057	10.5247	9.31924	8.98001	8.3665	8.75562	8.21468
ADAMTS10	8.81852	8.18368	7.97389	8.05762	8.90883	8.11808	8.05208	8.33925	7.98481	8.68688	9.39826	8.35708	8.02116	8.09147	8.27722	8.12446	8.8104	8.04375	7.89556	7.92066	7.90778	8.20522	8.58176	8.04486	9.67536	7.87121	8.23451	7.91359	8.05259	8.18493	7.94372	7.86431	7.97039	8.67223	7.96332	8.08659	9.42749
ADAMTS12	7.85394	7.80821	7.85587	7.85691	7.86324	7.8951	7.94449	8.07535	7.88883	7.84681	7.85875	7.88912	7.84867	8.14595	7.88246	7.87358	7.91265	7.92561	7.87657	7.84287	7.87097	7.84538	7.897	8.82384	7.92833	7.84647	7.88815	7.88912	7.93593	10.007	7.89035	7.88912	7.84152	7.8803	7.86622	7.88652	8.07234
ADAMTS13	8.67606	8.11072	8.0648	9.17967	8.50762	8.15219	8.68621	9.23009	7.94883	8.60871	8.69723	8.54506	8.27169	8.33234	8.51989	8.07741	8.60698	8.01175	9.14521	8.65365	7.91127	8.60775	8.4692	8.09305	8.57097	8.35986	8.30568	7.9988	8.61789	8.2685	8.26805	8.46703	8.17045	8.45604	8.21959	8.00649	8.47908
ADAMTS14	9.93322	7.84002	8.74638	7.88596	7.92098	7.88264	8.18922	7.85029	8.06871	7.87501	7.96334	8.00899	7.84395	7.89205	7.91688	8.00143	7.8465	7.89154	7.8725	7.9387	7.86052	7.89666	7.88133	8.4997	10.4536	7.93789	7.84412	8.65958	7.87397	7.85947	7.86555	7.89544	7.83388	7.93715	9.16159	7.87173	7.95995
ADAMTS15	8.44295	8.07616	7.93052	7.88396	8.29416	7.98717	8.70345	8.1743	7.92007	8.60777	7.95025	7.98915	8.21871	8.26186	9.12451	7.93163	8.35607	7.8632	9.22918	8.88544	7.88317	8.05432	8.38619	7.98743	8.50183	7.93427	7.91571	7.91667	7.90087	8.04678	8.0803	8.04211	7.93937	8.24597	7.91267	7.96043	8.21468
ADAMTS16	9.196	8.21255	8.12684	8.50476	7.95346	8.2295	8.75513	8.6445	7.95171	9.06134	8.385	8.35428	8.07314	8.62783	8.16689	8.23526	8.40876	8.05473	8.5147	8.1678	7.92172	8.52764	8.41204	8.02391	8.84257	7.86041	8.18935	8.03677	8.21238	7.97744	8.12889	7.96013	8.04822	8.72677	7.96416	8.09007	8.00956
ADAMTS17	8.47137	7.89617	7.92818	7.86172	8.50312	7.87353	7.86762	8.06625	8.0978	8.94775	7.90464	7.9539	7.91107	7.83421	7.98434	7.91631	8.09654	7.90309	7.92135	8.91983	7.93855	8.25761	8.28713	8.03254	8.04913	7.91915	8.08874	7.95086	8.53261	7.99786	9.16461	8.00804	9.21285	8.08761	8.2634	8.55141	8.14804
ADAMTS18	10.7283	9.04289	8.34199	8.37307	8.31372	9.93619	10.281	10.2884	10.4926	10.782	9.06773	9.87923	8.56616	11.4182	9.94302	10.4978	8.80917	9.75457	9.51164	9.4516	8.20702	9.20872	9.49807	10.6965	8.87284	8.67877	11.8865	9.40214	10.1185	10.2918	10.6173	9.91119	8.61486	8.30252	8.09324	11.1889	10.8118
ADAMTS19	7.88094	8.50874	7.88583	9.03155	7.93165	7.92528	7.87667	7.97376	7.90735	7.9238	7.85783	7.85621	7.84444	7.87659	7.90231	7.85628	7.88465	7.89813	8.75956	7.88272	7.88268	8.14542	7.83822	7.84867	7.90339	7.85916	7.89575	7.87128	8.66364	7.83878	7.85536	7.90492	7.8535	7.84814	7.81019	7.83885	9.77516
ADAMTS2	8.57588	9.0715	8.57776	9.34487	10.6826	8.02268	8.20346	7.90828	8.8659	10.3726	8.1047	9.99506	8.70776	8.02042	9.36643	8.26939	8.65332	9.19826	9.26517	7.89995	7.97406	12.156	8.97056	8.87509	9.21723	8.4537	8.42109	9.38596	9.83072	9.88208	9.33398	8.10039	9.41275	8.25483	9.38198	8.69032	8.01605
ADAMTS20	7.85123	7.89865	7.88668	7.92371	7.97267	7.87558	8.12971	7.88432	8.1028	7.85392	7.8504	7.85136	7.86329	8.05143	7.92563	7.89976	7.8519	7.84487	7.88111	7.85803	7.84636	7.89364	7.86789	7.83773	7.8951	7.87461	7.87426	7.84506	8.00547	7.86703	7.88043	7.85012	7.84511	7.85341	7.82935	7.88111	9.5514
ADAMTS3	7.8677	8.10463	8.21634	10.2161	7.99555	7.90106	7.89448	9.66537	8.13641	7.86271	7.80026	9.59613	7.82017	7.86523	8.11044	7.95518	8.2572	8.20467	7.87224	7.82928	7.88155	7.85671	7.8272	8.39261	8.12208	7.8526	7.88066	7.88525	7.86588	7.90708	8.60463	7.85983	7.90179	7.97636	7.95404	8.06146	8.07234
ADAMTS4	10.3093	8.17512	9.1124	11.9973	9.31803	9.39085	11.4905	10.4985	8.71621	10.5119	11.0138	8.17599	8.09438	10.9476	9.71852	8.7956	8.1315	7.93681	11.2719	10.7934	8.05608	9.48911	8.42629	9.19913	11.2499	7.8397	9.20818	8.4054	9.99971	9.13087	8.46448	9.80693	8.9158	8.27935	8.8866	9.07274	9.5566
ADAMTS5	7.88409	7.87131	7.89278	7.86952	7.90446	7.84756	8.36197	7.88273	8.31485	7.94738	7.87504	7.85334	8.80511	7.88362	7.87204	7.87784	7.94224	7.87621	7.86901	8.25076	8.9345	8.09736	8.28713	7.92238	7.90146	8.86325	7.9382	7.90246	7.88912	7.88493	7.89686	8.11717	7.96669	7.93634	8.09569	7.91171	8.00221
ADAMTS6	8.49208	9.67859	7.92238	8.59638	7.93542	7.93115	7.87006	7.93916	8.37093	8.57477	13.7343	8.06321	8.8085	7.93861	9.7178	8.98191	8.57856	9.15475	7.88381	7.88794	8.07655	8.37116	11.4045	7.89315	7.88192	8.57457	7.89479	8.53856	7.88429	9.2655	7.91562	7.89084	7.89995	7.91806	9.14851	8.84267	10.6795
ADAMTS7	8.06506	8.37775	8.15298	8.51219	8.02683	7.97121	8.63178	8.83258	7.88699	8.47597	8.7171	8.09833	7.8882	8.30517	8.70193	7.92136	8.54321	7.98141	10.0321	8.07385	7.96434	8.09655	8.25576	8.2597	8.51933	7.90103	8.02852	8.20837	7.98177	8.17502	8.28289	8.20266	7.92324	8.28221	8.43296	8.24908	8.13433
ADAMTS8	8.72677	8.11625	7.93344	8.84823	8.75605	8.48449	9.14835	8.61116	7.93116	8.26665	9.76733	8.53226	8.25971	8.24689	8.70567	7.93878	8.50858	8.04181	8.76924	8.22971	7.92409	10.1778	8.75931	7.99096	8.48315	8.27845	8.55241	7.98998	8.54567	8.23815	7.96103	7.91171	8.00542	8.7349	7.94213	7.96652	8.02806
ADAMTS9	7.82323	7.89425	8.29708	7.8642	7.87667	7.84227	7.8832	7.89515	8.11045	7.91473	7.9971	7.88579	7.87935	7.89328	7.90136	7.88995	8.01709	7.87847	8.6984	7.86678	7.85172	7.95319	7.88163	7.86588	8.13826	7.84647	7.84792	8.84057	10.1332	7.87777	7.91397	7.84946	8.46315	7.84521	7.89506	8.57155	8.01862
ADAMTSL1	7.95286	8.39231	8.48119	8.32979	7.94354	7.88437	8.63673	9.24925	8.29262	7.98367	8.88697	8.11723	8.88808	7.89789	7.90052	7.9198	8.11838	8.21737	8.69397	8.26647	7.89902	8.13619	9.14237	8.48278	8.18221	8.69623	7.95272	7.94583	7.88998	7.90383	8.67286	8.13976	7.90489	8.11878	9.29084	8.54767	8.10171
ADAMTSL2	12.3251	13.8376	12.7044	11.6343	14.6899	12.415	7.89246	8.08476	11.8408	13.381	11.0679	14.8132	14.8521	12.1828	14.4948	12.7714	14.6986	13.9933	11.0893	10.4612	8.26891	10.1442	12.7223	10.7272	7.90916	13.6905	13.938	13.2058	13.4026	12.8149	14.4779	11.9092	13.7176	13.0141	14.7057	14.4255	7.90774
ADAMTSL3	8.65245	8.14968	8.15569	7.87583	9.41176	8.17488	10.1176	9.88719	7.98704	8.59073	8.44289	8.23511	8.01462	8.75627	8.75255	8.3939	8.8104	8.00703	11.6908	8.13444	7.91923	8.70803	8.1308	8.09106	9.16908	7.86303	8.37108	8.07561	7.89619	8.10483	8.18241	8.03079	8.03223	8.16448	7.96656	8.13773	8.24651
ADAMTSL4	8.19804	8.79507	8.384	9.07688	9.74067	8.40535	9.55356	9.69925	8.41253	8.40719	9.36701	8.68557	8.50418	9.03605	9.34405	8.61898	9.6769	8.37673	8.95996	9.17035	8.58098	8.03585	9.04685	8.42198	10.6266	8.44789	9.30583	8.12849	8.74947	8.52103	8.75728	9.29699	8.69469	9.06975	8.84232	8.63633	8.07449
ADAMTSL5	9.21743	8.31795	8.09583	7.90426	9.94573	8.22755	8.72987	11.1627	8.11405	9.36717	10.5131	9.11231	8.71942	9.29949	9.09547	8.35991	9.39363	8.1068	10.2597	7.94491	8.6503	8.21302	9.07209	8.13761	8.91983	8.83145	9.426	8.10303	7.97163	8.18688	8.02017	8.34112	8.20865	8.78837	8.02796	8.13438	8.09247
ADAP1	7.827	7.84377	7.86364	7.87337	7.81887	7.82795	7.87667	7.81905	7.88723	7.90769	7.89582	7.83286	7.79883	7.99555	7.83521	7.8194	7.82939	7.86415	7.87834	7.87136	8.0599	7.81429	7.83728	7.82933	7.83602	7.86983	7.84858	7.82547	7.8234	7.83324	7.81919	7.84881	7.83352	7.87731	7.81944	7.83975	9.61541
ADAP2	7.87533	10.3208	10.4443	8.10935	10.9029	9.46663	7.89035	8.08476	9.33737	7.90451	7.97202	10.5104	8.84815	8.42773	9.80888	10.6205	11.1101	10.688	8.81771	8.29157	8.11474	8.19183	9.16218	9.98075	7.97744	9.10648	9.3866	9.19458	8.75619	9.55086	9.35458	7.9689	9.46456	10.1695	10.4633	10.656	8.11608
ADAR	9.04374	10.8707	11.0356	9.39567	9.70983	10.1807	8.79502	9.04616	10.9572	9.69877	10.04	10.3105	9.58861	9.72636	11.3097	11.0083	10.0408	11.2191	9.40002	8.62577	12.0567	9.83193	9.2329	10.6348	8.97916	9.55786	10.1329	11.1323	9.86789	11.0868	10.0585	9.58801	11.0476	11.3328	10.7581	10.8928	9.79295
ADARB1	9.7566	10.1707	9.94217	9.25553	9.61561	10.0981	9.97812	10.3404	10.2438	9.86025	9.01077	10.5472	9.51889	10.0898	9.70386	9.69908	9.93801	9.59519	11.6229	8.61669	10.8603	9.5871	9.36038	9.99894	10.0169	9.27512	9.55861	10.6357	9.40222	9.63943	9.84822	9.33676	10.5846	9.57042	9.87678	9.96301	9.43121
ADARB2	9.04721	8.20197	8.10337	14.3444	9.46553	9.14623	10.4578	8.40079	7.93427	9.21537	8.44289	8.30159	9.42671	8.69175	8.44283	8.12944	9.49715	7.91554	7.89971	7.94491	7.96325	8.13149	9.01873	7.9635	8.55501	9.46391	8.12647	7.90383	7.99359	8.11955	8.14365	7.82127	8.10188	8.13731	7.9768	8.03071	7.96606
ADAT1	8.35479	8.13263	9.07948	7.89749	8.25709	8.00819	8.51458	7.91032	8.00936	7.87624	8.15517	10.6294	9.44125	9.98966	9.19731	9.9449	8.75812	8.06879	7.92973	11.4882	10.1271	7.93619	9.56214	8.32813	7.97744	9.3866	9.91067	8.15965	7.99359	9.70404	8.20714	13.7424	8.5266	8.24037	9.45028	7.99632	8.38676
ADAT2	7.91385	8.91983	7.89187	7.91259	7.93165	7.95774	8.96706	7.85314	7.9018	8.62401	8.28697	7.92939	8.82985	8.09147	8.09187	7.86077	7.92803	7.86697	7.89971	7.98329	9.0096	7.8991	7.89548	7.91112	7.87367	8.52679	7.90394	7.88446	8.65142	7.90463	7.90301	8.12212	8.06319	7.93767	8.13486	7.83569	7.91519
ADAT3	11.1657	8.04393	7.89187	9.54184	7.87364	10.0169	9.1966	8.18616	8.16754	7.8618	9.21642	10.1077	7.93735	7.86284	7.96565	7.90388	7.91797	8.64272	7.90554	7.9282	8.21921	8.03882	8.09654	8.17779	8.10656	7.96165	7.94397	7.93086	7.86392	7.91439	7.92761	7.90193	7.90136	7.96497	7.90446	7.91066	7.94896
ADC	11.9246	9.37683	9.55728	7.88567	10.9144	10.4788	7.89035	8.08476	9.84012	12.1502	7.84336	8.9868	7.82702	7.88362	7.8632	10.2501	8.17682	10.3429	8.05232	7.83308	7.88756	9.86294	7.9557	10.3208	7.85158	7.88007	7.86849	9.88561	8.38279	11.6007	9.885	7.87353	7.84819	7.90908	10.566	10.324	7.96839
ADCK1	7.88995	7.91171	7.89278	7.89975	8.62245	7.83846	9.26427	7.88999	8.00313	7.8713	7.88812	7.88912	7.88643	7.91442	7.86629	7.85769	8.09102	7.90042	7.8259	7.90052	8.04667	7.8864	7.95944	7.86545	7.99505	8.07459	7.92803	7.87005	7.88912	7.88294	7.86571	7.93785	7.90233	7.88912	7.88446	7.86828	7.97493
ADCK2	7.82996	10.4116	12.0765	7.88246	7.86324	12.067	7.85613	8.00464	10.8671	7.87624	7.83481	9.75442	7.85489	7.84545	7.86834	8.5683	8.60791	11.2626	8.17121	7.92066	11.7985	7.82324	8.0344	10.3923	7.90492	7.89558	7.85585	10.5817	10.7586	10.8248	8.06264	9.39989	11.9712	7.85823	11.2003	10.4893	7.85346
ADCK4	7.93905	7.92715	9.40175	7.89548	8.12879	7.91366	7.89653	8.69379	8.42497	10.4169	7.87733	8.37382	7.86408	9.8854	8.00418	7.92561	8.04948	7.86455	7.87224	7.87935	10.1778	12.8351	8.1308	9.54105	7.8717	7.86041	10.2429	7.89548	7.86908	7.89873	7.92476	8.8131	8.54257	11.473	8.55983	9.60598	7.86366
ADCK5	8.6022	8.14747	7.97986	9.65202	9.03879	8.08084	7.95515	7.8786	8.46268	8.01323	9.55196	11.7125	7.97924	9.5252	7.90587	8.14151	9.69854	7.8952	8.45173	9.29202	8.18616	8.14542	9.36031	8.40157	9.83789	8.21818	8.16702	7.88693	8.39731	7.93853	7.9103	7.92734	8.01929	8.50928	9.32517	7.97942	7.95525
ADCY1	7.87782	7.89911	7.8645	7.87285	7.93235	7.84592	7.85551	7.90756	7.85379	7.85719	8.00473	7.8596	7.86025	8.51083	9.0551	7.92104	7.85432	7.85855	7.94102	7.87622	7.84937	7.87029	7.87505	7.85011	7.94262	7.84418	8.90046	8.31322	7.82733	7.81937	7.84526	7.84212	7.85489	7.88289	7.98073	7.84077	7.8789
ADCY10	7.89263	7.84377	7.93732	7.97889	7.84343	7.85669	7.87991	7.86228	7.88076	7.90302	7.9201	7.85071	7.86647	7.91167	7.8713	7.84786	7.8602	7.84774	7.85334	7.86409	7.85705	7.8864	7.84554	7.85746	7.96224	7.85637	7.86917	7.87043	7.83488	7.8757	7.86784	7.82612	7.85873	7.88563	7.83251	7.84704	13.2711
ADCY2	7.94423	7.94771	7.92735	9.27892	11.1192	7.8758	8.06639	8.12584	8.13761	7.94738	8.03558	7.9872	8.02251	7.81847	8.79121	8.10756	7.97197	8.13833	8.18516	7.8402	7.89301	8.03882	7.96317	8.44034	8.07588	10.2813	8.05505	8.07089	9.7718	8.19717	7.97218	7.90137	7.90684	7.93767	8.1837	8.21022	9.57975
ADCY3	13.5579	13.8239	13.8323	10.4752	12.4012	13.8792	8.45145	11.8647	13.7086	11.4224	10.2373	14.6601	12.9187	11.5919	12.7943	13.01	14.1553	13.8151	10.4996	8.9983	12.4441	9.51852	11.2899	13.2479	11.9997	12.0947	12.7559	13.9848	11.6516	13.3825	13.0422	9.88204	14.0322	14.0364	13.1364	14.2885	10.5937
ADCY4	8.35479	10.6049	10.3662	7.89332	7.9438	9.76266	7.92735	8.02364	10.4071	10.5559	10.0196	12.7067	9.99736	10.1228	10.1122	10.2012	10.654	10.0194	7.93916	7.87293	7.88425	13.3709	10.2399	10.7173	14.3876	9.54643	10.2113	10.801	13.4001	8.49967	7.93886	7.8085	8.00542	12.3597	11.1166	11.0425	7.9637
ADCY5	7.94423	7.90995	7.91562	7.85917	8.25709	7.95494	7.87991	7.88153	7.87089	7.93681	9.50957	7.93854	7.93644	8.76166	8.2233	7.92059	7.95278	7.92242	7.94723	7.94491	7.87447	7.8889	7.95944	7.8936	8.73475	8.13043	7.93429	7.90303	7.863	7.90835	7.88338	7.88964	7.90578	7.86557	7.88563	7.89334	7.98342
ADCY6	8.54637	9.98413	9.32002	10.673	10.1627	7.94757	8.01912	9.01369	9.39848	8.16563	7.92436	8.70819	9.39092	9.08101	10.9081	9.57041	8.03277	9.45846	9.46895	8.18137	9.54448	8.9534	8.13082	9.59016	8.58766	9.13557	9.28854	9.08043	9.65296	10.027	10.8044	8.71227	9.51393	10.6214	9.79524	9.39284	8.24232
ADCY7	9.22121	8.21368	8.13348	10.1101	9.45925	8.23338	10.6862	9.7192	8.14194	9.35251	9.77733	8.63268	8.50923	8.86945	8.80781	8.2225	10.0297	8.09576	8.02879	9.39211	8.30316	8.82691	9.09867	8.14454	10.1518	8.25258	8.63431	8.06993	7.95812	8.32834	9.02408	7.95167	8.9879	9.33621	8.05217	8.16566	9.70294
ADCY8	9.3724	8.30892	9.5395	10.4949	9.66949	9.39792	11.2594	10.0595	7.97565	9.3123	9.41929	8.88563	9.54264	9.46774	8.72176	8.35453	12.8321	8.16812	8.34596	11.3868	7.94968	8.37116	9.04032	8.08807	9.99736	9.18051	8.30096	7.97773	9.86963	9.60598	8.27956	13.0435	8.20807	9.21313	8.46907	8.14323	8.62252
ADCY9	7.81224	7.83707	7.87248	7.86172	7.84673	7.87131	7.83983	7.81843	7.80698	7.80389	7.85344	7.81868	7.83364	7.85879	7.81212	7.84337	7.81286	7.84628	7.86901	7.85731	8.63416	7.86549	7.82418	7.80473	7.83505	7.83321	7.85126	7.85938	7.84792	7.79726	7.82952	7.88162	8.82935	7.88095	7.82003	7.85347	7.84574
ADCYAP1	7.82474	9.1426	8.79981	7.89749	7.89759	7.85325	7.87253	7.85922	7.87041	7.88493	7.92504	7.93561	8.80208	7.83752	7.92007	7.82892	7.85961	7.80406	7.86639	7.80696	7.85044	7.82538	7.84483	9.00101	7.89086	8.16569	7.8365	7.88314	7.82224	7.84801	7.83032	7.91262	7.82007	7.80714	8.2864	7.84198	7.83763
ADCYAP1R1	7.88312	7.85208	7.88976	7.9067	7.78775	7.85392	8.15542	7.91032	7.88965	7.85903	8.21587	7.89576	7.89163	7.87101	7.86187	7.88314	7.87052	7.86014	7.88797	7.87622	7.89301	7.84919	7.86013	7.87935	7.8952	7.88318	7.90904	7.87159	7.86041	7.87621	7.89035	7.84771	7.89292	7.94575	7.86549	7.88851	7.89749
ADD1	11.7659	11.1056	11.0651	12.0038	11.7121	11.1947	12.0061	12.593	10.9931	11.1093	10.7078	11.4802	11.1653	11.0006	11.1429	11.1408	12.1926	11.118	11.1997	11.5256	10.2555	11.6989	11.0989	11.2055	11.232	11.3599	11.4493	11.1607	11.7953	11.3912	11.3618	10.5403	10.9703	11.2958	11.036	11.0818	10.7429
ADD2	8.59732	7.9621	7.94379	9.78344	8.66666	8.00228	9.05074	8.50944	7.99604	8.44445	8.89416	8.29511	8.08273	8.75692	8.20411	8.02648	8.65233	7.93869	8.77227	9.05415	7.89395	8.33861	8.61384	7.95179	9.54031	8.31934	8.22807	7.94959	8.42773	8.04968	8.21659	8.82634	8.07327	8.53434	7.91216	7.98264	8.34505
ADD3	8.7848	8.8592	8.9576	8.89468	8.76674	9.07679	8.89813	9.99928	9.1372	8.93097	8.99317	8.90033	9.37714	9.11723	9.31704	9.37945	10.2589	9.24021	8.73749	9.53245	9.12147	8.8439	9.37373	9.31571	8.89311	9.4938	9.41518	9.10496	9.55706	9.41243	9.71671	9.61853	9.12515	8.92782	9.71718	9.30245	9.29438
ADH1A	7.85875	7.92454	8.00677	7.91593	8.27496	7.88246	9.90445	7.8551	7.8668	7.90302	7.86396	7.88182	7.91728	9.51435	7.87882	7.86455	7.87137	7.90493	8.01533	8.19585	7.87293	8.25761	7.88427	7.87995	8.02044	8.10359	10.3861	7.91267	8.3435	7.92544	7.93803	7.96631	7.89622	8.05729	7.8642	7.8998	13.4285
ADH1B	7.83291	7.82006	7.85269	7.86036	8.01908	10.2622	8.05208	7.84367	7.88568	7.86647	7.87861	7.84757	9.32328	9.20871	10.1838	10.2554	7.91988	7.87384	7.83406	8.12361	7.86092	7.86874	7.89109	7.85857	7.87705	8.74904	9.55443	8.47965	7.87575	7.84801	7.85964	7.84287	7.88915	7.91543	8.68035	8.87106	7.82741
ADH1C	7.91061	8.9247	7.93143	11.331	7.86324	7.87992	9.94028	9.11042	7.86552	7.90769	8.06569	7.85169	7.87505	8.62112	7.91168	7.92178	7.88676	7.90745	13.0759	9.63333	7.82684	7.86268	7.90927	7.88051	7.85856	7.87541	7.86635	7.88976	7.863	8.16036	8.76156	8.5401	7.88915	7.9492	7.86699	7.88611	9.15053
ADH4	9.13921	8.62234	9.14524	10.3815	7.89968	8.79154	8.01317	8.2218	9.07919	9.41202	11.1957	9.03972	9.16483	8.99676	8.95346	9.35111	7.88299	9.27553	10.4549	10.9408	8.17385	9.51548	10.5456	9.55526	10.3481	9.44014	9.54135	9.3776	9.19589	9.31982	9.50234	8.26859	8.81957	8.99644	9.22947	9.00556	9.99444
ADH5	9.31017	8.32483	8.36459	13.1175	9.69023	8.58998	9.56392	8.98458	8.03677	11.0066	9.69814	8.67697	8.08256	9.18111	8.88855	8.28108	9.26497	8.13601	12.246	13.4043	8.44212	10.4643	9.56923	8.43463	10.3905	8.00704	8.61939	8.14572	8.93302	8.53232	8.48057	8.30313	8.32949	9.38807	8.14664	8.17432	8.89956
ADH6	9.66133	8.46966	8.23224	10.3945	9.99227	8.44744	11.512	10.7418	8.03259	9.81881	10.6055	9.33518	8.89718	10.8402	9.10481	8.43841	10.4924	8.1908	9.9436	10.0801	8.00353	9.41334	10.3047	8.28663	10.9277	8.86806	8.86777	8.16921	9.4371	8.71671	8.88758	8.54403	8.62653	9.65408	8.16003	8.28674	9.27688
ADH7	7.89405	7.8865	7.87455	7.91259	7.92803	7.87131	7.92735	7.90828	7.88435	7.92789	7.8925	7.86998	7.87245	8.13702	7.9328	7.88206	7.87992	7.89875	7.94993	7.88113	7.85339	7.89034	7.94515	7.81616	7.82099	8.03555	7.85527	7.85576	7.85757	7.87621	7.88222	7.93317	7.83489	7.95278	7.89122	7.86062	7.86303
ADHFE1	9.43485	7.93102	8.7291	10.4066	8.19089	8.45204	9.65164	10.6685	8.48427	9.33393	8.39814	8.13	8.70312	8.39579	9.82961	9.00729	8.62476	8.29779	8.41803	9.43941	7.92266	10.0423	8.7129	8.40792	8.78869	8.67265	9.17512	9.20848	8.76621	9.90881	8.85689	9.50688	8.54643	8.10165	9.33758	8.64653	12.2271
ADI1	10.3348	10.8318	10.9898	7.85449	7.85691	10.8555	7.9765	7.8786	10.085	11.7179	8.14662	11.0766	9.25017	10.533	11.1515	10.9495	9.23296	10.269	9.18543	13.2375	9.81009	11.8786	10.5227	10.8305	7.87489	9.70932	10.8725	11.1115	11.5901	10.9104	10.3675	8.97266	10.6417	11.3242	11.2158	10.6726	9.60827
ADIG	8.39418	8.10259	9.1236	9.27892	8.25709	8.01862	8.0805	8.05524	7.90871	9.28357	9.59288	8.45344	7.98378	9.48215	8.53139	8.03847	8.71007	8.01688	9.16648	8.9983	7.97217	8.73139	9.53259	8.14789	10.0271	7.93117	8.47881	8.11614	8.11581	8.14662	8.1706	8.19963	8.1438	9.10182	8.01813	8.12532	9.0742
ADIPOQ	9.10124	7.99343	7.93856	11.4813	8.77065	8.15271	10.7382	10.5465	7.92626	8.84843	10.807	8.90926	8.08557	8.73674	8.66494	7.9619	9.15463	7.97936	10.6998	9.6798	7.93173	9.41719	9.23366	9.50994	10.8283	8.43967	8.59151	7.99388	9.31873	8.12894	8.14913	9.35122	8.13067	8.71082	7.96416	8.01268	14.0667
ADIPOR1	9.11981	8.29912	8.76474	7.8856	7.84166	9.12761	8.07969	10.1745	9.73528	10.3991	7.8264	9.38359	8.10787	8.5914	9.79886	9.32922	8.02455	10.0451	8.33249	9.43208	11.4685	9.95982	8.79585	8.80074	10.6845	8.09068	8.80285	9.42347	8.39104	8.86372	9.34886	9.24175	10.1733	9.11109	8.34965	9.28087	10.6401
ADIPOR2	7.88409	7.88119	7.84376	7.84269	7.79541	7.89914	7.83153	8.66167	11.9051	7.88274	7.89912	7.96907	10.3712	7.88845	7.86763	7.90595	7.88881	10.2715	9.40525	12.8275	14.9069	7.84636	7.81963	9.35294	7.82507	9.64097	7.88368	8.53041	7.85302	10.1987	9.98454	14.7484	11.9858	7.82104	10.3526	10.0652	7.88711
ADK	9.54067	9.57815	8.84187	9.32538	10.2344	8.97412	9.20698	9.62018	8.77628	8.92461	8.41199	9.33948	9.67655	8.81581	9.53502	9.11217	8.53957	8.72193	10.0257	10.412	9.03062	8.86519	8.71103	9.50597	9.19821	9.63663	9.28674	8.95168	9.09989	9.14442	9.44395	10.2344	9.10662	9.09404	9.17262	8.95385	8.33281
ADM	12.1469	12.323	13.455	10.9216	11.6406	11.7687	12.0022	12.8978	10.9285	11.9512	11.6969	10.6636	11.3248	13.8427	11.6612	12.3357	8.49148	11.2064	9.79041	10.5695	11.6871	9.95053	13.4146	11.943	9.76733	11.545	10.8686	11.4053	9.60496	12.8429	11.3515	10.2026	11.9886	10.946	12.842	12.4543	10.9529
ADM2	11.2148	12.7849	12.4306	10.6883	12.9894	11.3132	8.91294	10.9873	13.0759	12.6941	9.01274	11.2334	12.2986	11.3921	13.1258	12.2911	9.30945	11.816	10.1799	8.93681	9.09627	10.0404	10.3531	12.9109	10.3252	11.9501	11.9959	11.809	10.715	12.917	11.825	9.23119	12.2702	8.93674	11.5204	10.8384	8.63085
ADNP	7.90504	8.55427	8.84225	8.22967	8.11898	9.08149	11.7886	7.86918	8.99109	8.36611	7.8989	8.22697	8.37384	7.95192	8.97309	8.94919	7.92504	8.37098	8.33996	8.83754	9.461	9.31577	7.86334	9.18931	7.923	8.14086	8.53393	9.16236	7.93625	7.88342	7.99291	8.37482	9.77391	7.8579	8.51066	8.11868	8.773
ADNP2	8.56179	10.5256	10.7949	8.68876	12.2451	10.7991	8.03657	9.42858	10.4443	8.21036	9.30523	9.18024	7.9766	9.7877	10.963	8.26204	9.08544	9.13489	9.24432	12.6079	11.3504	8.43022	8.5947	10.3451	9.00842	8.04473	9.68024	10.0137	7.98757	7.94804	8.40928	13.1687	10.7472	8.46098	10.1633	10.7431	8.10899
ADO	10.5724	10.6091	9.91767	7.83612	9.53284	9.19541	8.05208	8.42007	9.97327	8.25865	7.89912	9.17586	9.5276	7.91167	8.36851	9.96469	7.90489	9.97327	8.07271	7.9282	9.76894	8.18531	8.58176	10.4426	7.86041	9.68335	8.06422	9.64216	9.22402	9.25324	10.6502	8.73257	9.21843	7.97636	10.1561	10.2877	9.88551
ADORA1	8.58991	8.345	8.09094	8.31319	8.8176	9.10818	8.86237	8.41369	7.96402	8.45359	8.57285	8.30758	7.9764	8.46198	8.56478	8.60925	8.64776	8.17339	8.6903	7.92808	7.96959	8.28706	8.55315	8.19275	8.90941	7.94842	8.43737	8.27163	7.91111	8.36684	8.00363	7.90416	8.00877	8.33413	8.37664	8.58213	8.29375
ADORA2A	8.198	8.03962	8.02889	7.88246	8.50312	7.90312	7.88156	7.87367	7.88522	7.89863	7.88812	7.91299	7.93984	8.37412	7.99171	7.89181	8.1635	7.93202	7.94993	8.1678	7.94316	8.14542	7.97743	7.95192	8.70459	7.92818	8.06895	8.02643	7.94177	7.99786	7.93713	7.93317	7.92765	7.92064	7.90595	7.93087	8.20694
ADORA2B	7.85965	7.8969	8.2387	9.41176	7.92437	7.87892	8.02309	7.98012	8.15473	8.25865	7.94674	7.9042	7.91473	7.89902	7.89086	7.91169	7.91442	7.91915	7.89315	8.64256	8.16157	8.60485	8.14529	7.89942	8.87279	8.34574	7.93309	8.40895	8.24666	7.92472	7.96914	7.9224	7.90684	7.89222	8.05162	7.91597	7.9637
ADORA3	7.86542	7.86914	7.86362	8.13488	7.837	7.90061	8.17187	7.83752	7.87132	7.93504	7.87114	7.87441	7.86314	7.92685	7.84498	7.86942	7.90787	7.91342	7.86314	8.05675	7.86142	7.91618	7.9097	7.86706	7.92064	7.87476	7.9023	7.89676	7.92914	7.8689	7.86825	7.86251	7.89001	7.88643	7.88725	7.89541	9.02338
ADPGK	9.47157	8.41587	8.81085	13.4482	10.0613	8.40036	8.75513	9.72786	9.49173	9.53721	10.7676	9.13321	8.13786	8.53498	9.04164	8.43638	10.5272	8.21913	8.55124	9.29202	10.3318	9.58543	8.91176	8.69291	10.9371	8.09736	8.84674	8.20716	9.46502	8.74174	8.55991	9.34511	9.09237	9.54854	8.35152	8.17488	9.25628
ADPRH	8.87254	8.18179	8.08175	7.94397	9.00165	8.14062	8.72987	8.40079	7.95537	8.67571	8.50174	8.74101	8.02692	8.35479	8.76398	8.18747	9.63571	8.066	8.27319	8.01486	7.94862	8.66636	8.94682	8.12064	9.60023	8.00704	8.407	8.64609	8.25816	8.22609	9.07734	7.96122	8.10422	10.1294	8.08432	8.10621	8.35152
ADPRHL1	8.16495	7.87428	8.22658	8.11763	8.1024	7.90276	8.82335	8.71689	7.8969	7.95938	8.25717	8.97675	8.64595	8.07612	8.02115	7.89736	8.08625	7.94369	10.4132	11.3159	8.58089	8.34226	8.64054	8.36714	8.41677	8.55878	8.00292	7.93541	8.13739	8.13684	8.95141	12.1766	8.1006	8.18708	7.92287	8.27954	8.27568
ADPRHL2	10.0483	8.81223	8.84064	7.89975	10.64	8.84005	10.8795	12.0142	8.6207	9.0665	8.60695	8.81611	8.39271	8.68405	9.65934	8.91201	9.14691	8.92578	7.92973	10.7539	8.96253	9.2012	9.80461	8.18347	9.1814	8.08259	9.38678	8.95856	8.88062	8.55273	9.19822	10.6954	8.89817	10.1044	8.37641	8.34641	9.86815
ADRA1A	9.46758	8.88091	8.00216	8.86475	8.29876	8.04943	7.97974	8.07649	7.95357	8.488	8.71716	8.13997	8.54302	8.37412	8.27627	7.92381	8.3019	7.97492	8.03176	10.0436	7.93625	8.71795	8.37393	8.07361	9.13687	8.47129	8.25524	8.18172	8.03896	8.17767	8.05003	9.88819	8.09775	8.3743	8.24028	8.96727	8.45425
ADRA1B	8.31266	9.27534	9.46604	9.52249	11.5546	10.9065	8.11676	8.1743	9.22317	10.1934	8.33248	10.803	7.92068	8.58462	8.14489	9.65671	12.0744	10.3982	8.66719	8.1565	7.91273	11.3832	9.90177	9.51229	12.6728	8.09064	8.11377	8.58349	9.97919	9.64869	10.2081	8.07474	9.65872	8.03574	10.5724	9.45028	7.95324
ADRA1D	8.03536	7.88563	7.95327	10.4866	11.767	9.43546	7.86108	7.835	8.20667	7.93	8.17478	7.95882	7.93696	7.89793	7.92007	8.02778	8.11	7.95465	8.00816	9.1121	7.97898	9.27142	8.55434	8.09834	8.70459	7.86445	8.22861	8.07906	7.90774	8.17202	8.08487	8.09426	9.5626	8.77527	7.93803	7.92841	11.8177
ADRA2A	8.54843	7.95068	7.90306	7.94397	8.8642	7.97509	8.45145	8.89115	7.97817	8.10152	9.2433	8.12113	7.94674	7.89033	7.97956	9.9513	8.19741	7.97393	8.23933	8.52669	8.02391	8.60485	8.84337	8.1413	10.3498	8.01722	8.51458	8.16106	8.7932	8.32241	8.10496	8.10541	8.11512	9.00125	7.95053	9.50097	8.71379
ADRA2B	9.52138	8.50532	8.18038	9.61045	9.70778	8.43284	9.8072	9.3464	8.10048	9.03284	9.10236	9.22546	8.23639	8.56179	8.75661	8.43252	10.6929	8.20953	10.8557	8.47493	8.06943	9.29875	8.81936	8.37339	10.1712	8.09736	8.52897	8.22428	9.34847	8.83403	8.70555	8.10272	8.5953	9.58261	8.09755	8.26659	9.50278
ADRA2C	9.14875	8.19202	8.03344	8.84823	9.18614	8.24265	11.0393	9.75183	8.49777	9.06134	9.29245	8.26869	7.96114	9.00147	8.56716	8.18128	8.54174	8.03664	9.39474	8.14529	7.93819	8.7004	9.18522	8.05631	9.5676	8.05263	8.34976	8.04853	8.54567	8.24167	10.2513	8.7404	8.07885	8.94511	8.05267	8.08059	9.10409
ADRB1	7.95222	7.8907	7.92662	9.43342	8.14902	7.88318	8.83403	9.00037	7.89287	7.97697	7.84424	7.87967	7.89657	7.86017	7.86404	7.88409	8.29386	9.06625	7.86041	12.6004	7.91571	8.57528	8.21499	7.9387	13.7841	8.16569	8.39025	7.95461	8.10915	8.11559	8.34627	14.0975	8.01769	8.26817	7.97414	7.94966	8.48737
ADRB2	7.91596	10.9313	10.8025	9.36965	13.1416	10.2823	11.8641	14.2463	10.6812	7.9727	7.95025	8.85442	8.36499	10.5617	12.4478	11.7864	8.11992	10.9571	9.44412	9.6934	7.96746	7.95319	7.91342	10.0597	8.08382	8.31497	10.9303	11.9097	8.06851	8.7288	7.88338	8.52878	12.063	7.90178	13.3628	12.8104	7.96175
ADRB3	9.64644	7.89617	7.94591	12.3854	10.2167	8.35233	10.4257	7.92921	7.93702	7.96164	9.0256	9.45799	10.5985	10.1771	9.12505	7.91948	9.08544	8.17357	9.46991	9.52706	7.8691	8.61617	9.32758	8.27303	7.92535	10.197	8.0117	7.93133	9.68355	7.92405	7.92007	8.08159	8.40595	9.71416	8.58366	7.90484	8.24651
ADRBK1	10.7422	10.7197	10.5414	9.75055	10.352	10.6114	9.93613	10.6703	9.93054	10.4124	10.6734	10.6115	11.7471	10.2308	10.5163	10.7153	10.2842	10.4494	9.62974	11.0051	9.43521	10.4412	10.5819	10.6078	10.1403	11.6129	10.6896	10.3649	10.423	10.5493	10.5749	9.07086	10.0973	10.4122	10.5922	10.4344	9.23085
ADRBK2	8.99398	11.0109	10.8084	7.91593	11.2794	11.1759	8.12898	7.89515	10.0571	11.353	7.93115	9.08352	11.4121	11.0475	9.66463	11.1957	7.86461	11.1877	8.60474	7.93585	7.8998	9.29875	8.07498	10.4315	7.8614	11.686	11.6469	11.5157	7.93877	9.62053	10.6823	7.91079	9.30878	11.072	9.89169	10.8312	10.2091
ADRM1	10.4024	10.297	10.8438	9.4802	12.0893	11.5121	11.1478	10.9045	10.6716	10.7757	10.847	10.0525	10.6289	10.9969	10.7252	10.3222	9.07684	9.98528	11.6385	11.2327	12.116	9.05458	9.90963	11.1129	7.9366	10.5338	10.238	10.8599	10.2485	10.3198	11.0838	10.8156	10.8995	10.7531	11.2428	10.3892	9.00028
ADSL	9.3527	9.48215	10.1877	9.41176	9.66238	9.81609	9.76861	9.46371	10.1406	9.26839	10.2217	9.33587	8.10344	9.21321	9.50193	9.66743	9.63134	9.18832	9.48635	10.2008	9.66963	9.26482	10.19	9.94843	10.3544	8.39271	9.38257	9.45678	9.11589	9.27246	9.20881	8.80404	8.57556	9.30878	10.4937	9.73086	9.04757
ADSS	8.57658	8.7413	8.57076	8.75299	8.27593	8.02984	7.8776	8.03789	9.00822	8.09439	10.888	8.59402	8.2137	7.8919	8.68086	8.74394	8.79258	8.31159	7.86972	9.34396	10.1081	8.49593	9.56571	9.1844	8.48639	8.17651	8.71057	9.07089	8.62467	8.79044	8.24839	10.0301	9.03092	9.74538	8.15218	8.3951	10.2991
ADSSL1	8.20217	8.68472	8.68403	10.7929	8.37338	8.02036	7.95097	8.27337	8.37549	8.52525	8.62402	8.20803	8.47058	8.52435	8.20183	8.20435	8.92029	7.9884	8.7899	9.76409	9.3637	8.07105	8.34676	8.01403	8.22053	8.41717	8.64364	9.17618	7.9823	8.09199	8.12297	10.452	8.30386	8.35386	7.93859	9.0854	8.07678
AEBP1	10.3023	10.1114	11.5233	7.86297	12.2835	11.1269	7.89246	9.24169	12.4748	12.8591	8.34962	11.0414	9.71683	11.2439	12.0359	10.5912	12.1353	10.3824	9.82978	7.903	8.3569	11.3682	10.0977	12.5294	8.29871	10.3238	12.3464	11.5666	12.6263	13.0894	11.8098	8.34742	10.7841	10.5667	12.9335	10.9594	8.23003
AEBP2	9.92698	9.00734	8.56696	7.91928	10.6945	8.9212	7.88845	10.7076	8.50668	8.14384	8.87665	9.12946	8.68688	8.84532	9.82991	9.75044	8.27554	9.03284	11.0131	8.76996	8.40355	9.42424	8.80654	9.12758	12.1179	9.25552	9.86931	9.01501	9.90786	9.60763	9.76429	8.70615	8.83045	9.99955	9.02172	8.81723	8.41154
AEN	9.35948	8.40942	8.47269	13.1237	9.78019	8.39957	7.9678	9.96651	8.08524	8.26665	8.28697	9.30387	8.44212	8.18492	8.91509	8.43358	10.7861	8.23585	12.2835	7.9282	8.39735	9.56182	8.09654	8.34601	8.88967	8.13043	8.90435	8.26379	8.91833	8.68252	8.66729	8.11255	8.59228	9.62475	8.17065	8.28293	9.30038
AES	9.99901	10.1581	10.0534	9.47789	9.60208	10.3984	9.46485	10.2679	10.0312	9.48829	11.1314	10.419	9.97748	9.48613	10.1641	10.361	10.7934	9.88599	10.4053	11.1044	10.7203	10.5727	10.4604	10.0711	9.1426	9.56904	10.014	10.0955	10.007	10.474	10.0284	12.3298	10.5256	10.4418	10.4138	10.0678	10.5131
AFAP1	10.2655	10.1055	10.0307	9.35822	10.4574	9.95561	10.2054	9.94428	10.2483	10.1867	9.29994	9.98738	10.1237	9.64355	10.1678	10.153	10.3963	10.2281	10.176	10.9814	8.94913	10.0613	10.0054	10.1689	10.1007	9.99222	10.1588	10.1807	10.3072	10.1325	10.255	8.84281	10.1266	10.1677	10.5102	10.1761	9.98436
AFAP1L1	7.88647	11.5956	9.03589	7.94397	12.6399	7.99779	7.89653	9.05954	9.19105	12.1547	7.9897	7.92939	9.62819	7.96533	8.30993	10.1624	8.30535	7.91554	11.587	7.87454	9.21474	9.69399	8.98373	7.91112	7.90916	9.67049	7.96169	10.9624	9.18453	7.91187	9.95158	8.19279	8.15434	7.97919	8.80088	7.92416	7.90242
AFAP1L2	8.26712	8.04093	8.00266	8.42223	8.74333	8.03059	8.72691	8.52865	8.41399	8.27953	9.06265	8.29148	7.93353	8.04005	8.87993	9.45233	8.58325	8.66749	8.15812	9.00334	7.87833	7.92121	8.0282	8.76218	8.13077	7.99323	7.96757	8.39964	8.01806	8.04371	7.93233	9.42133	7.93392	8.0285	8.63631	7.9186	7.92453
AFAR3	7.90564	8.79935	9.50299	8.34107	7.95844	9.19375	9.01781	7.85825	8.81135	8.05085	8.21587	7.97588	8.6389	7.85804	8.02427	9.12656	7.97552	9.09073	8.06078	10.6888	8.64277	7.94415	7.86401	7.88838	7.95797	8.37523	7.90686	9.40785	8.05259	9.77873	7.95888	11.2454	9.35159	7.98475	8.55152	8.60873	8.11251
AFARP1	8.32788	8.0632	7.96966	9.48327	8.88615	8.05664	9.51361	10.7618	7.98267	9.32337	8.44657	8.04657	8.08828	8.48823	8.20868	8.24128	8.46832	7.96847	8.10378	9.0329	7.90962	10.3438	8.84409	8.10869	8.75613	8.45445	7.91633	7.93593	8.60473	8.02716	7.99857	7.97267	8.07789	8.20895	7.92565	8.04124	8.42106
AFF1	9.05043	8.40642	8.90302	8.76375	9.4282	8.62215	8.20969	8.71559	8.49602	9.71062	8.18097	8.95265	8.89665	9.19604	8.82882	8.95325	9.68819	8.8018	7.93219	8.12285	8.74969	9.17375	8.36427	9.09895	8.30713	9.82125	9.19356	9.58571	9.25487	8.78514	8.94711	9.27163	8.63529	9.23091	8.52065	9.12078	8.4837
AFF2	7.97376	10.3623	10.6651	7.84994	7.93542	11.2539	7.90306	8.44004	11.0212	7.87036	8.1384	10.4996	9.69932	9.68815	7.87204	11.1831	8.55414	10.2861	9.09875	7.96013	8.48358	7.87102	8.23557	10.5877	7.9203	10.0773	10.7352	10.1566	11.0852	12.2986	10.804	7.93317	9.31215	8.01105	9.10886	10.6412	11.075
AFF3	9.38718	7.85541	9.87134	8.2121	7.8609	7.8668	8.27282	7.97904	8.9769	7.87289	7.90109	9.20973	9.00356	8.30482	8.98827	9.34752	7.96343	8.31638	7.90045	7.90739	7.8764	7.87763	8.06885	8.90791	7.85601	8.91903	8.84595	8.76252	7.84639	8.40347	8.64278	7.88032	8.65675	7.85558	9.95991	9.46498	7.88237
AFF4	10.2588	8.85797	8.91251	7.94842	8.33716	8.89124	8.91294	8.09417	9.35704	8.87135	8.51827	10.3874	7.91728	9.385	9.84922	9.41744	9.23296	9.56936	8.33336	7.97452	10.1486	7.8991	9.72401	9.31092	8.85718	7.94147	9.84313	9.84466	9.45421	8.7874	9.24642	9.46472	8.74253	8.63052	8.99421	8.75547	10.1388
AFG3L1	8.07163	7.95855	8.08196	10.1938	8.13527	8.65616	7.93332	8.02241	8.00357	8.00325	8.06906	8.01851	8.38886	8.11753	8.44606	8.22817	8.15016	7.93886	8.41977	8.21691	8.68034	8.06858	8.19362	8.14903	8.77955	8.33181	8.03539	8.72165	8.2387	7.93382	8.57797	8.22275	8.16407	8.32496	7.97615	8.09095	9.46588
AFG3L2	10.9955	12.5884	11.8293	8.50476	8.16037	12.1746	8.78033	10.0479	11.1522	11.1427	9.76733	12.3464	11.4002	12.1215	11.5682	11.1515	11.5936	11.4139	10.8927	10.1898	10.8309	10.9611	11.0916	11.3392	8.14639	11.9079	11.9811	11.2602	11.2791	11.5188	12.2792	10.324	12.5358	12.1876	11.5279	11.5098	8.56171
AFM	7.86471	7.88384	7.87533	8.20409	8.04442	7.84152	7.86233	7.88713	7.83888	7.80553	7.86716	7.86477	7.82289	7.84948	7.86682	7.80941	7.77845	7.83612	7.82642	7.85083	7.83527	7.87448	7.85803	7.86647	7.82707	7.88473	7.87688	7.84389	7.86215	7.81825	7.84463	7.84615	7.82423	7.84681	7.81944	7.84425	7.83823
AFMID	8.75128	9.3827	8.37892	9.38898	8.78244	9.30222	9.56701	7.9767	9.08681	8.37249	12.1322	8.86218	10.7634	8.09198	8.5852	8.37158	8.05582	8.65162	9.08507	9.36918	9.13323	8.43545	10.3601	8.95351	8.40953	10.5268	8.77672	8.14028	9.00565	9.43647	8.44492	8.60184	8.59407	9.12396	9.02807	9.16092	11.2187
AFP	8.02327	8.93887	7.87856	8.97863	8.58462	7.94111	13.9658	7.90622	7.86463	8.01931	7.90087	7.83776	7.82191	7.83548	7.84596	7.90347	8.21672	7.84271	9.03718	7.9282	7.93543	7.90725	7.93644	7.98252	8.12208	7.99144	7.93958	7.94151	7.92233	7.92997	7.90807	7.90669	7.94566	7.86557	7.92327	7.90727	10.7937
AFTPH	8.65933	8.4841	8.59082	7.93785	8.83136	8.34985	9.7812	8.99811	8.31655	8.69867	8.1216	8.92545	8.19188	8.24598	9.00817	8.53644	8.05972	8.71075	8.4387	8.67901	9.25298	9.67097	7.94141	8.32848	9.54507	8.19681	8.79212	8.38319	8.76665	8.58718	8.6526	8.21457	8.58892	8.5827	8.15593	8.24393	8.3606
AGA	7.87051	12.6619	11.5666	9.16329	8.80218	13.8291	7.86762	8.8424	11.3489	7.87935	9.6008	11.1881	11.6027	10.5509	9.09247	13.233	7.98931	12.3211	9.35751	7.88113	9.82766	7.89322	8.77221	11.1047	7.86959	10.9438	11.3644	11.9485	9.37542	11.7527	11.0714	9.01887	10.9785	11.6651	13.3645	12.0695	11.029
AGAP1	8.10401	7.97855	8.50739	8.58397	8.32363	7.90576	9.47048	8.27286	8.02251	8.40777	8.07525	8.35226	7.92052	8.03868	9.41652	7.94227	8.5399	7.94225	8.14359	8.29927	8.55507	8.11764	8.49988	9.12803	9.36077	7.87283	7.88118	8.98277	7.94805	7.93512	7.92091	8.11625	7.95362	8.16285	8.01225	8.40424	8.23317
AGAP11	7.86962	7.87809	7.85169	7.89975	7.82843	7.82008	7.85502	7.89515	7.87995	7.86092	7.90865	7.86594	8.45088	7.85392	9.51303	7.8424	7.87819	7.86102	12.5272	10.3006	7.86306	9.27913	7.90037	7.97284	7.93116	8.32746	7.87893	7.84628	10.0581	7.87777	8.60897	10.8593	7.8563	7.8313	7.87338	8.30624	7.83251
AGAP2	7.89125	10.6228	7.88446	9.43342	11.3557	7.8848	8.33442	7.91753	7.86813	7.89221	8.50174	7.90576	7.90003	8.04519	7.94423	7.89181	8.68229	7.88867	8.4143	8.33722	7.89374	7.99371	7.89405	7.83933	8.15498	8.2718	7.93681	7.89995	10.8562	7.85344	7.986	7.92647	7.89527	7.87255	7.89183	7.85666	7.9637
AGAP3	10.2636	10.087	10.0549	10.6868	10.048	11.3424	8.00994	8.97734	9.71032	10.0477	8.95785	10.734	10.346	10.9746	11.4361	10.7427	10.3479	10.6805	9.52446	8.32562	9.54103	10.3133	9.61626	11.0433	9.59079	10.7056	11.856	10.9556	10.8138	11.1518	10.5744	8.80923	9.64291	12.2796	10.4004	10.8731	10.9915
AGAP6	8.33033	7.93363	10.1568	9.32317	8.00579	10.5486	7.9765	7.98728	8.1047	8.30382	8.62625	8.13991	9.75488	9.56283	9.53987	8.00224	7.88776	9.21752	8.73072	9.82179	9.87085	8.58491	9.04032	9.06712	9.44371	9.70932	10.3457	8.959	9.00627	8.3619	8.48737	8.93558	10.0934	8.86021	7.95345	9.60037	8.81707
AGAP7	9.17161	8.56823	7.99555	8.90279	10.4143	8.63215	10.0076	9.86012	7.95687	9.04185	9.39826	8.65993	8.54129	8.26863	9.40525	8.64266	9.42928	8.12416	12.5877	10.6715	8.22493	8.79306	9.40684	8.59542	9.67536	8.64625	8.53094	8.23156	8.80198	8.42446	9.12598	10.9165	8.19056	9.19165	8.09029	8.11512	9.25552
AGAP8	10.8338	10.6538	10.747	13.3737	11.3635	11.1941	8.93903	9.77716	10.6594	11.3347	11.6995	10.3422	8.44137	12.0677	11.5596	11.2187	11.8492	10.9221	10.6837	13.1698	10.2643	11.1488	13.0709	11.0731	9.11572	7.99883	11.5956	11.1769	11.9712	10.8188	11.5279	12.2256	10.8876	11.0371	10.9756	11.0607	11.2064
AGBL1	7.97376	7.95446	7.87591	7.90193	7.92803	7.91079	7.94449	8.16272	7.84337	8.06211	7.86055	7.90347	7.85634	8.16885	7.95977	7.92865	7.90489	7.91664	7.93681	7.95446	7.90778	7.97784	7.92039	7.93092	8.06803	7.87398	8.06152	7.92178	7.89619	7.92005	7.91255	7.89427	7.8975	8.09501	7.89769	7.92179	7.93427
AGBL2	7.9494	7.94373	7.85835	7.82946	8.25709	7.89748	7.94449	8.10295	7.8576	7.88845	8.28697	7.87693	7.94154	7.84545	7.90024	7.88466	7.93732	7.86014	8.4143	11.8109	7.87774	8.10359	7.96317	7.9204	8.28231	8.15564	7.87612	7.86591	8.10306	7.90042	8.38383	13.4055	7.90285	7.90576	7.86102	7.89181	7.90349
AGBL4	7.87975	7.87208	9.33236	7.86812	8.18424	7.91079	8.20075	8.03276	7.89554	7.98599	7.91075	7.8951	7.88268	10.1116	7.87638	7.87539	7.95555	8.79981	8.16399	7.9282	7.86682	7.88511	8.44085	7.85225	7.92276	7.953	10.6747	7.85485	7.93593	7.91357	7.89805	7.92069	8.99225	7.88976	8.85741	7.88738	13.4948
AGBL5	8.4642	8.12395	8.03065	8.69125	8.82797	8.05747	8.34456	8.89589	8.2178	8.63808	8.58716	8.61611	9.02785	8.41528	8.50525	9.06552	8.69316	8.03299	8.16844	8.46344	10.9371	8.61541	9.55681	8.09891	8.07421	8.97225	8.37682	8.08081	8.39516	8.30444	8.27015	9.2088	9.52562	8.65933	8.35897	8.03102	8.80355
AGC1	7.87051	7.9645	8.90308	8.4435	7.832	7.84756	7.9136	7.85419	9.34064	9.63302	7.88401	8.48509	7.852	7.86523	7.92446	8.67088	7.95843	7.85534	7.95263	7.84545	7.90105	10.9664	7.93346	9.05216	7.91542	7.88007	7.90904	7.8991	7.83161	7.87715	9.30359	7.91792	9.25986	7.89582	8.17153	7.88652	7.88113
AGER	8.16168	8.59871	8.04479	8.55198	8.37139	7.96885	8.74867	8.19353	8.15336	8.63957	8.95213	8.08278	8.92165	8.13749	8.04528	7.93339	8.0697	8.42273	8.10139	8.64929	8.10955	8.77472	8.03155	8.09505	8.26176	8.65676	7.9626	8.0267	7.95313	7.96832	7.91253	9.09959	9.11078	8.03814	8.18158	7.90045	7.98579
AGFG1	10.4331	9.47861	9.33815	8.74031	9.66197	8.2325	9.54909	9.93746	9.24181	10.6118	8.15499	9.37617	9.57288	10.2694	9.72157	9.43038	8.08265	9.57713	8.31429	8.78939	9.23333	10.3889	8.86309	9.14163	8.16304	9.83005	10.5272	9.74876	7.99976	8.94395	9.50569	8.36952	8.77432	8.00453	9.38623	9.4006	10.0962
AGFG2	8.70569	8.15384	8.26756	9.93907	8.88671	8.72906	8.0824	8.48854	7.94916	8.72022	9.15755	8.57065	7.99773	8.09767	8.45253	8.11076	9.19914	8.02181	8.01902	10.1606	8.08508	8.75463	9.01438	8.05562	9.49907	7.95578	8.34768	8.15158	8.66579	8.2297	8.21857	10.1111	8.16182	8.67728	8.14455	8.02628	8.50826
AGGF1	10.9388	9.56887	9.14278	7.91653	8.97501	9.58276	8.60985	8.21088	9.23426	8.7961	9.57778	10.0081	9.06425	9.03697	8.48423	9.93093	9.11962	8.98041	9.57872	8.77985	10.374	8.17454	9.06105	9.27572	8.70835	8.96305	9.63781	9.49891	8.72812	9.32366	10.6573	8.92894	9.37608	10.2616	9.63621	9.40747	8.536
AGK	10.5098	7.93467	9.86963	8.17246	9.52304	8.02665	8.88758	9.21843	9.84851	8.06211	7.86716	9.04664	7.9648	7.8645	9.83481	9.00518	9.62665	9.12345	7.90263	8.52669	9.68549	8.61617	7.863	9.7907	7.90686	7.86171	8.23963	9.49511	10.62	8.1656	8.27956	8.82212	8.58469	8.76001	9.02332	9.4547	10.4793
AGL	9.62883	8.85403	8.67923	9.88212	9.17496	9.04619	9.04878	9.16205	8.76952	9.13841	9.23881	8.79697	8.88993	9.68543	9.35833	8.85264	8.94387	8.90257	8.82274	9.51931	8.92486	9.1184	9.10368	8.77791	9.82607	9.04571	9.25309	8.92448	9.23075	8.95923	9.23035	8.99163	8.80444	8.75101	8.71951	8.85382	9.15647
AGMAT	7.88409	11.0328	7.89119	8.13402	7.92096	7.90528	8.51458	7.95393	8.33491	8.73336	8.09982	8.88563	7.91418	9.73948	10.6862	9.51385	8.38683	9.97272	8.11721	9.21295	9.16554	7.93346	8.18667	9.64367	8.09183	8.03555	10.477	9.12663	7.98757	8.39482	7.89805	8.20726	8.08011	7.91925	8.9742	9.62444	14.2386
AGPAT1	7.89805	9.2188	9.02156	7.8932	7.93007	9.33093	8.60811	8.51407	8.93919	7.91439	8.63692	8.97693	9.91643	8.75259	8.56666	8.03331	8.36376	9.1894	9.80492	9.37057	9.91563	7.93234	8.13175	8.66189	9.28049	9.6057	8.67694	8.90352	9.06536	8.99061	8.52487	9.81508	9.24584	8.06823	8.76065	8.78798	8.05258
AGPAT2	8.76096	8.08568	8.47131	9.08675	9.0996	8.10885	9.03944	8.69217	8.20567	8.78092	9.51049	8.59213	8.3765	8.60802	8.42021	8.13242	8.82135	8.11631	9.66131	8.56813	8.55866	8.87677	8.92588	8.71543	9.07239	8.2479	8.45021	8.07499	8.41105	8.37516	8.69627	8.44823	8.21763	8.78706	7.98525	8.08011	8.84356
AGPAT3	7.98668	7.92349	7.91569	8.85197	8.02584	8.84211	9.58618	10.0655	7.8974	7.95819	8.05914	8.05928	7.91183	7.93402	8.14881	8.56085	8.66079	7.90327	7.95546	8.73847	8.30697	8.15585	8.17447	7.94604	8.61525	7.87018	8.07833	8.00337	8.19123	8.00252	7.9668	8.06109	8.00715	8.1769	8.42845	7.92413	8.01872
AGPAT4	8.22338	7.92715	10.4778	7.88756	7.99555	10.0703	8.0805	9.57006	11.9006	8.15728	9.08797	9.34286	8.16607	7.97245	8.04551	9.51888	8.62019	10.963	7.94723	7.903	7.94748	8.22195	8.55434	10.9315	8.6915	8.05998	7.96322	10.1566	8.54567	10.9134	10.1753	8.28524	10.8305	8.22915	10.7422	9.71395	12.4272
AGPAT5	7.89125	7.96091	8.01571	7.91593	7.8848	7.91889	8.06639	7.84367	8.89968	7.85388	7.93997	8.01268	7.87703	8.12724	7.95814	9.50118	7.93228	7.94199	7.91233	7.92449	11.6489	7.86997	7.88303	7.89728	7.88429	7.82176	7.91009	7.95461	7.84121	7.89873	7.88966	9.05301	8.65114	8.31795	8.62783	9.15905	7.86041
AGPAT6	8.9974	8.21492	9.9436	9.4533	9.33535	9.39199	10.8123	10.8578	8.51276	12.1171	9.83971	8.74101	9.26608	9.57776	8.30993	9.1859	9.88272	8.83129	14.3828	12.5358	8.85294	9.84371	9.8204	8.97657	10.4532	9.37133	9.65074	8.49949	9.38582	8.80604	10.6287	13.3107	8.39859	9.34417	8.88453	9.30495	8.97561
AGPAT9	9.5658	9.22556	9.5922	8.47344	7.8709	8.01428	9.86849	11.8905	8.13834	9.20309	8.15517	10.0341	8.05519	13.6084	10.1319	10.8299	8.47931	9.04614	7.97355	8.12361	8.48896	10.6875	8.11562	8.8547	8.50183	7.91915	9.60052	9.52931	9.54396	9.20464	7.89291	7.88912	8.87541	10.1144	8.38333	9.84352	7.88269
AGPS	8.44295	9.71027	8.91856	12.9973	10.7635	9.58094	7.90558	8.26829	9.40002	7.92789	11.2905	9.96105	9.27913	9.48215	9.58393	9.84389	9.61785	9.65968	8.56404	8.66607	9.23533	8.84699	13.0086	9.92841	7.90686	9.8209	10.2626	9.62741	10.2165	9.99785	9.15614	8.27337	9.45395	10.0216	9.21263	9.31434	10.2446
AGR2	8.55722	8.95549	8.00481	8.45445	8.48341	10.2714	7.93731	8.49779	8.99018	8.23058	8.60558	8.28353	9.45397	7.87118	8.31067	8.03502	7.8864	8.01809	8.22839	8.51019	10.5719	8.81072	8.80352	8.16422	9.43253	9.46675	8.54177	8.05921	8.61689	8.2274	8.39458	9.22088	9.37301	9.09126	7.97832	8.06233	8.62479
AGR3	8.09783	7.93281	7.91419	9.66104	7.94401	8.0099	8.38911	8.11629	7.89263	8.04562	8.24873	7.93171	7.96222	8.10746	7.92487	7.92778	7.9009	7.92505	8.68645	8.6001	7.92476	9.08274	8.60625	8.01108	9.09868	8.14828	8.09561	8.00589	8.45961	8.07483	8.01351	8.14346	8.00394	8.64873	7.92565	7.95433	8.39514
AGRN	8.76633	8.82598	9.69602	9.17371	8.88604	9.3639	9.02819	9.03023	8.93416	8.69285	9.27846	10.479	8.0271	9.12535	8.78139	8.20866	9.87088	8.51232	8.543	8.88669	9.40497	8.3909	9.76871	9.16205	9.41021	7.87858	8.93819	8.73396	10.2535	10.5206	8.22274	8.78682	10.0653	8.7274	8.22274	8.45011	8.3211
AGRP	8.25983	7.95801	7.88489	9.29714	8.25595	7.93016	7.94335	7.90717	7.88189	8.67937	8.05469	7.99226	7.91453	8.03678	8.00751	7.90374	8.51255	8.40795	7.89756	8.22547	7.85601	9.19439	7.98029	7.90389	8.13993	7.91474	7.98821	7.91155	8.41043	7.99621	7.87559	7.89041	7.89425	8.0807	7.9115	7.8992	7.91561
AGT	7.85875	7.83823	8.63721	7.89548	7.88795	7.94111	7.87667	8.55333	8.17697	7.89359	7.9027	7.89732	7.87656	7.82649	7.89935	7.88071	7.84126	7.87991	8.02238	7.85208	8.64162	7.92142	8.08259	7.88794	8.10656	7.86303	7.9912	7.92618	7.86999	7.83086	7.89935	7.93004	7.92544	7.89981	7.8756	8.66681	7.98051
AGTPBP1	9.34406	9.97615	9.79233	8.73469	9.4995	9.46215	7.91058	8.72097	9.25688	8.99407	10.4793	9.46082	9.52993	9.43339	8.80787	10.0083	9.84391	9.7016	10.3121	8.36981	9.11466	9.79014	10.5767	9.83728	10.6014	9.7825	9.93731	9.51724	10.435	9.78622	9.96959	8.66435	9.1457	9.20823	9.87553	9.46316	9.42919
AGTR1	8.23239	8.01256	7.97173	8.96704	8.01689	8.84456	8.7877	8.2497	8.09094	8.08628	8.6067	8.35606	7.99084	8.11725	8.14031	7.97674	9.59185	7.95852	8.05118	8.49032	7.94455	8.66703	8.88582	8.08193	8.50931	8.06767	8.30613	8.02438	8.45727	8.11118	8.04288	8.25163	8.09473	8.59271	7.92224	8.00252	8.58809
AGTR2	9.14623	8.20949	8.09385	9.54184	8.97481	8.23032	10.7583	9.27854	7.97099	9.11888	9.29245	8.74958	8.1575	8.75627	8.89471	8.2135	9.30078	8.09952	8.98452	7.99307	7.93906	8.51819	9.08138	8.11213	10.1044	7.88812	8.54147	7.95986	8.46477	8.19959	8.11963	7.98758	8.18207	9.19813	8.03383	8.13923	8.78515
AGTRAP	7.87002	7.85193	8.44132	8.66552	7.86956	7.86402	8.54644	7.93056	8.89029	7.88658	7.85602	7.87696	7.83601	7.85133	7.83401	7.84219	7.88702	7.87458	7.92955	7.85687	8.8531	7.88595	7.85766	7.86203	7.89028	7.84259	7.90754	7.86847	7.88012	7.83783	7.86326	7.96206	7.92991	7.96482	8.20859	7.87632	7.88911
AGXT	8.46496	7.9359	7.92238	7.9095	7.91233	7.95921	7.90057	8.1743	7.89039	8.94775	14.4163	8.11627	9.34594	7.89553	7.98225	10.1321	8.20395	7.91599	7.87224	8.27137	7.88122	8.83398	11.9118	7.91305	8.58981	9.05216	7.99941	8.05893	7.92978	7.98363	7.95271	8.02463	7.93487	8.06534	7.92039	7.93346	8.37082
AGXT2	7.83571	7.89857	7.86656	7.89124	7.94838	7.88803	8.14172	8.09417	7.89249	7.89863	7.91542	7.87499	7.90906	7.87351	7.86682	7.8865	7.93228	7.92132	7.8848	7.92449	7.89276	7.86178	7.90037	7.84867	7.96699	7.94914	7.87536	7.88359	7.87451	7.84998	7.85613	7.88493	7.8776	7.91925	7.85502	7.83407	10.0226
AGXT2L1	7.97951	7.86656	7.93272	14.4061	7.91159	7.86093	8.24184	7.89467	8.12509	7.88433	7.89416	7.88409	9.24436	7.89108	7.92766	7.90641	7.97384	8.30531	8.43638	8.74978	10.2848	8.11346	8.04587	7.89086	8.59104	9.06525	7.97699	7.92976	8.11709	7.95313	8.70736	8.80095	8.4589	7.99082	7.87182	8.46475	10.1402
AGXT2L2	8.10384	9.59341	7.91662	8.51545	8.17647	7.96633	7.93757	7.92122	8.15085	8.19498	8.51607	8.12725	9.6362	8.10042	8.01929	8.7828	8.31806	8.03795	8.30929	8.43622	8.81726	8.70389	8.67129	8.5834	9.06494	9.55435	8.52191	8.28671	8.66893	8.95293	8.05827	8.33585	8.17697	8.47761	8.39428	8.01262	8.401
AHCTF1	9.46364	9.95056	10.3533	7.8453	8.33642	7.87774	8.17004	8.06377	10.7519	9.07154	9.46641	8.73115	10.6799	7.99966	7.88844	10.1198	7.8699	9.47127	8.70767	9.08285	12.7002	10.0429	10.3421	10.3573	7.9096	10.2986	7.86144	9.38211	8.38465	10.7976	9.78696	9.57826	10.6746	7.8861	9.68379	9.43408	8.64933
AHCY	10.4278	9.85795	7.83169	7.79794	7.88795	10.1968	7.8367	8.09417	9.21856	7.83707	7.86937	8.85888	7.85442	8.95228	7.86113	9.73425	8.09102	9.41677	7.85666	7.89411	12.999	7.83356	7.84554	10.4149	7.82176	7.82503	10.015	10.451	7.8712	9.63797	9.71852	9.63929	10.0169	7.84753	8.67387	9.55108	7.84631
AHCYL1	8.25302	10.2415	11.4882	7.9227	7.91512	10.0294	8.00819	10.2046	12.8494	11.548	9.2433	10.1984	8.74546	13.3584	10.3042	10.025	9.20063	12.2119	9.15918	9.14325	12.1353	10.9992	8.48231	11.1965	8.67477	8.34027	9.34417	11.6422	10.6072	10.3789	9.07491	9.75872	11.0569	11.1041	10.7697	10.6855	9.8009
AHCYL2	7.85714	7.83572	7.87659	7.82946	7.94838	7.80876	10.5156	10.6305	8.7639	7.83788	7.86816	7.85	7.81359	7.9103	7.80156	7.84581	7.89962	7.93317	14.0515	7.9282	9.66651	7.83042	7.88163	7.85536	7.84065	7.8526	7.85198	7.84819	7.85665	8.30492	8.90819	9.36543	8.36197	7.84458	7.84144	8.99376	7.84521
AHDC1	7.94423	7.90501	12.7962	10.7873	13.6563	7.94213	8.00819	8.96927	11.3963	7.94738	8.02705	11.824	11.4817	7.89125	7.90828	11.1213	8.18427	12.1618	9.01236	8.29157	10.0973	8.51819	9.71753	10.2985	8.48315	10.7692	8.02174	11.3295	8.57961	8.89514	7.93713	8.89087	10.3694	8.26237	10.2513	12.3476	8.08061
AHI1	7.86867	9.33948	7.83026	7.87583	7.84906	7.85967	8.14172	7.92297	10.2184	7.82657	7.82562	7.83352	7.81825	7.79949	7.87283	7.93937	7.82613	7.85746	7.86549	7.82324	9.19889	7.8779	7.85338	7.87613	7.86327	7.80972	7.88815	9.57082	7.88429	9.56746	9.58406	8.2979	10.1303	11.1172	9.27817	9.7416	7.80211
AHNAK	10.6365	9.95229	9.83987	9.49575	10.8097	10.5321	10.4656	9.69333	9.55398	8.81778	9.6275	10.05	9.39079	9.31033	10.1847	9.90007	11.5596	10.8056	9.94805	8.22752	9.16372	9.28554	10.9662	9.87515	8.12214	9.60779	9.35429	10.4183	10.3842	9.56995	10.4667	8.77692	10.047	10.7164	10.4156	9.75383	8.88602
AHNAK2	7.98914	7.89857	8.59433	8.2443	7.98643	7.97205	7.85613	7.92595	9.30425	9.95311	7.91303	8.13384	9.54942	8.18492	7.90931	7.96875	7.87547	7.88233	8.21972	8.01486	9.62066	11.246	8.6802	8.85393	8.36214	9.68776	8.12384	8.75175	7.90965	9.41455	8.03452	9.11931	9.43404	7.85406	10.76	8.74122	8.17237
AHR	10.9393	8.40254	8.16272	10.0084	11.7942	9.47305	11.6646	10.7309	10.1532	9.73276	9.35815	9.14483	8.1109	8.60791	11.7855	9.85403	10.5381	10.3613	10.4596	10.8138	8.65807	9.49447	10.6183	8.71167	10.9647	8.51555	8.82508	8.89392	9.58215	11.1606	11.0919	8.46864	10.0827	9.50705	9.32129	9.93935	9.2236
AHRR	7.90726	8.52447	7.87201	7.9095	8.14902	7.87654	8.88758	8.08476	7.86522	7.93	7.8814	7.89119	9.62126	8.61502	7.90347	7.85973	7.90652	7.85964	8.55124	7.95446	8.19333	7.86549	7.94839	7.85288	7.92535	9.51562	7.92803	7.89548	7.88179	7.88348	7.87865	7.92888	7.89527	8.00678	7.8617	7.85709	7.9045
AHSA1	8.23245	9.74336	9.44732	9.27892	8.39674	10.0977	8.72987	8.90701	9.54854	8.2208	8.12344	8.96515	9.15931	9.99206	8.03994	8.33834	8.57856	9.64301	9.13097	9.47734	11.6641	8.84057	8.69314	9.91589	8.28231	9.34496	10.6412	9.97653	10.6116	10.1549	8.40246	9.89955	9.57788	8.3765	8.86452	9.5035	8.44043
AHSA2	8.69314	9.00467	9.26825	7.87337	7.96368	9.14753	8.12898	10.2001	9.73627	8.53973	10.2889	8.72707	8.08686	12.5358	9.58475	9.829	8.6992	9.24432	8.76924	9.23895	10.4474	9.34454	10.4943	9.49526	10.035	7.87246	8.90133	9.39951	9.8921	9.14635	10.3546	9.3756	9.47814	10.3067	9.41826	9.53683	9.20974
AHSG	8.85232	8.14077	8.0044	7.90193	8.33716	8.1303	9.39199	9.01615	7.92178	9.41282	9.6372	8.16574	8.0372	9.0216	8.75255	8.14884	9.45523	8.09977	12.4058	8.66607	7.94116	8.67543	9.55129	8.14547	12.8337	8.15564	8.53505	8.05238	8.12949	8.18688	8.52251	8.31941	8.14744	9.37279	8.02466	8.1457	8.94793
AHSP	9.52376	8.34616	9.97231	10.5678	9.66949	9.6376	10.0744	8.79248	9.20733	10.0622	9.14249	9.34022	9.93042	10.2724	10.1744	10.5437	9.58067	10.1673	11.5233	12.0526	8.02171	11.0197	10.5544	9.44328	10.7803	10.3736	10.2821	8.7377	9.18092	8.82277	9.39676	11.8132	8.4031	11.4067	11.9701	8.18207	11.201
AICDA	8.36895	8.12949	8.0044	7.90426	8.41661	8.2945	7.85502	7.93916	7.9049	8.75619	7.94343	8.13384	7.95271	7.8801	8.13939	7.93163	8.1315	7.91826	7.84505	8.05419	7.89942	7.93346	7.99629	7.90728	7.9203	7.90175	8.88795	7.9399	7.92007	7.95834	7.99219	7.87483	7.91853	8.21992	7.9144	7.93116	7.87847
AIDA	8.90162	10.0648	10.4191	8.97863	8.98823	8.91537	9.35294	10.2649	10.9647	9.74041	8.93707	10.4225	9.02857	9.34525	9.60985	9.90177	8.81881	10.5303	8.7397	10.0652	11.7315	10.893	9.92965	10.9857	9.81455	9.53369	10.0318	10.8005	8.56846	10.1126	10.0095	9.57975	9.97812	10.2276	10.1639	10.2939	10.0916
AIF1	9.3012	9.94153	9.36138	8.92764	9.92055	9.06088	9.9392	9.63034	8.80281	9.48	9.83689	9.44202	9.16779	10.1572	9.75015	9.81365	10.6221	9.68653	9.46683	9.39504	8.04718	10.1602	10.1313	9.38329	10.5192	9.94218	9.16812	9.3685	9.27647	9.29816	9.59132	9.67733	9.07168	9.32689	9.59438	9.58598	8.70798
AIF1L	10.2473	10.2714	10.8423	10.031	10.7423	9.93772	10.5563	13.1875	10.6061	9.37907	9.33231	9.57271	9.8141	10.441	10.3582	9.91072	10.8583	10.667	9.8278	12.0554	9.8492	10.8922	9.40096	10.0144	10.7746	9.87106	11.462	10.1397	11.1529	9.99081	11.2971	9.29635	10.8887	10.3125	10.1165	10.423	10.0144
AIFM1	9.02261	8.69111	8.54381	9.30632	9.75921	8.50672	8.45316	9.26616	8.6641	9.62962	9.90489	9.17341	8.17105	8.69827	8.76232	8.81851	9.27917	8.69844	9.30087	9.19517	8.67895	8.87911	9.99909	8.66535	9.07743	7.96223	8.80708	8.68121	8.88536	8.73523	8.8421	9.39711	8.88997	9.27929	8.50023	8.79949	8.80019
AIFM2	9.11745	8.16087	8.27689	8.50476	8.54471	8.18206	7.84861	7.97376	7.97766	9.14077	8.79192	8.51638	8.04332	8.00518	8.6878	8.23343	9.88822	8.0236	7.83822	8.01486	8.40734	9.02394	8.27344	8.10504	8.67477	7.9087	8.49794	8.06993	8.77565	8.32419	8.17538	7.90924	8.13931	8.99134	7.99758	8.09966	8.25164
AIFM3	9.13787	8.1666	8.14062	10.1695	9.52304	8.26359	9.90445	9.21843	7.9617	9.35251	13.1579	8.88563	8.09475	8.81228	8.5169	8.21043	9.93119	8.07814	9.41077	9.34008	7.96325	9.1121	11.5214	8.14454	10.5736	8.26021	8.62791	8.05748	8.7932	8.39735	8.15483	8.04926	8.14506	9.18731	8.00788	8.11664	8.61918
AIG1	8.13417	7.91273	10.0107	8.17246	7.88964	8.23471	7.94968	8.35743	9.57975	10.5578	8.09982	7.94516	10.1174	8.3167	8.0111	9.46234	10.3302	9.59397	9.22918	9.5922	9.8393	12.8948	9.1383	7.96453	9.77699	10.0686	8.10931	7.96175	12.8447	10.6801	7.93175	8.74396	10.0169	8.51525	8.58985	9.72804	13.5335
AIM1	9.35839	8.61731	8.27997	11.2398	9.71931	8.81179	10.3595	9.68345	8.0625	9.64188	11.7786	8.94291	8.10392	9.67025	8.81936	8.5909	10.0432	8.06336	10.2336	9.6798	9.20496	10.4325	10.4237	8.18384	10.2674	8.07459	8.50603	8.39496	8.81923	9.07926	9.01745	8.56691	8.8775	9.38712	8.40157	8.31985	9.78823
AIM1L	7.88861	7.87398	8.11363	7.90933	7.91041	7.865	7.99062	7.89799	7.9128	8.44789	7.86846	7.88057	7.87049	8.08352	7.94438	7.89373	7.87509	7.85551	7.87898	7.92277	8.12206	8.96517	7.90353	7.88696	7.89839	7.90949	7.9069	7.88638	7.98324	7.84337	7.87187	7.94555	7.89208	7.89496	7.87375	7.88208	7.87199
AIM2	8.97391	9.28123	9.77509	10.5866	9.22427	9.8508	8.81129	9.84984	8.33496	10.6336	9.72345	8.75778	8.25075	9.77352	9.55575	9.57283	9.49419	9.57187	8.41238	8.09455	8.12165	9.35936	9.19374	8.72183	8.41161	8.14788	9.84822	8.56197	8.79197	8.80857	8.64132	9.00946	8.96213	9.62134	9.73567	8.9226	8.67416
AIMP2	8.93707	11.4915	11.8463	15.1894	8.12879	11.6588	11.9881	10.0062	13.478	8.13389	8.90713	12.8719	8.25406	15.082	8.20033	11.4409	8.29386	12.0695	9.44894	9.78978	15.1704	8.50771	10.3816	10.6806	8.21425	8.32086	11.1432	12.0964	9.50593	11.5886	10.391	10.6597	13.3883	13.9526	12.3633	11.5287	8.34027
AIP	13.4212	14.1299	13.6793	10.2472	12.1584	13.7403	12.2189	13.8472	13.1616	13.9805	8.5734	13.3462	13.6084	14.5621	13.3584	13.7468	14.3102	13.6594	11.1374	9.87813	12.2835	13.1033	10.9026	13.4245	8.55501	12.9276	12.3308	13.6807	12.5646	13.3303	13.7301	10.1542	13.4495	14.1924	14.0934	13.9312	8.09904
AIPL1	8.1259	7.96613	7.92956	8.18916	8.39108	8.4257	8.3482	8.28852	7.91036	8.1454	8.40413	8.11977	7.90702	8.00683	8.32762	8.05221	8.3579	7.90295	7.87613	8.04039	7.88857	7.96735	8.05324	7.94465	8.63249	7.93063	8.05128	7.92037	8.0657	7.93881	7.93911	7.86583	7.91213	8.28449	7.90735	7.95984	7.92004
AIRE	9.58388	9.40627	9.78415	11.8169	9.69371	9.39459	10.2444	9.50833	9.3307	9.77831	9.57425	9.72542	9.65158	10.6701	9.91498	9.55746	9.40353	9.11412	9.92636	10.8822	8.11669	9.25762	9.97726	10.0897	9.57651	9.51835	10.81	9.40604	9.87529	9.50684	9.62857	11.69	9.47644	9.51186	9.80931	9.99888	10.2986
AJAP1	8.4353	8.04993	7.95303	8.9498	8.67373	8.18934	9.01672	9.94148	8.15814	8.63807	9.09904	8.25574	7.96017	8.39676	8.26225	8.0521	8.5468	7.98361	8.77102	8.47145	7.90401	8.2521	8.45926	7.98485	8.72637	7.974	8.56389	7.97583	8.58054	8.10799	8.45441	7.99661	7.9785	8.43613	8.12109	8.14703	8.26836
AK1	8.12339	7.98931	7.91946	7.94842	8.08999	7.89914	8.0805	8.03276	7.84863	7.981	7.83991	7.90839	7.92564	7.98724	7.91533	7.97695	10.1905	7.91955	8.37158	8.12361	7.91112	7.96009	7.95222	7.92418	7.95797	9.0568	7.96009	7.96516	7.98757	7.88915	7.93522	7.88094	7.87547	7.88166	7.90653	7.88339	7.9781
AK2	12.0305	10.9585	11.0242	9.0451	10.7612	10.7616	8.08121	9.31111	11.2342	9.07755	8.01694	10.3522	10.3659	9.89097	9.1228	10.0512	9.48077	10.5051	9.0027	8.57607	11.0815	8.8466	8.95806	10.8919	9.2411	10.3672	10.2258	10.5479	9.91622	10.4932	10.5709	9.27164	10.6966	9.6926	10.1043	10.5856	9.97648
AK3	7.89942	12.4179	12.4805	8.26704	7.848	11.6625	8.41915	8.8424	12.0121	10.35	8.00542	11.1059	11.4648	10.6912	12.2369	13.7101	13.4335	12.5264	10.4121	7.95446	9.54115	12.6547	9.70181	12.3366	7.87939	11.2264	11.4295	12.5611	12.0427	12.5484	12.6526	8.32699	8.15273	11.5734	11.3644	12.6321	7.87353
AK3L1	8.5947	8.3826	8.82095	8.15639	8.54486	8.12703	9.42502	8.85822	8.62362	8.55931	10.3388	8.55327	9.56936	8.06405	8.35667	8.86283	9.18773	8.66925	9.49631	9.32041	9.24037	8.29985	9.54461	9.32281	8.89077	9.1637	8.25472	8.7397	8.5376	8.52005	8.85733	9.70591	8.70808	8.59154	9.02246	8.02666	9.11077
AK5	8.74862	8.61552	8.02579	8.06119	8.22512	9.14489	8.01612	8.21972	7.98266	7.9413	8.68876	8.53912	8.81894	8.37849	7.9152	7.94279	8.10218	9.0889	8.53141	9.28555	7.91326	7.88639	7.86529	8.49515	7.87564	8.83053	8.67963	9.40308	7.86941	8.66581	8.78752	9.81355	8.37105	8.68437	8.93751	8.52777	9.22249
AK7	8.88309	8.17055	8.07874	10.5987	8.959	8.08266	11.1064	10.7672	7.93458	9.68506	10.1968	8.63671	8.07526	9.24611	8.54615	8.14345	9.67562	8.09263	13.6935	13.2662	8.13438	9.06902	9.46129	8.14849	9.62761	8.63861	8.33412	8.06063	8.97989	8.70947	8.9566	13.267	8.41187	9.35782	8.03035	8.12311	9.18874
AKAP1	10.6969	10.0766	8.94199	7.9067	8.25709	9.36463	7.99592	9.07674	9.33758	7.90931	8.385	10.3053	10.8744	10.0297	8.10863	9.51574	7.89828	9.29615	7.95263	9.17282	10.598	8.22195	9.04032	8.86275	7.87939	11.2204	10.9448	10.1086	10.841	9.44624	8.01674	8.89285	9.54115	8.10968	8.54789	9.26069	10.8809
AKAP10	8.79765	8.79613	9.79628	12.3008	9.60178	9.593	7.83364	8.20953	7.99475	8.18054	9.66016	11.3987	8.30225	8.00002	11.6706	9.06815	7.84966	8.10981	10.3318	9.61389	8.59279	9.18697	8.92392	9.50299	8.14639	7.8865	8.66596	9.03252	9.15167	8.06338	9.09555	8.45567	10.3656	8.09137	8.71104	8.22978	8.62252
AKAP11	7.96005	8.47702	8.02432	8.0402	7.87965	8.16442	7.99629	7.8353	8.89313	8.01757	9.3908	7.94736	7.9814	8.45516	7.95439	8.12211	8.02291	8.09207	8.79927	8.8329	9.656	7.9518	8.79761	8.46814	7.96298	7.89003	8.78061	8.34969	7.99376	8.64234	8.35999	9.36298	8.7111	7.99889	8.43112	7.87251	8.86848
AKAP12	8.14543	8.81066	8.0608	8.2483	8.63592	8.55304	8.92131	8.83255	8.21183	8.57367	8.99616	8.6373	7.99263	8.06938	8.58062	8.65818	10.6445	8.43007	8.21399	7.93046	8.50616	8.57789	8.17029	8.76763	8.60004	7.95175	8.54007	8.3094	9.18903	8.03666	9.14412	7.96317	8.22589	8.15699	8.93701	8.45823	9.88703
AKAP13	7.93922	9.09994	9.02249	8.57832	9.75002	9.14237	8.16414	8.27337	9.52228	8.64599	7.98319	9.36921	9.15856	9.11352	9.53822	9.66127	8.22245	9.38453	8.7999	8.18864	10.0433	9.3491	8.925	9.38398	8.34926	9.2612	9.40107	11.2952	8.48841	8.91436	9.15011	8.75207	9.68016	9.49239	10.5112	9.61523	11.6685
AKAP14	7.96633	7.86937	8.13001	8.36458	8.80008	9.04665	8.36774	8.1122	7.95715	7.98756	9.5136	7.91005	8.06877	8.24659	7.84495	8.29343	8.01227	7.8813	9.87026	9.19751	7.87143	7.91522	8.81643	7.87964	7.93129	7.95208	8.33165	8.435	8.06902	7.89245	8.20984	9.84882	7.88476	7.94444	8.00124	7.86964	10.0484
AKAP2	7.85875	9.08101	8.86404	8.87534	7.8848	8.82828	8.10447	7.9004	7.88965	7.99085	7.88524	9.48796	8.61258	8.18	7.91267	8.83371	7.9842	8.35632	8.17121	7.88272	7.87533	7.92601	7.9227	8.57847	8.02044	8.43252	7.86917	7.87128	7.99359	9.13926	7.8672	7.85568	9.06255	7.93906	8.9068	8.47555	7.91519
AKAP3	8.17444	8.17512	7.97679	8.34107	7.91775	8.17874	9.50639	8.72735	7.90735	9.11888	8.07474	8.00464	7.94087	8.22486	8.29542	8.06462	7.91629	7.98549	12.7204	7.89183	7.94397	7.84243	8.31598	7.94235	8.32904	7.89967	7.94397	7.90766	7.90087	8.13923	8.64009	8.17494	7.97126	8.71082	7.92997	8.02391	7.91635
AKAP4	8.66818	8.1398	8.05742	8.40497	8.82518	8.48366	8.91635	8.12041	7.94545	8.92762	11.8591	8.55259	8.29767	8.54537	8.28419	8.05963	8.64471	7.99022	9.92242	8.77277	7.9239	8.5644	10.5289	8.06724	8.97864	8.37211	8.20438	7.98962	8.47936	8.10257	8.14822	8.02155	8.16261	8.64143	7.94343	8.17476	8.15297
AKAP5	7.94423	7.971	7.9095	7.87204	10.2966	7.84629	8.15542	8.15347	7.87624	7.87036	7.93411	7.93455	8.32893	7.96249	7.87638	7.89618	7.98931	8.19624	11.9811	7.84545	7.88756	7.90387	8.06769	8.2784	7.89086	7.953	7.99398	8.23997	7.88179	7.9065	8.12606	7.87761	7.9356	7.94232	7.95877	7.91853	7.94184
AKAP6	7.86226	7.79726	9.17202	8.09768	7.87364	7.87808	7.90057	7.87738	7.84757	7.84537	8.02705	7.85448	7.84104	7.86851	7.89554	9.5617	7.88676	9.05614	8.06758	7.85208	7.86628	7.8976	7.8551	7.85702	7.90339	7.94147	7.85641	9.22893	7.87451	7.90923	7.86088	7.87483	7.86089	7.96292	8.49607	7.88524	11.8306
AKAP7	7.95978	7.8797	8.19356	7.88127	8.87197	9.11576	7.85721	7.93636	8.58415	7.89116	8.80624	7.96919	7.86054	7.89938	7.90299	8.21542	8.03255	9.06959	8.05905	7.96412	8.54286	8.06364	9.28994	8.23805	8.04564	7.90813	7.85199	8.50989	7.98384	8.65807	8.43394	8.01441	8.49132	7.97532	8.67264	8.3228	8.90315
AKAP8	7.96082	8.30174	10.1267	8.56581	7.93937	7.83085	7.90804	7.92921	10.815	8.47944	13.8535	8.82221	7.88409	7.90492	8.07391	9.02024	8.01709	7.93147	7.97846	8.1678	10.8217	8.32973	11.6378	9.58715	7.83134	7.91915	7.8571	9.72585	10.6116	9.43758	10.1828	9.16596	10.1765	8.00338	9.16341	9.91934	7.93228
AKAP8L	12.2594	11.2239	11.6478	7.99936	12.0427	10.8657	7.92333	8.51495	11.0371	12.361	8.25639	11.991	7.8555	11.8033	12.1944	10.4221	9.77249	10.0659	9.26848	7.89832	9.72679	9.81881	9.81564	10.7713	8.14639	7.8865	12.7943	10.8851	12.2634	12.2053	11.0959	8.75698	10.7361	7.87868	10.2592	11.4002	7.8651
AKAP9	9.8035	9.0861	10.3077	9.94339	11.0646	10.0693	9.99744	10.4967	9.29955	9.76036	11.9301	8.68929	9.09755	9.82161	10.0687	10.4172	8.71436	9.4984	10.5847	8.34101	8.15173	11.0227	10.35	9.33346	8.98245	9.08769	10.2042	9.72585	8.68602	10.3588	10.2593	8.23516	9.40358	9.92191	9.36411	9.49384	8.61129
AKIRIN1	9.12029	10.384	9.04564	10.8237	10.1455	10.229	11.2921	10.3041	9.20093	9.99123	8.67543	9.77409	10.4464	9.60617	9.7384	9.40281	11.6528	9.30173	9.40667	8.87826	9.22402	8.59514	8.80314	9.3679	8.45542	9.84723	10.1332	9.50795	10.6947	8.76678	9.53591	8.51273	9.74066	8.50736	8.74916	9.85315	10.1699
AKIRIN2	11.2667	10.4648	9.78275	7.85449	7.93165	10.2016	11.2966	12.9666	11.7506	8.11026	7.8827	9.27658	7.8974	10.104	11.6003	10.4605	8.1315	11.0478	8.2006	9.80772	11.6565	7.9678	7.93644	10.7983	8.11389	7.99883	9.92246	10.6412	8.0329	9.56458	8.09276	9.9449	8.9412	7.88723	10.4395	10.9879	7.89653
AKNA	7.86867	7.89425	9.32069	7.87204	7.9438	7.875	8.64238	7.90428	9.28975	7.8572	7.90464	7.96275	7.87101	7.95286	7.91634	7.89222	7.91079	8.90445	7.85196	7.8897	9.58688	7.8976	7.87744	9.01846	7.86524	7.85916	7.88584	7.88653	7.85576	7.92234	7.93634	8.37497	8.24629	7.83399	8.41187	8.84139	7.86997
AKNAD1	8.02984	9.01745	9.5718	8.05762	8.06761	7.91271	10.6783	8.37925	8.9708	7.96839	7.97202	8.62937	8.95085	8.76846	9.51957	8.82547	8.83822	9.40255	12.4044	8.50183	7.90105	8.09736	7.94198	9.4219	8.16316	9.66155	9.49954	7.94111	10.436	9.44532	8.53976	8.17106	9.13291	7.89326	8.27787	8.40429	9.91156
AKR1A1	9.38401	9.41297	9.58371	8.75386	9.30838	9.47466	8.87167	8.85139	10.1663	9.05387	8.38157	9.25306	8.3153	8.88192	9.53248	9.08196	8.75188	10.094	9.71755	8.75484	10.9785	8.45254	8.55302	9.64948	7.92567	8.39995	8.84401	9.62903	9.29908	10.3365	9.13109	9.24353	9.81996	7.99523	9.23995	9.30776	8.11111
AKR1B1	9.59749	8.52447	9.10966	9.97213	10.0794	8.51969	10.985	10.9733	10.1367	9.81059	10.4051	9.55697	8.18303	11.1814	9.1552	9.26319	10.7661	8.28237	9.61573	9.7109	11.1386	9.64216	10.7315	8.42666	11.0141	8.79225	8.92724	9.0634	9.52672	8.82901	8.68199	9.78347	8.93245	9.65748	9.09151	9.83173	9.08163
AKR1B10	7.87632	7.95709	7.91304	9.43342	8.25709	7.86093	8.10447	7.89159	7.84814	8.2152	7.85783	7.89809	7.88498	8.3167	7.89828	7.9067	7.99518	7.87071	7.86812	7.94939	8.19228	8.00692	7.9557	7.85128	7.8952	7.96625	7.89865	7.89686	7.92714	7.85288	7.84538	7.92535	7.8975	8.11682	7.89474	7.88794	7.96839
AKR1B15	8.19355	7.87293	7.89912	9.63047	8.92508	7.89748	8.03657	8.02364	7.85389	7.94151	7.88004	7.93921	8.5899	7.92413	7.89935	7.92997	8.11491	7.92132	8.06078	8.29157	7.89624	8.03882	8.34304	7.93543	8.36214	8.18233	8.04227	7.87438	8.86275	7.97065	7.95271	7.94835	7.90136	7.89143	7.89087	7.91267	8.02806
AKR1C1	8.02984	7.97451	7.83612	8.31592	8.70062	7.91889	7.94968	9.38669	7.85208	7.87624	7.8486	7.8635	7.85879	7.85661	8.73214	8.00224	9.92043	7.89813	7.8848	7.83308	7.85449	7.86364	7.88303	7.82615	8.99462	7.80436	7.97039	7.98552	7.86711	7.87505	7.86902	7.85214	7.89	7.88479	7.85208	7.95025	7.85586
AKR1C2	9.77768	9.59902	8.82229	8.60848	10.1875	10.5319	10.1602	11.1236	9.37654	10.2216	8.05711	7.89643	9.78446	9.83423	10.74	10.0665	9.68934	8.85344	8.8287	10.3382	8.56804	8.88248	7.90931	7.92065	7.89383	9.4055	10.0664	10.2789	10.3121	9.84723	9.53568	10.8504	9.6218	9.91322	9.39942	9.7756	8.75687
AKR1C3	12.1693	12.9651	11.7894	7.9392	8.37567	14.0423	11.2214	12.7884	11.7933	10.6043	11.777	11.3392	12.361	11.6017	13.4351	13.4335	14.4762	13.2202	14.1468	10.2454	14.0023	13.4509	13.9368	11.9604	13.8463	12.1876	12.8116	13.4889	13.5927	12.1469	13.7577	10.4273	12.4283	13.0969	11.1975	12.8372	7.8713
AKR1C4	8.52222	8.07443	7.96652	7.91593	8.47891	9.94271	8.06639	7.92007	7.89513	8.35428	8.89097	8.0021	7.87605	8.05691	8.16046	7.96516	7.91442	7.9427	7.88575	7.89411	7.83823	7.87667	8.05096	7.93681	8.31471	7.93117	7.90904	7.87128	7.86588	7.88799	7.8863	7.83446	7.94012	8.23495	7.90992	7.92365	12.4672
AKR1CL1	8.18628	7.93339	7.95857	8.39805	8.53841	7.93072	8.10881	7.95517	7.87259	8.15866	7.86479	8.16014	7.90421	7.9583	8.00594	7.94559	8.22824	7.98442	7.97014	9.42451	7.83695	7.91309	7.90106	7.88503	7.99134	7.93382	7.93879	7.90641	7.88894	7.89379	7.94536	10.0763	7.88181	7.90473	7.88567	7.92539	8.10048
AKR1D1	11.465	11.3544	11.3402	11.6096	11.7043	11.3899	11.5487	11.5877	11.3103	11.503	11.5721	11.3835	11.3771	11.4212	11.4648	11.2962	11.4716	11.3978	11.7432	11.614	10.8571	11.7134	11.5253	11.4121	11.6121	11.8262	11.4527	11.3259	11.7533	11.3797	11.3939	11.6261	11.4178	11.391	11.4011	11.3449	13.5785
AKR1E2	7.88312	7.8969	8.42142	8.34107	8.24037	9.17282	7.98566	7.82843	8.66334	8.00675	7.87053	10.1693	8.24479	8.18993	9.27581	8.79484	7.91079	7.84948	7.97846	7.92066	7.84178	7.89034	7.90564	9.66086	7.85768	7.91632	7.9292	8.81208	7.93593	7.85873	8.57567	7.85814	7.87234	7.87659	8.21097	9.02515	7.97493
AKR7A2	10.7953	11.0543	10.6238	11.4813	11.1618	11.0573	13.3362	11.991	10.0744	11.2135	11.3942	10.6376	10.4321	13.2157	10.5167	10.4834	11.6504	10.588	11.3216	10.0116	9.26819	10.9942	12.5764	10.5859	11.621	13.5046	10.7145	10.5247	12.2196	10.7591	11.0212	10.1116	10.1785	10.8481	10.6238	10.6511	10.2289
AKR7A3	8.3816	9.04101	9.17753	9.03155	8.35632	8.99493	8.88758	11.0711	9.75539	7.89617	9.26773	8.38181	8.12315	8.18492	8.46907	8.07653	8.00541	9.04983	8.78934	8.27137	8.26362	9.68437	11.1318	9.36872	9.25324	8.15048	8.76996	9.25394	9.32529	9.27993	10.2209	8.26198	9.39792	8.56289	8.82806	8.11425	8.29091
AKR7L	7.92541	7.96191	8.064	9.4533	7.89144	7.94805	7.88513	8.15347	8.21532	8.7263	7.85044	8.51309	9.74287	10.0126	8.33792	8.12944	8.00021	7.90042	7.95263	9.46697	8.45841	7.92142	9.27417	7.97025	7.86235	9.35469	10.3425	9.35061	7.86711	7.91357	7.86367	8.17371	8.10843	8.17584	7.93789	8.01575	11.9886
AKT1	11.3456	11.9432	11.855	11.8389	12.9348	12.4759	11.0228	10.4728	12.2791	11.6534	11.3482	11.9654	12.0729	10.883	11.1811	12.2177	12.0189	12.1536	10.4715	9.05125	11.4871	11.4879	12.0466	12.1359	12.4333	11.7206	11.7975	12.3072	11.2523	11.9711	11.6141	9.81224	12.3278	12.8163	12.2161	12.4337	12.4455
AKT1S1	8.27753	7.95842	7.91103	7.8642	8.08999	9.75122	8.21928	7.98728	7.91633	8.13872	7.94343	8.17842	7.87482	8.3997	7.93427	8.00355	7.88083	9.21891	7.88575	7.94939	9.42098	8.03882	7.90564	9.18664	9.11572	7.9135	9.05712	9.07028	8.02407	9.82251	8.05342	8.24592	8.21535	11.6683	7.98878	9.22807	7.95746
AKT2	7.8677	7.95446	10.0898	7.90193	7.95346	9.01255	7.84861	8.25231	9.19165	7.94452	7.88964	9.06485	10.9313	8.08256	7.86259	7.91439	7.9645	7.92327	8.07969	7.83656	8.19613	7.92863	7.88804	10.2227	8.28231	10.2698	7.85641	8.64837	7.87575	8.77	10.3466	7.94198	10.7056	12.6475	8.45296	9.48796	7.90774
AKT3	8.26974	8.00337	8.03445	8.01501	8.41995	7.96377	9.2975	8.401	7.88118	8.27084	8.29259	8.02957	8.26119	7.98667	8.74117	7.94573	8.43296	8.14672	7.85363	8.05777	7.95722	8.12905	8.09494	8.08164	8.44377	8.18376	7.9429	8.08209	8.12808	7.93072	7.94865	7.89447	8.22585	8.12216	7.96195	7.92413	7.91981
AKTIP	8.76648	10.7585	10.0159	7.97173	9.92862	9.30308	9.91216	9.62394	9.48363	8.98364	9.4666	8.6996	8.82069	9.46316	8.79554	9.04211	9.33953	9.59482	8.42064	8.54869	9.8246	8.71752	9.35996	9.0277	9.5806	9.32774	8.4048	9.80281	8.7535	10.1391	8.79573	9.01654	10.1388	8.76023	10.2036	9.12794	7.89759
ALAD	8.26776	7.93936	8.0759	11.1416	9.19603	8.30055	8.49487	8.94453	7.96154	8.67644	8.18743	8.15893	8.10553	8.74843	8.20754	8.23255	8.42834	8.17432	8.15789	8.26699	8.03926	8.43065	8.15888	8.14246	8.7064	8.10454	9.0856	7.96081	9.21194	8.02646	8.43638	8.06713	8.58834	8.39201	7.98163	8.09294	8.22564
ALAS1	8.37461	8.8175	9.05752	9.16822	8.62626	9.18766	8.04321	9.7367	8.88737	8.15544	8.68906	8.90303	8.73981	8.51816	8.15264	9.03102	9.4822	8.95339	8.73299	8.63321	9.2143	7.97398	8.25747	8.87664	9.61849	8.76039	8.52554	9.06504	8.73088	8.77203	8.77589	8.47403	8.56097	9.00247	9.03226	9.10058	7.91212
ALAS2	9.55527	7.94492	7.90941	9.25606	8.32687	7.96831	7.91638	8.37002	9.14851	7.9981	9.12878	8.49909	7.98325	8.43697	8.08593	8.01202	8.0054	9.04642	9.6119	7.95148	7.89411	8.30978	7.97866	9.17137	10.5889	7.98772	8.03881	8.40693	8.31338	8.28248	8.1167	7.91445	7.92513	10.0878	10.585	7.93243	10.0621
ALB	8.88356	8.22671	8.13533	10.1688	9.28341	8.23636	10.3363	9.6898	8.24911	9.29677	9.66058	8.7393	8.08786	9.94076	8.68856	8.2566	9.47389	8.12422	9.64224	10.5102	7.95595	9.06472	9.72206	8.22111	9.85261	9.04922	8.50248	8.12435	8.92085	8.40642	8.35427	8.74577	8.36174	8.94804	8.0016	8.15071	8.7109
ALCAM	9.66301	11.08	10.0704	9.50358	12.307	11.5188	10.6783	11.2719	10.6087	12.3889	10.3201	9.60281	12.1717	10.751	9.68968	10.6298	10.8447	10.8744	13.8306	11.5962	12.5698	10.0835	11.165	11.5089	7.88192	11.7694	10.9292	10.394	11.9051	8.95168	8.95876	12.5942	11.774	9.6798	11.125	10.0548	9.27817
ALDH16A1	8.00538	8.13055	7.95244	7.89548	7.98643	8.06511	8.91294	10.0748	8.01471	7.98599	8.68252	8.76477	9.256	8.09147	8.70149	8.10572	8.21051	8.16872	7.95883	8.47493	10.4021	9.25384	8.38619	8.14633	8.87279	8.81959	8.65591	8.17723	8.16635	7.91928	8.15809	8.92227	8.57397	8.53931	7.97607	8.14884	8.73753
ALDH18A1	12.1258	10.4332	9.98859	7.85691	7.87364	9.75982	8.64238	8.40079	10.0698	7.92179	7.83319	9.29165	9.6772	7.86017	7.87974	11.4714	7.92591	9.66696	7.93196	8.1565	13.7086	8.5949	8.08259	10.8871	7.85683	9.28278	7.89392	11.1702	7.90774	9.9827	9.81341	9.94047	11.9335	12.063	10.2191	11.3586	12.8093
ALDH1A1	10.1733	8.80989	8.71317	9.91119	10.2912	11.4908	8.3754	8.38241	9.07387	10.3853	8.69824	9.38285	9.82305	11.4001	10.0039	9.76566	10.6547	10.4296	9.09357	7.983	8.11595	10.1234	8.77549	8.71997	11.6934	10.0147	12.2407	10.607	10.0303	9.34717	9.59119	8.00457	8.88128	8.48886	9.29699	9.32912	9.84921
ALDH1A2	8.64157	8.02693	7.94369	9.3813	8.82365	9.38393	9.78204	8.87584	8.08551	8.53097	8.78143	8.15861	8.38564	8.54688	8.31593	8.13024	8.65852	9.25093	8.59062	9.92837	7.90453	8.33186	8.70085	8.01006	8.66607	8.41765	8.29926	8.9515	8.47595	8.29374	8.01874	9.8504	7.99896	8.56813	8.61508	8.59681	8.40591
ALDH1A3	9.85986	9.76438	9.13356	10.0337	10.604	11.9504	14.2445	11.2437	10.6847	9.0982	10.0315	12.1479	10.7988	10.3342	10.2225	9.5806	11.2361	10.9544	10.5302	9.04519	10.2577	9.70042	11.3163	11.7868	8.44189	10.6641	10.9377	9.75809	10.6845	9.9264	10.9665	9.23381	10.7471	10.6139	10.5003	11.6109	9.37339
ALDH1B1	8.63006	8.99526	8.95943	8.27416	8.66357	8.20188	8.42157	8.3131	8.73509	9.68148	8.00245	9.24785	8.78756	8.95241	9.13424	8.74432	8.36183	9.27307	8.45187	8.49835	9.51161	9.15986	8.18235	9.32929	8.99595	8.78617	8.41171	9.56605	9.14264	8.93398	9.20254	8.37457	8.64218	8.98494	8.96247	8.83039	8.28892
ALDH1L1	7.86678	7.88203	7.88052	7.84033	7.89144	8.67709	8.54584	8.79248	7.84152	7.87219	7.8814	7.86226	8.41423	7.87933	7.85787	7.85344	7.83581	7.85964	7.90263	7.8843	7.79713	7.91469	7.86607	7.84238	7.8643	8.02725	7.83051	7.85758	7.88912	7.82881	7.87689	7.84239	7.80221	7.94232	7.85127	7.84615	8.01862
ALDH1L2	8.3189	8.8285	8.56794	8.2443	9.26262	9.03443	10.962	8.30555	8.69827	8.3445	8.86224	8.49724	9.00101	8.20575	7.84731	8.56716	8.73894	8.09458	7.95883	7.84545	7.90651	7.95656	8.32916	9.11513	11.9129	9.0568	7.93561	8.47974	7.88303	9.18301	7.94884	7.93879	7.90933	8.13731	8.3551	8.89092	10.1216
ALDH2	7.87137	7.87131	7.85169	7.85814	7.98643	10.7004	7.92735	7.96778	9.94619	7.89995	7.93706	7.99357	9.29278	10.9139	10.0425	10.3797	7.84334	8.40235	8.21043	7.98329	9.01588	7.87448	7.87499	9.3812	7.91773	9.40684	11.7994	9.95558	8.04314	10.4437	10.7863	7.96013	9.62681	7.87337	9.0078	8.71281	7.89749
ALDH3A1	9.44964	7.91915	7.91946	7.93484	10.6233	8.72467	7.95515	11.6944	10.1061	7.89359	7.88004	7.97588	8.49626	9.72486	9.73976	7.88314	8.24789	8.30943	8.17121	7.903	9.19958	7.84426	7.83162	8.78767	7.89828	7.93427	10.4345	8.34052	10.4221	9.18886	10.7346	8.40812	8.97561	7.83816	8.07639	7.88566	7.88182
ALDH3A2	7.90304	8.46468	8.76521	8.38919	8.44595	7.8987	8.12255	7.9973	9.21736	8.52459	8.27531	8.05173	8.27463	7.98726	8.53019	7.98404	7.9125	8.5687	7.85984	9.56646	10.2764	9.01758	7.94584	8.25052	8.80725	8.19625	8.18377	8.43868	8.50313	8.39394	8.5431	9.58719	9.10087	8.85125	8.40749	8.3202	12.0037
ALDH3B1	7.8563	8.23817	7.89447	7.86358	7.86081	7.87169	7.87415	8.20133	8.01516	7.83783	7.92377	7.86499	7.85423	7.9316	7.85882	8.2346	7.9906	8.12792	7.85114	7.90993	8.49341	7.95857	7.83454	7.83846	7.86145	7.8342	8.41189	8.31772	7.84698	9.46555	7.82669	9.065	7.8664	7.86886	7.97801	8.09868	7.8765
ALDH3B2	8.16798	8.1556	7.93025	8.62054	8.24874	7.94854	8.00105	8.26519	7.88776	8.04828	8.22733	8.00002	8.7629	8.17204	8.05577	7.99408	8.52489	7.89539	8.13198	9.70465	7.87957	7.89023	7.9563	7.89987	8.01992	8.46308	7.90389	8.32907	7.8782	7.91049	8.08062	10.0691	7.91514	7.96928	7.89343	7.90345	7.97609
ALDH4A1	10.2293	10.1477	9.24418	9.35014	10.502	10.13	10.3515	10.8765	9.40082	10.4131	9.66225	9.76669	9.46549	9.71273	9.91991	9.71133	9.59283	9.41131	9.59428	10.3333	8.95727	9.12554	8.96343	9.33689	9.7196	9.44501	9.85767	9.5602	10.0822	9.6998	9.59826	8.54413	9.81531	9.55678	9.224	9.38308	10.0625
ALDH5A1	9.72352	8.96655	8.89805	8.8727	10.3309	9.71371	9.67973	10.2617	9.20367	10.0929	9.08856	8.34094	9.42462	10.0174	9.94452	9.40069	9.78496	9.27574	9.27585	10.932	10.0483	11.502	8.22283	9.01685	10.1733	10.1149	10.196	9.61286	10.362	9.60125	10.0232	9.19072	9.48793	9.10767	9.29492	9.35599	8.49129
ALDH6A1	10.4567	10.7199	9.52728	9.61544	10.6861	10.7421	8.53333	8.21924	9.85621	8.77943	7.93299	10.3353	9.94221	9.44026	9.92296	8.57516	7.9889	10.1737	9.20931	8.67117	9.3022	8.90566	8.58051	10.1088	8.12278	9.52516	10.345	10.4035	9.58951	10.8049	11.0209	8.56558	9.96369	7.99362	9.56604	9.81818	10.8734
ALDH7A1	14.2154	14.1924	13.9918	11.3408	12.3682	13.8743	11.365	12.8867	14.0037	14.191	11.8612	13.9765	14.1265	12.9779	13.6057	14.1125	13.8629	14.035	11.5196	10.2491	13.426	13.6675	13.845	13.9951	14.3567	14.2846	14.2991	14.2154	13.6757	14.2316	14.2222	10.4623	13.6243	14.1692	13.9473	13.9691	14.5889
ALDH8A1	8.67133	8.62958	8.16826	9.49558	8.79666	8.22067	9.56615	9.2368	8.09207	9.52442	9.21199	8.54339	8.90763	9.50625	8.46027	8.41403	9.25649	8.71395	9.49912	9.75941	7.89742	9.7577	9.41261	8.23486	9.13996	8.88842	8.53248	8.11888	9.44441	8.33629	8.79985	8.82414	8.35166	8.64346	8.46126	8.41364	10.2631
ALDH9A1	14.2386	14.1539	14.2627	11.8697	13.6822	14.2343	12.5111	14.2776	14.2343	13.6025	12.452	14.3208	14.1468	12.6949	13.5533	14.2724	14.7115	14.4163	14.3039	10.9871	13.9746	14.2885	14.5998	14.4216	13.9406	13.886	13.7501	14.3723	14.1265	14.3399	14.4678	10.962	14.3843	14.3955	14.1897	14.2689	12.76
ALDOA	9.53107	9.28656	9.24454	8.74748	8.94299	9.97938	9.51995	11.1905	9.28014	9.84601	9.58553	9.54033	8.92161	9.28413	9.82451	9.25758	10.348	9.39887	9.67493	9.44911	10.8497	8.86262	9.37412	9.34527	11.0926	8.80355	8.3159	9.79236	9.50666	9.51041	8.9292	9.84531	10.0558	10.0428	9.20946	9.87064	8.29124
ALDOB	8.8869	7.95959	8.03216	7.84887	8.31639	8.06511	7.94449	8.42007	7.96606	8.11999	9.31781	8.11049	7.93009	7.94888	8.42252	8.09756	8.8285	7.96081	8.00117	7.903	7.89811	7.90042	8.08259	7.97475	7.98773	7.89757	8.20308	7.90669	7.8712	8.1002	9.62084	7.91007	7.96669	7.92483	7.92593	8.01931	7.86234
ALDOC	14.8755	15.2129	14.9826	11.359	13.6537	15.0029	11.9228	14.8547	14.7484	8.94775	9.70591	9.55987	13.6057	9.85795	14.1497	15.1288	9.5395	12.4909	11.3832	10.1728	15.4313	8.84699	9.34775	12.4179	9.75713	12.2698	8.08874	11.953	9.51795	14.3146	14.9012	10.9713	15.4402	13.3462	13.4245	14.2741	9.01723
ALG1	8.11538	7.94021	7.95484	7.9227	10.0794	8.57429	7.92007	7.85825	8.14683	8.09171	7.96205	8.07566	7.92677	7.8545	7.92839	9.04235	8.68229	7.96142	7.85586	7.94012	9.15718	9.56343	8.70809	7.9387	8.77913	7.89558	7.94397	8.77434	7.95812	9.61865	7.93427	7.93879	8.08119	7.9492	8.49607	7.89385	7.86573
ALG10	10.0908	7.94021	7.91946	7.88567	8.45742	7.83085	7.92735	7.97376	7.89686	7.88608	7.89912	7.9042	7.894	7.88196	7.92979	7.88031	7.94513	7.92893	7.91762	7.903	8.44256	8.4049	8.00338	7.95525	8.9667	7.88007	7.92149	7.93484	7.87451	7.87893	7.93993	8.00804	7.94343	8.08376	7.88522	7.87659	7.92887
ALG10B	7.87286	8.39155	8.04829	7.89057	7.9224	7.97268	7.87195	8.55779	8.28457	7.88957	7.99539	7.94115	8.26584	8.50842	7.98601	7.91089	8.28218	7.90162	8.07015	8.69503	9.5338	7.86484	8.44731	7.90659	7.85913	8.00477	7.87662	8.20133	8.0139	7.88368	7.92823	9.15628	8.35252	7.9829	8.01079	7.88119	7.95739
ALG11	8.70764	8.26651	8.12052	7.93979	10.2954	9.11644	8.02363	9.43848	8.05856	8.29995	7.88401	8.31361	8.17485	8.28727	8.46091	8.63125	8.27886	8.27331	7.87913	8.09418	8.47004	7.93409	7.87783	8.36409	8.79002	7.93081	9.18168	8.03404	8.51197	9.46438	8.20395	8.35432	9.24297	9.61756	8.58238	8.24454	7.98069
ALG12	9.14875	8.28347	8.13958	10.0768	9.65527	8.2295	10.2641	8.59302	7.96839	9.44878	9.41929	9.00912	8.0636	8.99531	8.69384	8.33237	10.2706	8.10541	8.48819	9.21295	8.18089	8.47474	9.41802	8.8272	8.65577	8.03555	8.53725	8.71444	8.49263	8.29716	8.13445	8.11717	8.17391	9.12858	8.34134	8.14239	8.60532
ALG13	9.41586	8.70696	8.1642	8.28015	8.67905	8.43583	7.88489	7.88838	8.88339	8.58886	9.02698	9.78499	8.04202	8.66086	8.3851	8.8916	8.301	8.55885	7.88446	8.50313	9.22184	8.13587	7.91926	8.95783	8.1092	7.88915	8.78391	8.76722	8.78986	8.63465	8.65937	8.61194	8.64113	9.4477	8.52761	8.9856	9.25237
ALG14	7.97178	8.48835	7.89489	8.33732	9.4424	7.91361	7.99887	8.01436	8.38775	8.72146	8.08734	7.90608	10.212	7.88941	9.3701	7.91371	8.20508	9.1349	8.48827	8.2214	10.5924	9.45939	7.89308	7.8987	8.07185	9.72955	7.90594	8.86061	7.89457	8.00859	7.96436	9.11794	10.2471	7.8717	8.43563	7.86039	8.0531
ALG1L	7.84576	12.3147	9.648	7.81508	7.79858	9.65773	11.33	14.0117	7.8713	7.81891	7.87176	7.96907	7.86408	9.39115	11.6489	10.8099	7.86547	9.62041	8.67826	9.60558	7.8653	7.81288	7.81414	9.13898	7.83602	7.85771	10.1032	10.2935	7.82463	9.87912	11.6415	7.95813	9.7694	11.7028	10.4295	8.77818	7.82212
ALG2	8.78337	10.4715	9.17127	8.28119	8.27884	9.03839	7.9492	8.08173	8.93996	8.43139	11.5046	9.37034	10.3395	9.32784	8.09574	9.53298	8.16566	9.44672	8.01361	8.33521	8.97452	8.54988	9.93786	9.27306	8.09887	10.2633	9.60869	8.70283	8.15575	9.17975	7.92595	8.24978	8.94652	8.28531	8.97777	9.985	10.6091
ALG3	10.7586	12.2196	12.578	9.52249	10.7841	12.5851	9.09657	10.297	11.9205	9.75421	13.301	12.6206	11.7819	10.7253	10.8606	11.7951	12.0774	11.7085	10.3561	11.0884	11.365	9.67575	12.9839	12.2213	10.7301	11.8055	11.2788	11.5999	10.5381	12.6079	12.0344	11.9551	11.9145	12.4625	12.3008	12.7354	10.4685
ALG5	10.163	10.5156	10.2743	9.30015	10.5075	9.72127	9.63731	7.91032	10.2773	8.19253	8.15517	10.3258	9.21388	9.18111	9.81839	10.5888	11.4177	10.4111	8.87717	7.91698	9.29849	8.49582	9.4825	10.532	8.16316	10.4999	9.65167	10.4593	10.1446	10.6517	10.2755	8.48983	9.77413	10.5486	10.584	10.6568	9.8393
ALG6	7.91987	7.8234	8.96444	8.12133	7.94838	7.87992	8.86122	8.2366	9.43635	7.91303	8.60695	8.21153	7.87703	7.93114	7.92295	7.93541	7.83407	8.20694	7.88687	8.33722	10.8425	7.8876	7.88681	9.43786	7.90916	7.88166	7.94397	8.7956	7.95079	7.89281	7.94181	9.02432	9.84352	7.86872	8.21762	7.89869	7.93802
ALG8	9.03985	9.36167	8.64657	9.93795	9.12514	8.75051	12.0773	10.7297	9.07648	8.89176	10.1318	9.36564	9.08159	9.27695	8.53685	8.31908	9.16065	8.88959	10.4368	10.6759	10.5496	9.41534	9.61083	9.14249	10.5116	9.17972	8.82082	8.29757	9.29858	9.17759	9.29834	11.3453	9.38009	8.75725	8.76888	8.80168	10.1791
[truncated: 20,194 more rows]
